# Supplementary material for: A Large Maize (Zea mays L.) SNP Genotyping Array: Development and Germplasm Genotyping, and Genetic Mapping to Compare with the B73 Reference Genome
Source: PubMed Central journal article supplement (PMC3234264; doi:10.1371/journal.pone.0028334), 2011-12-08

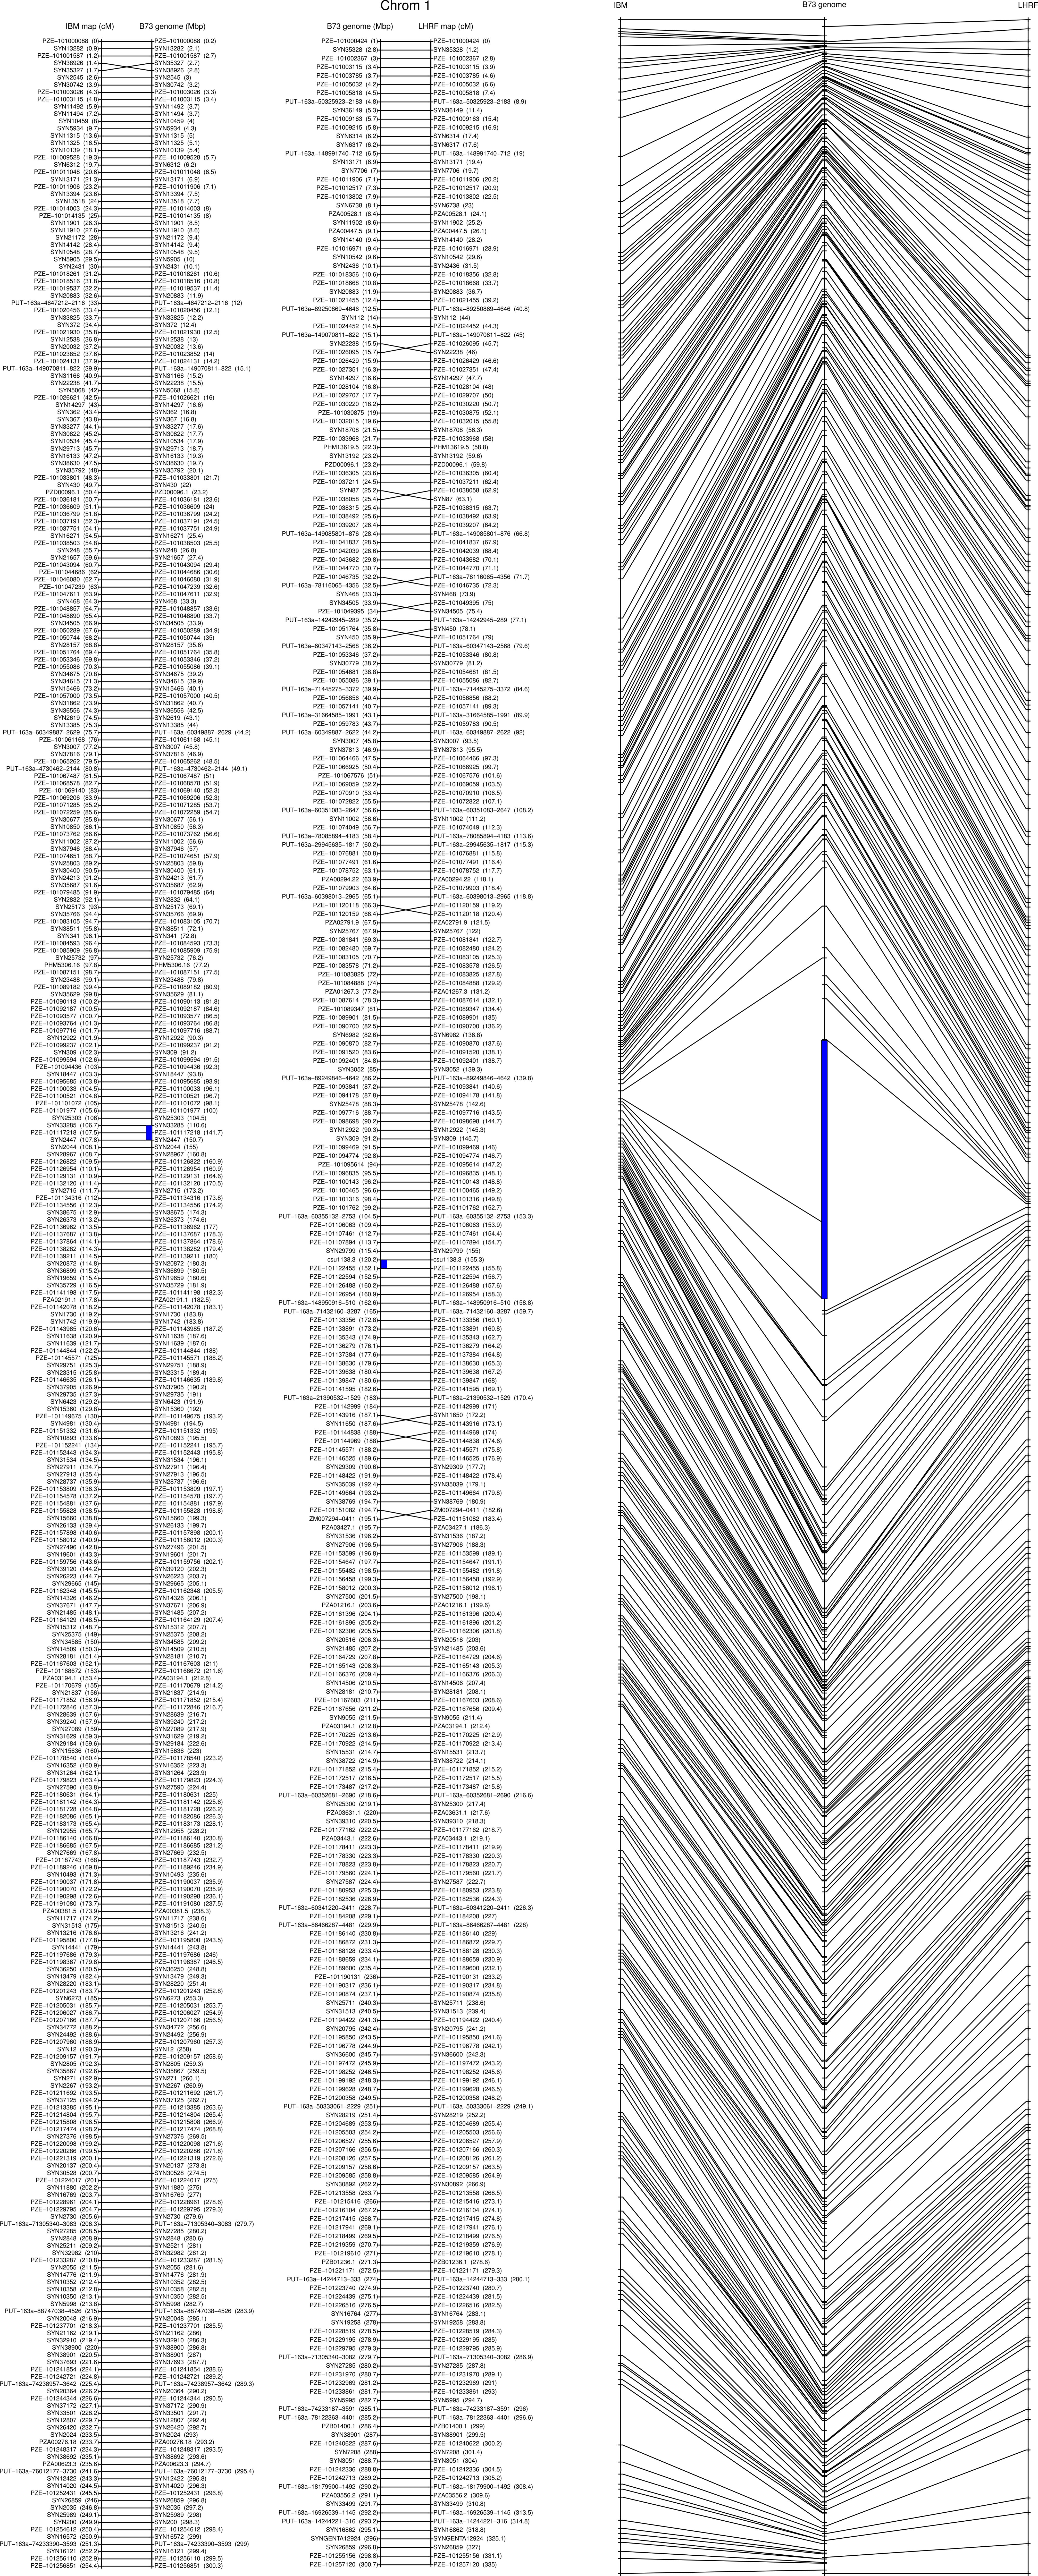

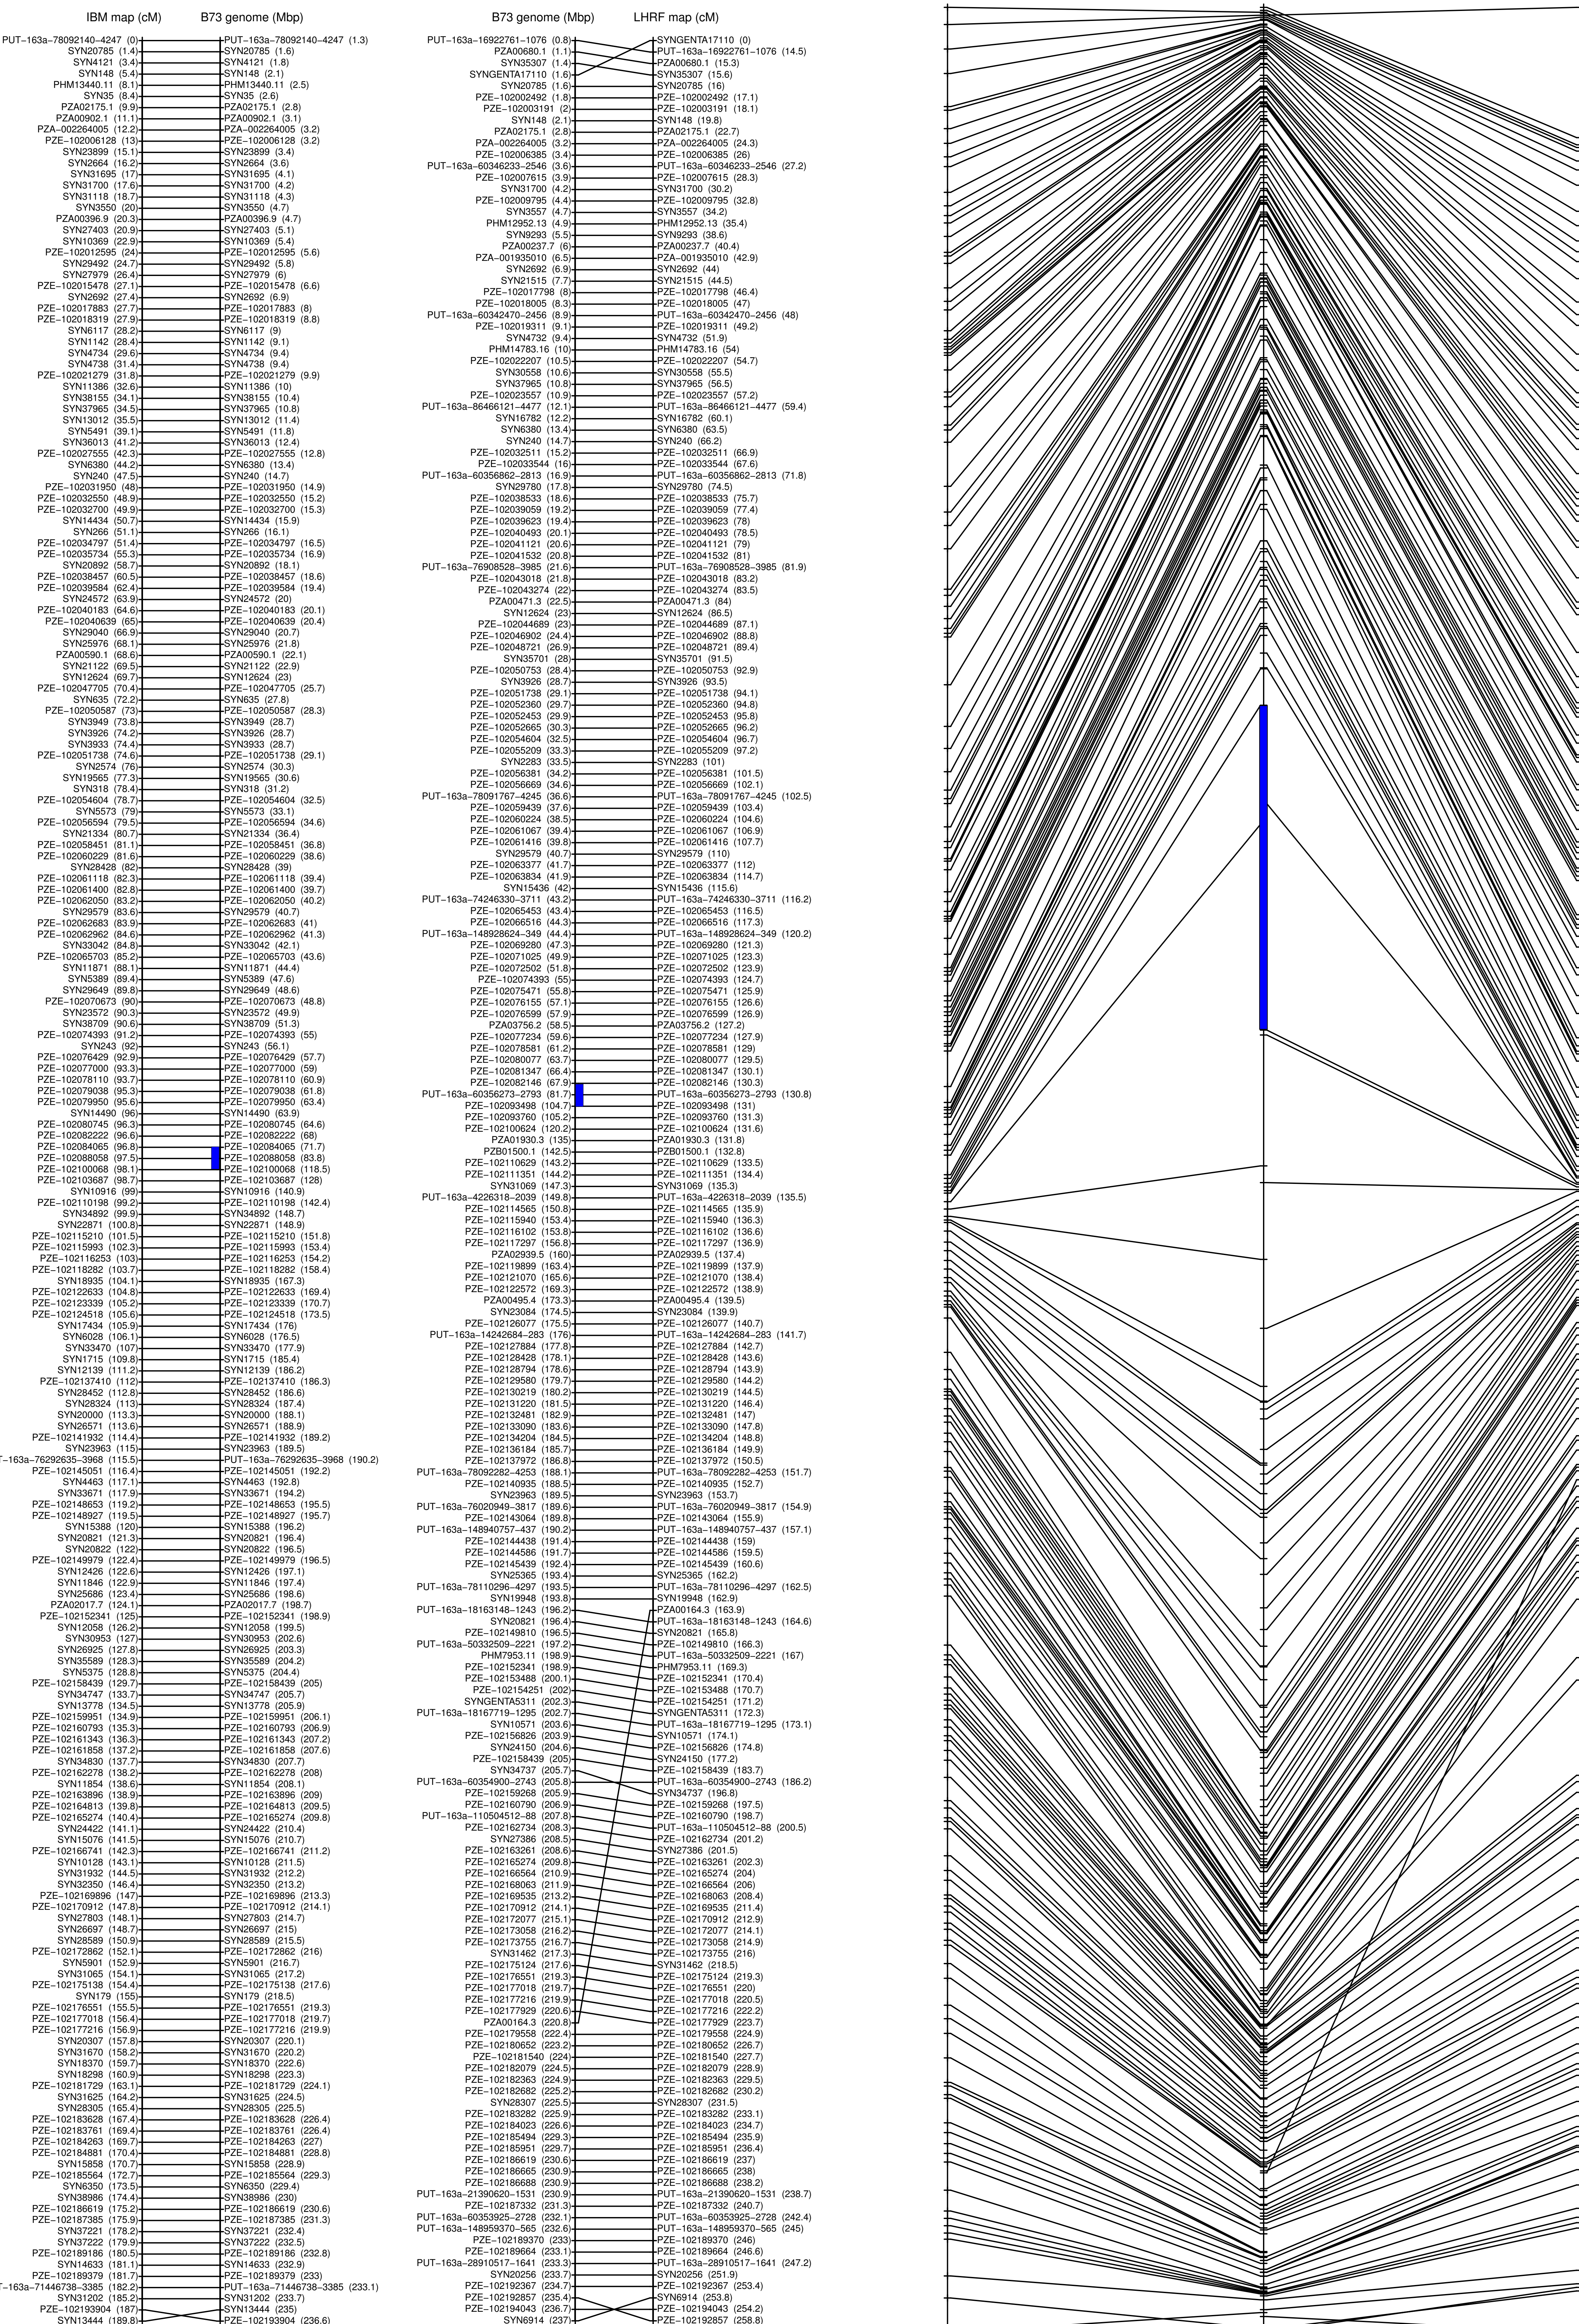

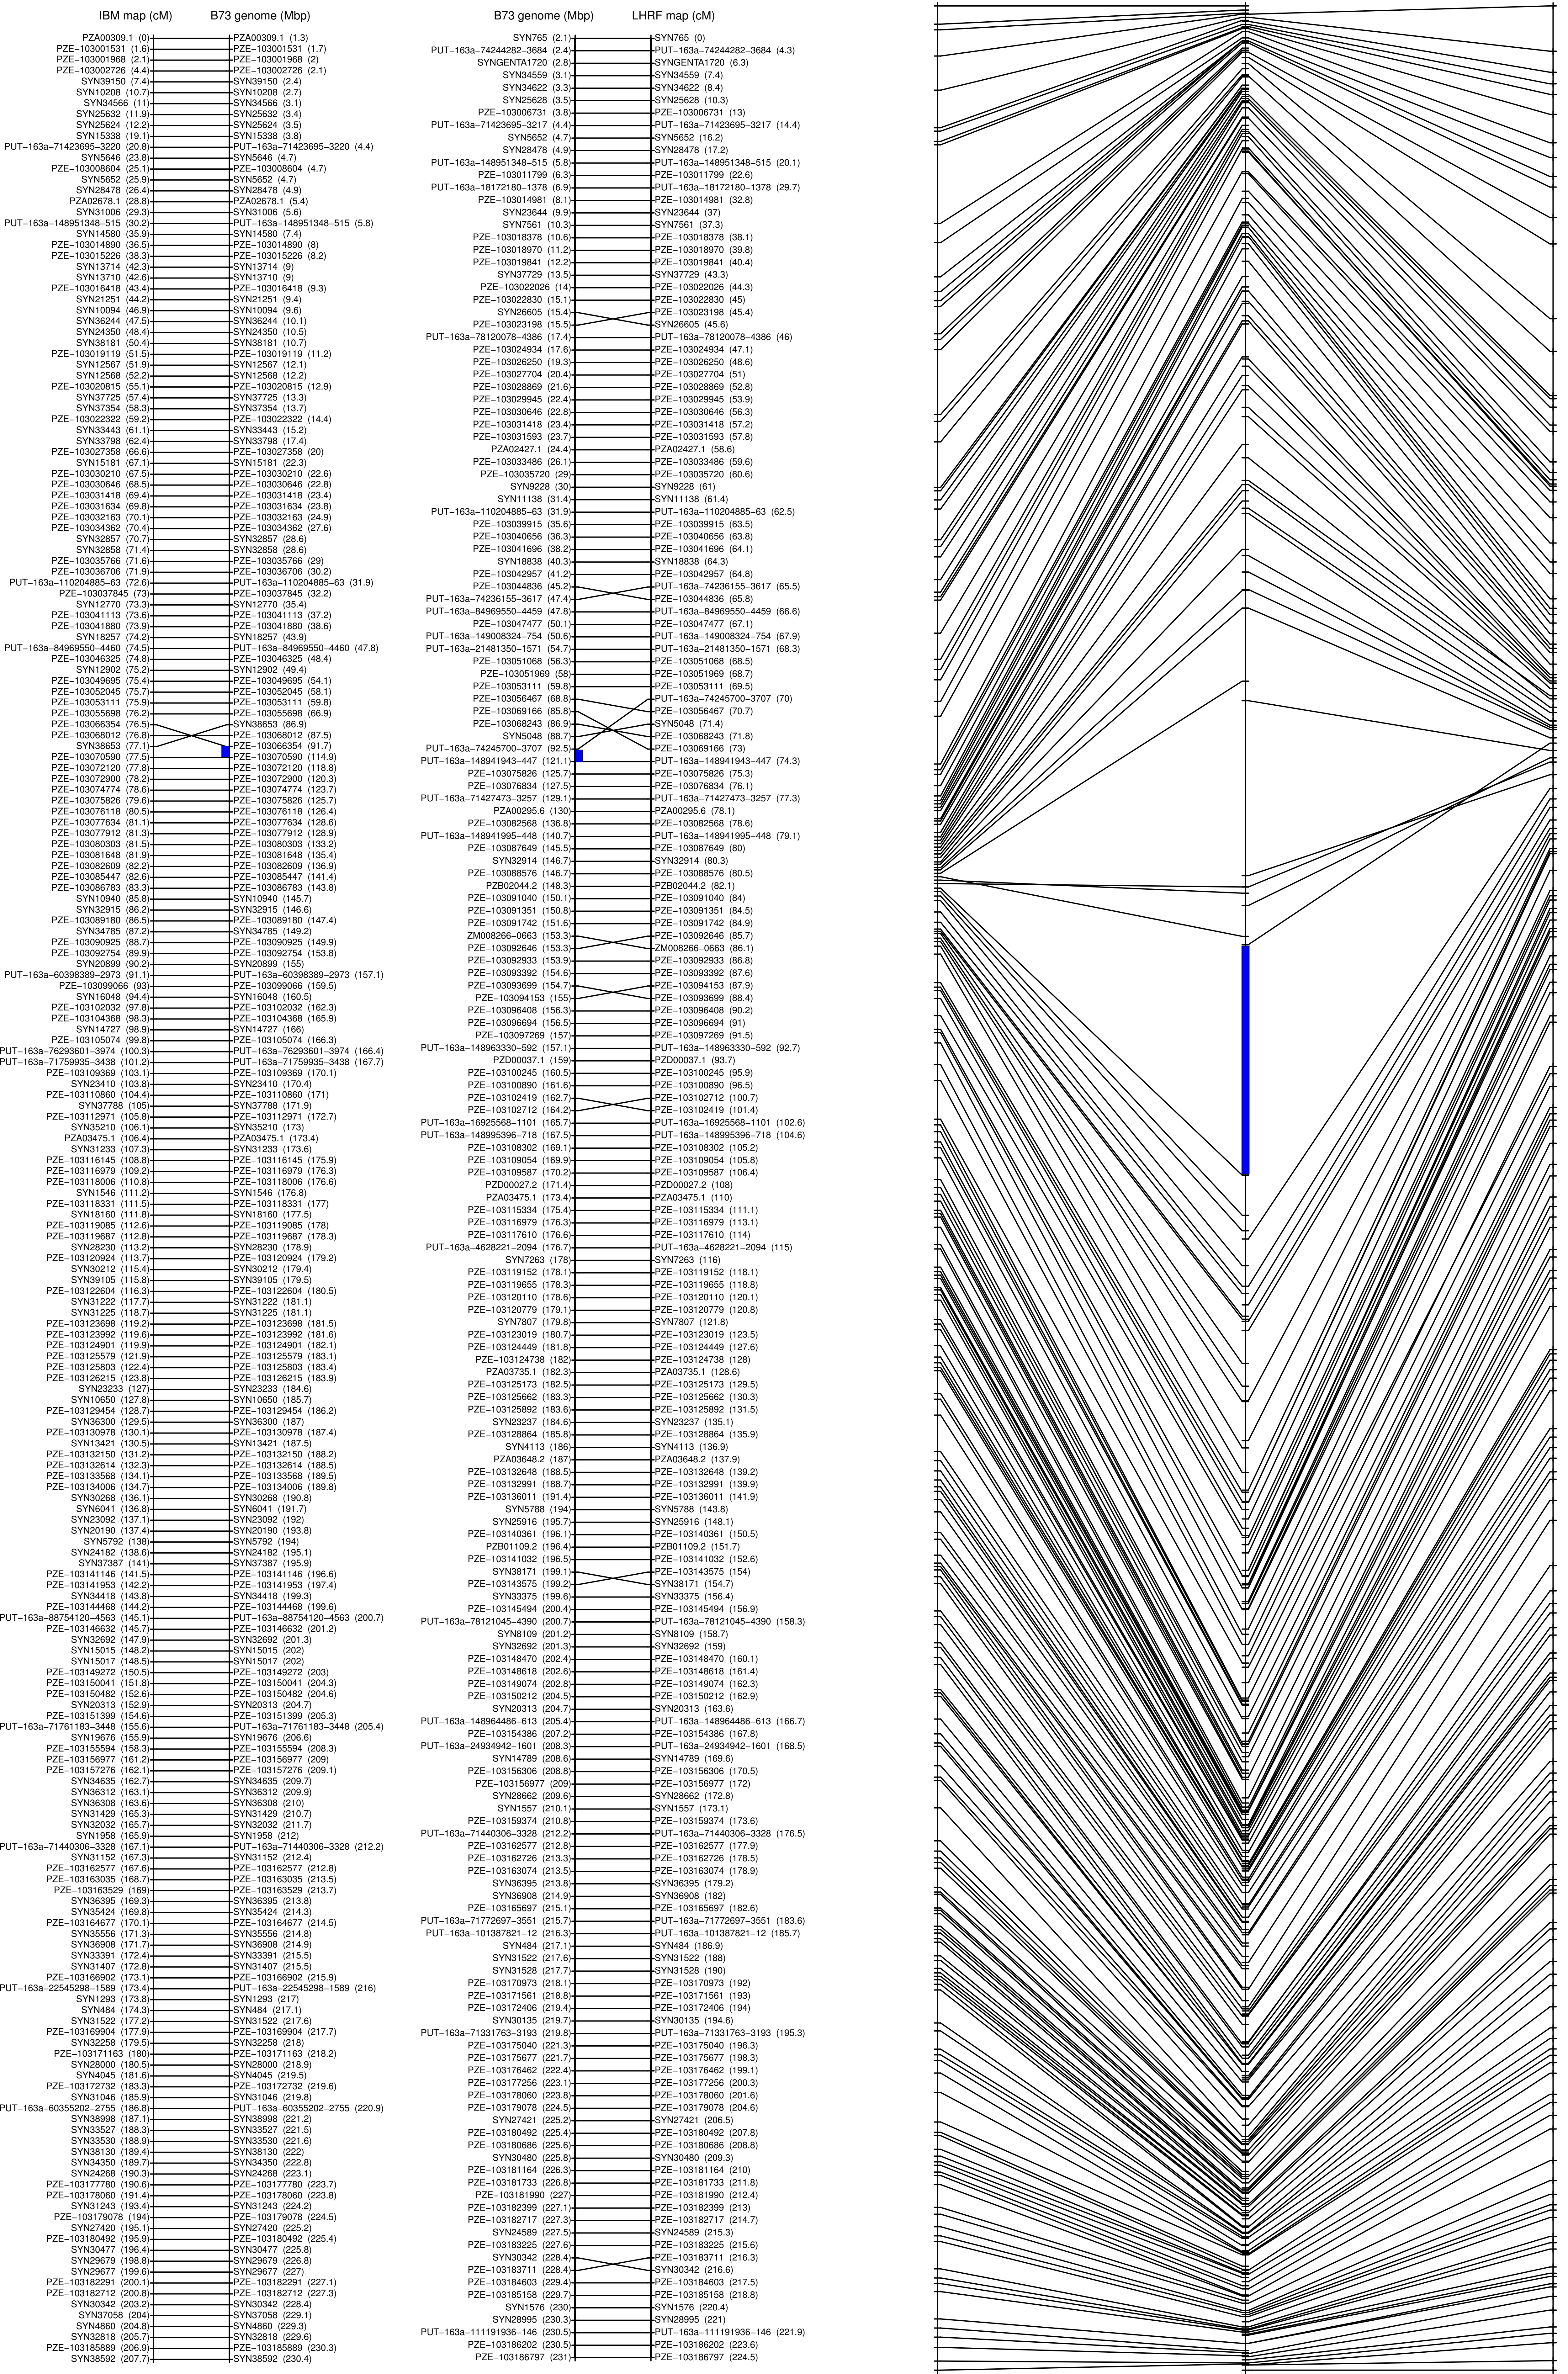

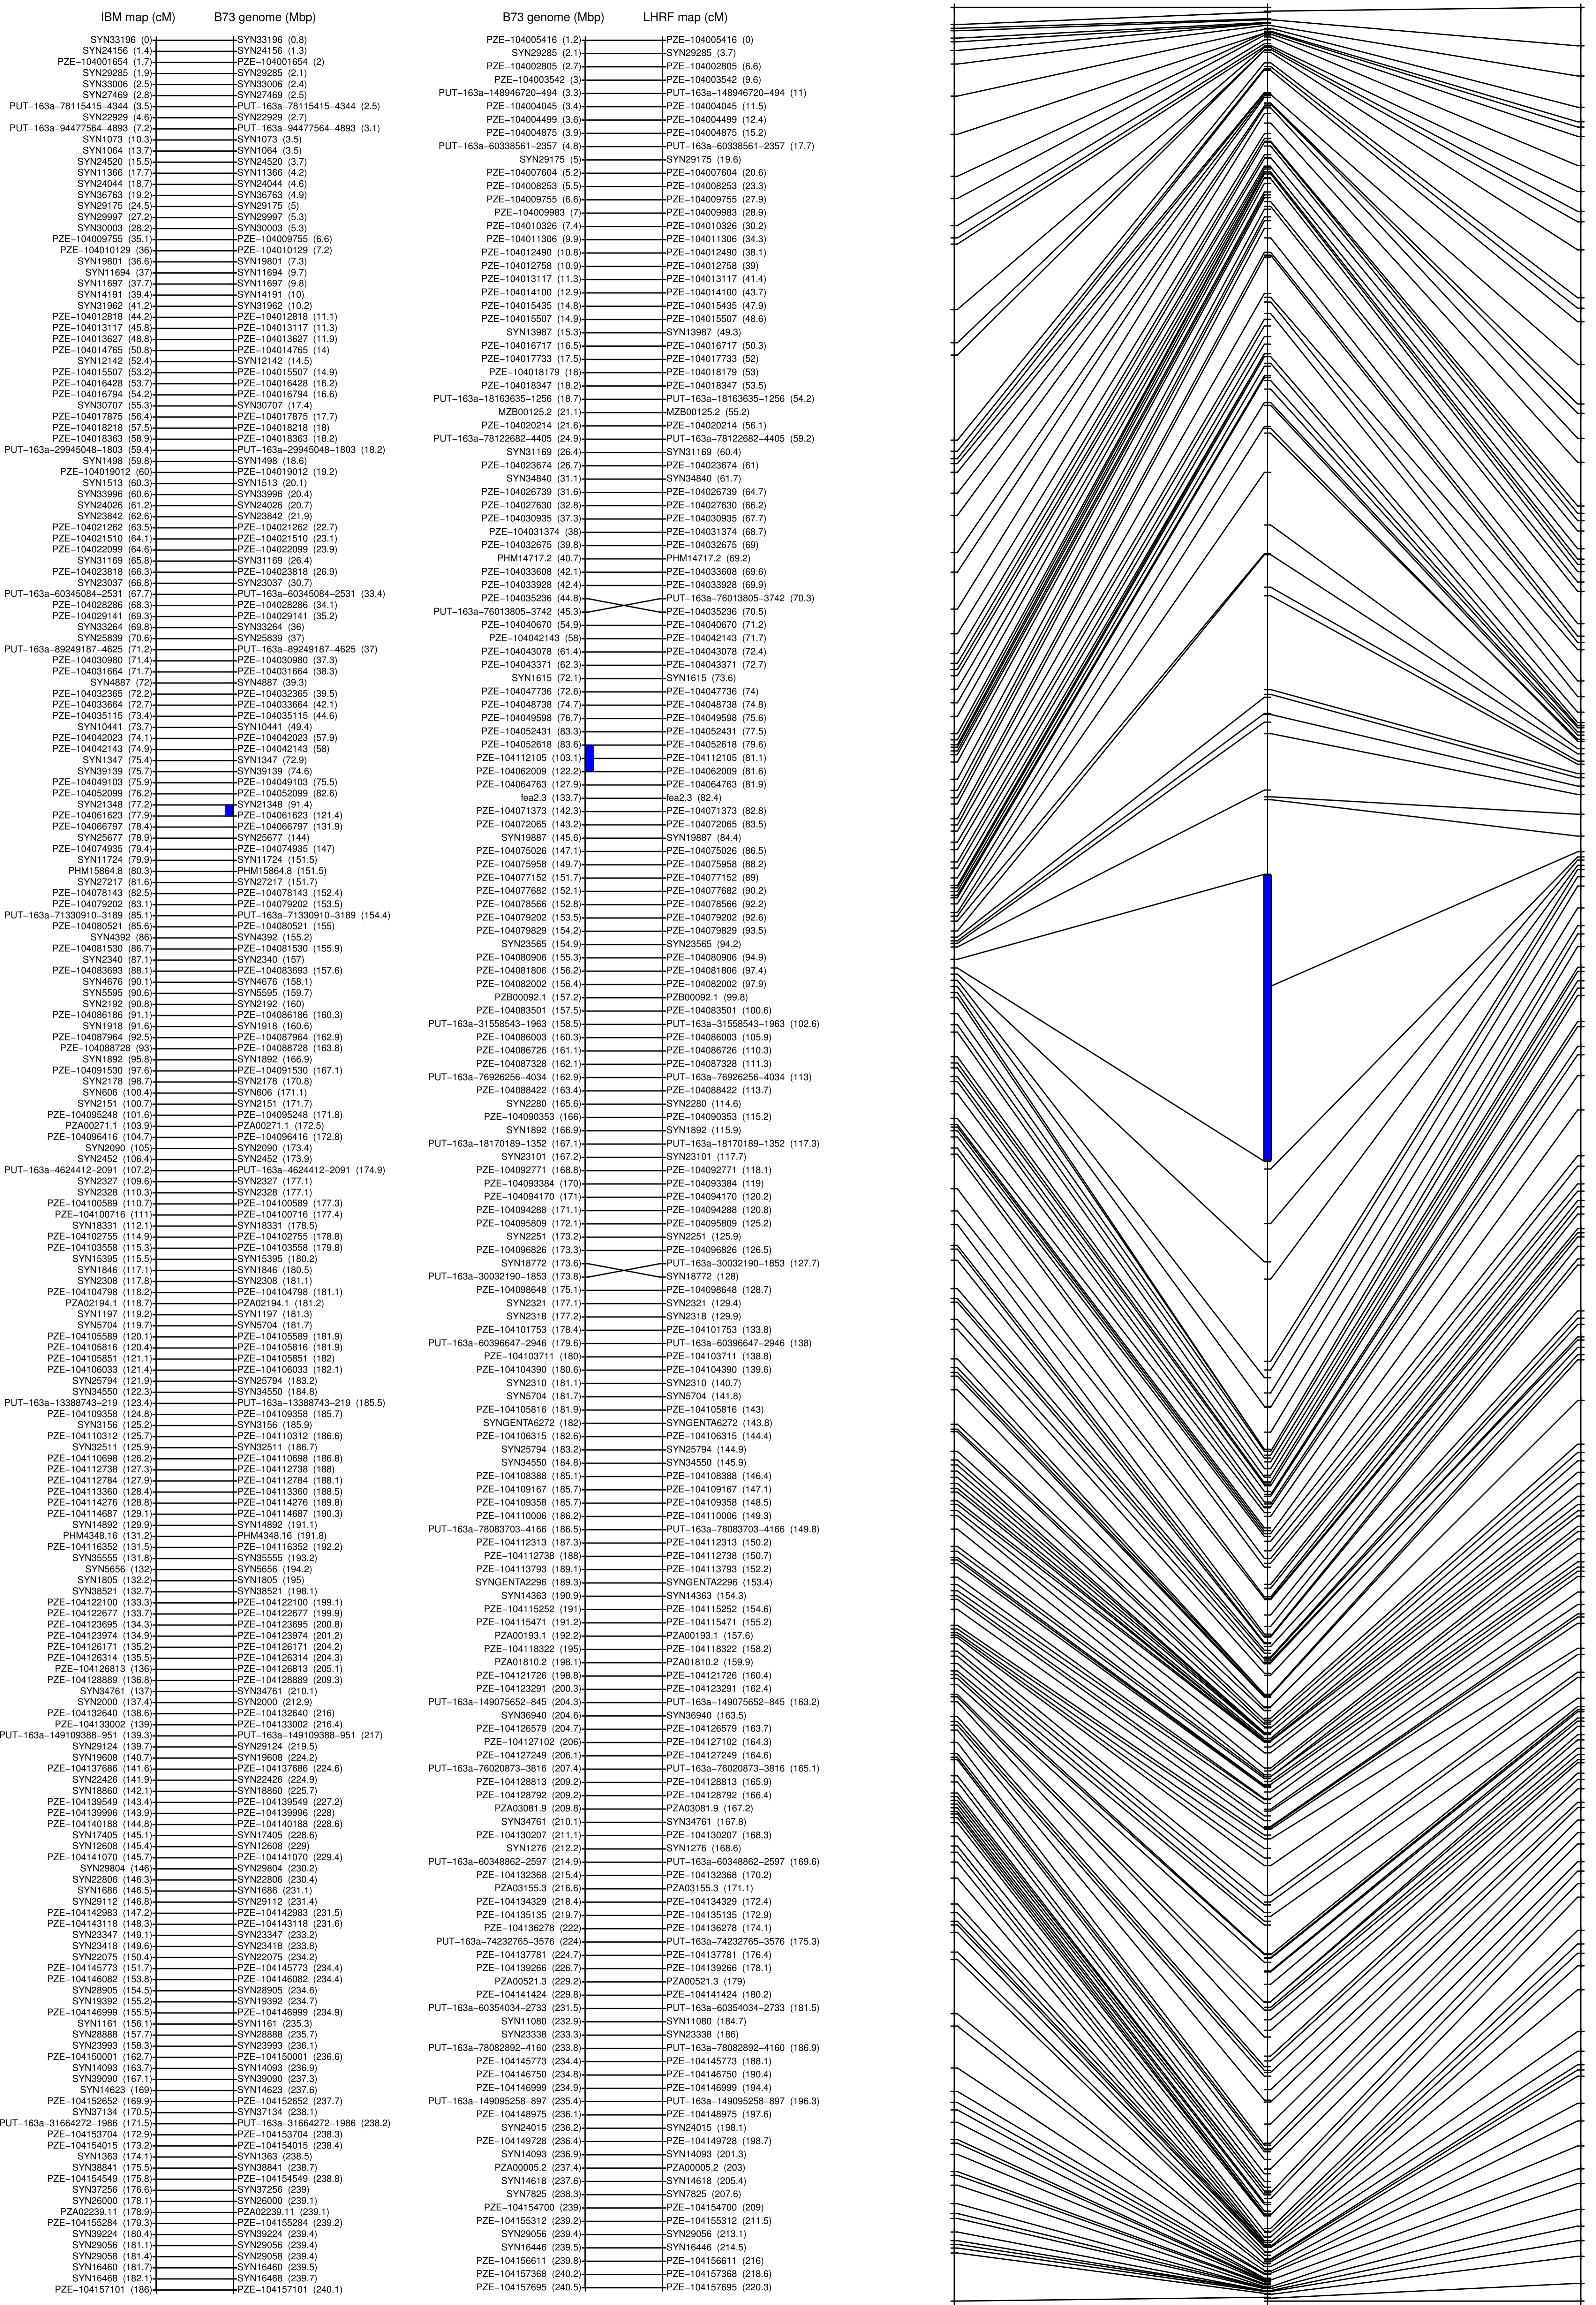

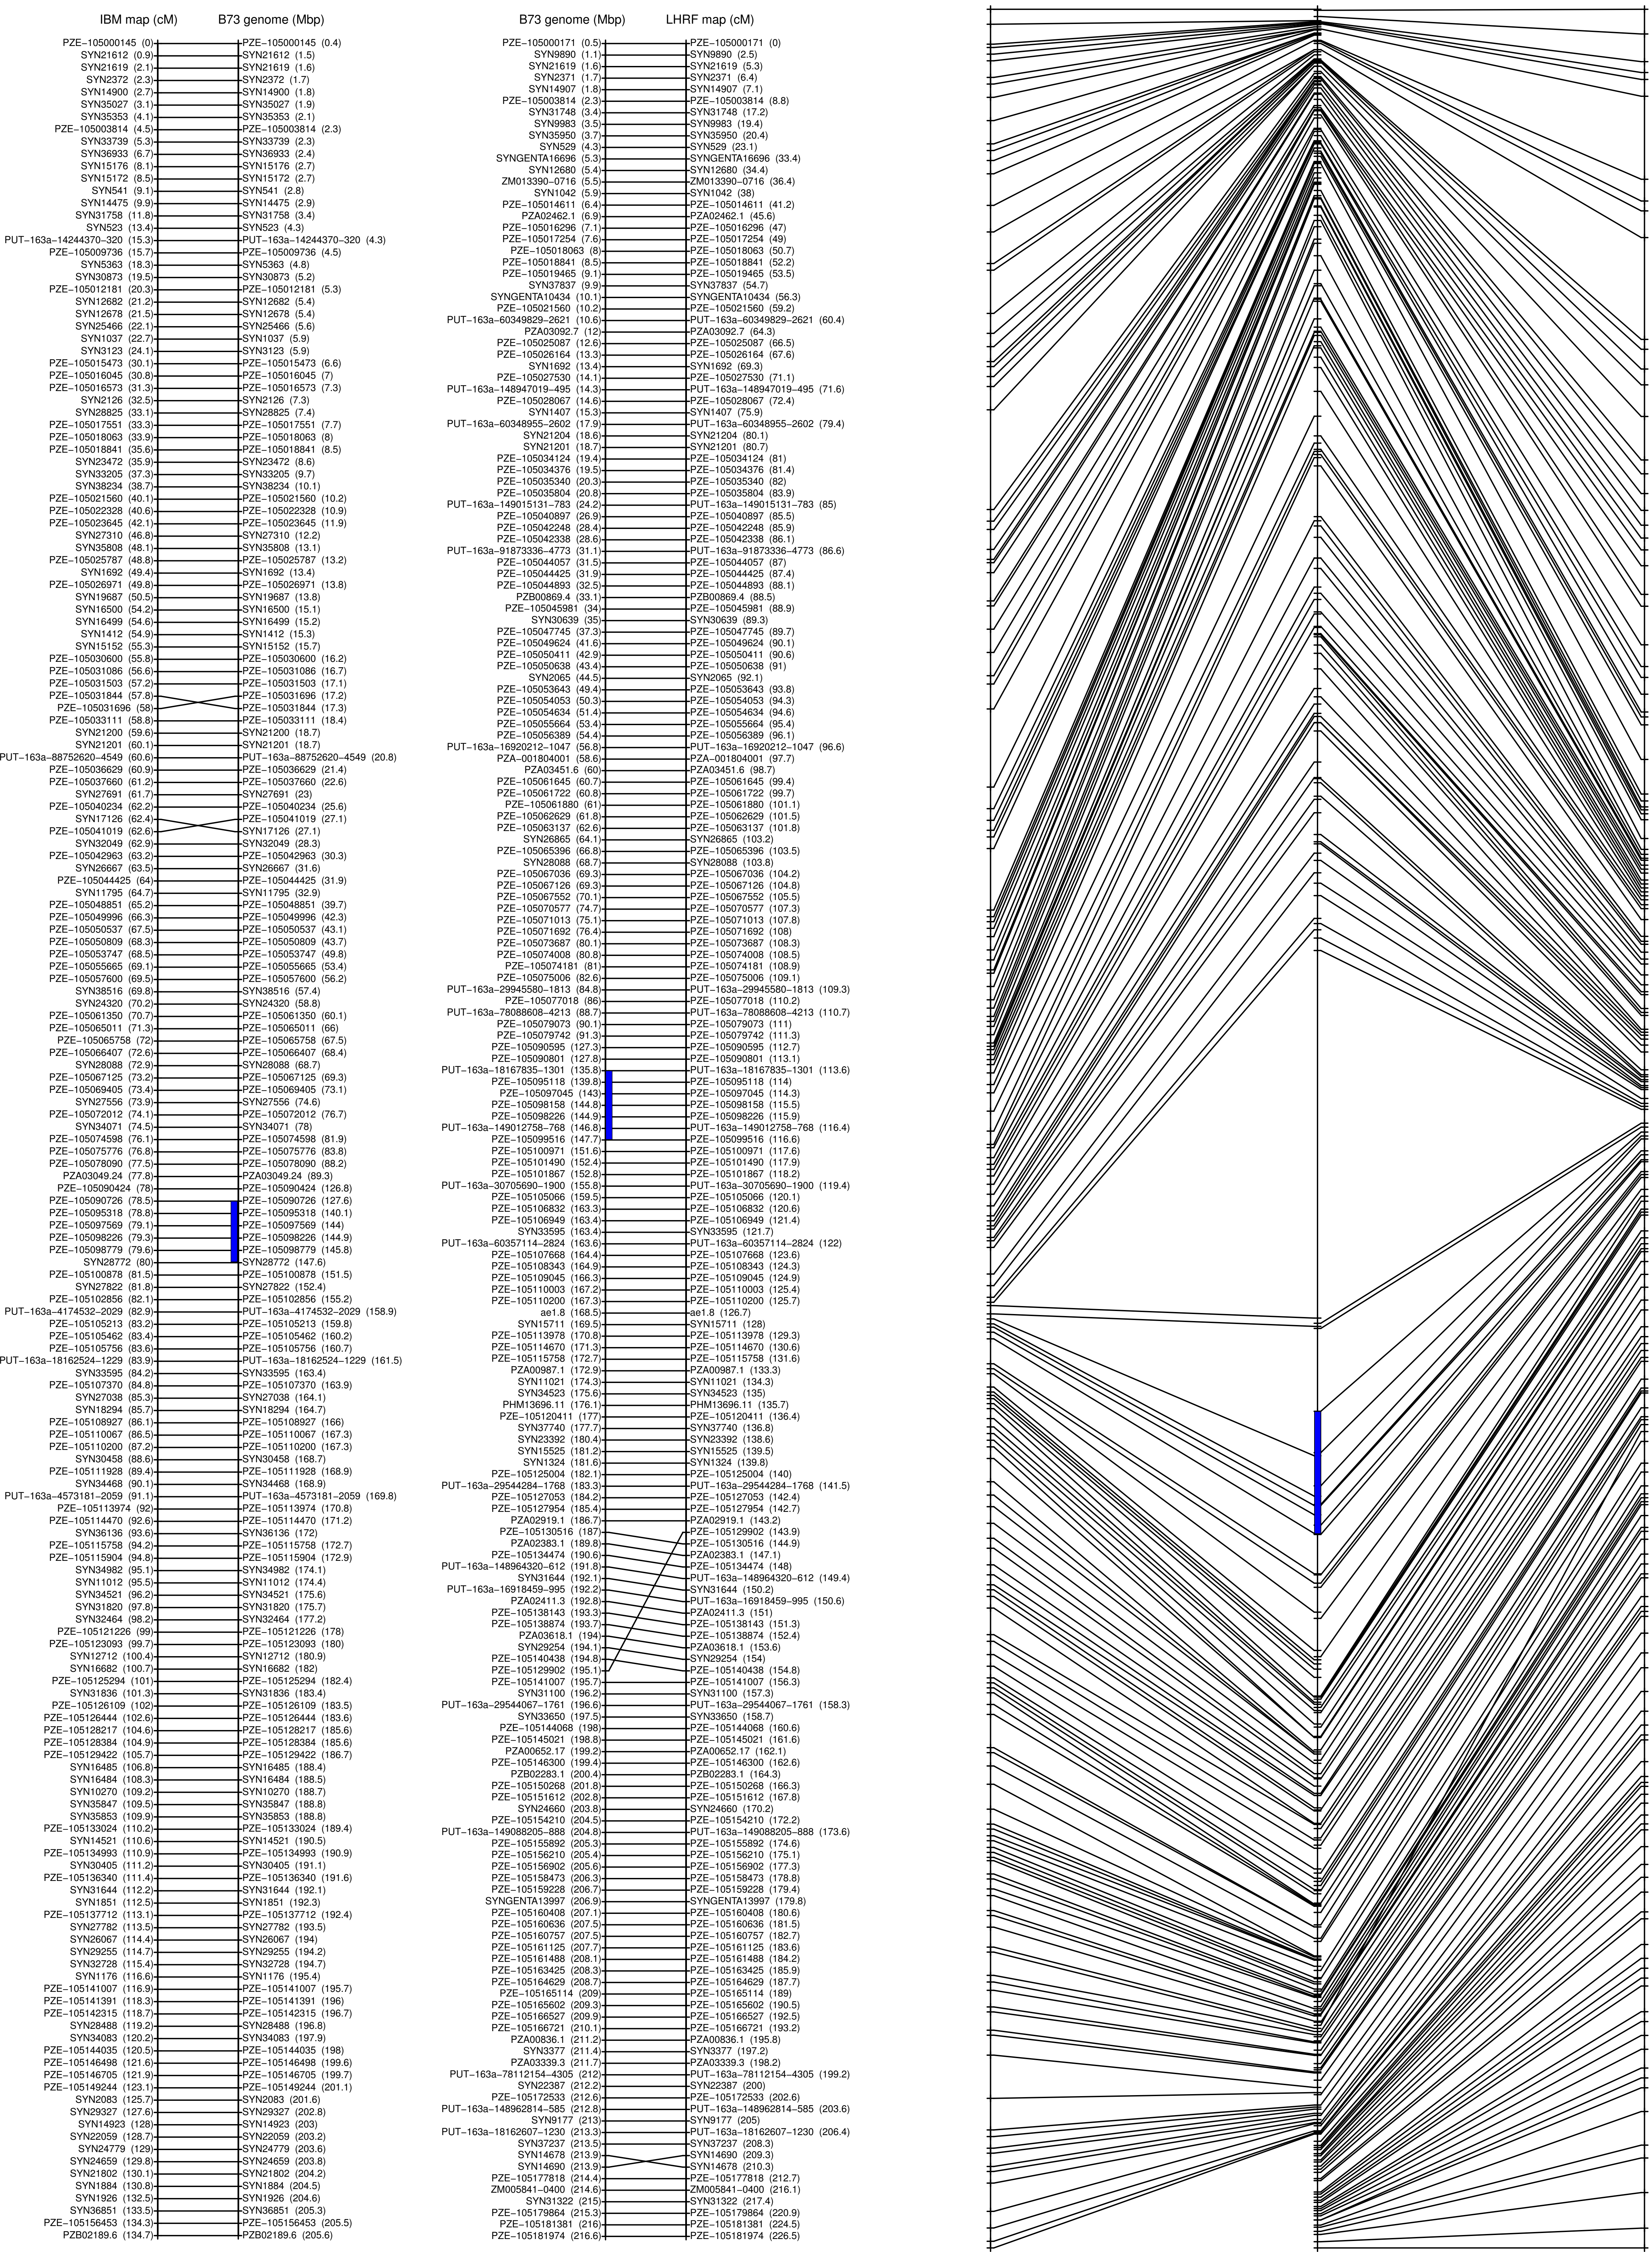

| IBM map (cM)                   | B73 genome (Mbp)               | B73 genome (Mbp)               | LHRF map (cM)                  |
|--------------------------------|--------------------------------|--------------------------------|--------------------------------|
| PZE-10600007 (0)               | PZE-10600007 (0.1)             | PZE-10600136 (0.4)             | PZE-10600136 (0)               |
| PZA00606.3 (2)                 | PZA00606.3 (2.4)               | PZE-10600507 (1.2)             | PZE-10600507 (1.9)             |
| PZE-106001672 (3.6)            | PZE-106001672 (2.7)            | PZE-106001445 (2.4)            | PZE-106001445 (3.5)            |
| SYN20093 (4.5)                 | SYN20093 (3.2)                 | SYN21052 (3.8)                 | SYN21052 (5.2)                 |
| PZE-106003203 (5.1)            | PZE-106003203 (4.1)            | PZE-106003350 (4.3)            | PZE-106003350 (5.7)            |
| SYN39272 (8.3)                 | SYN39272 (5.9)                 | PZE-106005744 (7)              | PZE-106005744 (7.1)            |
| PZE-106005094 (9.8)            | PZE-106005094 (6.5)            | PZE-106006362 (8.1)            | PZE-106006362 (7.9)            |
| SYN10561 (11.3)                | SYN10561 (6.9)                 | PUT-163a-6653985-3051 (8.7)    | PUT-163a-6653985-3051 (12.5)   |
| SYN27276 (11.9)                | SYN27276 (8.1)                 | PZE-106020499 (16.2)           | SYN25279 (17.4)                |
| PZE-106020499 (12.2)           | PZE-106020499 (16.2)           | PZE-106020773 (17.2)           | PZE-106020773 (18)             |
| PZE-106007410 (12.5)           | PZE-106007410 (21.5)           | SYN25279 (18.6)                | PZE-106020499 (18.2)           |
| PZE-106007902 (12.7)           | PZE-106007902 (22.9)           | PUT-163a-76015893-3769 (23.7)  | PUT-163a-76015893-3769 (18.4)  |
| PZE-106010060 (13.4)           | PZE-106010060 (28.1)           | PZE-106008388 (24.2)           | PZE-106008388 (19)             |
| PZE-106010115 (14.2)           | PZE-106010115 (28.1)           | PZE-106008963 (25.7)           | PZE-106008963 (19.7)           |
| PZE-106012245 (14.5)           | PZE-106012245 (31.6)           | PZE-106009237 (26.6)           | PZE-106009237 (20.2)           |
| SYN20528 (14.8)                | SYN20528 (34.5)                | PZE-106009530 (27.1)           | PZE-106009530 (20.7)           |
| PZE-106013654 (15.2)           | PZE-106013654 (34.7)           | PZE-106010459 (28.8)           | PZE-106010459 (21.9)           |
| SYN17206 (15.4)                | SYN17206 (35)                  | PZE-106011052 (29.8)           | PZE-106011052 (22.6)           |
| PZE-106015076 (15.8)           | PZE-106015076 (36.5)           | SYN31781 (32.9)                | SYN31781 (23.3)                |
| SYN11613 (16.4)                | SYN11613 (78.8)                | PZE-106013427 (34.4)           | PZE-106013427 (24.5)           |
| PZE-106033899 (17.1)           | PZE-106033899 (79.2)           | PUT-163a-18163247-1245 (35.1)  | PUT-163a-18163247-1245 (25.5)  |
| PZE-106034829 (17.3)           | PZE-106034829 (81.6)           | PZE-106014943 (36.3)           | PZE-106014943 (26.2)           |
| PZE-106035079 (17.5)           | PZE-106035079 (82)             | PUT-163a-60355888-2773 (38.3)  | PUT-163a-60355888-2773 (27)    |
| PZE-106038725 (18.3)           | PZE-106038725 (86.8)           | PZE-106016805 (39.7)           | PZE-106016805 (27.8)           |
| PZE-106039882 (19.1)           | PZE-106039882 (88.7)           | PZE-106025231 (60.2)           | PZE-106025231 (28.5)           |
| PZE-106041604 (21.9)           | PZE-106041604 (90.9)           | PUT-163a-18166160-1279 (66.2)  | PUT-163a-18166160-1279 (29)    |
| SYN11565 (22.2)                | SYN11565 (92.3)                | PUT-163a-17932440-1208 (75.5)  | PUT-163a-17932440-1208 (29.5)  |
| SYN11803 (23)                  | SYN11803 (92.6)                | PZE-106033760 (78.8)           | PZE-106033760 (30)             |
| SYN2959 (23.6)                 | SYN2959 (93.3)                 | PZE-106034767 (81.5)           | PZE-106034767 (30.5)           |
| SYN2967 (23.9)                 | SYN2967 (93.5)                 | PZA03069.4 (83)                | PZA03069.4 (31.2)              |
| PZE-106045024 (24.4)           | PZE-106045024 (94.4)           | PZE-106037197 (85.2)           | PZE-106037197 (32.2)           |
| PZE-106045763 (25.1)           | PZE-106045763 (95.1)           | PZE-106037698 (85.8)           | PZE-106037698 (33)             |
| PZE-106046102 (27)             | PZE-106046102 (95.5)           | SYN26562 (88.1)                | SYN26562 (33.9)                |
| PZE-106047470 (28.4)           | PZE-106047470 (96.7)           | PZE-106041093 (89.5)           | PZE-106041093 (38.5)           |
| PZE-106047841 (28.9)           | PZE-106047841 (96.9)           | PZE-106041836 (91.3)           | PZE-106041836 (38.9)           |
| PZE-106048558 (29.3)           | PZE-106048558 (97.5)           | PZE-106042213 (91.6)           | PZE-106042213 (39.3)           |
| PZE-106048958 (29.6)           | PZE-106048958 (97.9)           | PZE-106042764 (92.3)           | PZE-106042764 (40.5)           |
| PZE-106049264 (30.1)           | PZE-106049264 (98.3)           | PUT-163a-29130520-1738 (92.8)  | PUT-163a-29130520-1738 (43.2)  |
| PZE-106049462 (30.4)           | PZE-106049462 (98.6)           | PZE-106043119 (93)             | PZE-106043119 (44)             |
| SYN3641 (31.1)                 | SYN3641 (99.8)                 | SYN32684 (93)                  | SYN32684 (44.2)                |
| PZE-106050525 (31.3)           | PZE-106050525 (100.3)          | PZE-106043303 (93.2)           | PZE-106043303 (44.5)           |
| SYN30048 (31.6)                | SYN30048 (102.2)               | PZE-106044809 (93.9)           | PZE-106044809 (45.4)           |
| PZE-106051936 (32.1)           | PZE-106051936 (102.7)          | PZE-106045409 (94.8)           | PZE-106045409 (46.1)           |
| PZE-106052904 (33.1)           | PZE-106052904 (103.4)          | PZE-106045904 (95.3)           | PZE-106045904 (49.7)           |
| PZE-106053072 (33.8)           | PZE-106053072 (103.5)          | SYN24469 (95.9)                | SYN24469 (50.9)                |
| SYN12088 (34.2)                | SYN12088 (104.5)               | PZE-106046852 (96.3)           | PZE-106046852 (51.8)           |
| PZE-106054425 (36.2)           | PZE-106054425 (105)            | PZE-106047652 (96.9)           | PZE-106047652 (53.4)           |
| PZE-106054710 (36.8)           | PZE-106054710 (105.2)          | PZE-106047802 (96.9)           | PZE-106047802 (54.7)           |
| SYN23500 (37.5)                | SYN23500 (105.4)               | PZE-106049549 (98.6)           | PZE-106049549 (55.6)           |
| PZE-106055794 (37.9)           | PZE-106055794 (106.2)          | PZE-106049961 (99.8)           | PZE-106049961 (56)             |
| PZE-106056703 (38.1)           | PZE-106057989 (106.9)          | PZE-106050525 (100.3)          | PZE-106050525 (58)             |
| PZE-106057989 (38.5)           | PZE-106059535 (108.3)          | PZE-106051936 (102.7)          | PZE-106051936 (60)             |
| PZE-106059535 (40.4)           | PZE-106059789 (108.5)          | PZE-106052904 (103.4)          | PZE-106052904 (63.2)           |
| PZE-106059789 (40.9)           | SYN32815 (109)                 | ZM013755-0374 (103.9)          | ZM013755-0374 (64.4)           |
| SYN32815 (41.3)                | SYN24768 (109.1)               | SYN12088 (104.5)               | SYN12088 (65.2)                |
| SYN24768 (41.8)                | PZE-106060613 (109.5)          | PZE-106054425 (105)            | PZE-106054425 (67)             |
| PZE-106060613 (42.6)           | PZE-106056703 (110.5)          | SYN29718 (105.6)               | SYN29718 (68.9)                |
| PZE-106061055 (44.4)           | PZE-106061055 (111.9)          | SYN14084 (105.9)               | SYN14084 (69.2)                |
| PZE-106061431 (45.1)           | PZE-106061431 (112.2)          | SYN28492 (106.3)               | SYN28492 (70.4)                |
| SYN30628 (45.8)                | SYN30628 (112.3)               | PUT-163a-148945329-486 (107)   | PZE-106056547 (71.1)           |
| PZE-106061688 (46)             | PZE-106061688 (112.4)          | SYN38138 (112.8)               | PUT-163a-31909945-2001 (71.6)  |
| SYN38138 (46.3)                | SYN38138 (112.8)               | PZE-106059293 (108.2)          | PUT-163a-148945329-486 (73.4)  |
| PZE-106062474 (47.3)           | PZE-106062474 (113.3)          | PZE-106059789 (108.5)          | PZE-106059293 (74.2)           |
| PZE-106063012 (47.8)           | PZE-106063012 (114.2)          | PZE-106060302 (109.1)          | PZE-106059789 (78.7)           |
| PZE-106064188 (48.2)           | PZE-106064188 (115.6)          | PZE-106060834 (109.9)          | PZE-106060302 (79.2)           |
| PZE-106065285 (48.6)           | PZE-106065285 (117.6)          | PZE-106056547 (110.3)          | PZE-106060834 (80.2)           |
| PZE-106065440 (49.1)           | PZE-106065440 (117.6)          | PUT-163a-31909945-2001 (110.7) | PZE-106057592 (81)             |
| SYN23913 (49.6)                | SYN23913 (117.8)               | PZE-106057284 (111.2)          | PZE-106057284 (82.3)           |
| SYN23909 (50.2)                | SYN23909 (117.9)               | PZE-106057592 (111.5)          | PZE-106061055 (83.5)           |
| SYN29425 (50.6)                | SYN29425 (118.1)               | PZE-106061440 (112.2)          | PZE-106061440 (83.9)           |
| PZE-106065653 (51)             | PZE-106065653 (118.7)          | SYN30626 (112.4)               | SYN30626 (84.6)                |
| PZE-106067224 (51.4)           | PZE-106067224 (120.1)          | SYN38138 (112.8)               | SYN38138 (85.3)                |
| PUT-163a-86468823-4491 (52.1)  | PUT-163a-86468823-4491 (120.9) | PUT-163a-60357221-2827 (113.3) | PUT-163a-60357221-2827 (86.5)  |
| PZE-106069625 (52.7)           | PZE-106069625 (123.3)          | PZE-106063074 (114.4)          | PZE-106063074 (87.3)           |
| SYN26935 (53.5)                | SYN26935 (123.4)               | PUT-163a-29577015-1798 (115.1) | PUT-163a-29577015-1798 (89)    |
| PZE-106070038 (53.8)           | PZE-106070038 (124)            | PZE-106065229 (117.5)          | PZE-106065229 (89.7)           |
| PZE-106070387 (54.6)           | PZE-106070387 (124.5)          | PZE-106065440 (117.6)          | PZE-106065440 (91)             |
| PZE-106070575 (55.4)           | PZE-106070575 (124.8)          | SYN29431 (118.1)               | PZE-106066077 (91.8)           |
| PZE-106072074 (55.7)           | PZE-106072074 (127.7)          | PZE-106066077 (118.2)          | SYN29431 (92.1)                |
| SYN24366 (56.7)                | SYN24366 (129.5)               | PZE-106066701 (118.9)          | PZE-106066701 (92.5)           |
| PZE-106074560 (57.2)           | PZE-106074560 (130)            | PUT-163a-86468823-4491 (120.9) | PUT-163a-86468823-4491 (93.4)  |
| PZE-106074780 (57.5)           | PZE-106074780 (130)            | PZE-106069690 (123.4)          | PZE-106069690 (93.7)           |
| PZE-106075520 (58.1)           | PZE-106075520 (130.8)          | PZA00473.5 (124.1)             | PZA00473.5 (94)                |
| SYN3765 (58.7)                 | SYN3765 (132)                  | PUT-163a-60355148-2754 (125.2) | PUT-163a-60355148-2754 (94.6)  |
| PZE-106076828 (59.6)           | PZE-106076828 (132.3)          | PZE-106072609 (128.2)          | PZE-106072609 (95.7)           |
| PZE-106077055 (60)             | PZE-106077055 (132.5)          | SYN24367 (129.5)               | SYN24367 (98.5)                |
| PZA00250.1 (60.8)              | PZA00250.1 (132.9)             | PZE-106074750 (130)            | PZE-106074750 (99.7)           |
| PZE-106081362 (61.3)           | PZE-106081362 (138.5)          | PZB00416.2 (131.2)             | PZB00416.2 (100.9)             |
| SYN4850 (61.6)                 | SYN4850 (138.9)                | PZE-106075973 (131.4)          | PZE-106075973 (101.2)          |
| PZE-106083170 (62.3)           | PZE-106083170 (140.5)          | PZD00011.3 (131.8)             | PZD00011.3 (101.5)             |
| SYN26383 (63.4)                | SYN26383 (142.3)               | PZE-106076719 (132.2)          | PZE-106076719 (101.7)          |
| PZE-106085963 (64.1)           | PZE-106085963 (143)            | PZE-106077002 (132.4)          | PZE-106077002 (102.2)          |
| SYN32129 (65.4)                | SYN32129 (145.3)               | PZA00250.1 (132.9)             | PZA00250.1 (103.2)             |
| SYN28980 (65.7)                | SYN28980 (146.2)               | PZE-106078961 (134.8)          | PZE-106078961 (104.5)          |
| SYN27107 (67)                  | SYN27107 (147.1)               | PZE-106079658 (135.9)          | PZE-106079658 (105.8)          |
| SYN29374 (67.9)                | SYN29374 (147.9)               | PZE-106080799 (137.7)          | PZE-106080799 (106.4)          |
| PZE-106092386 (69.6)           | PZE-106092386 (148.5)          | PZE-106081904 (138.9)          | PZE-106081904 (107.4)          |
| SYN25266 (70.1)                | SYN25266 (148.8)               | PZE-106082617 (139.9)          | PZE-106082617 (107.9)          |
| PZE-106093812 (71.6)           | PZE-106093812 (149.4)          | PUT-163a-149110076-960 (140.3) | PUT-163a-149110076-960 (108.2) |
| SYN4801 (72.9)                 | SYN4801 (150.7)                | PZE-106084436 (141.6)          | PZE-106084436 (109.1)          |
| SYN11816 (73.8)                | SYN11816 (150.7)               | PZE-106084780 (142.1)          | PZE-106084780 (109.8)          |
| SYN11808 (75)                  | SYN11808 (150.8)               | SYN26382 (142.4)               | SYN26382 (110)                 |
| SYN11807 (75.3)                | SYN11807 (150.8)               | SYN30964 (142.6)               | SYN30964 (110.3)               |
| SYN11809 (77.4)                | SYN11809 (150.8)               | PZA02148.1 (143.7)             | PZA02148.1 (110.9)             |
| PZE-106096872 (78.5)           | PZE-106096872 (150.9)          | PZE-106087420 (144.9)          | PZE-106087420 (112.6)          |
| SYN37999 (79.7)                | SYN37999 (151.4)               | PUT-163a-148991135-703 (145.1) | PUT-163a-148991135-703 (112.8) |
| SYN35959 (81.2)                | SYN35959 (151.6)               | PUT-163a-4730530-2146 (146)    | PUT-163a-4730530-2146 (113.3)  |
| PZE-106098680 (82)             | PZE-106098680 (152.3)          | SYN14246 (146.9)               | SYN14246 (114.6)               |
| SYN30391 (83.3)                | SYN30391 (153.2)               | PHM11985.27 (147.2)            | PHM11985.27 (116.6)            |
| SYN24056 (84.3)                | SYN24056 (153.6)               | PUT-163a-93281684-4843 (147.7) | PUT-163a-93281684-4843 (117.3) |
| SYN24461 (85.6)                | SYN24461 (154.1)               | SYN29374 (147.9)               | SYN29374 (119.3)               |
| SYN10485 (85.9)                | SYN10485 (154.3)               | PZE-106092530 (148.6)          | PZE-106092530 (121)            |
| PZE-106103012 (86.7)           | PZE-106103012 (154.9)          | SYN25272 (148.8)               | SYN25272 (122.9)               |
| SYN23855 (87.8)                | SYN23855 (155.5)               | SYN32093 (149.5)               | SYN32093 (123.2)               |
| PZE-106104994 (88.6)           | PZE-106104994 (155.6)          | PUT-163a-94477459-4887 (149.8) | PUT-163a-94477459-4887 (123.6) |
| PZE-106106877 (90.8)           | PZE-106106877 (156.7)          | PZE-106095859 (150.7)          | PZE-106095859 (124.7)          |
| SYN23624 (91.9)                | SYN23624 (156.8)               | PZE-106096901 (150.9)          | PZE-106096901 (125.8)          |
| SYN23628 (92.7)                | SYN23628 (156.9)               | SYN37999 (151.4)               | SYN37999 (127)                 |
| SYN3998 (93.9)                 | SYN3998 (157.8)                | SYN26318 (151.8)               | SYN26318 (127.7)               |
| SYN19164 (95.2)                | SYN19164 (158.3)               | PZE-106097991 (151.8)          | PZE-106097991 (128.4)          |
| SYN19161 (96.9)                | SYN19161 (158.4)               | SYN30396 (152.8)               | SYN30396 (129.9)               |
| SYN27765 (97.5)                | SYN27765 (159)                 | PHM15251.3 (153)               | PHM15251.3 (130.4)             |
| SYN27121 (100)                 | SYN27121 (159.8)               | SYN30392 (153.3)               | SYN30392 (131.4)               |
| SYN21356 (100.5)               | SYN21356 (160)                 | SYN24056 (153.6)               | SYN24056 (132.2)               |
| SYN26168 (102.2)               | SYN26168 (160.2)               | PZE-106102069 (154.2)          | PZE-106102069 (133.2)          |
| PZE-106114021 (102.5)          | PZE-106114021 (160.3)          | PUT-163a-18168918-1324 (154.8) | PUT-163a-18168918-1324 (134.1) |
| PZE-106114426 (102.8)          | PZE-106114426 (160.6)          | PUT-163a-31406277-1936 (155.4) | PUT-163a-31406277-1936 (136)   |
| SYN23743 (103.4)               | SYN23743 (161)                 | SYN23860 (155.6)               | SYN23860 (136.8)               |
| SYN32875 (104.2)               | SYN32875 (161.5)               | PZE-106105143 (155.7)          | PZE-106105143 (137.8)          |
| PZE-106116673 (105.3)          | PZE-106116673 (161.9)          | PZA03027.12 (156.5)            | PZA03027.12 (138.3)            |
| PUT-163a-60338619-2360 (111.6) | PUT-163a-60338619-2360 (162.2) | PZE-106106978 (156.8)          | PZE-106106978 (138.8)          |
| SYN24537 (112.3)               | SYN24537 (162.6)               | PUT-163a-60339740-2390 (157)   | PUT-163a-60339740-2390 (139.5) |
| SYN22989 (112.7)               | SYN22989 (162.7)               | PUT-163a-78075766-4101 (158.2) | PUT-163a-78075766-4101 (140.2) |
| SYN22988 (113.6)               | SYN22988 (162.7)               | SYN10769 (158.5)               | SYN10769 (142.3)               |
| SYN16022 (114.5)               | SYN16022 (162.9)               | PUT-163a-78074902-4096 (163)   | PUT-163a-78074902-4096 (163)   |
| PUT-163a-78074902-4096 (114.8) | PUT-163a-78074902-4096 (163)   | SYN4177 (158.7)                | SYN4177 (144.4)                |
| SYN34376 (115.2)               | SYN34376 (163.2)               | PZE-106111667 (159.3)          | PZE-106111667 (145.8)          |
| SYN13307 (115.8)               | SYN13307 (163.8)               | PZE-106111961 (159.5)          | PZE-106111961 (146.3)          |
| SYN13308 (116.9)               | SYN13308 (163.8)               | PZE-106112096 (159.6)          | PZE-106112096 (146.            |

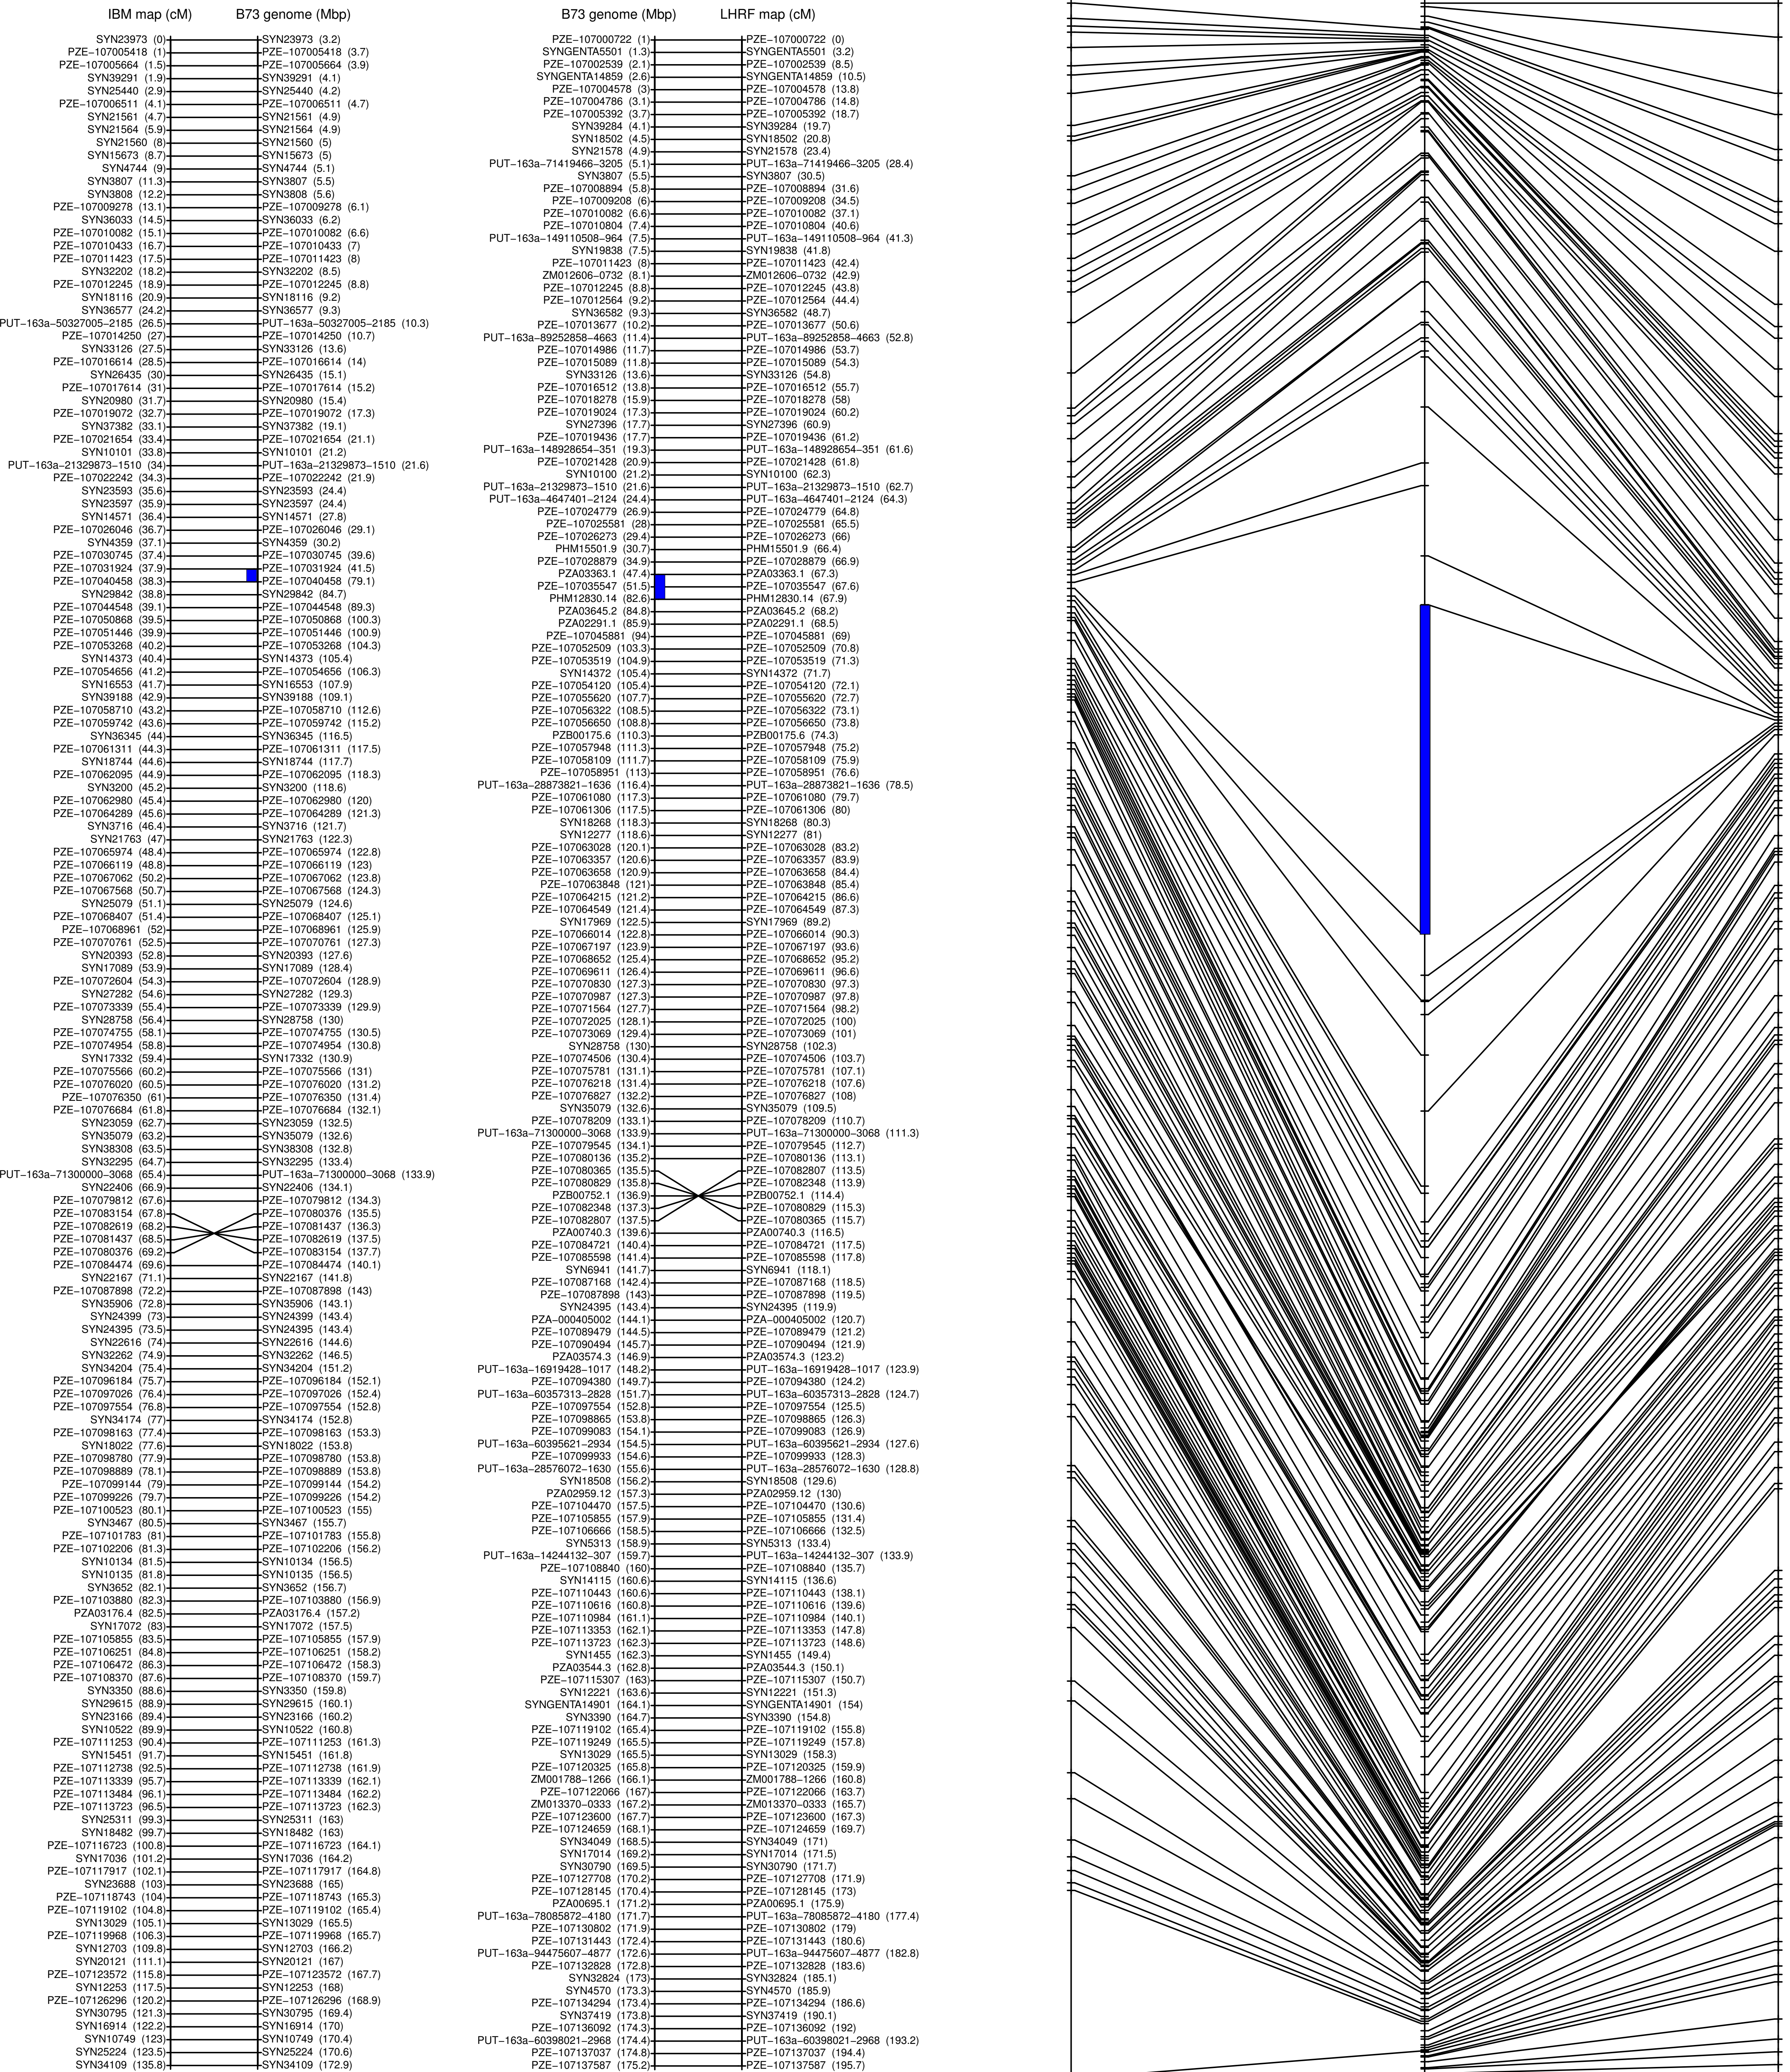

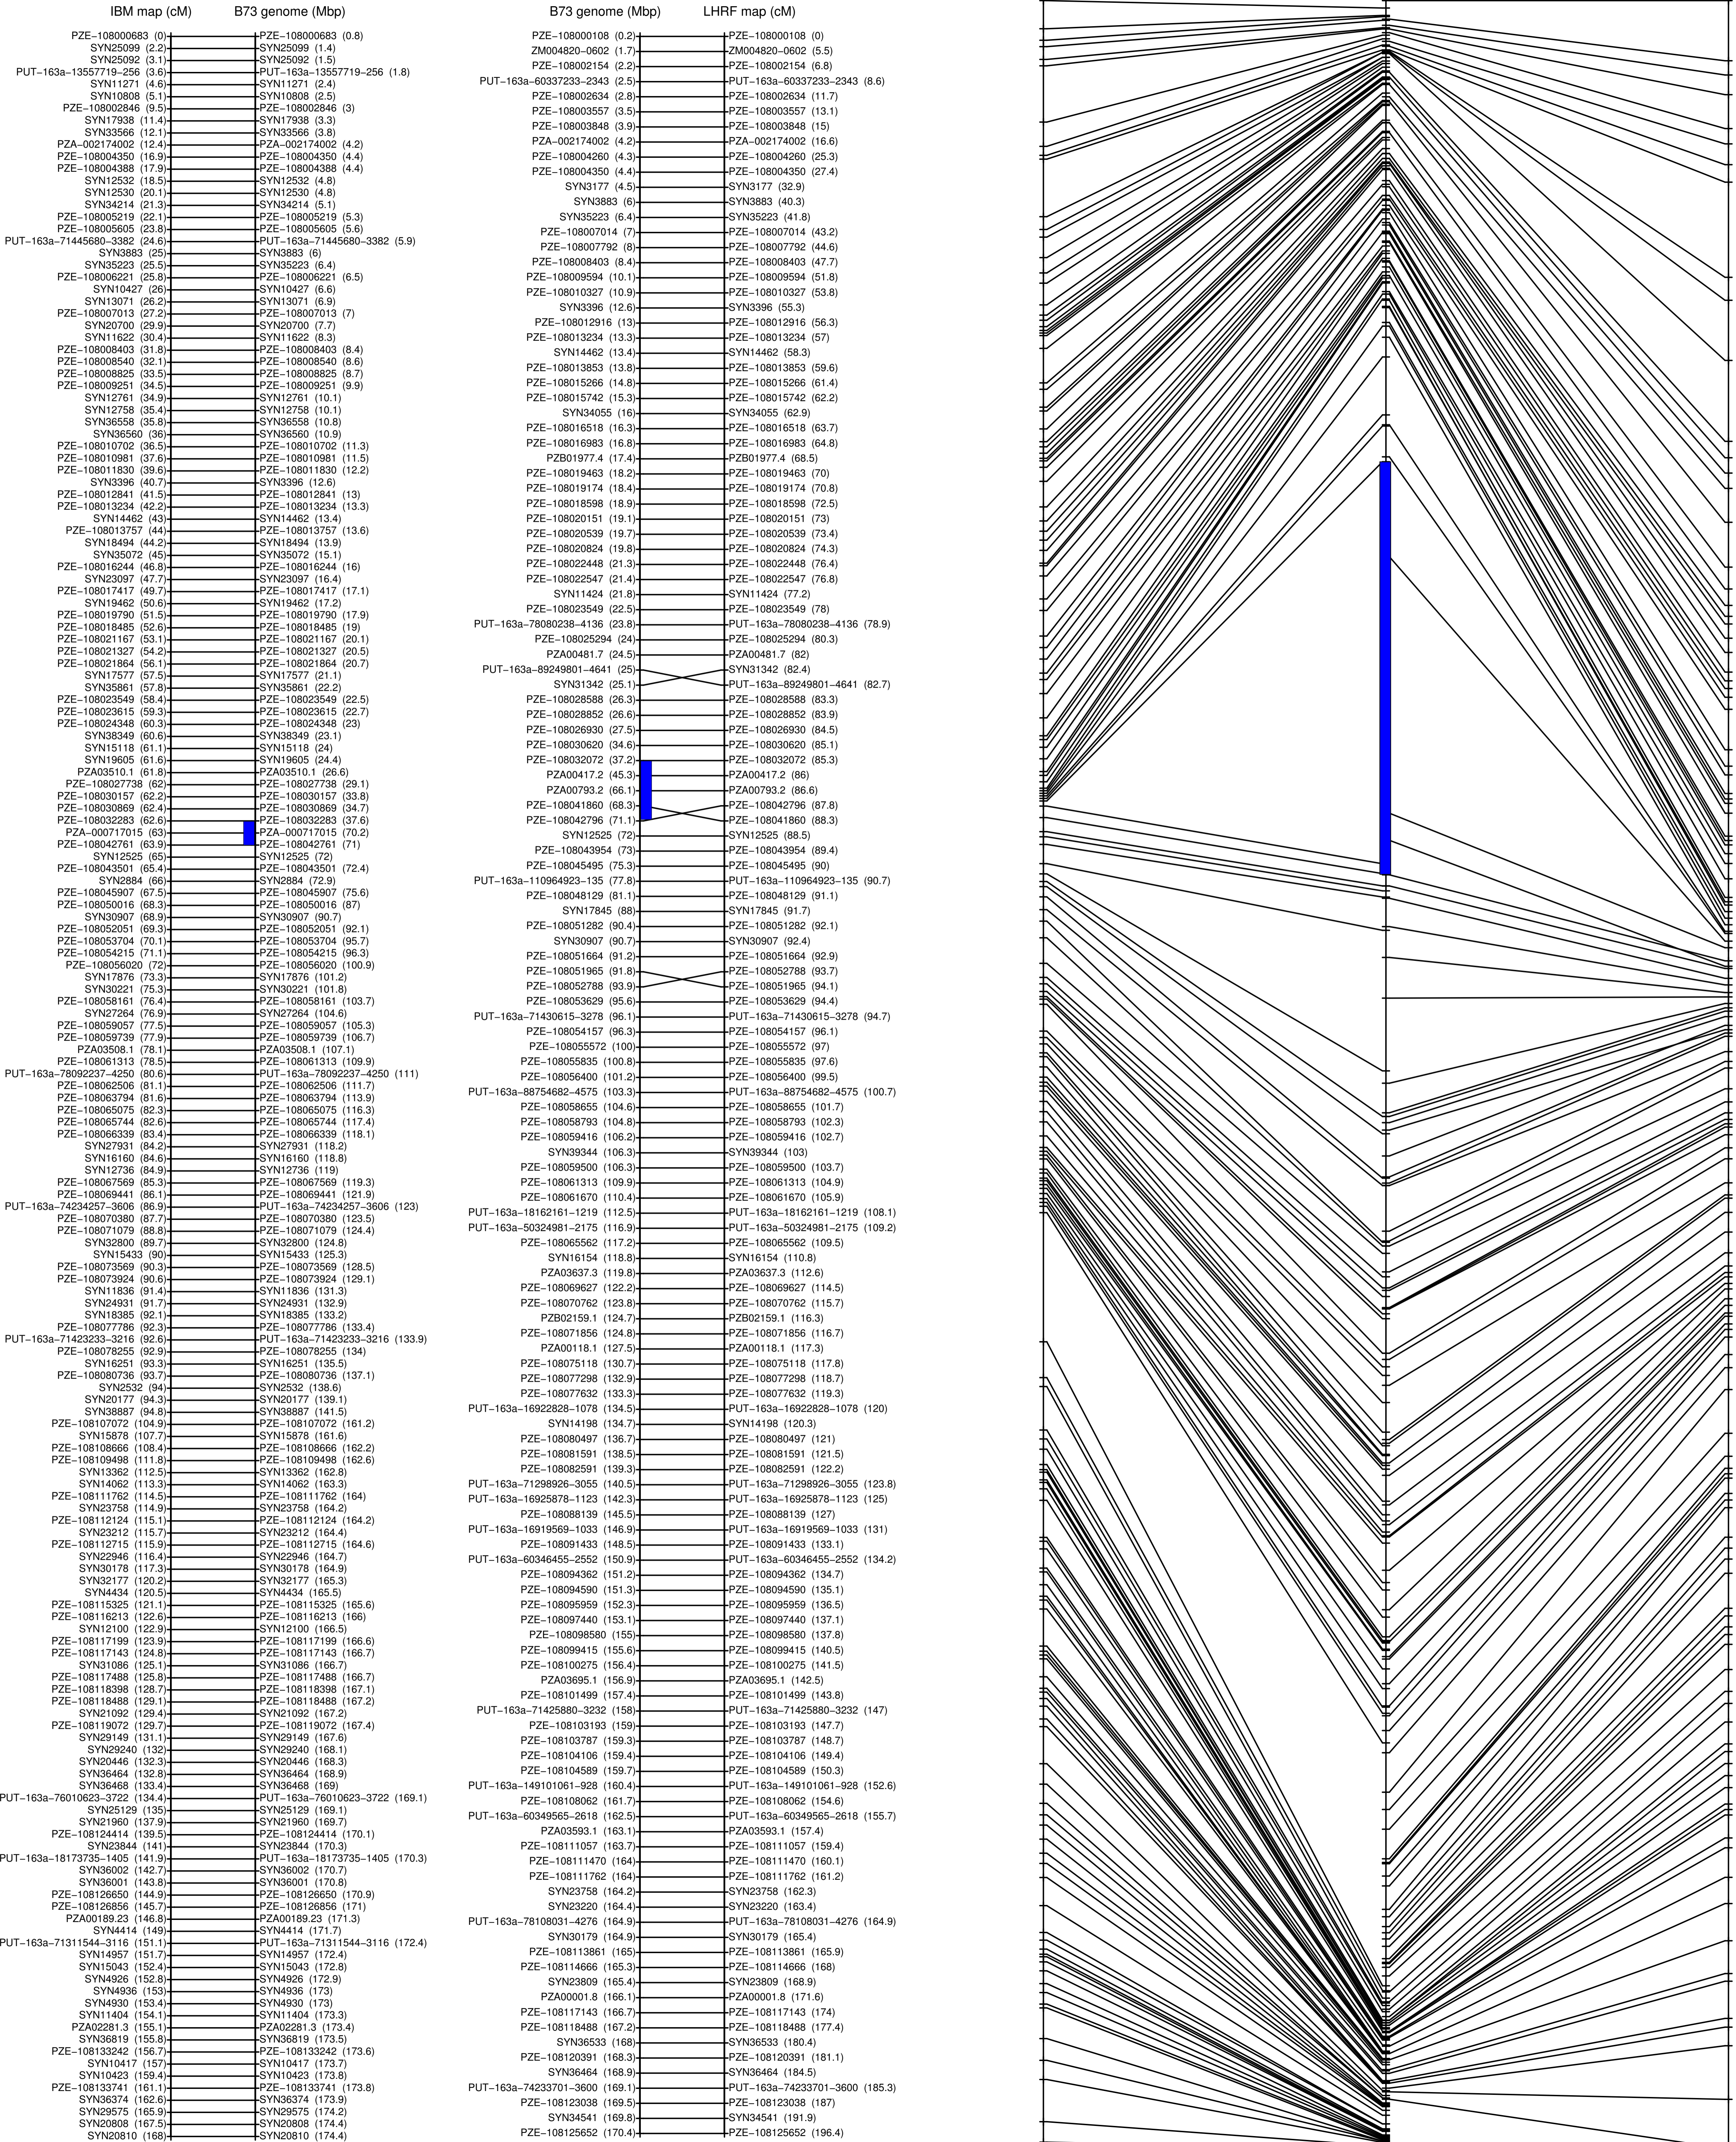



| IBM map (cM)                  | B73 genome (Mbp)              | B73 genome (Mbp)               | LHRF map (cM)                  |
|-------------------------------|-------------------------------|--------------------------------|--------------------------------|
| PZE-109000143 (0)             | PZE-109000143 (0.6)           | PZE-109000122 (0.6)            | PZE-109000122 (0)              |
| SYN21732 (2)                  | SYN21732 (1.3)                | SYN21747 (1.3)                 | SYN21747 (3.3)                 |
| PZE-109001536 (3.2)           | PZE-109001536 (2.1)           | PZE-109001669 (2.2)            | PZE-109001669 (5.3)            |
| SYN25586 (3.5)                | SYN25586 (2.2)                | PZE-109001902 (2.5)            | PZE-109001902 (6.4)            |
| SYN24557 (3.8)                | SYN24557 (2.3)                | PZE-109002005 (2.3)            | PZE-109002005 (7.1)            |
| SYN36188 (4.7)                | SYN36188 (3.1)                | PZE-109002219 (2.6)            | PZE-109002219 (8.1)            |
| PZE-109003046 (6)             | PZE-109003046 (3.7)           | PZE-109003131 (3.7)            | PZE-109003131 (11.2)           |
| PZE-109003305 (7.4)           | PZE-109003305 (3.8)           | PZE-109003647 (4.3)            | PZE-109003647 (11.9)           |
| PZE-109003659 (7.7)           | PZE-109003659 (4.3)           | PZE-109004946 (5.5)            | PZE-109004946 (14.7)           |
| PZE-109003902 (8.3)           | PZE-109003902 (4.4)           | PZE-109005409 (6)              | PZE-109005409 (17.4)           |
| SYN30861 (10)                 | SYN30861 (4.7)                | PZE-109005850 (6.5)            | PZE-109005850 (18.3)           |
| SYN35081 (14.8)               | SYN35081 (6.1)                | PZE-109006355 (7.2)            | PZE-109006355 (20.3)           |
| PZE-109006201 (17.1)          | PZE-109006201 (7.1)           | SYN32602 (7.6)                 | SYN32602 (20.8)                |
| PZE-109006992 (19.1)          | PZE-109006992 (7.8)           | PZE-109006938 (7.7)            | PZE-109006938 (21.3)           |
| SYN39069 (20.9)               | SYN39069 (8)                  | PZE-109007075 (7.9)            | PZE-109007075 (23.4)           |
| SYN39073 (21.4)               | SYN39073 (8.4)                | SYN36360 (9.4)                 | SYN36360 (27.7)                |
| SYN13447 (22.7)               | SYN13447 (8.4)                | PZE-109009220 (10)             | PZE-109009220 (28.4)           |
| SYN19752 (24.6)               | SYN19752 (8.8)                | PZE-109009836 (10.9)           | PZE-109009836 (31)             |
| SYN20011 (26.4)               | SYN20011 (9)                  | PZE-109010252 (11.2)           | PZE-109010252 (31.6)           |
| SYN36359 (27)                 | SYN36359 (9.3)                | SYNGENTA10406 (11.5)           | SYNGENTA10406 (32.6)           |
| SYN11737 (28)                 | SYN11737 (10)                 | PUT-163a-6031569-2337 (11.7)   | PUT-163a-6031569-2337 (34.2)   |
| PZE-109009392 (29.8)          | PZE-109009392 (10.3)          | PZE-109011840 (12.6)           | PZE-109011840 (36)             |
| PZE-109009763 (31.7)          | PZE-109009763 (10.8)          | SYN2755 (12.9)                 | SYN2755 (37.1)                 |
| PZE-109010476 (33.3)          | PZE-109010476 (11.4)          | PZE-109012939 (13.4)           | PZE-109012939 (40.2)           |
| SYN33212 (34)                 | SYN33212 (11.7)               | SYN35320 (13.5)                | SYN35320 (41.4)                |
| PZE-109011385 (34.8)          | PZE-109011385 (11.8)          | PZE-109013674 (13.9)           | PZE-109013674 (42.8)           |
| SYN2758 (36.8)                | SYN2758 (12.9)                | PZE-109014867 (14.8)           | PZE-109014867 (45.3)           |
| SYN18843 (37.7)               | PZE-109012555 (13)            | SYN32732 (15.6)                | SYN32732 (45.8)                |
| PZE-109012555 (38.2)          | SYN18843 (13.2)               | PUT-163a-16926106-1128 (16)    | PUT-163a-16926106-1128 (46.6)  |
| PZE-109013000 (38.6)          | PZE-109013000 (13.5)          | PZE-109016150 (16.3)           | PZE-109016150 (48.2)           |
| SYN35320 (39.8)               | SYN35320 (13.5)               | PZE-109016955 (17)             | PZE-109016955 (48.9)           |
| PZE-109013469 (40.5)          | PZE-109013469 (13.8)          | PZE-109017196 (17.3)           | PZE-109017196 (49.3)           |
| SYN12315 (41.6)               | SYN12315 (14.3)               | PZE-109017592 (17.7)           | PZE-109017592 (50)             |
| SYN11769 (43)                 | SYN11769 (14.5)               | PZE-109017768 (18.2)           | PZE-109017768 (50.7)           |
| SYN27750 (43.4)               | SYN27750 (14.8)               | PZE-109018613 (18.9)           | PZE-109018613 (53.2)           |
| PZE-109015133 (44.3)          | PZE-109015133 (15.3)          | PZE-109019740 (20.1)           | PZE-109019740 (54.6)           |
| PZE-109015314 (46)            | PZE-109015314 (15.4)          | SYN9817 (20.3)                 | SYN9817 (56.2)                 |
| PUT-163a-16926106-1129 (46.9) | PUT-163a-16926106-1129 (16)   | PZE-109021713 (22)             | PZE-109021713 (60)             |
| PZE-109016177 (48.3)          | PZE-109016177 (16.3)          | PZE-109022267 (22.5)           | PZE-109022267 (60.8)           |
| SYN16077 (50.7)               | SYN16077 (16.7)               | PZE-109022525 (23)             | PZE-109022525 (61.5)           |
| PZE-109016955 (51.7)          | PZE-109016955 (17)            | PZE-109023719 (23.8)           | PZE-109023719 (65)             |
| PZE-109017457 (52.5)          | PZE-109017457 (17.6)          | PZB01110.1 (24.1)              | PZB01110.1 (65.5)              |
| PZE-109018303 (54.6)          | PZE-109018303 (18.7)          | PZE-109023988 (24.1)           | PZE-109023988 (65.8)           |
| PZE-109018613 (55.4)          | PZE-109018613 (18.9)          | PZB01963.1 (24.5)              | PZB01963.1 (66)                |
| SYN18694 (55.7)               | SYN18694 (19.8)               | PZA02648.2 (25.7)              | PZA02648.2 (67.5)              |
| PZE-109019686 (56.1)          | PZE-109019686 (20.1)          | SYN34139 (26.6)                | SYN34139 (68.2)                |
| SYN29881 (58.9)               | SYN29881 (20.8)               | PZB00379.3 (26.7)              | PZB00379.3 (68.7)              |
| SYN15749 (60.1)               | SYN15749 (21)                 | PZE-109026962 (26.9)           | PZE-109026962 (69.8)           |
| PZE-109021713 (61)            | PZE-109021713 (22)            | PZE-109027261 (27.2)           | PZE-109027261 (70.8)           |
| PZE-109022427 (61.3)          | PZE-109022427 (22.8)          | PZE-109027834 (28.6)           | PZE-109027834 (71)             |
| SYN34183 (62.4)               | SYN34183 (23.7)               | PUT-163a-101398342-33 (49.2)   | PUT-163a-101398342-33 (71.6)   |
| PZB01963.1 (62.9)             | PZB01963.1 (24.5)             | PZE-109039951 (60.1)           | PZE-109040053 (72)             |
| SYN28207 (64.2)               | SYN28207 (25.3)               | PZE-109040053 (60.4)           | PZE-109039951 (72.4)           |
| SYN34135 (64.6)               | SYN34135 (26.6)               | PZE-109044048 (74.6)           | PZE-109044048 (73)             |
| SYN34141 (64.9)               | SYN34141 (26.6)               | PZA01791.2 (81)                | PZA01791.2 (73.6)              |
| PZE-109026940 (65.5)          | PZE-109026940 (26.9)          | PUT-163a-76289682-3927 (87.3)  | PUT-163a-76289682-3927 (74)    |
| PZE-109027147 (65.8)          | PZE-109027147 (27.1)          | PZE-109050456 (87.8)           | PZE-109050456 (74.5)           |
| PZE-109027723 (66)            | PZE-109027723 (28.4)          | PZE-109051241 (88.7)           | PZE-109051241 (75.2)           |
| PZE-109029553 (66.6)          | PZE-109029553 (32.3)          | PZE-109052817 (91.3)           | SYN25681 (76.1)                |
| PZE-109035852 (66.8)          | PZE-109035852 (47.1)          | SYN25681 (92.7)                | PZE-109052817 (76.6)           |
| PZE-109037900 (67.1)          | PZE-109037900 (55.5)          | PZE-109054300 (94)             | PZE-109054300 (77.1)           |
| PZE-109047031 (67.3)          | PZE-109047031 (81.2)          | PZE-109054978 (95.6)           | PZE-109054978 (77.9)           |
| SYN38486 (67.9)               | SYN38486 (87.6)               | PZE-109055752 (96.4)           | PZE-109055752 (79)             |
| PZE-109051446 (68.1)          | PZE-109051446 (88.9)          | PZA02897.12 (97.2)             | PZA02897.12 (79.8)             |
| PZE-109051855 (68.4)          | PZE-109051855 (89.6)          | PZE-109056895 (97.8)           | PZE-109056895 (80.2)           |
| PZE-109054975 (68.8)          | PZE-109054975 (95.6)          | PZE-109058460 (99.8)           | PZE-109058460 (82.3)           |
| PZE-109055553 (70.1)          | PZE-109055553 (96.2)          | PZE-109058617 (100.1)          | PZE-109058460 (82.8)           |
| PZE-109057545 (71.1)          | PZE-109057545 (98.7)          | SYN32233 (100.3)               | PZE-109059665 (83.3)           |
| PZE-109058129 (71.7)          | PZE-109058129 (99.4)          | PZE-109059665 (101.3)          | SYN32233 (83.8)                |
| PZE-109060496 (72.2)          | PZE-109060496 (102.1)         | PZE-109060695 (102.4)          | PZE-109060695 (84.8)           |
| SYN37647 (72.9)               | SYN37647 (105.1)              | PZE-109063133 (105.4)          | PZE-109063133 (85.6)           |
| SYN37617 (73.4)               | SYN37617 (105.4)              | PZE-109064318 (107.5)          | PZE-109064318 (87.6)           |
| SYN36472 (73.7)               | SYN36472 (105.8)              | SYN35518 (107.8)               | SYN35518 (88.1)                |
| PZE-109064332 (74)            | PZE-109064332 (107.4)         | PZE-109064888 (108)            | PZE-109064888 (88.6)           |
| PZE-109064885 (74.3)          | PZE-109064885 (108)           | PUT-163a-5739922-2298 (108.7)  | PUT-163a-5739922-2298 (90.6)   |
| PZE-109066337 (74.9)          | PZE-109066337 (109.3)         | PZE-109065969 (109.1)          | PZE-109065969 (91.1)           |
| SYN21230 (76)                 | SYN21230 (110.3)              | PZE-109066607 (109.6)          | PZE-109066607 (91.7)           |
| PZE-100001123 (76.2)          | PZE-100003716573 (111.1)      | PZE-109066607 (111.1)          | PZE-100001123 (92.4)           |
| PZE-100003716573 (76.4)       | PZE-100001123 (111.3)         | PZE-100003695226 (111.1)       | PZE-100003695226 (94.5)        |
| PZE-109068561 (77)            | PZE-109068561 (112.8)         | PZE-100001123 (111.3)          | PZE-109067632 (96.3)           |
| PZE-109069697 (77.2)          | PZE-109069697 (113.8)         | PUT-163a-78075531-4099 (112.1) | PUT-163a-78075531-4099 (97.5)  |
| SYN18130 (78.2)               | SYN18130 (114.1)              | PZA03468.1 (113.7)             | PZA03468.1 (98)                |
| SYN29013 (78.9)               | SYN29013 (117.3)              | SYN18132 (114.2)               | SYN18132 (98.3)                |
| PZE-109073134 (79.7)          | PZE-109073134 (118.3)         | PZB01867.2 (115.5)             | PZB01867.2 (98.6)              |
| SYN27246 (80.5)               | SYN27246 (119.7)              | PZE-109071550 (116.3)          | PZE-109071550 (99.2)           |
| SYN22541 (80.8)               | SYN22541 (120.3)              | PZE-109073072 (118.1)          | PZE-109073072 (100.2)          |
| SYN4637 (81)                  | SYN4637 (121.6)               | PZE-109073134 (118.3)          | PZE-109073134 (100.6)          |
| SYN14344 (81.7)               | SYN14344 (123.2)              | PZE-109073543 (118.9)          | PZE-109073543 (100.8)          |
| PZE-109077509 (82)            | PZE-109077509 (125)           | SYN27246 (119.7)               | SYN27246 (101.3)               |
| PZE-109078597 (83.5)          | PZE-109078597 (126.7)         | PUT-163a-60342651-2460 (122.2) | PUT-163a-60342651-2460 (102.2) |
| PZE-109079358 (84)            | PZE-109079358 (127.4)         | PZE-109075943 (122.9)          | PZE-109075943 (102.5)          |
| SYN24353 (84.5)               | SYN24353 (128.2)              | PZE-109076558 (123.8)          | PZE-109076558 (103)            |
| SYN12671 (85)                 | SYN12671 (129)                | PZE-109077330 (124.8)          | PZE-109077330 (104.7)          |
| SYN3443 (85.5)                | SYN3443 (130.5)               | PZE-109077933 (125.6)          | PZE-109077933 (105.7)          |
| PZE-109082594 (85.9)          | PZE-109082594 (131.2)         | PZE-109078393 (126.3)          | PZE-109078393 (106.4)          |
| PZA01866.1 (88)               | PZA01866.1 (133.9)            | PZE-109078789 (126.9)          | PZE-109078789 (107.4)          |
| PZE-109085093 (88.3)          | PZE-109085093 (133.9)         | SYN23643 (127.5)               | SYN23643 (107.8)               |
| PZE-109085594 (88.6)          | PZE-109085594 (134.3)         | PUT-163a-16926216-1141 (128.2) | PUT-163a-16926216-1141 (108.4) |
| PZE-109086097 (89)            | PZE-109086097 (134.6)         | PZE-109080559 (128.6)          | PZE-109080559 (109)            |
| SYN38163 (89.4)               | SYN38163 (135.9)              | PZE-109080751 (128.7)          | PZE-109080751 (109.3)          |
| SYN38160 (89.8)               | SYN38160 (135.9)              | PUT-163a-60357793-2838 (129.2) | PUT-163a-60357793-2838 (109.9) |
| PZE-109087484 (90.2)          | PZE-109087484 (136.1)         | PZE-109081422 (129.7)          | PZE-109081422 (110.2)          |
| SYN31610 (90.9)               | SYN31610 (136.2)              | PZE-109082918 (131.6)          | PZE-109082918 (111)            |
| PZE-109088452 (91.2)          | PZE-109088452 (136.8)         | PZA01866.1 (133.9)             | PZA01866.1 (113.2)             |
| SYN24722 (91.9)               | SYN24722 (137.1)              | PZE-109086287 (134.8)          | PZE-109086287 (115.4)          |
| PZE-109089873 (92.6)          | PZE-109089873 (137.8)         | PZE-109087395 (136)            | PZE-109087395 (116.9)          |
| PZE-109091377 (94.5)          | PZE-109091377 (138.7)         | SYN22080 (136.9)               | SYN22080 (117.9)               |
| SYN4010 (95.4)                | SYN4010 (138.9)               | SYN26337 (137.3)               | SYN26337 (119.1)               |
| PZE-109093491 (98)            | PZE-109093491 (140)           | PZE-109089934 (137.8)          | PZE-109089934 (120.1)          |
| SYN12940 (98.4)               | SYN12940 (140.3)              | PZE-109091272 (138.7)          | PZE-109091272 (122)            |
| SYN32361 (99.1)               | SYN32361 (140.8)              | SYN4010 (138.9)                | SYN4010 (124)                  |
| SYN11597 (100.7)              | SYN11597 (141.5)              | PZE-109091985 (139)            | PZE-109091985 (124.4)          |
| SYN11596 (101)                | SYN11596 (141.5)              | PZE-109093491 (140)            | PZE-109093491 (127.5)          |
| SYN26727 (102.1)              | SYN26727 (141.8)              | PZE-109094881 (141.3)          | PZE-109094881 (128.2)          |
| SYN16109 (102.4)              | SYN16109 (141.9)              | PZE-109095469 (141.5)          | PZE-109095469 (129)            |
| SYN23501 (102.8)              | SYN23501 (142.5)              | SYN22829 (141.9)               | SYN22829 (130.3)               |
| PZE-109097202 (103.4)         | PZE-109097202 (142.8)         | SYN16112 (142)                 | SYN16112 (130.8)               |
| SYN30940 (104.7)              | SYN30940 (142.9)              | PZE-109097083 (142.7)          | PZE-109097083 (132.3)          |
| PZE-109098496 (106.9)         | PZE-109098496 (143.4)         | PZE-109097654 (142.9)          | PZE-109097654 (135.4)          |
| SYN27712 (107.7)              | SYN27712 (143.9)              | PZE-109098921 (143.9)          | PZE-109098921 (137.7)          |
| SYN27711 (108)                | SYN27711 (143.9)              | SYN25122 (145.4)               | SYN25122 (143.8)               |
| SYN22241 (109.9)              | SYN22241 (144.8)              | PUT-163a-88750800-4538 (146.3) | PUT-163a-88750800-4538 (146.2) |
| PZE-109100755 (110.5)         | PZE-109100755 (145)           | SYN30119 (146.5)               | SYN30119 (146.9)               |
| SYN25124 (111.9)              | SYN25124 (145.4)              | PZE-109103504 (146.8)          | PZE-109103504 (148.5)          |
| PZE-109102157 (112.2)         | PZE-109102157 (146.2)         | PZA00323.3 (146.9)             | PZA00323.3 (149.2)             |
| SYN30124 (114.5)              | SYN30124 (146.5)              | SYN26903 (147.5)               | SYN26903 (150.2)               |
| PZE-109102962 (115.6)         | PZE-109102962 (146.5)         | SYN10260 (147.7)               | SYN10260 (153.3)               |
| PZA02197.1 (117)              | PZA02197.1 (146.9)            | PZE-109106296 (148.2)          | PZE-109106296 (154.2)          |
| SYN26894 (117.5)              | SYN26894 (147.5)              | PZE-109106589 (148.4)          | PZE-109106589 (154.9)          |
| SYN10263 (119.2)              | SYN10263 (147.8)              | PZE-109106846 (148.7)          | PZE-109106846 (155.2)          |
| PZE-109106186 (119.9)         | PZE-109106186 (148.1)         | PZE-109107497 (149.1)          | PZE-109107497 (156.3)          |
| PZE-109107497 (120.7)         | PZE-109107497 (149.1)         | SYN26497 (149.3)               | SYN26497 (156.9)               |
| PZE-109108255 (121.6)         | PZE-109108255 (149.5)         | PZE-109108944 (149.7)          | PZE-109108944 (160.8)          |
| PZE-109109275 (125.8)         | PZE-109109275 (149.9)         | PZE-109100002 (150.8)          | PZE-109100002 (162.2)          |
| PZE-109109692 (127.8)         | PZE-109109692 (150.4)         | PZE-109110614 (151.1)          | PZE-109110614 (164.7)          |
| PZE-109109991 (128.8)         | PZE-109109991 (150.8)         | SYN7109 (151.3)                | SYN7109 (165.5)                |
| PZE-109110253 (129.9)         | PZE-109110253 (150.9)         | SYN35714 (151.5)               | SYN35714 (166.4)               |
| SYN5447 (130.9)               | SYN5447 (151.2)               | PZE-109112955 (151.7)          | PZE-109112955 (166.8)          |
| PZE-109111133 (133.5)         | PZE-109111133 (151.3)         | PZE-109113590 (151.8)          | PZE-109113590 (168.6)          |
| SYN35714 (135.3)              | SYN35714 (151.5)              | PUT-163a-4621424-2088 (136.4)  | PUT-163a-4621424-2088 (151.7)  |
| PUT-163a-4621424-2088 (136.4) | PUT-163a-4621424-2088 (151.7) | PZE-109113507 (137)            | PZE-109113507 (151.8)          |
| PZE-109113507 (137)           | PZE-109113507 (151.8)         | SYN10591 (152)                 | SYN10591 (169.9)               |
| SYN10591 (138.8)              | SYN10591 (152)                | PUT-163a-50                    |                                |

| IBM map (cM)                   | B73 genome (Mbp)               | B73 genome (Mbp)               | LHRF map (cM)                 |
|--------------------------------|--------------------------------|--------------------------------|-------------------------------|
| SYN17514 (0)                   | SYN17514 (1.1)                 | SYN17109 (4)                   | SYN17109 (0)                  |
| SYN16185 (1.8)                 | SYN16185 (2)                   | SYN4482 (4.6)                  | SYN4482 (3.8)                 |
| SYN16805 (3.8)                 | SYN16805 (2.3)                 | SYN17783 (4.9)                 | SYN17783 (9.5)                |
| SYN17621 (4.3)                 | SYN17621 (2.4)                 | PZA02095.10 (5.6)              | PZA02095.10 (12.3)            |
| SYN12396 (5.7)                 | SYN12396 (2.7)                 | PZE-110008028 (6.1)            | PZE-110008028 (14.2)          |
| SYN12401 (8.3)                 | SYN12401 (2.8)                 | PZE-110008833 (6.5)            | PZE-110008833 (16.4)          |
| SYN16617 (8.6)                 | SYN16617 (3.2)                 | PZE-110009032 (7.1)            | PZE-110009032 (18.3)          |
| SYN17105 (10.7)                | SYN17105 (4)                   | PZE-110009225 (7.1)            | PZE-110009225 (19.7)          |
| SYN14833 (12.3)                | SYN14833 (4.5)                 | PZE-110009334 (7.2)            | PZE-110009334 (20.2)          |
| SYN4482 (13.1)                 | SYN4482 (4.6)                  | PZE-110010396 (8.9)            | PZE-110010396 (22)            |
| SYN4471 (14.6)                 | SYN4471 (4.7)                  | PZB01301.6 (10.2)              | PZB01301.6 (24.3)             |
| SYN4484 (15.4)                 | SYN4484 (4.7)                  | PUT-163a-71767261-3524 (10.4)  | PUT-163a-71767261-3524 (24.8) |
| SYN17783 (18.2)                | SYN17783 (4.9)                 | PHM15331.16 (10.9)             | PHM15331.16 (25.6)            |
| SYN16720 (21.7)                | SYN16720 (5.9)                 | SYN18994 (12.7)                | SYN18994 (27.4)               |
| PZE-110009032 (27.9)           | PZE-110009032 (7.1)            | PUT-163a-71758789-3424 (13.5)  | PUT-163a-71758789-3424 (28.1) |
| PZE-110009334 (29.8)           | PZE-110009334 (7.2)            | PZE-110014694 (14)             | PZE-110014694 (28.8)          |
| PZE-110009907 (30.1)           | PZE-110009907 (8.4)            | PZE-110014871 (14.4)           | PZE-110014871 (29.4)          |
| SYN17272 (30.4)                | SYN17272 (8.9)                 | PZE-110015359 (14.9)           | PZE-110015359 (30.9)          |
| PZE-110010846 (30.6)           | PZE-110010846 (9.5)            | PHM3922.32 (17.7)              | PHM3922.32 (31.8)             |
| SYN23776 (32)                  | SYN23776 (9.9)                 | PUT-163a-78086732-4196 (20.4)  | PUT-163a-78086732-4196 (32.3) |
| SYN17564 (32.6)                | SYN17564 (10.6)                | PZE-110018270 (21.7)           | PZE-110018270 (32.8)          |
| PZE-110012285 (33.5)           | PZE-110012285 (10.7)           | SYN26652 (22.3)                | SYN26652 (33)                 |
| PZE-110013051 (34.7)           | PZE-110013051 (11.7)           | SYN26634 (22.4)                | SYN26634 (33.4)               |
| PZE-110014547 (35.4)           | PZE-110014547 (13.8)           | PUT-163a-110518051-97 (23.2)   | PUT-163a-110518051-97 (33.8)  |
| PZE-110014718 (36.1)           | PZE-110014718 (14.1)           | PZE-110020065 (25.3)           | PZE-110020065 (35)            |
| PZE-110015042 (36.6)           | PZE-110015042 (14.6)           | PUT-163a-110516422-93 (29.9)   | PUT-163a-110516422-93 (35.4)  |
| PZE-110015184 (36.8)           | PZE-110015184 (14.8)           | PZE-110025113 (55.8)           | PZE-110025113 (35.8)          |
| PZE-110016084 (37.1)           | PZE-110016084 (16.4)           | PZE-110025413 (57.3)           | PZE-110025413 (36.2)          |
| PZE-110016291 (38)             | PZE-110016291 (16.6)           | PUT-163a-13177814-171 (70.3)   | PUT-163a-13177814-171 (36.6)  |
| PZE-110019712 (39.2)           | PZE-110019712 (24.7)           | PZE-110038481 (73.6)           | PZE-110038481 (37)            |
| PZE-110020197 (40.3)           | PZE-110020197 (25.6)           | SYN22037 (76.6)                | SYN22037 (38.1)               |
| PZA03342.2 (41.1)              | PZA03342.2 (59.9)              | PZE-110040063 (77.2)           | PZE-110040063 (39)            |
| PZE-110033293 (41.7)           | PZE-110033293 (62.7)           | PZE-110040221 (77.3)           | PZE-110040221 (41.4)          |
| PZE-110036826 (42.3)           | PZE-110036826 (70.3)           | PZE-110040541 (77.4)           | PZE-110040541 (42.8)          |
| PZE-110039284 (42.8)           | PZE-110039284 (75.7)           | PZE-110041758 (79.9)           | PZE-110041758 (43.7)          |
| PZE-110039831 (43.1)           | PZE-110039831 (76.9)           | PZE-110042016 (80.1)           | PZE-110042016 (44)            |
| PZE-110040193 (43.5)           | PZE-110040193 (77.3)           | PZE-110043055 (82.1)           | PZE-110043055 (44.2)          |
| PZE-110042215 (44.3)           | PZE-110042215 (80.6)           | PZE-110044004 (83.7)           | PZE-110044004 (44.7)          |
| PZE-110042705 (44.5)           | PZE-110042705 (81.2)           | SYN8173 (85.2)                 | SYN8173 (44.9)                |
| SYN11547 (44.8)                | SYN11547 (83.5)                | PZE-110044817 (85.3)           | PZE-110044817 (45.2)          |
| PZE-110044190 (46.2)           | PZE-110044190 (84.1)           | PZE-110046358 (87.2)           | PZE-110046358 (47.2)          |
| PZE-110044891 (46.8)           | PZE-110044891 (85.3)           | PZE-110047212 (88.4)           | PZE-110047212 (48.6)          |
| PZE-110048720 (47.4)           | PZE-110048720 (91.4)           | PZE-110049100 (92)             | SYN4166 (49.2)                |
| SYN23779 (47.8)                | SYN23779 (95.2)                | SYN4166 (92)                   | PZE-110049100 (49.5)          |
| PZE-110052325 (48)             | PZE-110052325 (98.9)           | PZE-110049940 (94.1)           | PZE-110049940 (50.1)          |
| SYN15824 (49)                  | SYN15824 (99.8)                | PZE-110050295 (95)             | PZE-110050295 (50.7)          |
| PUT-163a-89249339-4631 (49.8)  | PUT-163a-89249339-4631 (108.4) | PZE-110050659 (95.4)           | PZE-110050659 (51.1)          |
| SYN1116 (50.6)                 | SYN1116 (113.2)                | PZE-110052085 (98.4)           | PZE-110052085 (51.5)          |
| SYN16793 (51)                  | SYN16793 (113.7)               | PZE-110052763 (99.6)           | PZE-110052763 (51.7)          |
| PZE-110060779 (51.2)           | PZE-110060779 (115.1)          | PZA03585.1 (105)               | PZA03585.1 (52.3)             |
| PZE-110061725 (51.4)           | PZE-110061725 (116.9)          | PUT-163a-89249339-4630 (108.4) | PUT-163a-89249339-4630 (52.7) |
| PZE-110062653 (51.8)           | PZE-110062653 (117.7)          | PZA01292.1 (109.8)             | PZA01292.1 (53.3)             |
| PZE-110064395 (52.3)           | PZE-110064395 (120)            | SYN19553 (109.9)               | SYN19553 (53.7)               |
| SYN30375 (53)                  | SYN30375 (121.5)               | PZE-110058323 (112.2)          | PZE-110058323 (54.3)          |
| SYN23939 (53.3)                | SYN23939 (123.6)               | PZE-110058964 (113.2)          | PZE-110058964 (57.1)          |
| SYN22810 (53.8)                | SYN22810 (124.2)               | PZB02237.1 (114.3)             | PZB02237.1 (57.8)             |
| PZE-110069835 (54.2)           | PZE-110069835 (126.9)          | PZE-110060456 (114.8)          | PZE-110060456 (58.1)          |
| SYN18871 (55.4)                | SYN18871 (127.3)               | PZE-110061523 (116.5)          | PZE-110061523 (58.4)          |
| PZE-110070914 (55.9)           | PZE-110070914 (127.4)          | PZE-110061629 (116.8)          | PZE-110061629 (58.8)          |
| SYN17536 (56.2)                | SYN17536 (129.5)               | PZE-110062213 (117.5)          | PZE-110062213 (59.7)          |
| PZE-110073500 (56.4)           | PZE-110073500 (130.2)          | PHM13687.14 (118)              | PHM13687.14 (60.6)            |
| PZE-110073743 (57)             | PZE-110073743 (130.3)          | PZE-110065112 (120.8)          | PZE-110065112 (61.1)          |
| PZE-110074757 (58.2)           | PZE-110074757 (131)            | SYN27054 (122.3)               | SYN27054 (62.2)               |
| SYN4216 (59)                   | SYN4216 (132.1)                | PUT-163a-148967626-626 (123.2) | PUT-163a-148967626-626 (63.3) |
| PZE-110076741 (60.1)           | PZE-110076741 (132.5)          | PUT-163a-16921481-1061 (124.1) | PUT-163a-16921481-1061 (64)   |
| SYN36342 (60.5)                | SYN36342 (132.9)               | PZE-110068820 (125.7)          | PZE-110068820 (64.5)          |
| PZE-11007785 (60.8)            | PZE-11007785 (133.1)           | PZE-110070282 (127.3)          | PZE-110070282 (66.2)          |
| PZE-110078631 (61.2)           | PZE-110078631 (133.4)          | PZE-110070863 (127.4)          | PZE-110070863 (66.8)          |
| SYN4826 (63.7)                 | SYN4826 (134.7)                | PZE-110072497 (129)            | PZE-110072497 (68)            |
| PZE-110082048 (66.3)           | PZE-110082048 (135.3)          | PZE-110073579 (130.3)          | PZE-110073579 (69.1)          |
| PZE-110082557 (66.6)           | PZE-110082557 (135.7)          | PZE-110073807 (130.3)          | PZE-110073807 (69.7)          |
| SYN18730 (67.6)                | SYN18730 (135.9)               | PZE-110073934 (130.4)          | PZE-110073934 (70.2)          |
| PZA-001456002 (68.3)           | PZA-001456002 (136.3)          | PZE-110075161 (131.9)          | PZE-110075161 (72.1)          |
| PZE-110084754 (68.9)           | PZE-110084754 (136.7)          | SYN22958 (132.5)               | SYN22958 (73.3)               |
| SYN28385 (70.7)                | SYN28385 (137.2)               | PZE-110077785 (133.1)          | PZE-110077785 (74.4)          |
| PZE-110085763 (71.1)           | PZE-110085763 (137.3)          | PZE-110078631 (133.4)          | PZE-110078631 (75.9)          |
| SYN30303 (71.6)                | SYN30303 (137.5)               | PZE-110079903 (134.2)          | PZE-110079903 (76.9)          |
| PZE-110086343 (71.8)           | PZE-110086343 (137.5)          | SYN18728 (135.9)               | SYN18728 (78.9)               |
| SYN18456 (72.2)                | SYN18456 (138)                 | PZE-110084185 (136.4)          | PZE-110084185 (79.7)          |
| PUT-163a-88747784-4527 (72.6)  | PUT-163a-88747784-4527 (138.2) | PZE-110084754 (136.7)          | PZE-110084754 (80.8)          |
| SYN21905 (73.4)                | SYN21905 (138.2)               | PZE-110085296 (137.1)          | PZE-110085296 (81.3)          |
| PZE-110088311 (73.8)           | PZE-110088311 (138.7)          | PZE-110085688 (137.3)          | PZE-110085688 (81.7)          |
| PZE-110089201 (77.2)           | PZE-110089201 (139.1)          | PZE-110086687 (137.7)          | PZE-110086687 (82.8)          |
| PZE-110090887 (78)             | PZE-110090887 (140)            | SYN18455 (138)                 | SYN18455 (83.4)               |
| SYN13120 (78.9)                | SYN13120 (141)                 | SYN37370 (140)                 | SYN37370 (91.3)               |
| PZE-110092089 (79.3)           | PZE-110092089 (141)            | PZE-110091181 (140.3)          | PZE-110091181 (93.1)          |
| PZE-110093416 (80.8)           | PZE-110093416 (141.4)          | SYN13120 (141)                 | SYN13120 (94.4)               |
| SYN38150 (81.1)                | SYN38150 (141.4)               | PZE-110091989 (141)            | PZE-110091989 (94.9)          |
| SYN36714 (82.5)                | SYN36714 (141.6)               | SYN9682 (142.1)                | SYN9682 (98.3)                |
| SYN16965 (83.7)                | SYN16965 (141.8)               | PZE-110095199 (142.2)          | PZE-110095199 (99.3)          |
| SYN24308 (84.3)                | SYN24308 (142.2)               | SYN650 (143.4)                 | SYN650 (104.8)                |
| SYN1018 (86)                   | SYN1018 (142.7)                | SYN15700 (144.4)               | SYN15700 (106.3)              |
| PUT-163a-29544531-1779 (87.3)  | PUT-163a-29544531-1779 (142.8) | PZE-110099681 (144.7)          | PZE-110099681 (107.1)         |
| PZE-110097359 (90.5)           | PZE-110097359 (143.2)          | PZE-110100655 (145)            | PZE-110100655 (109.3)         |
| SYN6070 (92.1)                 | SYN6070 (143.5)                | SYNGENTA1862 (145.3)           | SYNGENTA1862 (111.5)          |
| SYN4350 (93.4)                 | SYN4350 (144.1)                | SYN8538 (145.5)                | SYN8538 (113.3)               |
| PZE-110099681 (94.7)           | PZE-110099681 (144.7)          | PZE-110102934 (146)            | PZE-110102934 (114)           |
| PZE-110100685 (96.6)           | PZE-110100685 (145)            | PZE-110103696 (146.3)          | PZE-110103696 (117.5)         |
| PZE-110101412 (98.4)           | PZE-110101412 (145.2)          | PUT-163a-101396692-29 (147)    | PUT-163a-101396692-29 (120.6) |
| SYN11610 (100.4)               | SYN11610 (145.6)               | SYN22567 (147.2)               | SYN22567 (122.1)              |
| PZE-110102934 (101.1)          | PZE-110102934 (146)            | PZE-110106461 (147.4)          | PZE-110106461 (123.9)         |
| SYN15271 (101.4)               | SYN15271 (146.1)               | SYN19279 (147.8)               | SYN19279 (125.5)              |
| SYN12666 (105.3)               | SYN12666 (146.2)               | SYN19774 (148.1)               | SYN19774 (128.6)              |
| SYN19616 (106.8)               | SYN19616 (146.6)               | PZE-110109218 (148.4)          | PZE-110109218 (129.6)         |
| SYN35585 (108.5)               | SYN35585 (147)                 | PZE-110109364 (148.5)          | PZE-110109364 (131.2)         |
| PZE-110105598 (110.3)          | PZE-110105598 (147.1)          | SYN10867 (119.7)               | SYN10867 (148.6)              |
| SYN22560 (111.5)               | SYN22560 (147.2)               | SYN13564 (121.6)               | SYN13564 (148.9)              |
| PZE-110106108 (111.9)          | PZE-110106108 (147.3)          | PUT-163a-149071204-827 (122.5) | PUT-163a-149071204-827 (149)  |
| SYN19213 (112.3)               | SYN19213 (147.6)               |                                |                               |
| SYN19209 (113.6)               | SYN19209 (147.6)               |                                |                               |
| SYN19279 (114.5)               | SYN19279 (147.8)               |                                |                               |
| SYN19290 (115.9)               | SYN19290 (147.9)               |                                |                               |
| SYN19286 (116.8)               | SYN19286 (147.9)               |                                |                               |
| PZE-110109364 (118.9)          | PZE-110109364 (148.5)          |                                |                               |
| SYN10867 (119.7)               | SYN10867 (148.6)               |                                |                               |
| SYN13564 (121.6)               | SYN13564 (148.9)               |                                |                               |
| PUT-163a-149071204-827 (122.5) | PUT-163a-149071204-827 (149)   |                                |                               |

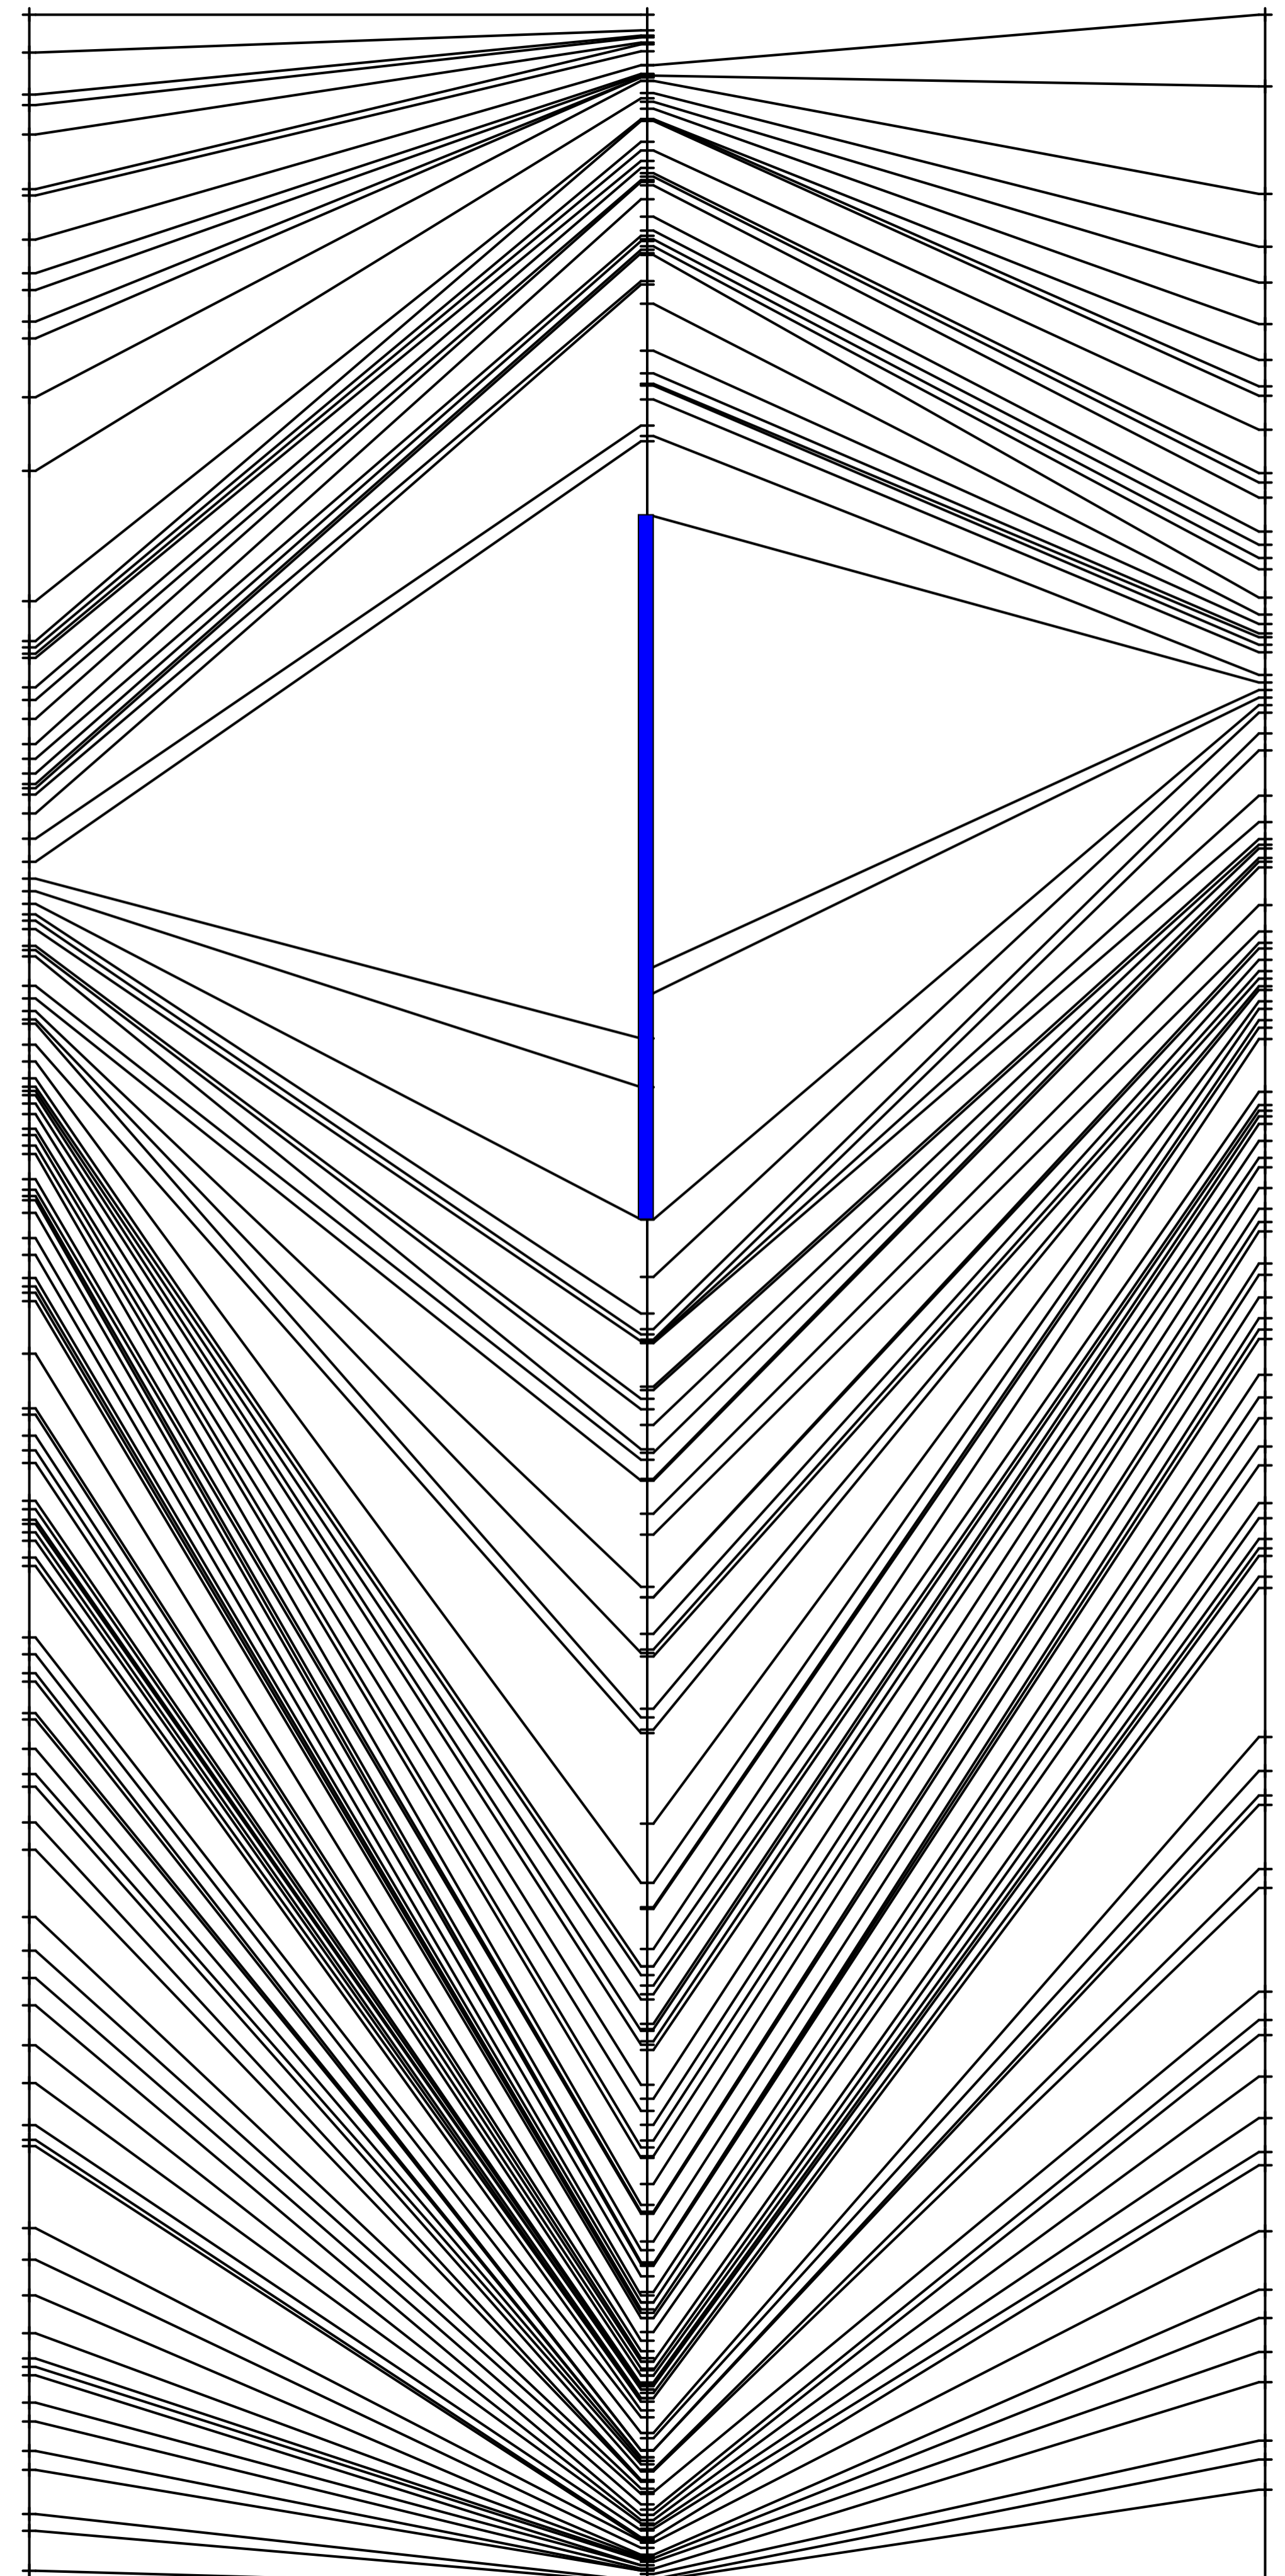

Supplement: pone.0028334.s004.pdf [file pone.0028334.s004.pdf]
