# Supplementary material for: A Large Maize (Zea mays L.) SNP Genotyping Array: Development and Germplasm Genotyping, and Genetic Mapping to Compare with the B73 Reference Genome
Source: PubMed Central journal article supplement (PMC3234264; doi:10.1371/journal.pone.0028334), 2011-12-08

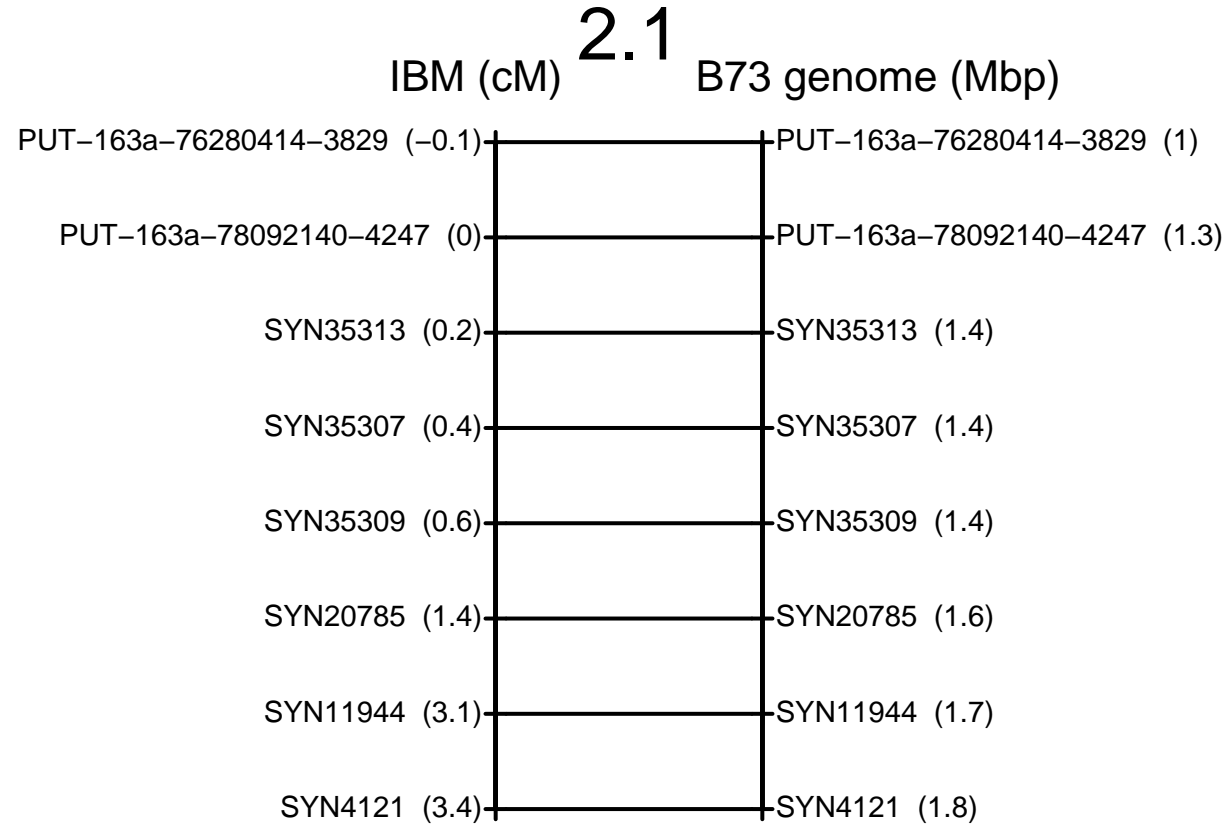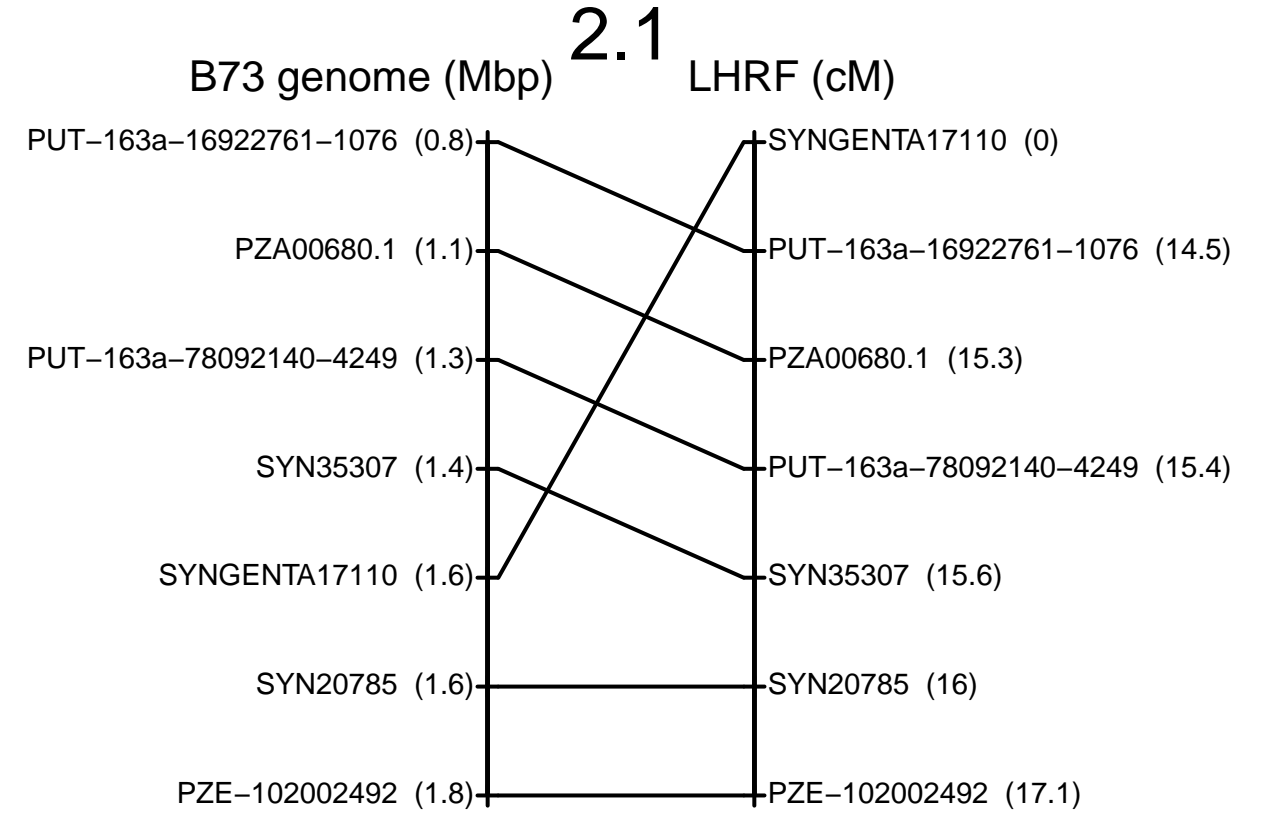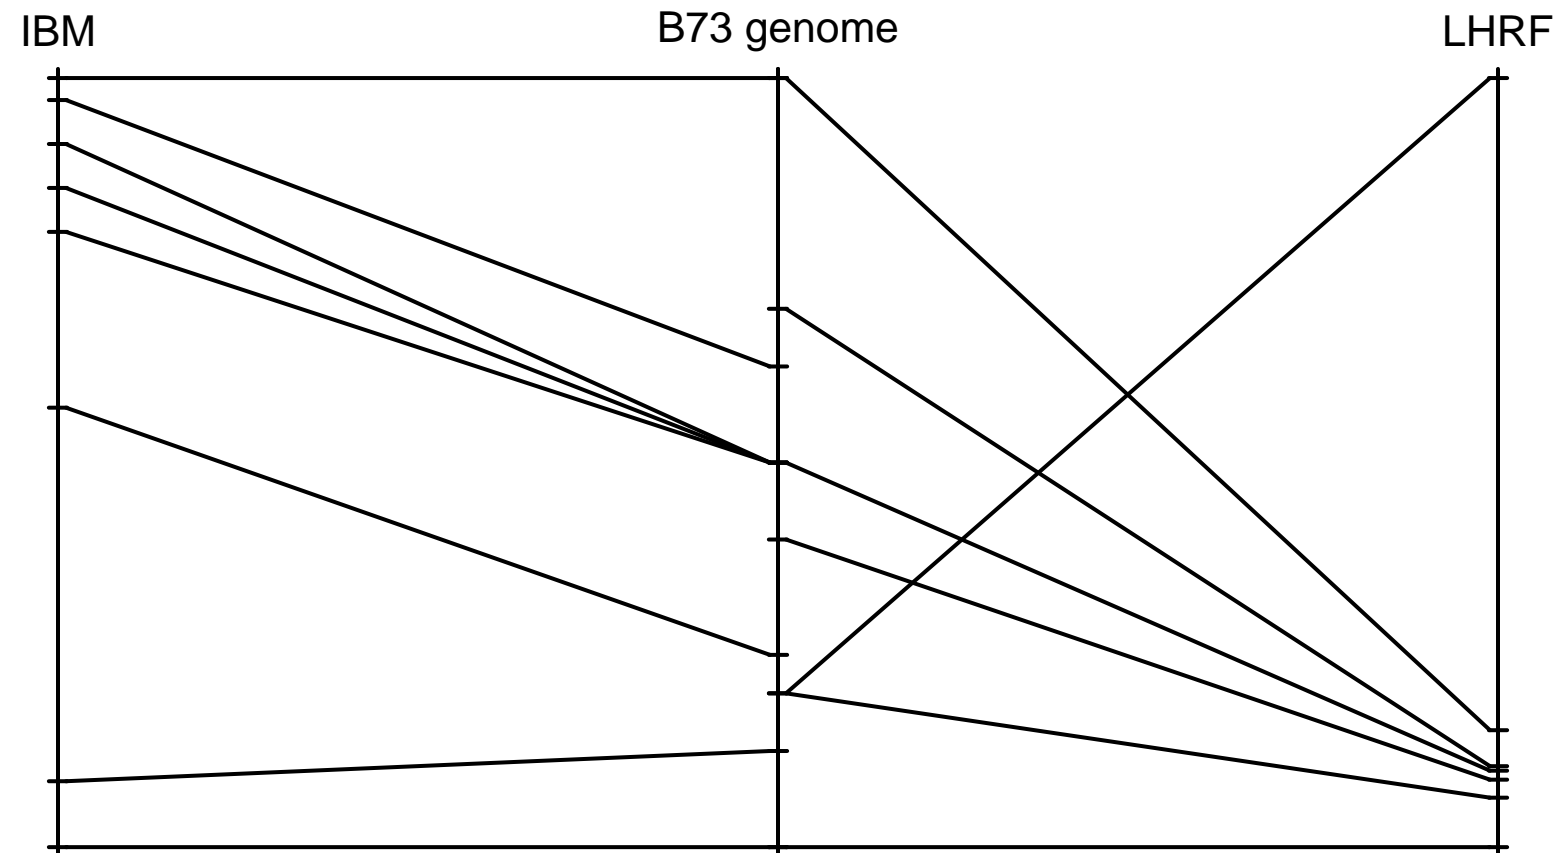

2.2  
IBM (cM) B73 genome (Mbp)

2.2  
B73 genome (Mbp) LHRF (cM)

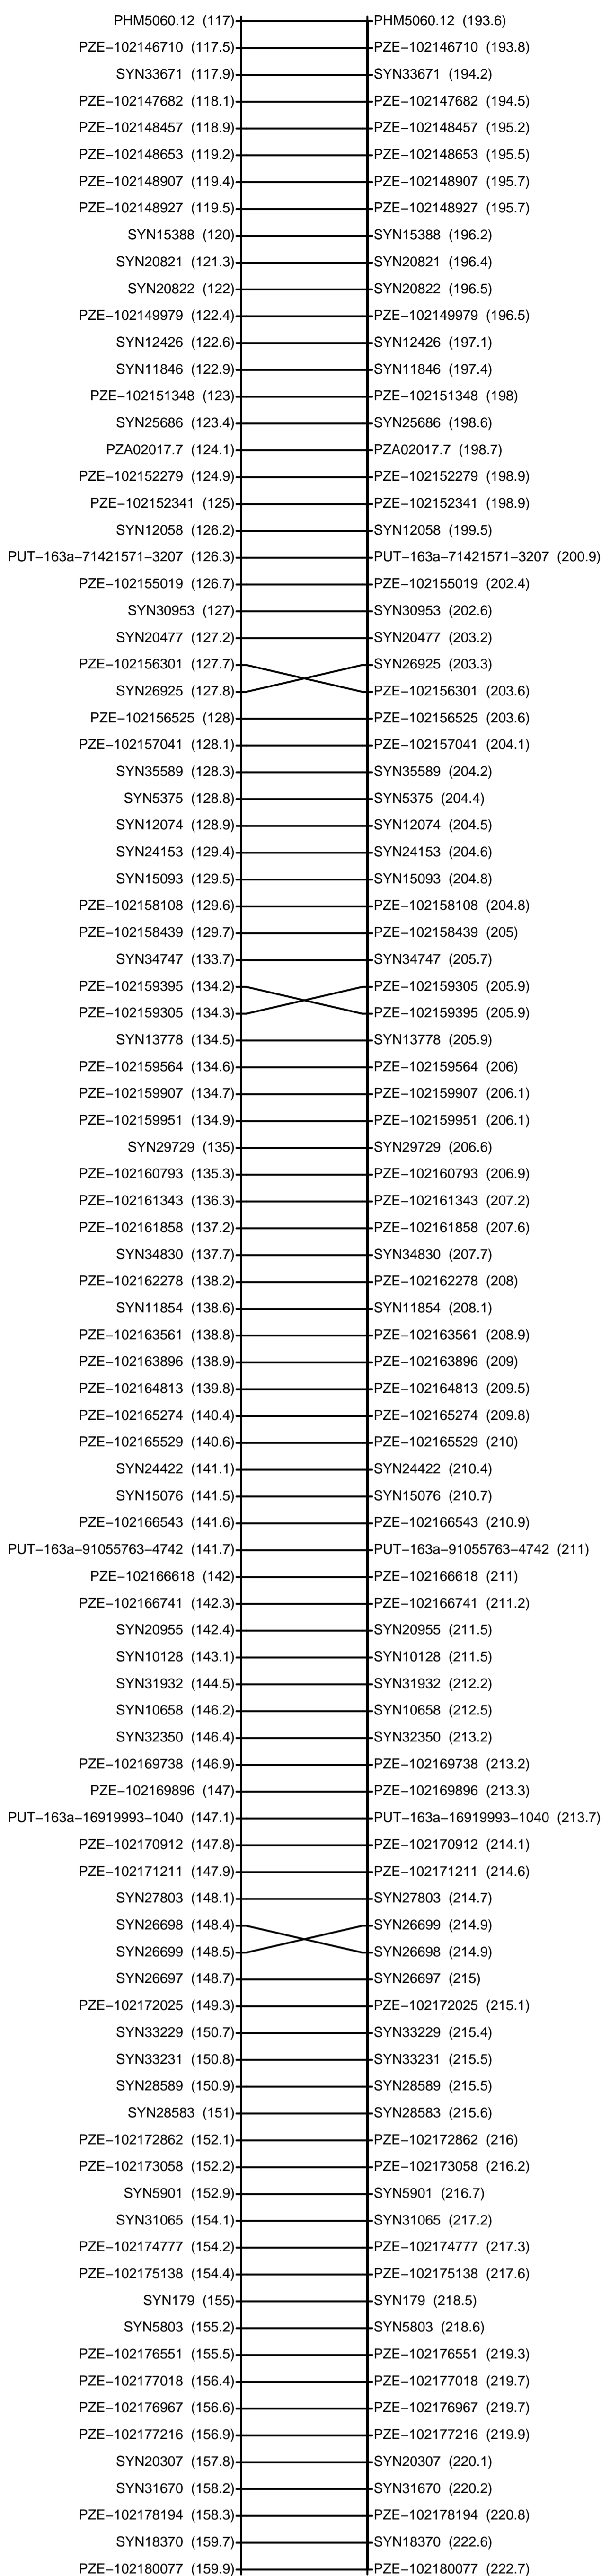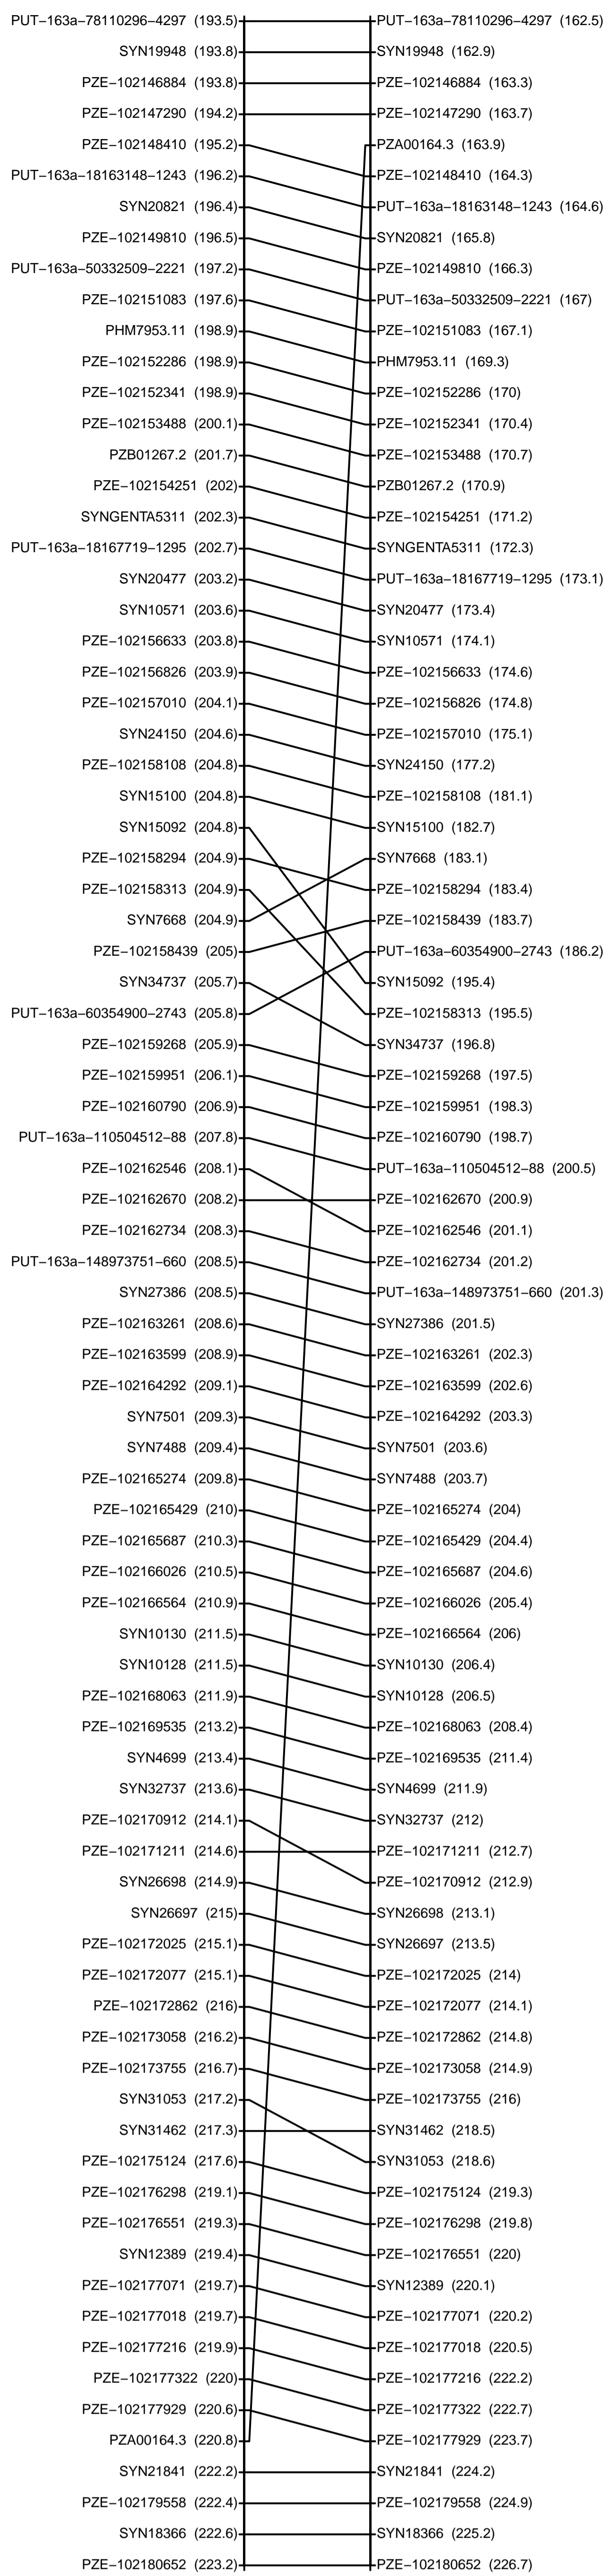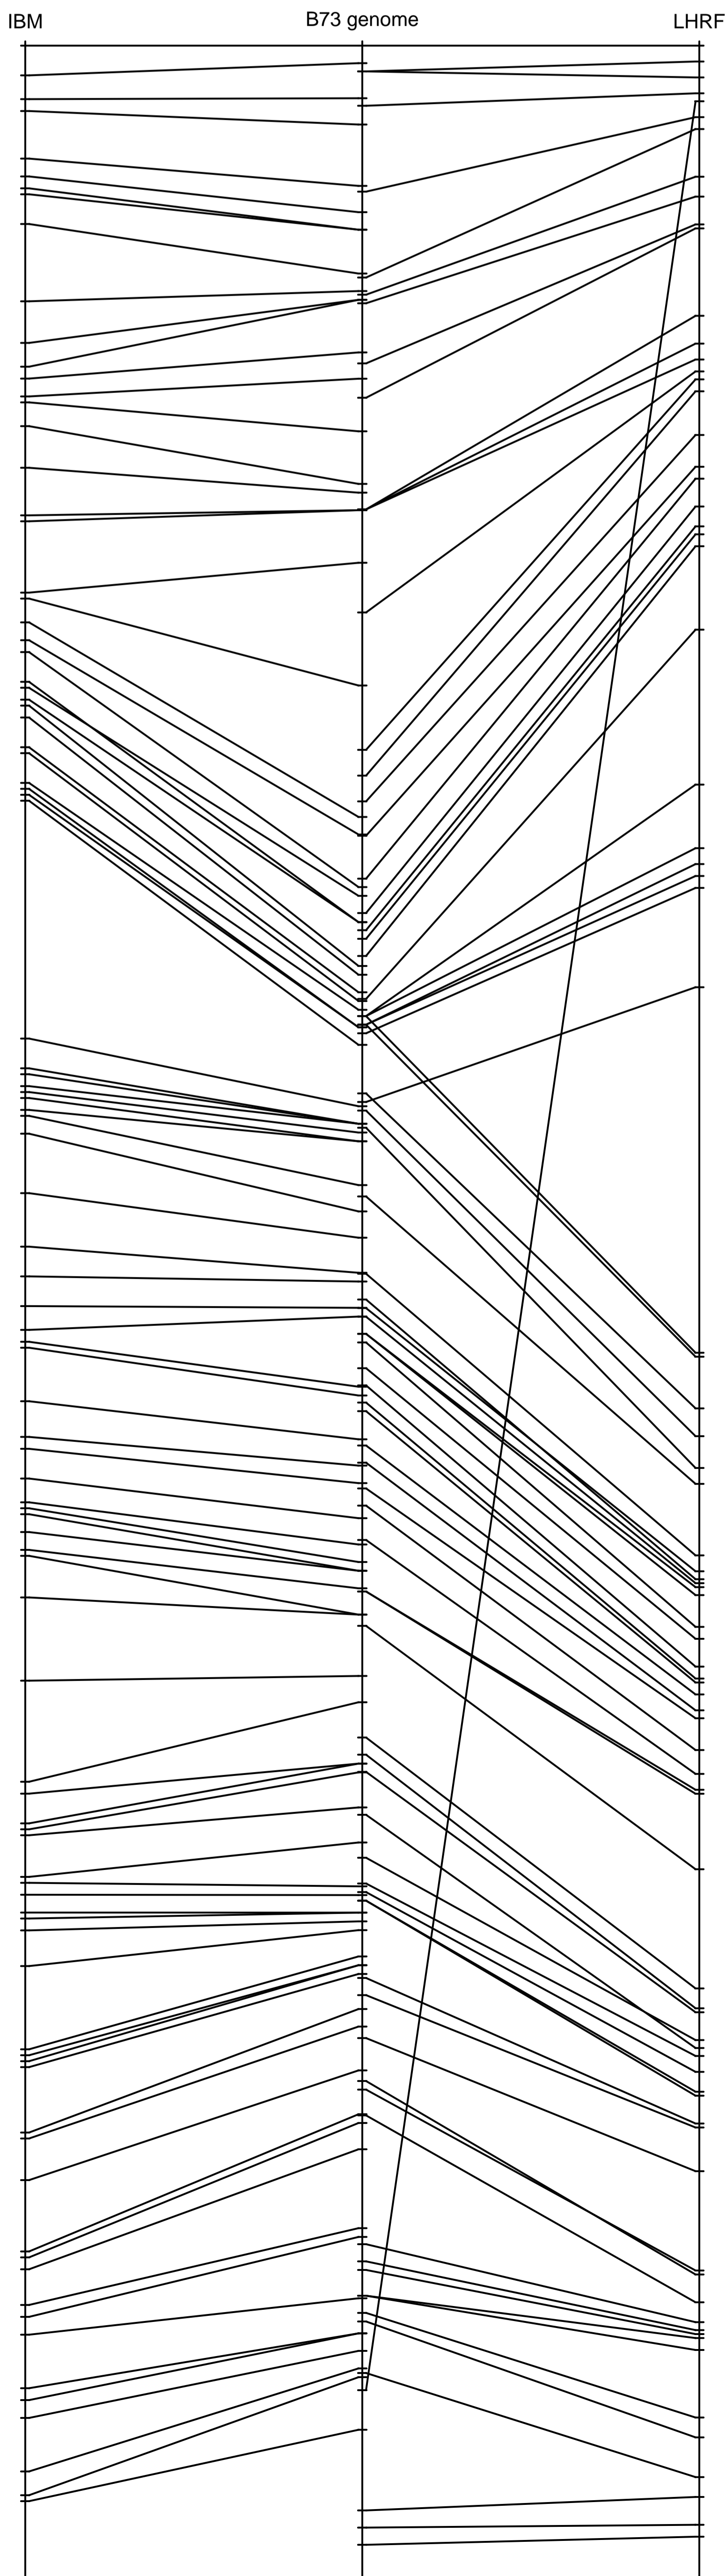

2.3

IBM (cM) B73 genome (Mbp)

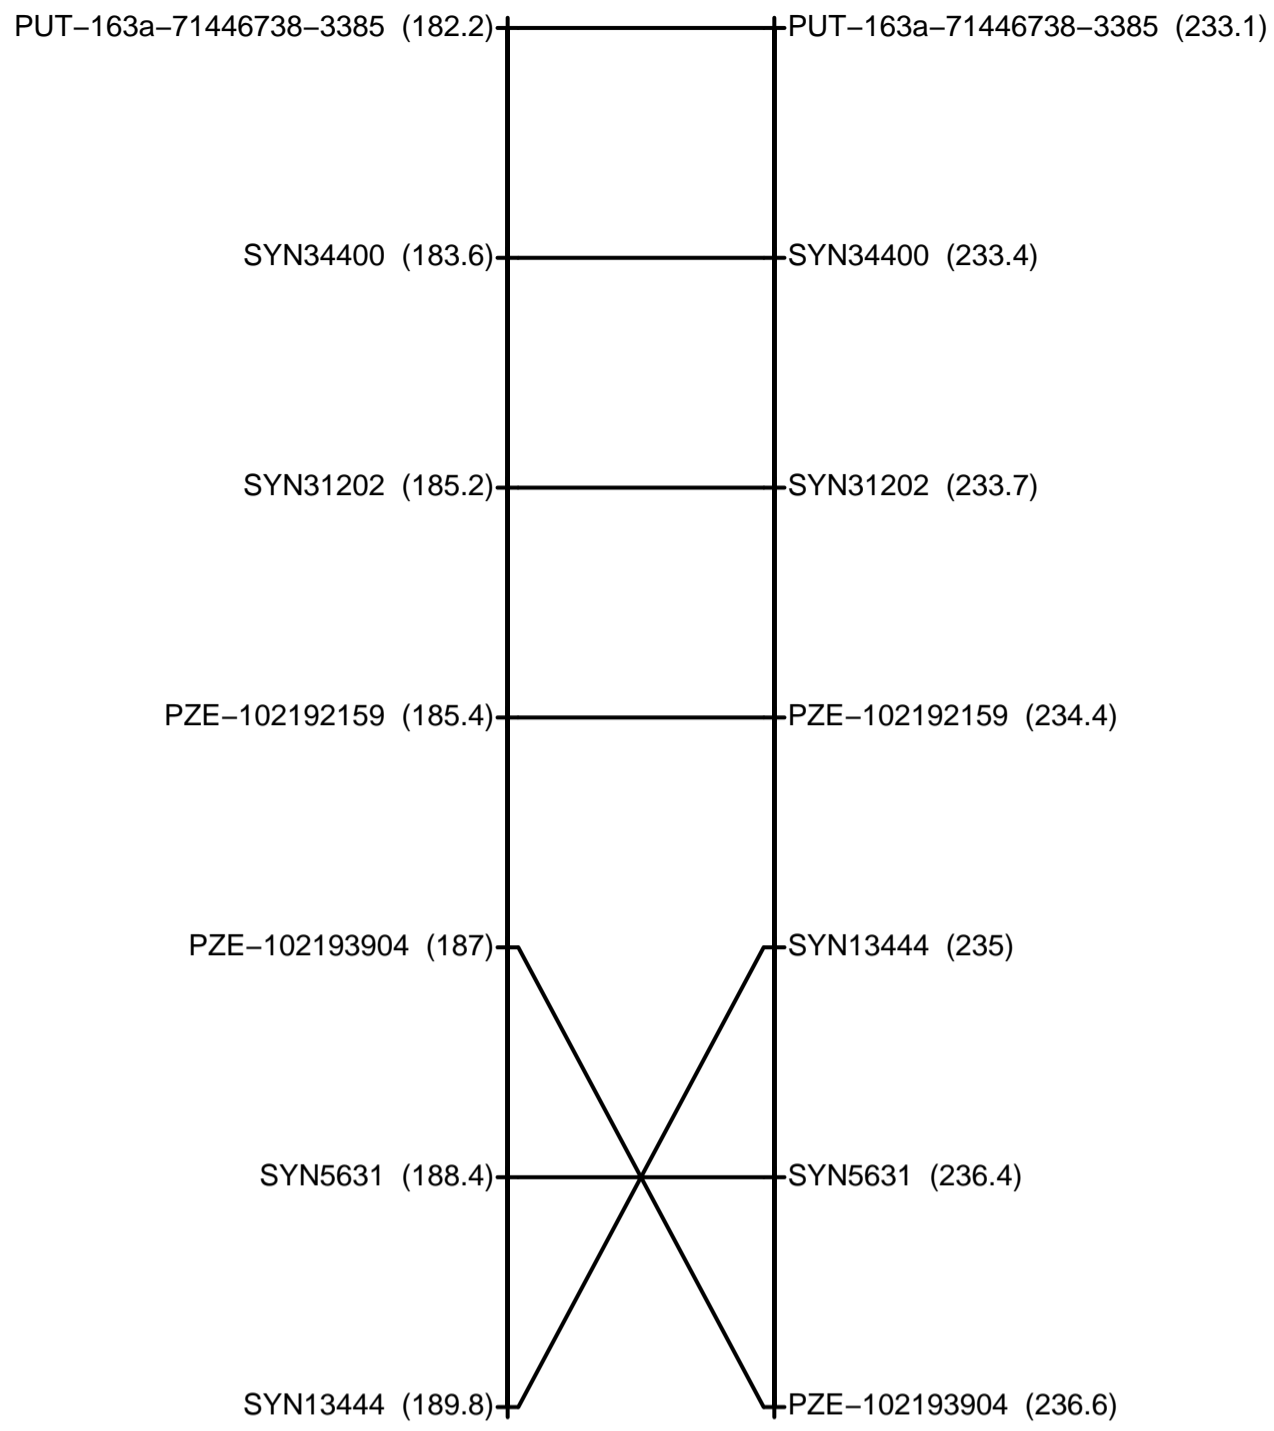

2.3

B73 genome (Mbp) LHRF (cM)

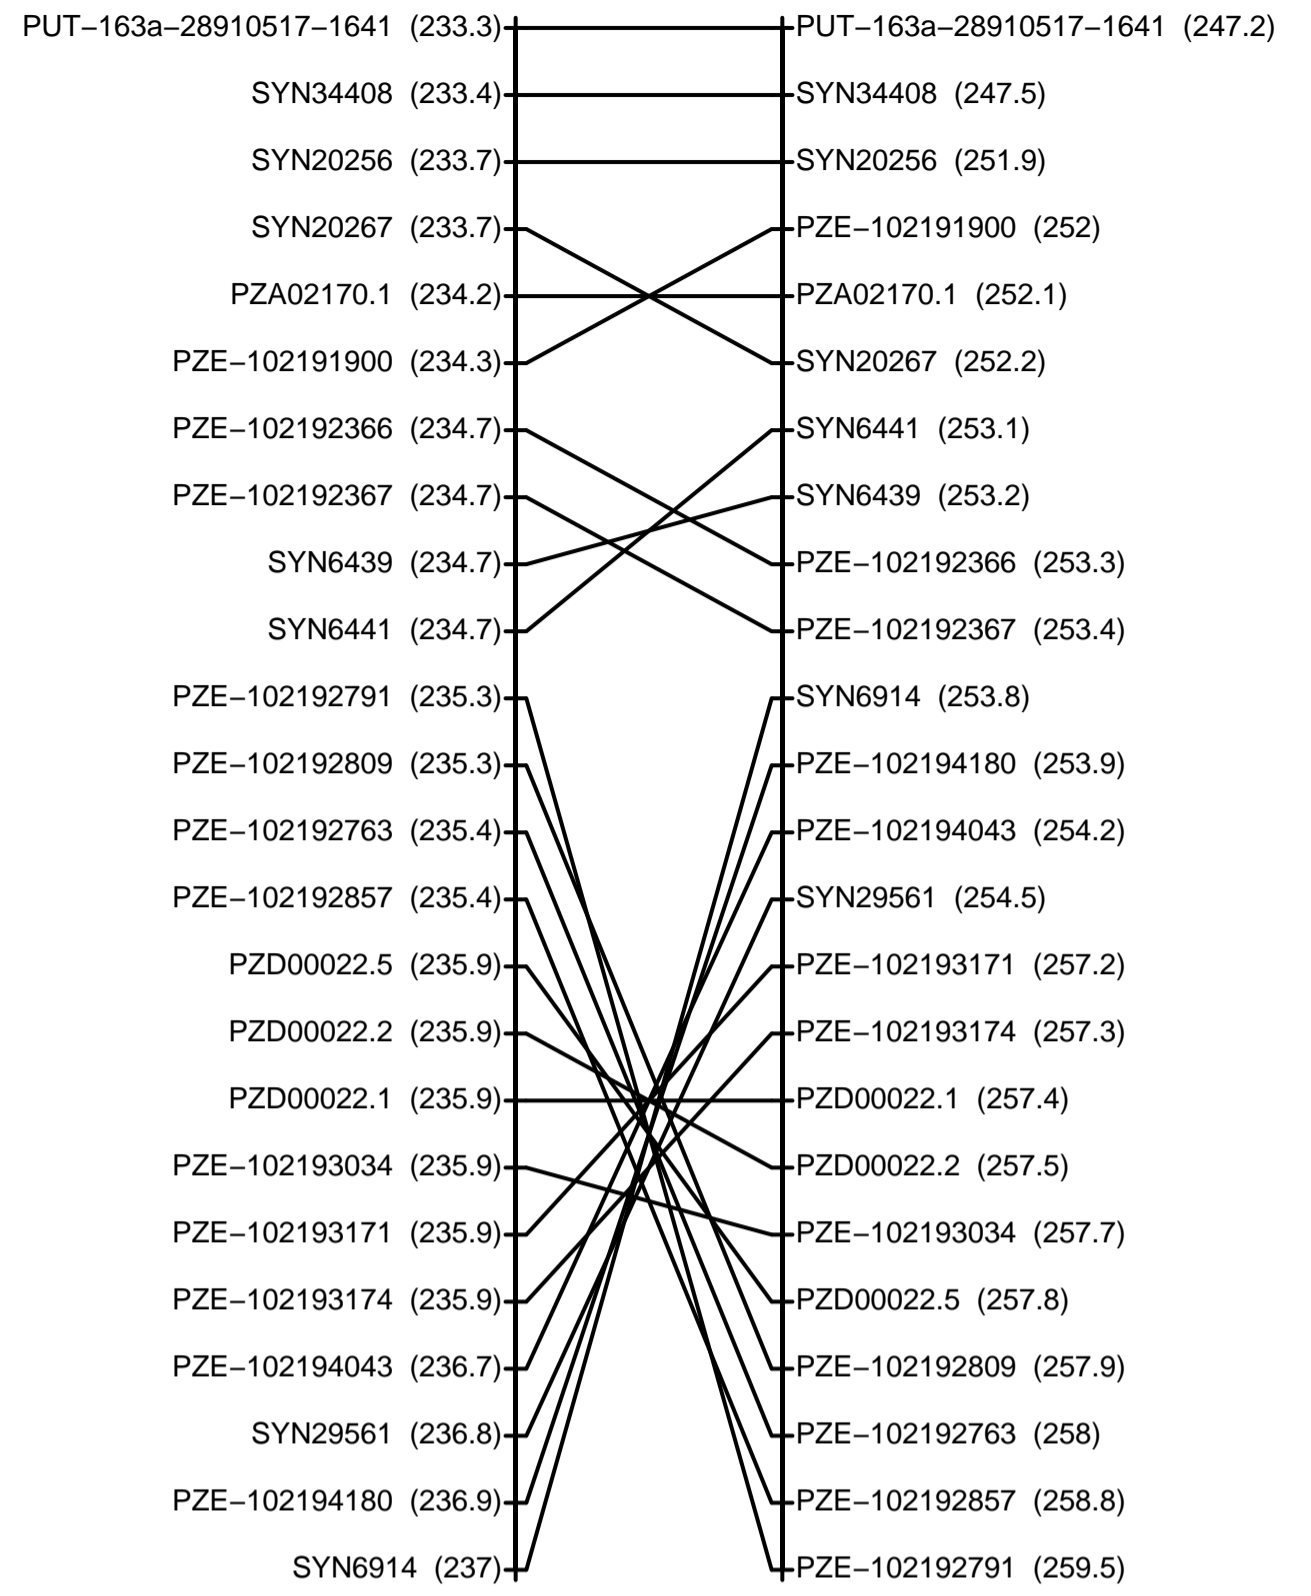

IBM

B73 genome

LHRF

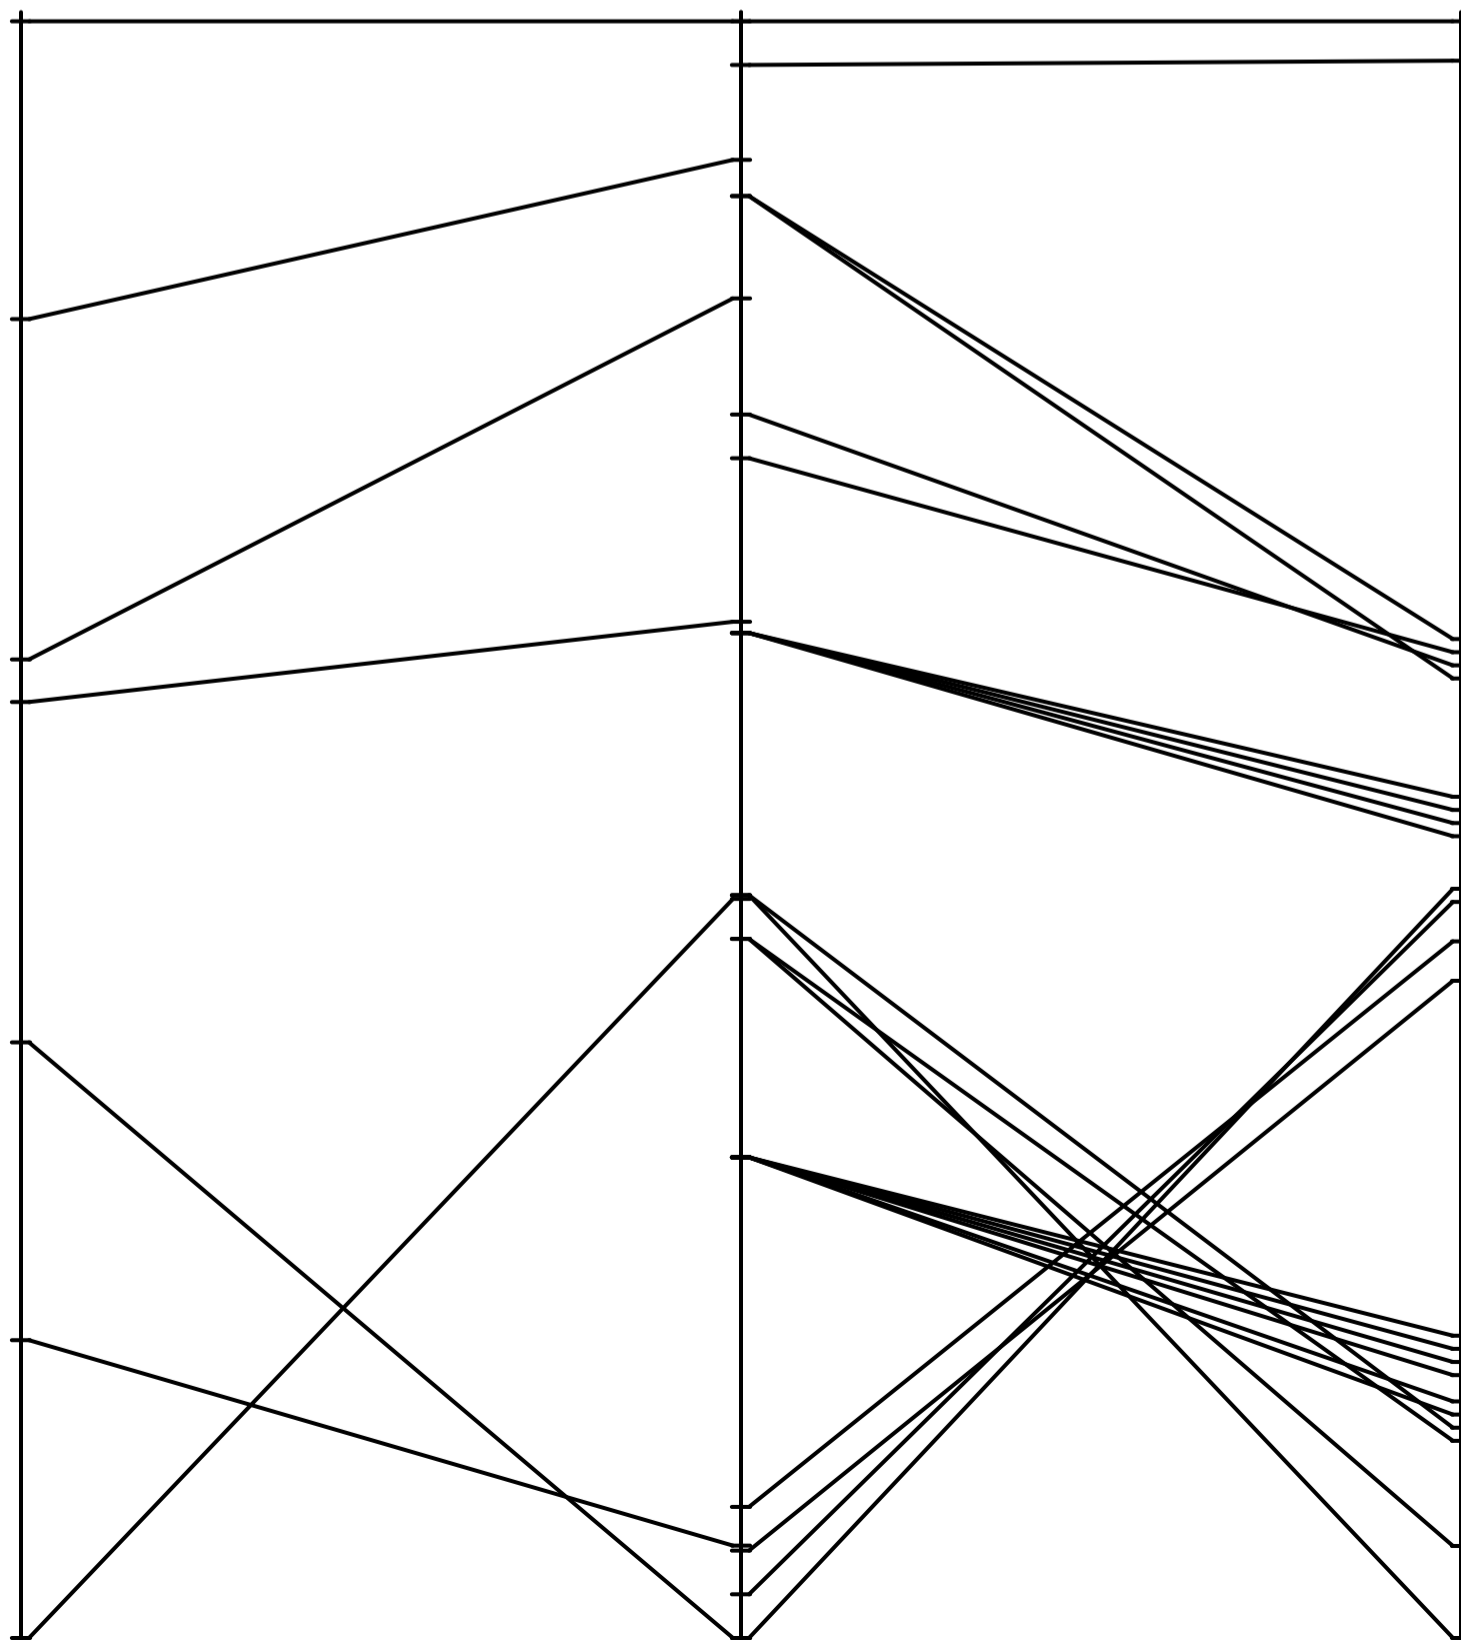

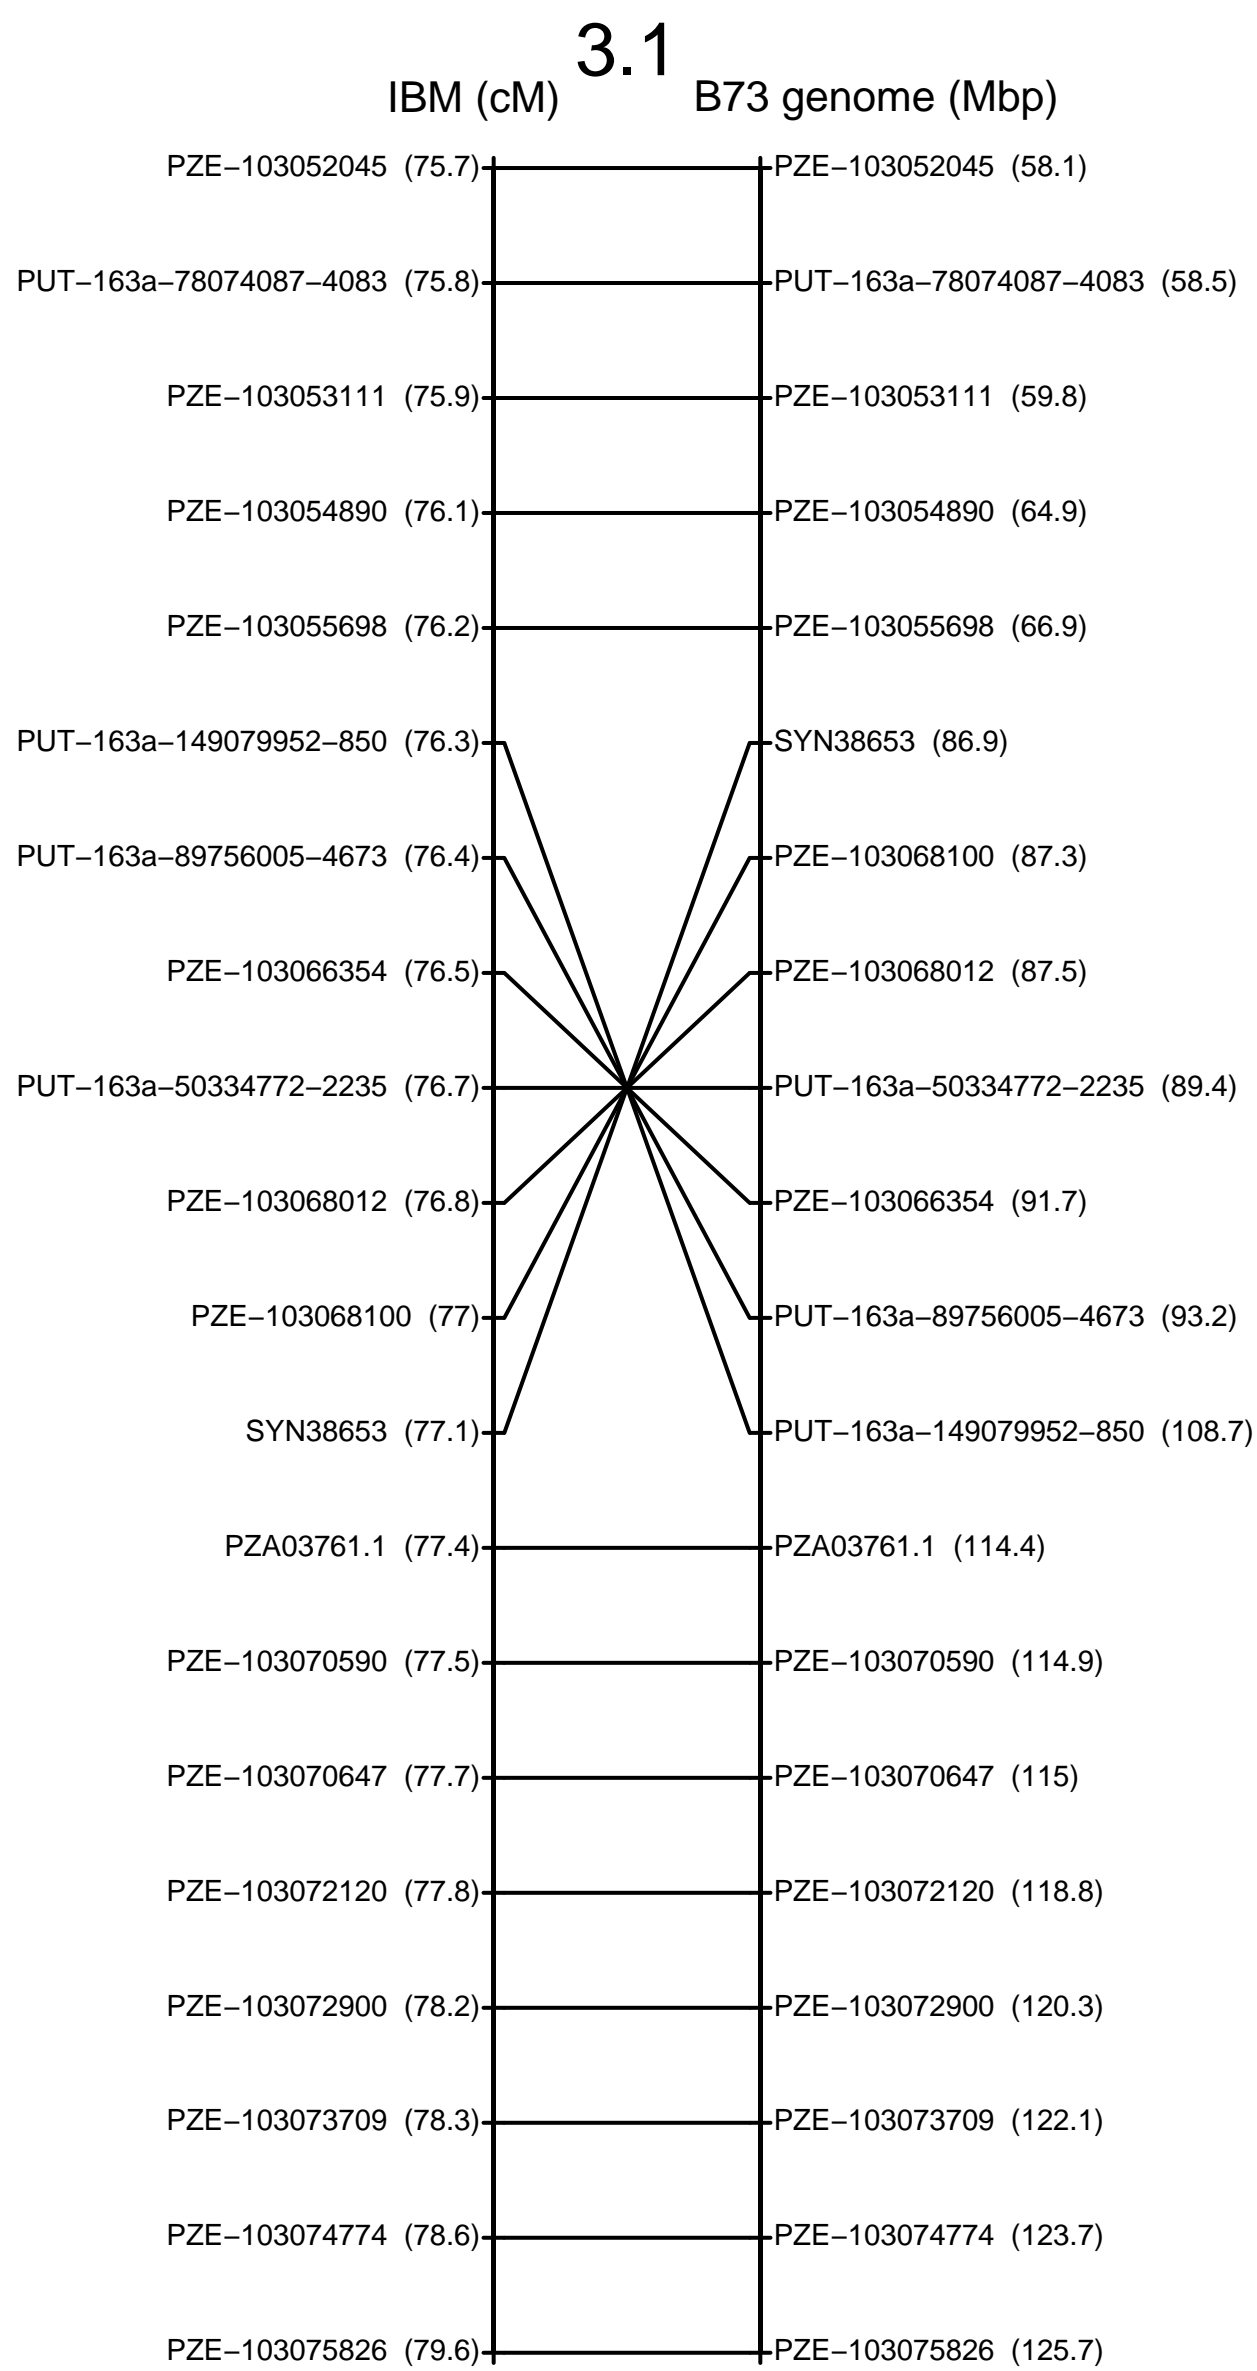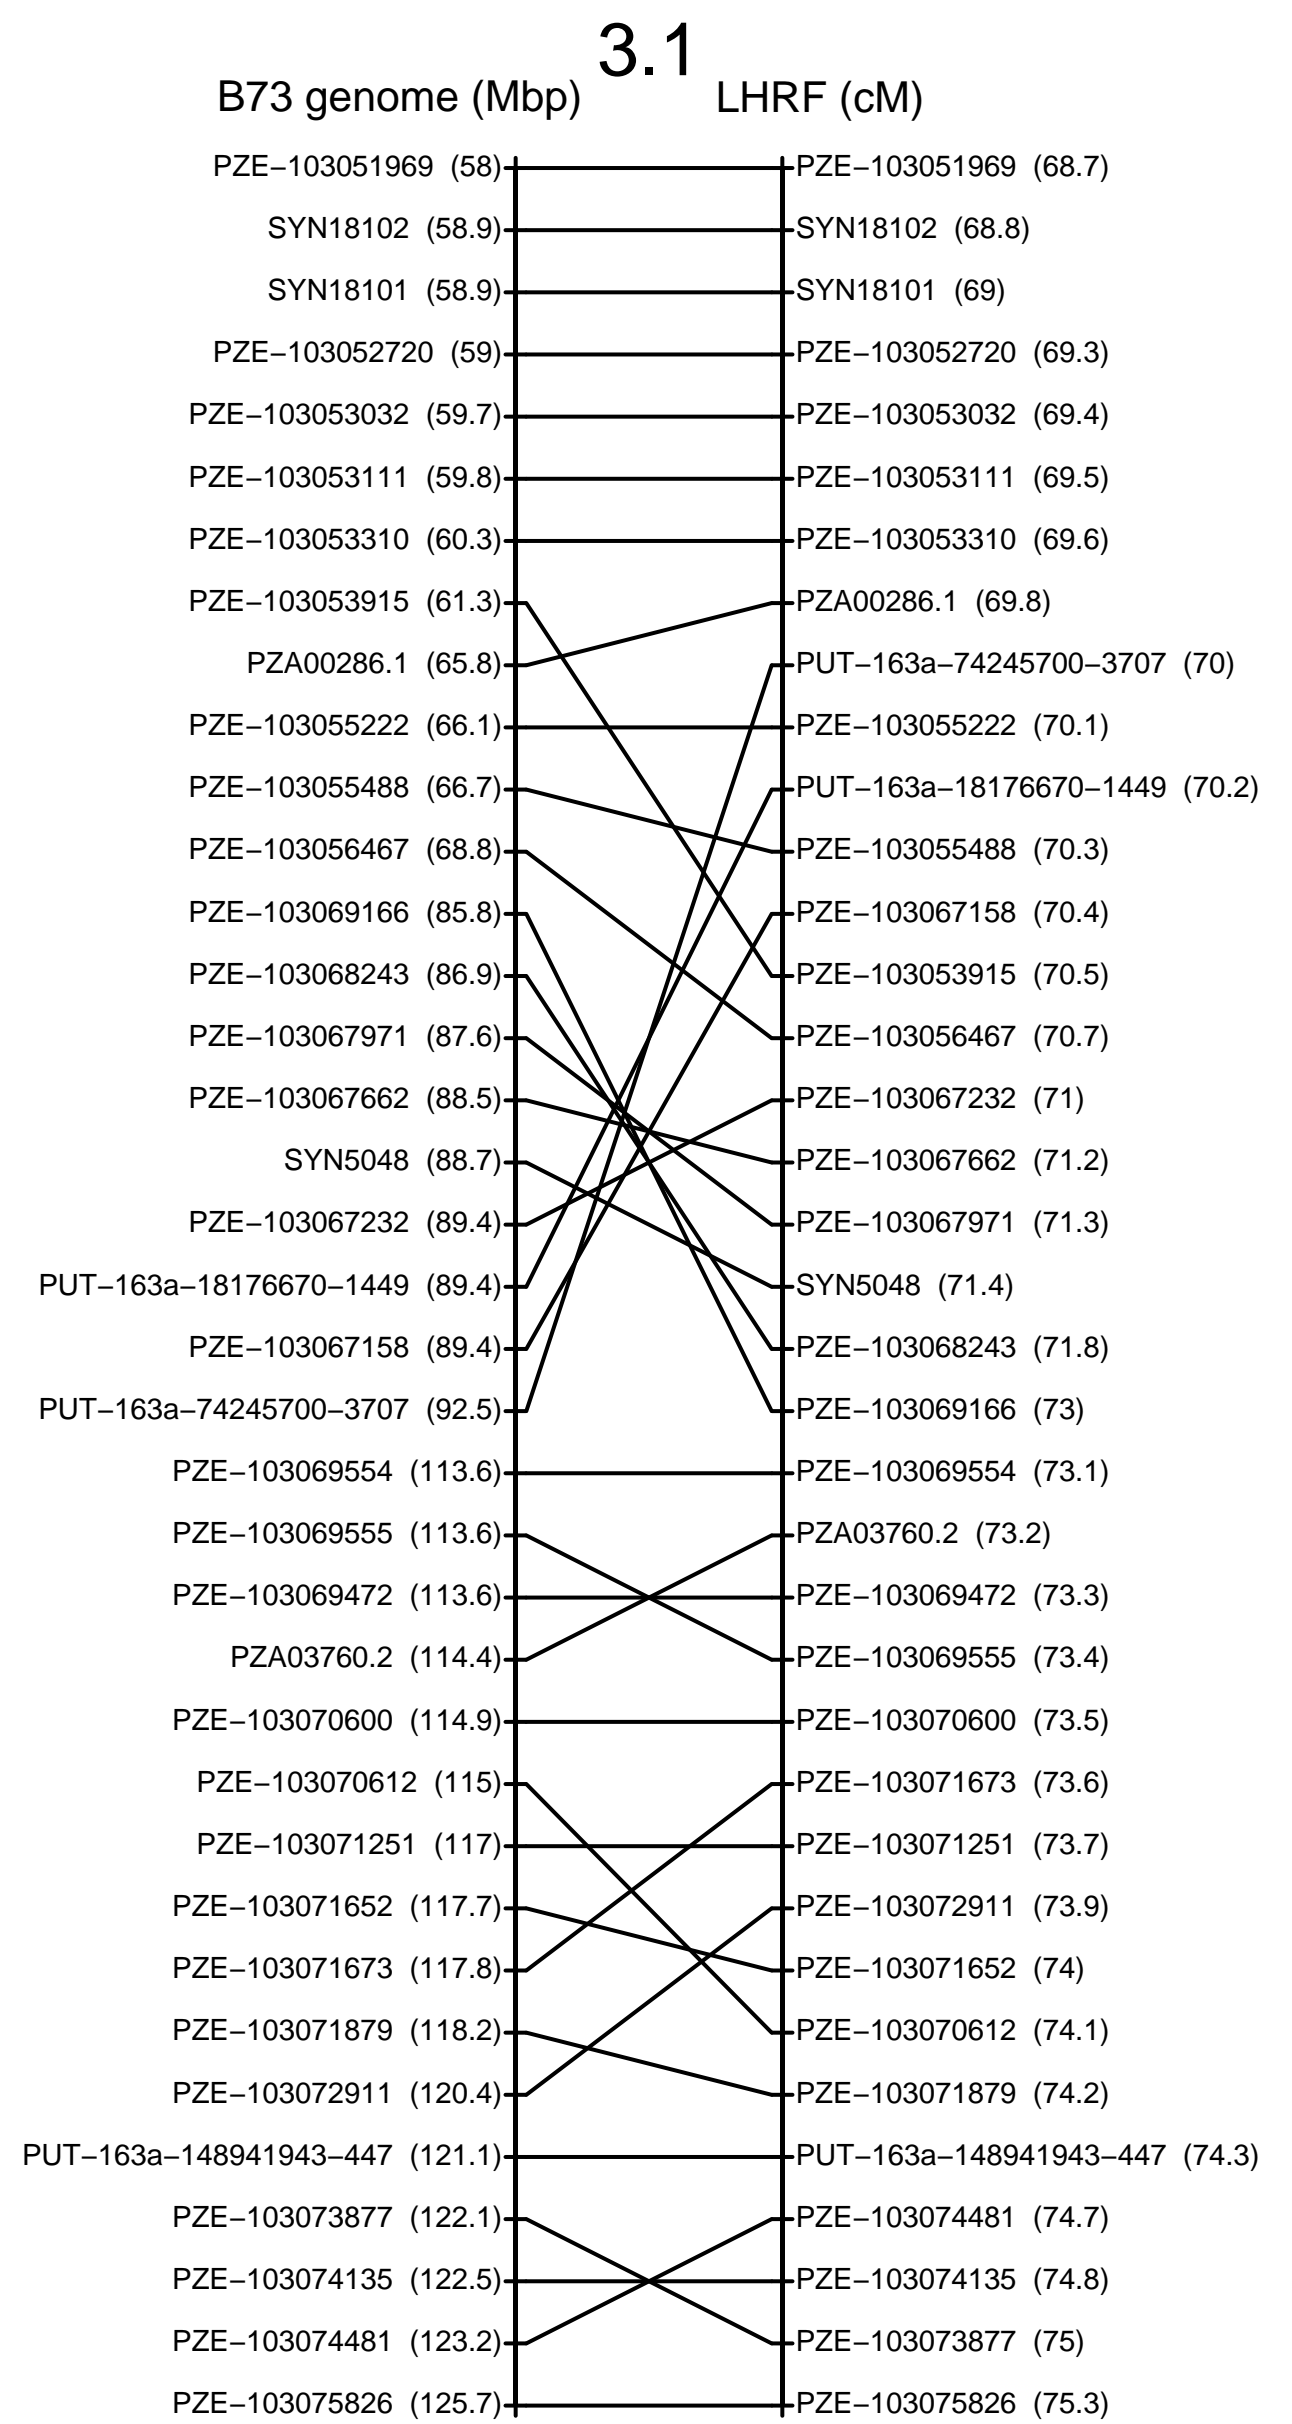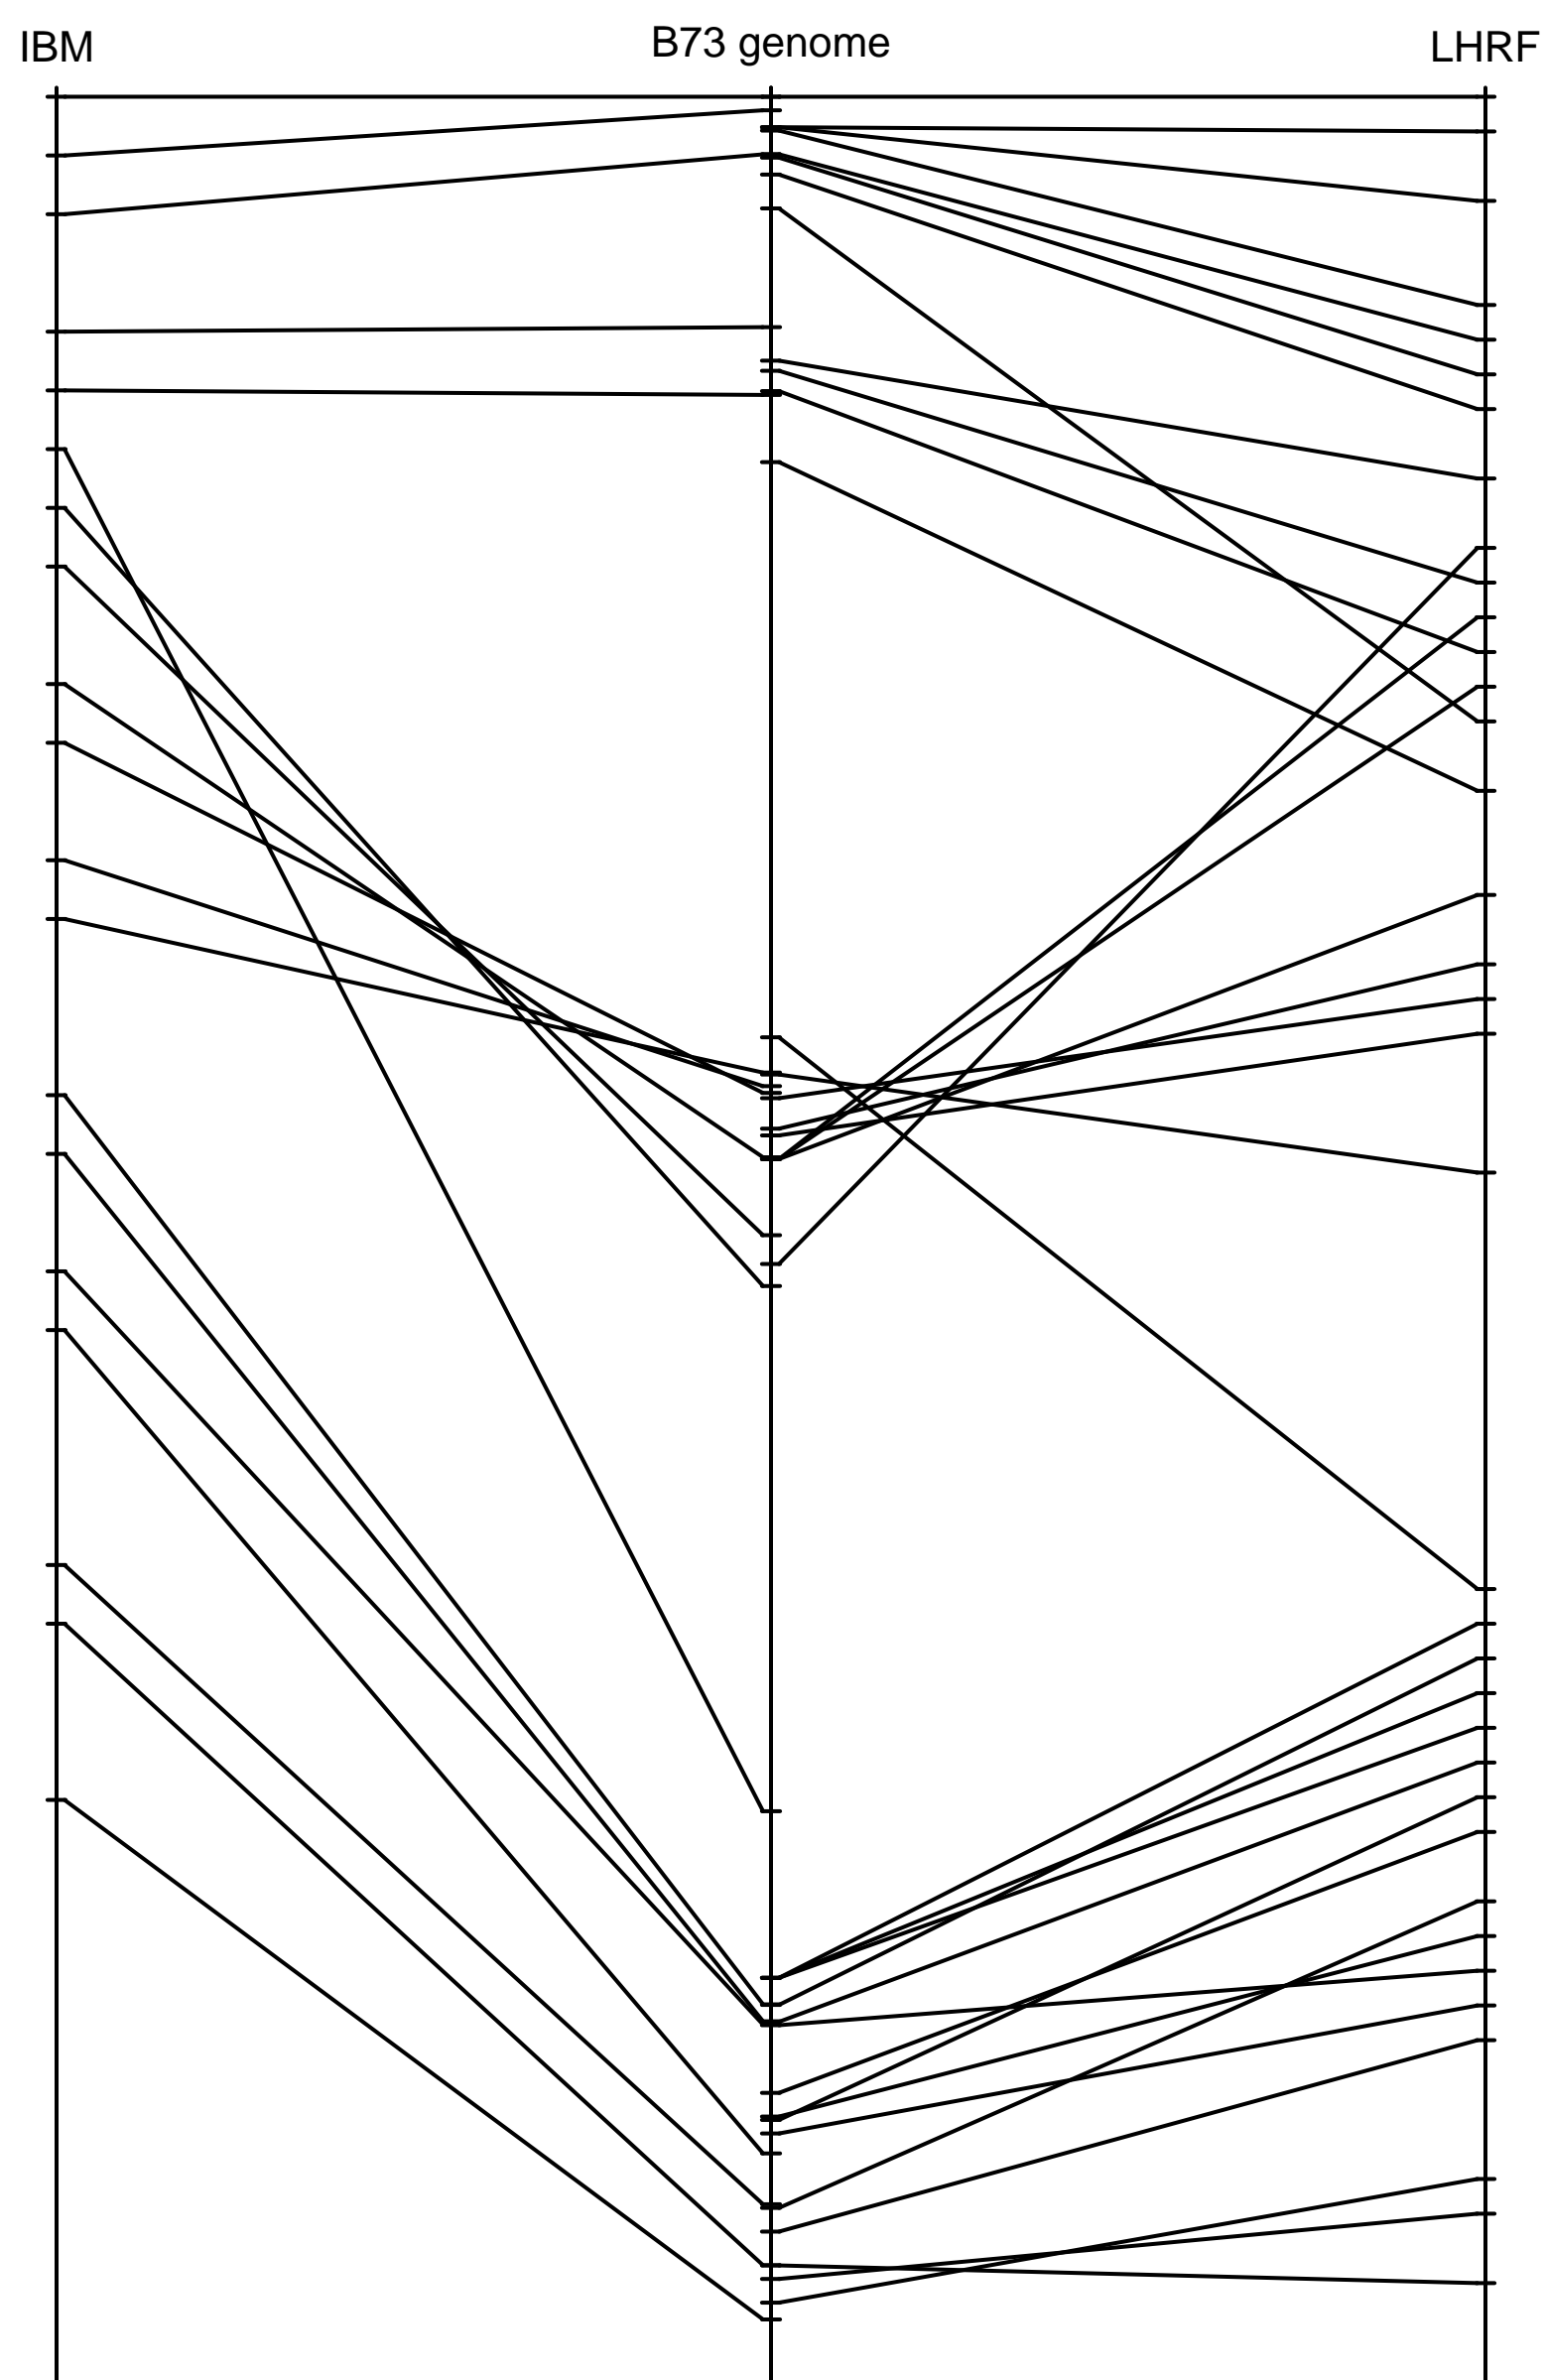

5.1

IBM (cM)

B73 genome (Mbp)

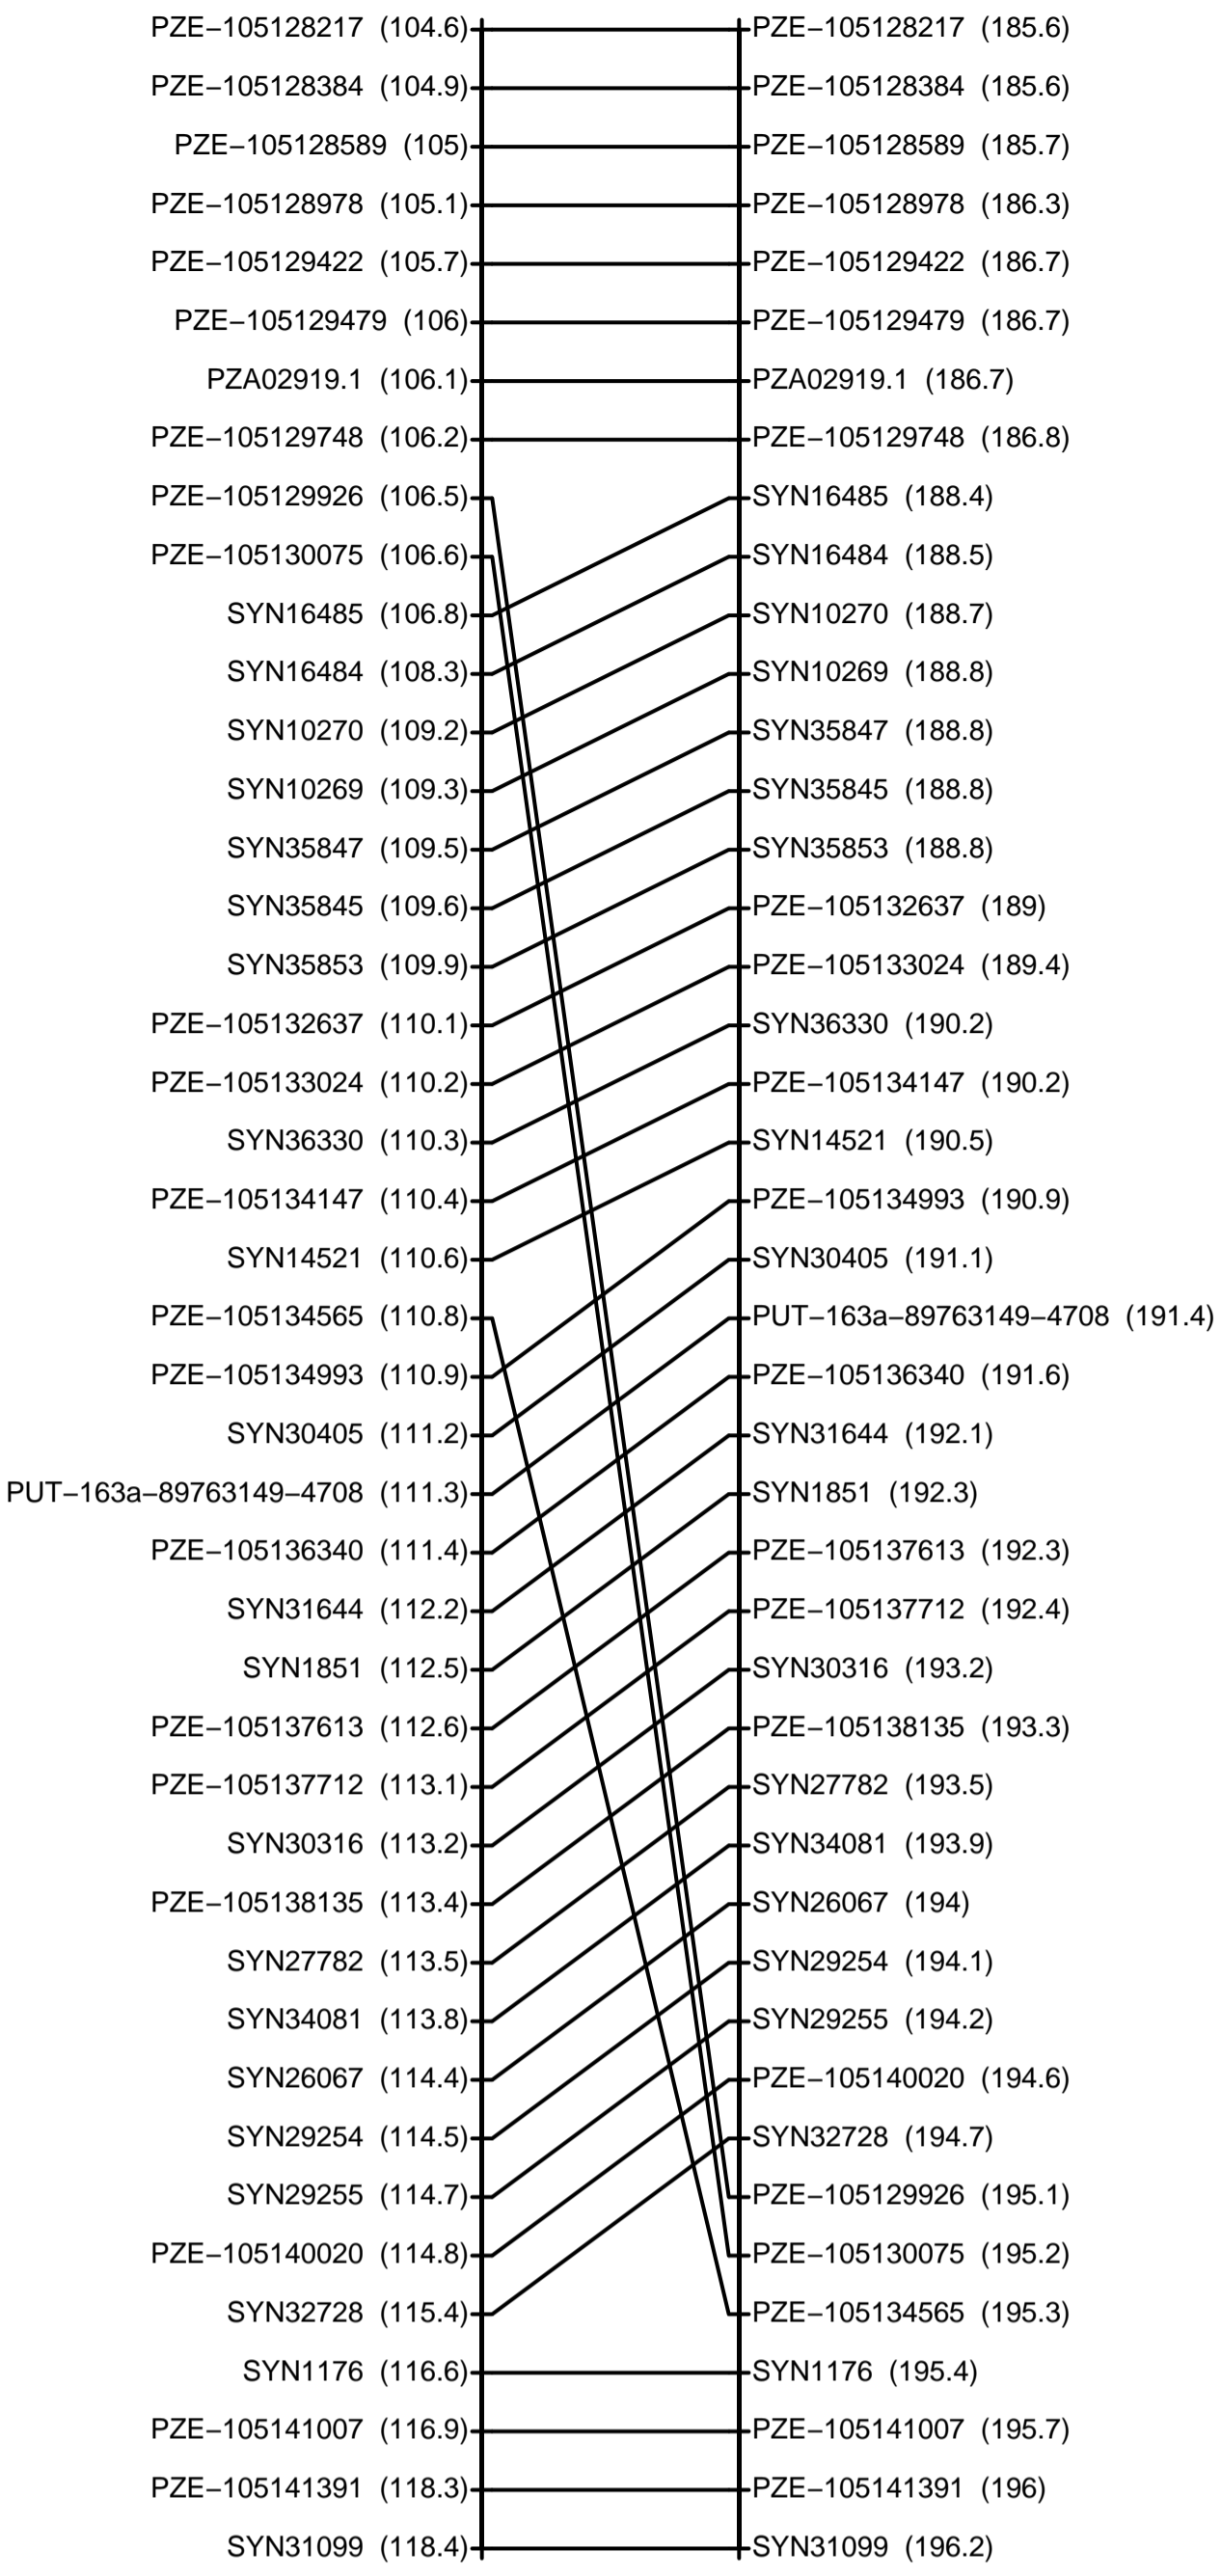

5.1

B73 genome (Mbp)

LHRF (cM)

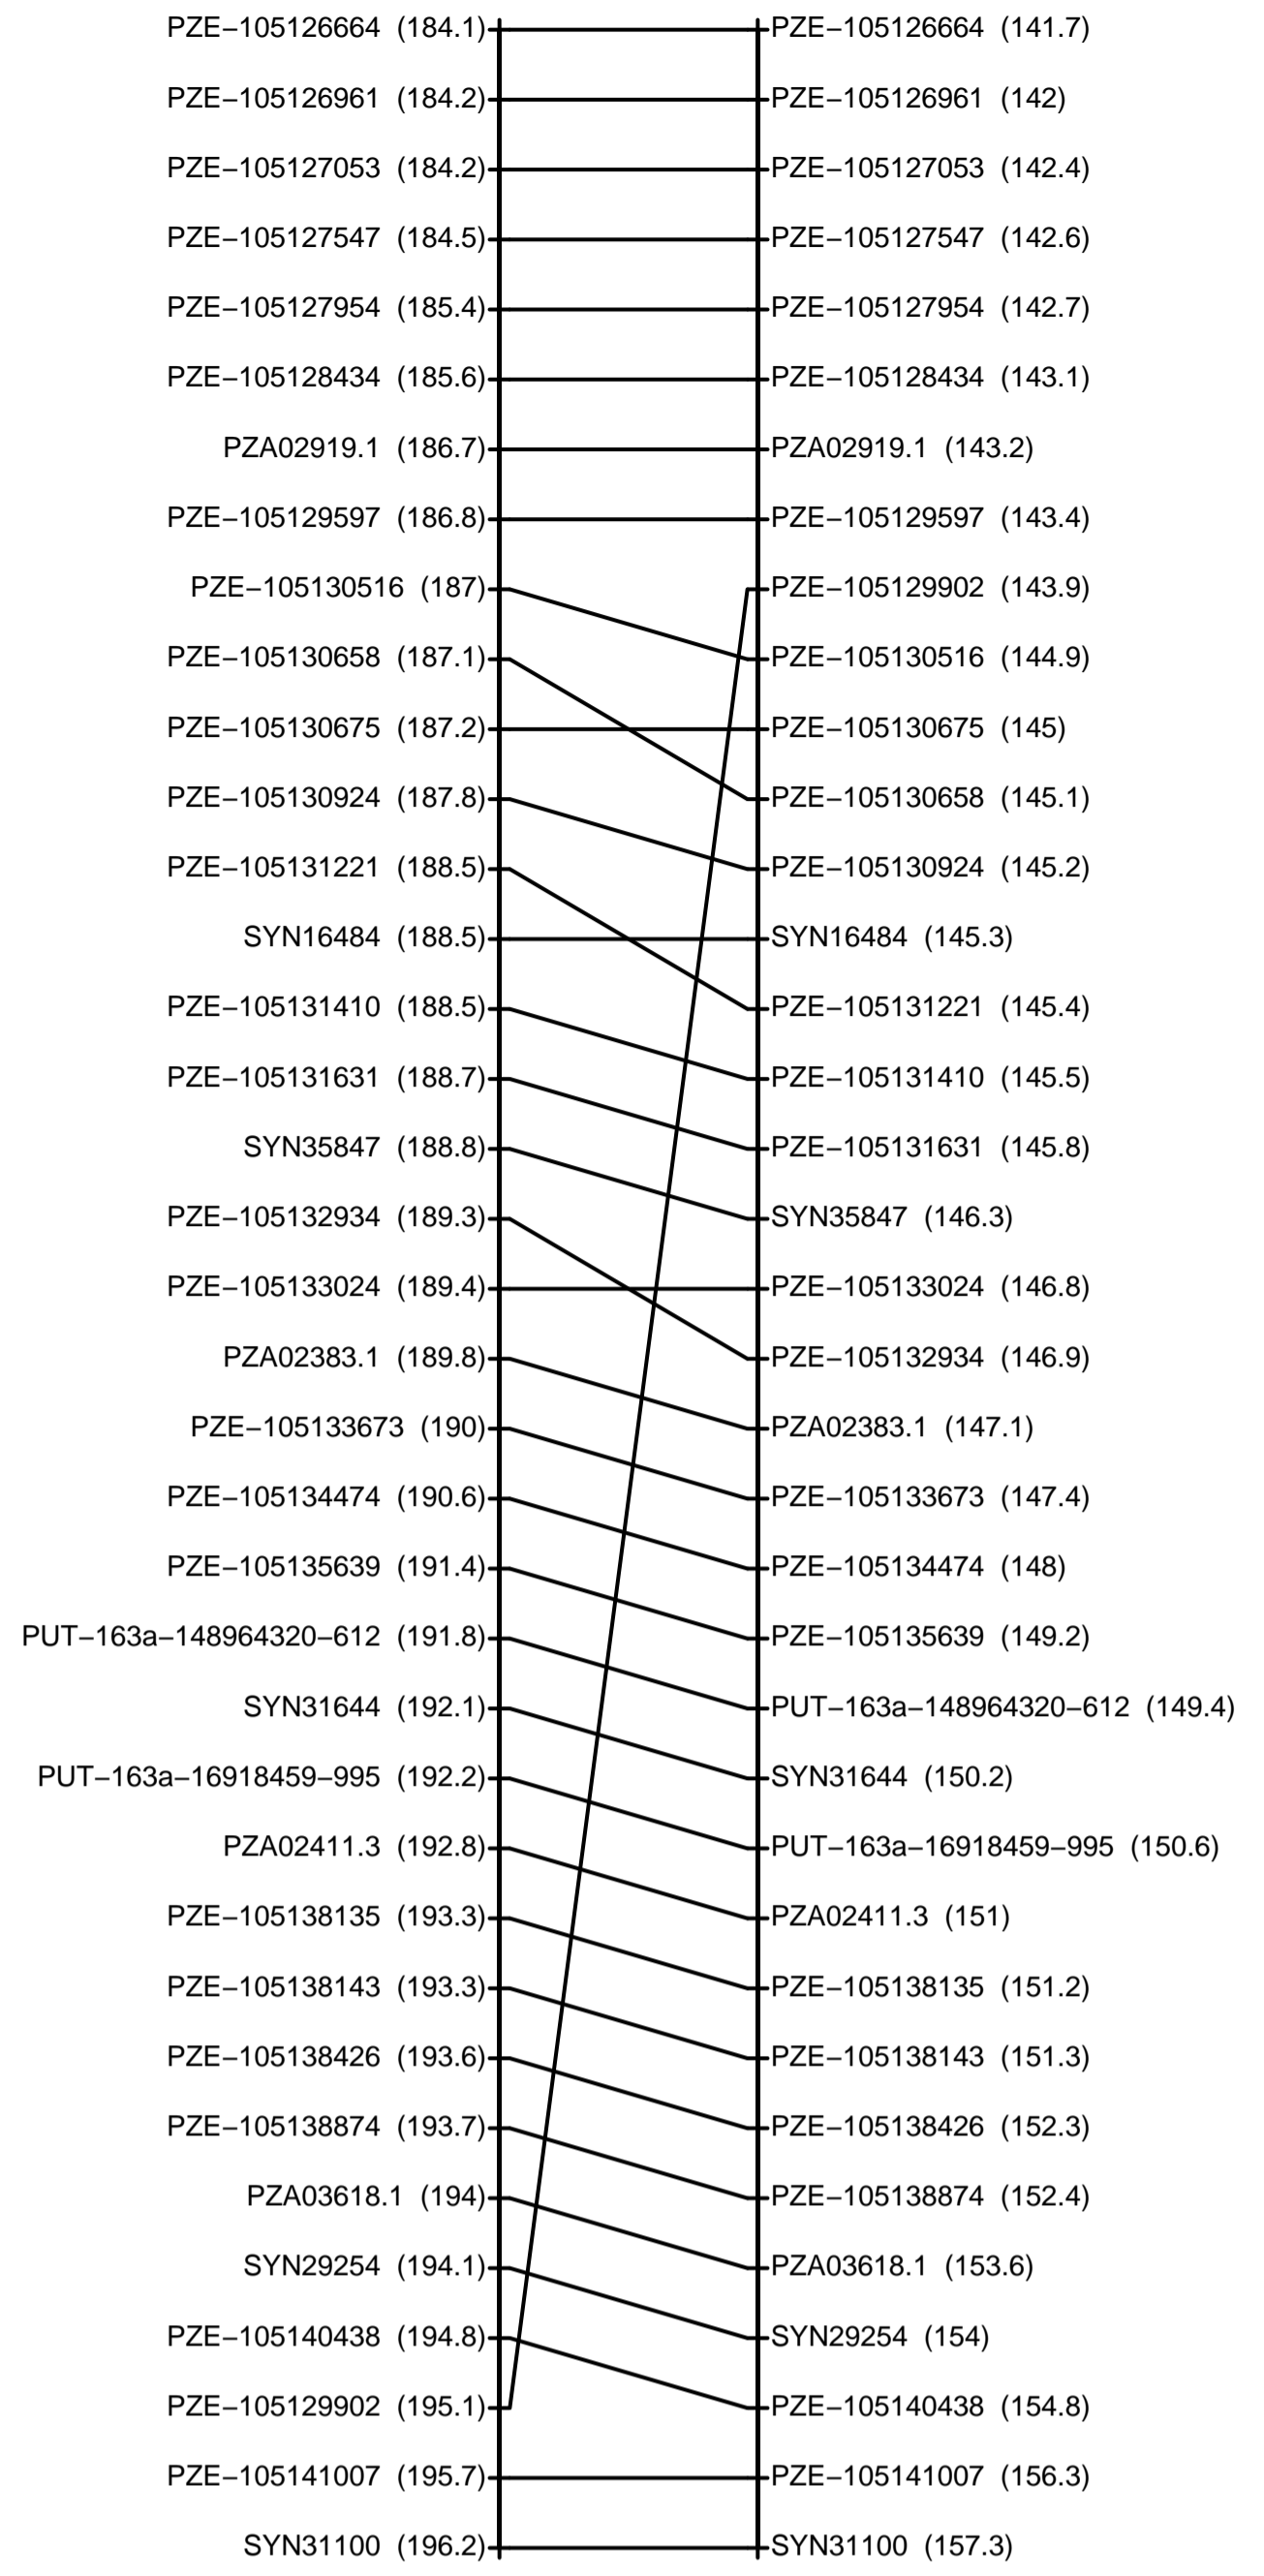

IBM

B73 genome

LHRF

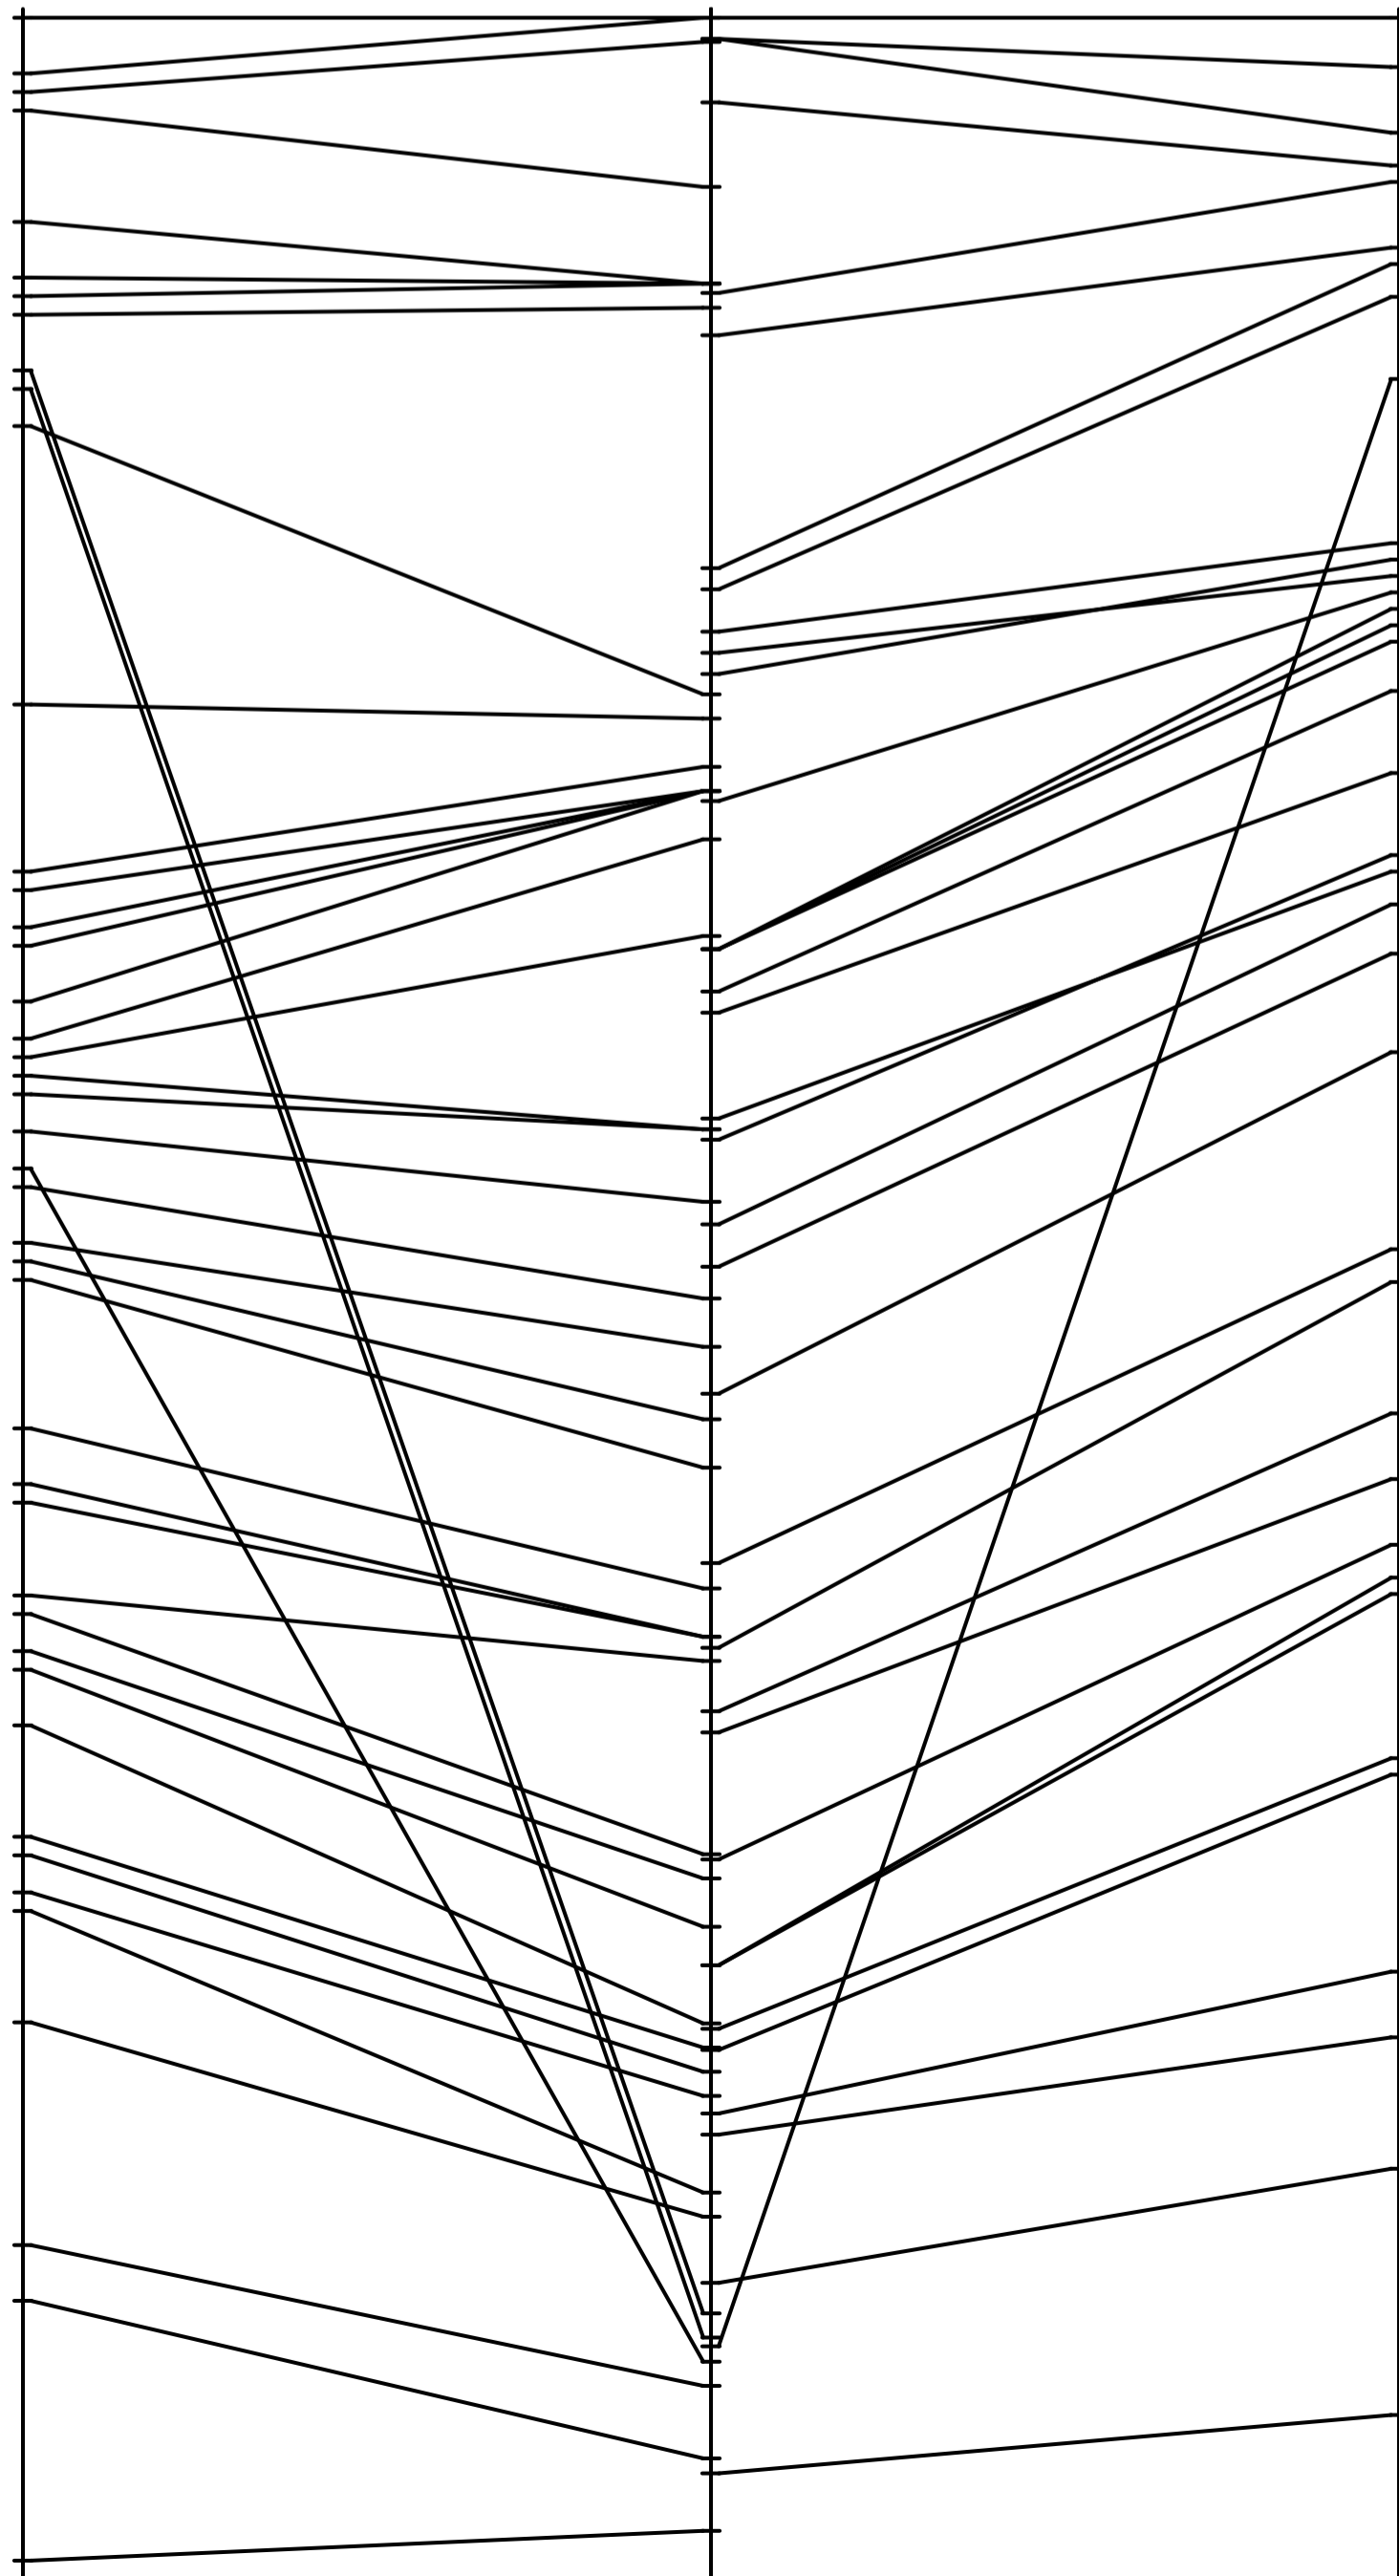

6.1

IBM (cM)

B73 genome (Mbp)

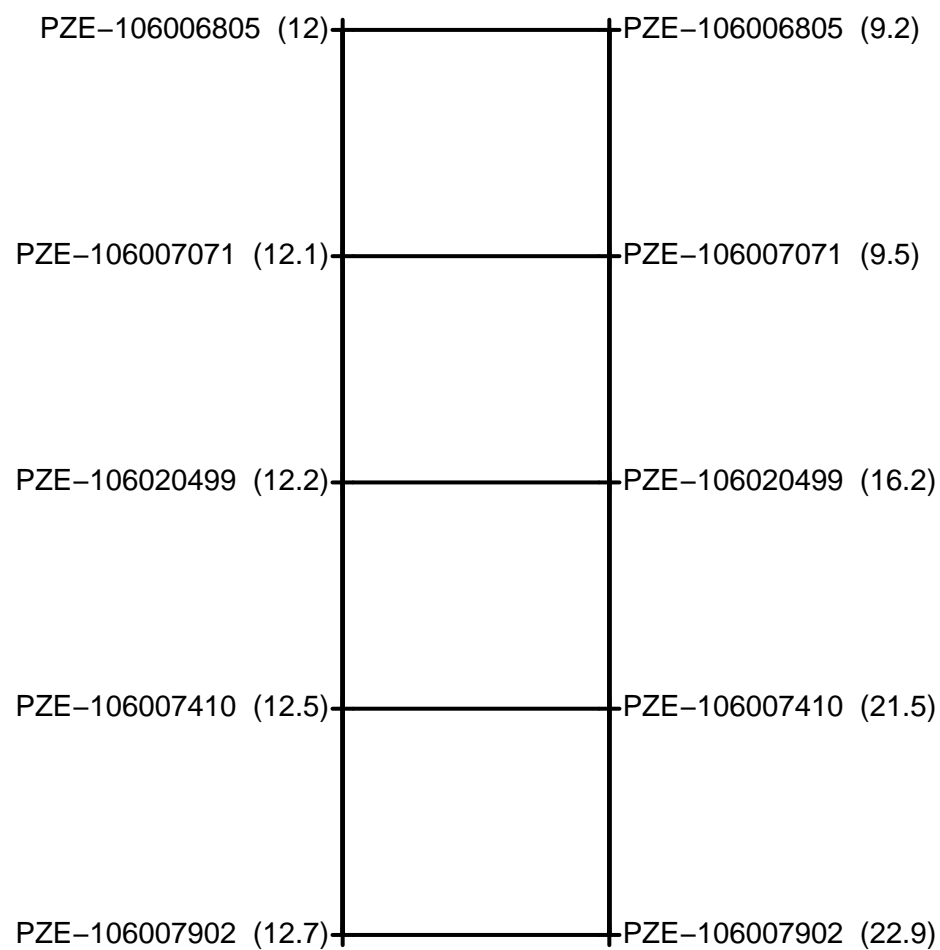

6.1

B73 genome (Mbp)

LHRF (cM)

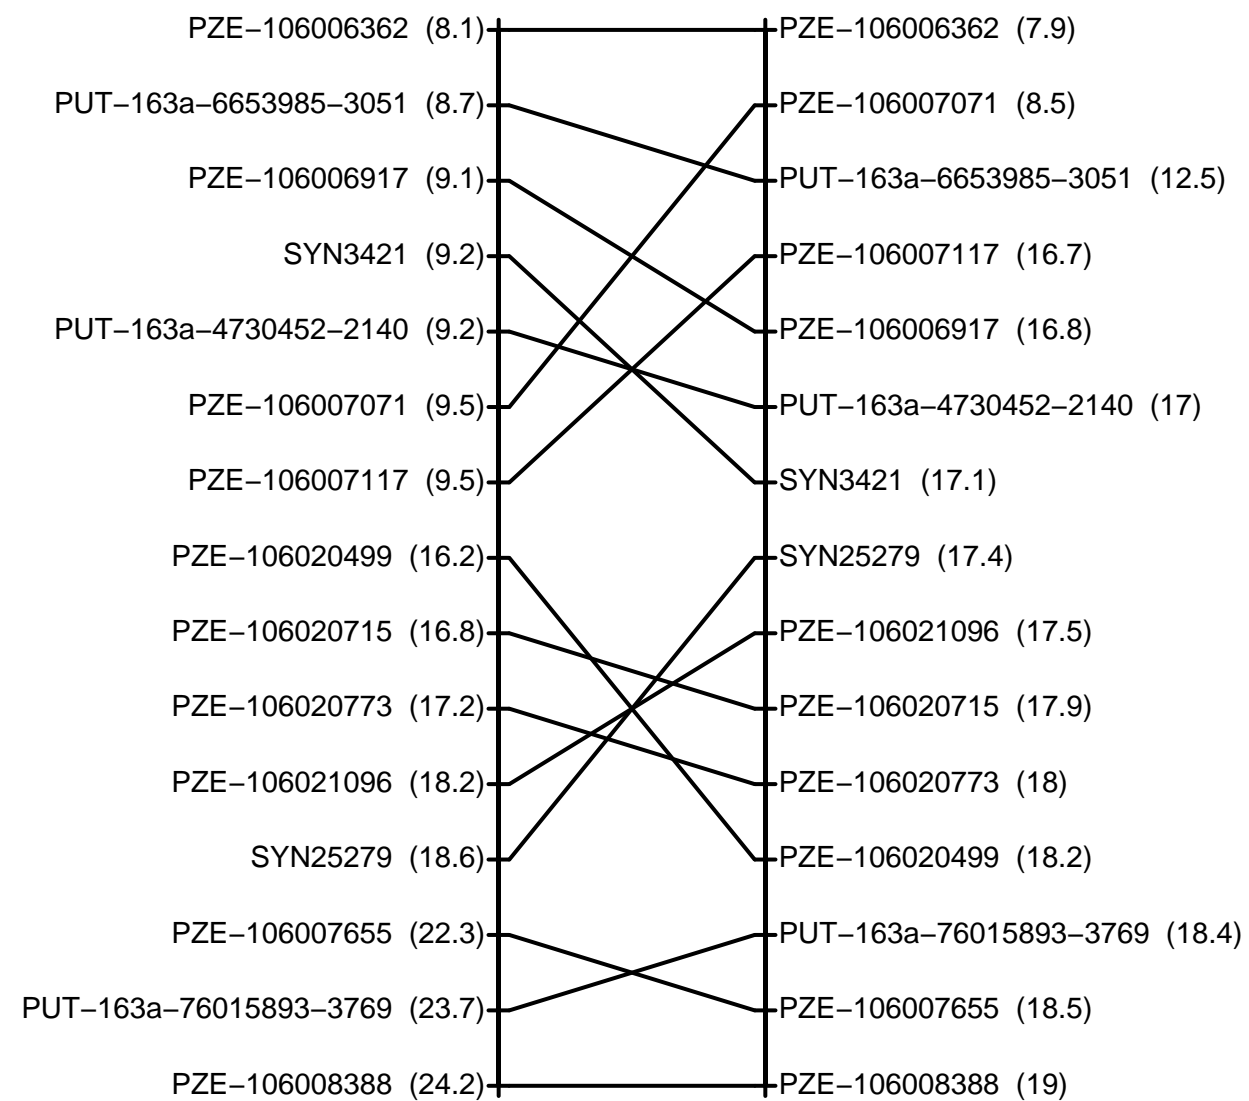

IBM

B73 genome

LHRF

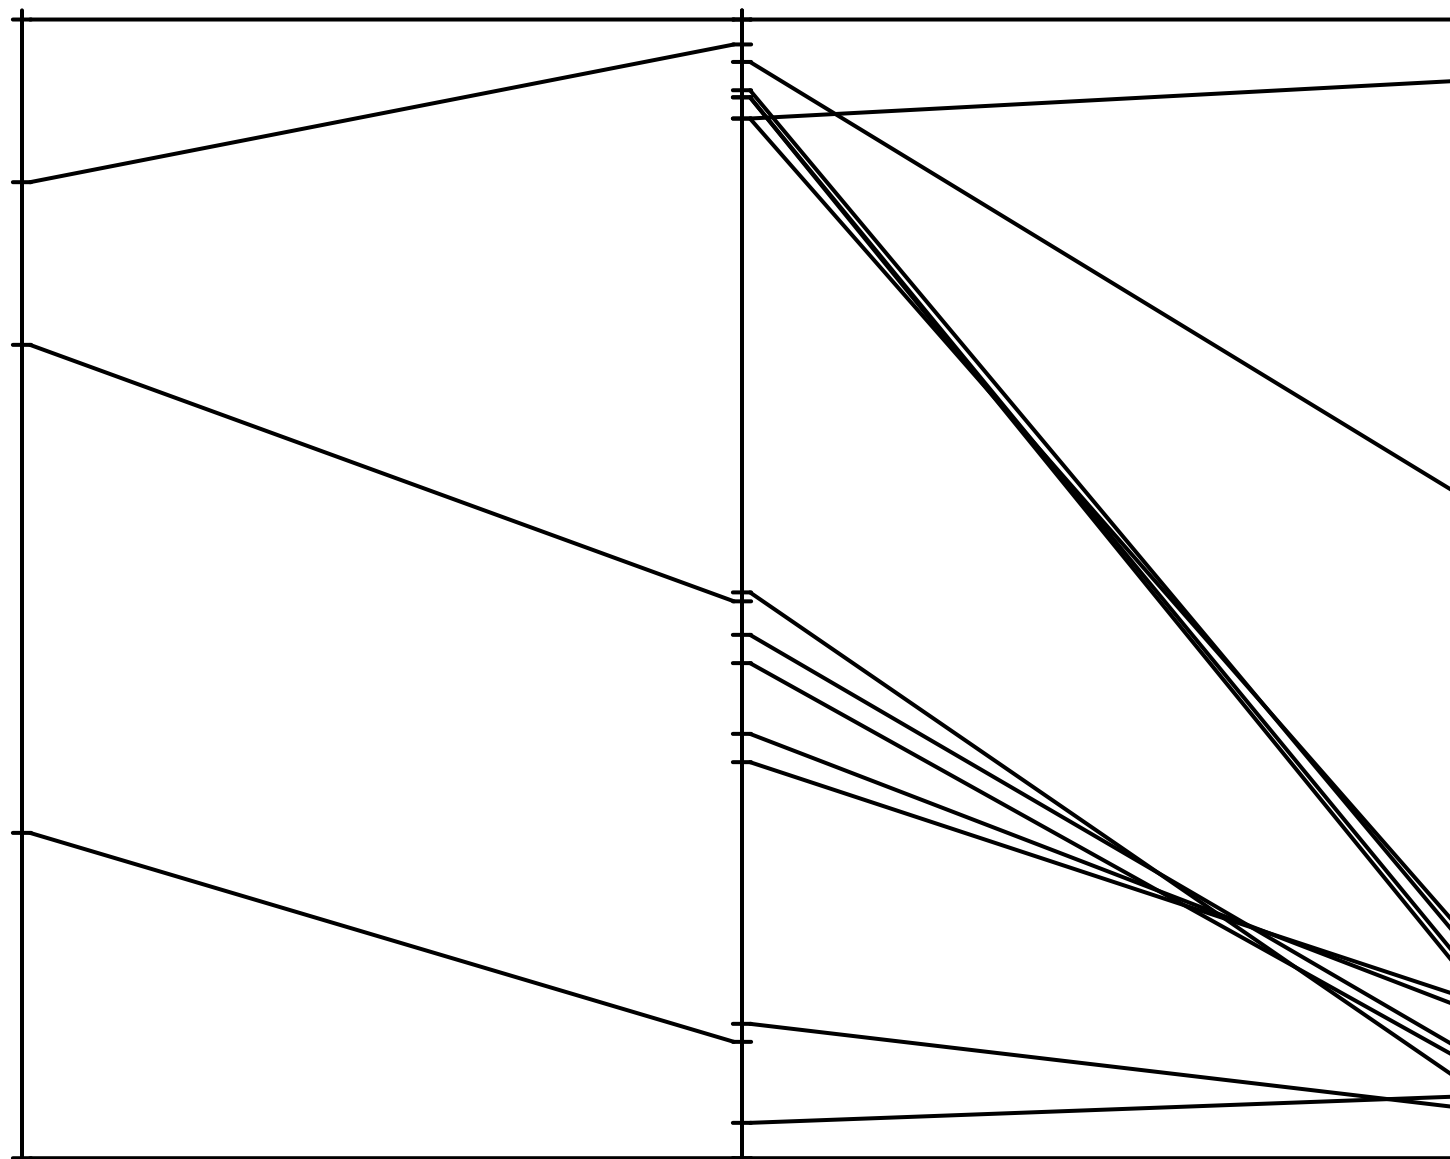

6.2

IBM (cM) B73 genome (Mbp)

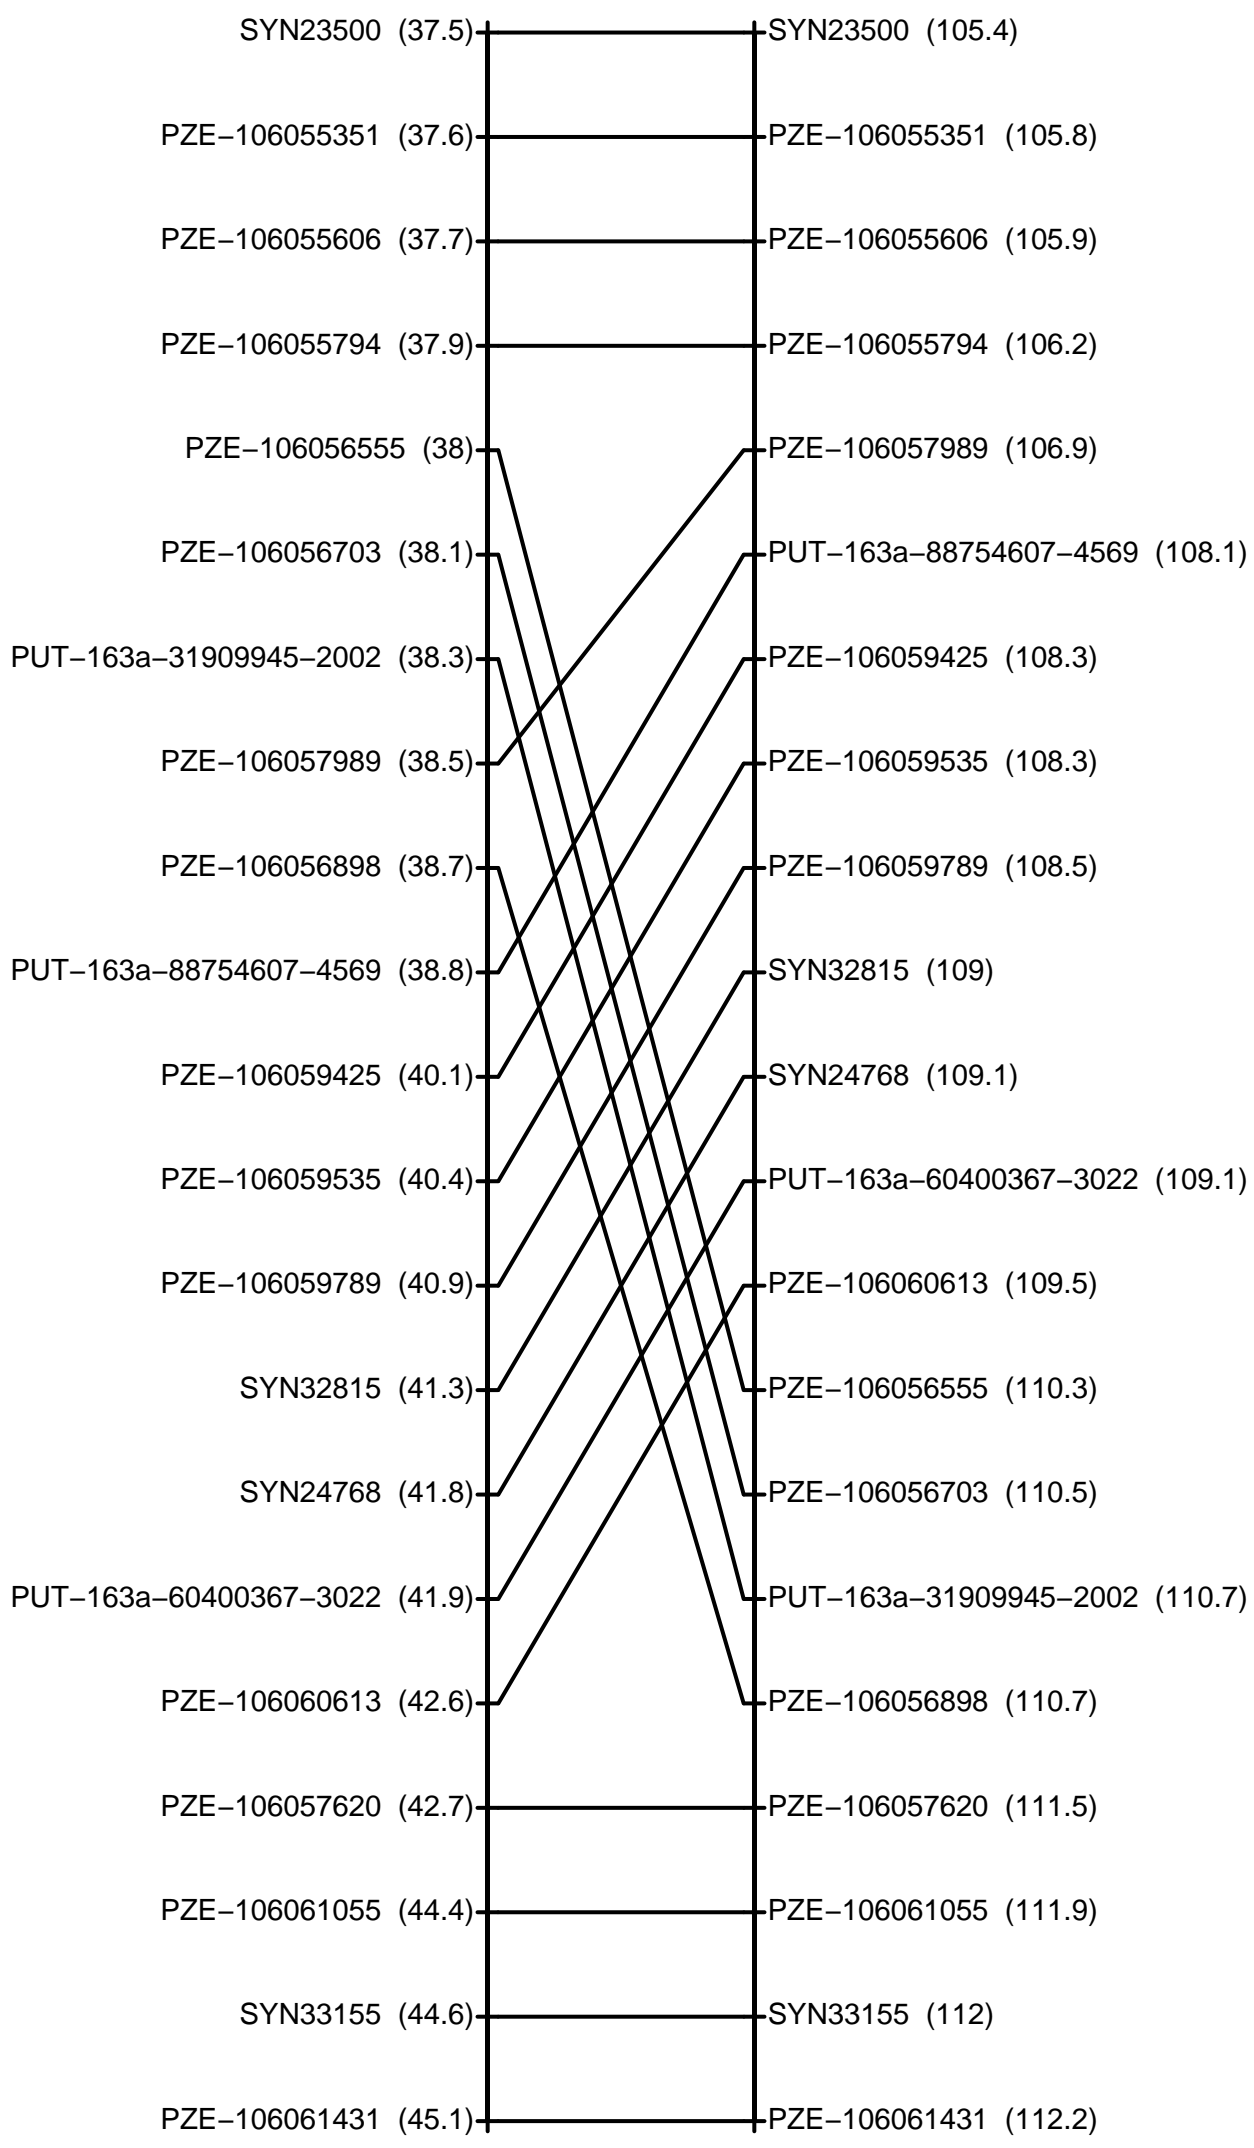

6.2

B73 genome (Mbp) LHRF (cM)

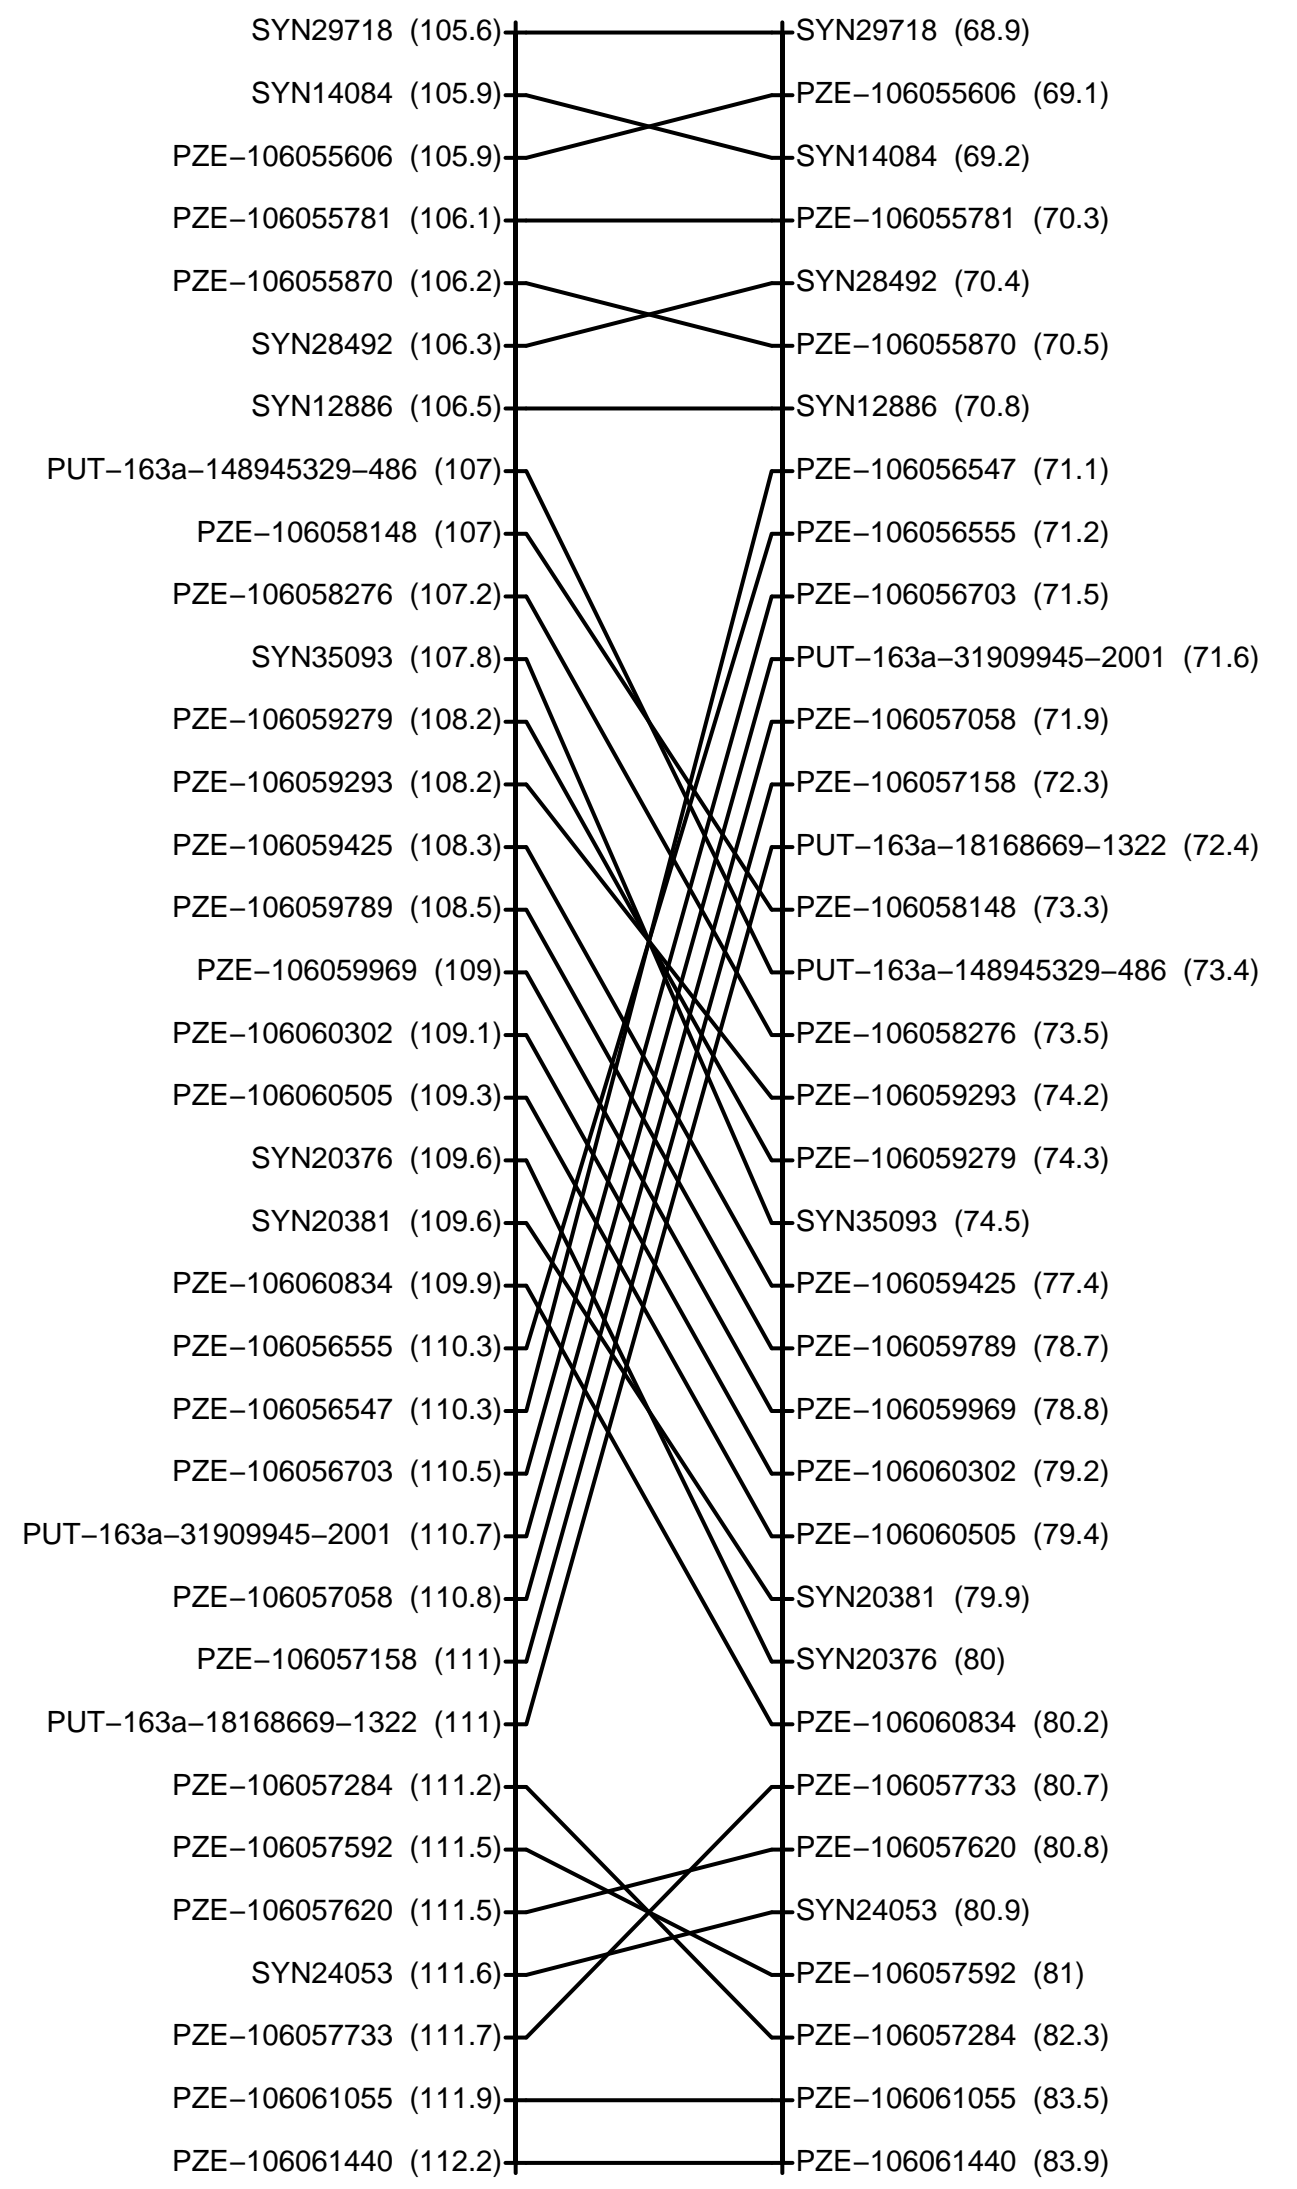

IBM

B73 genome

LHRF

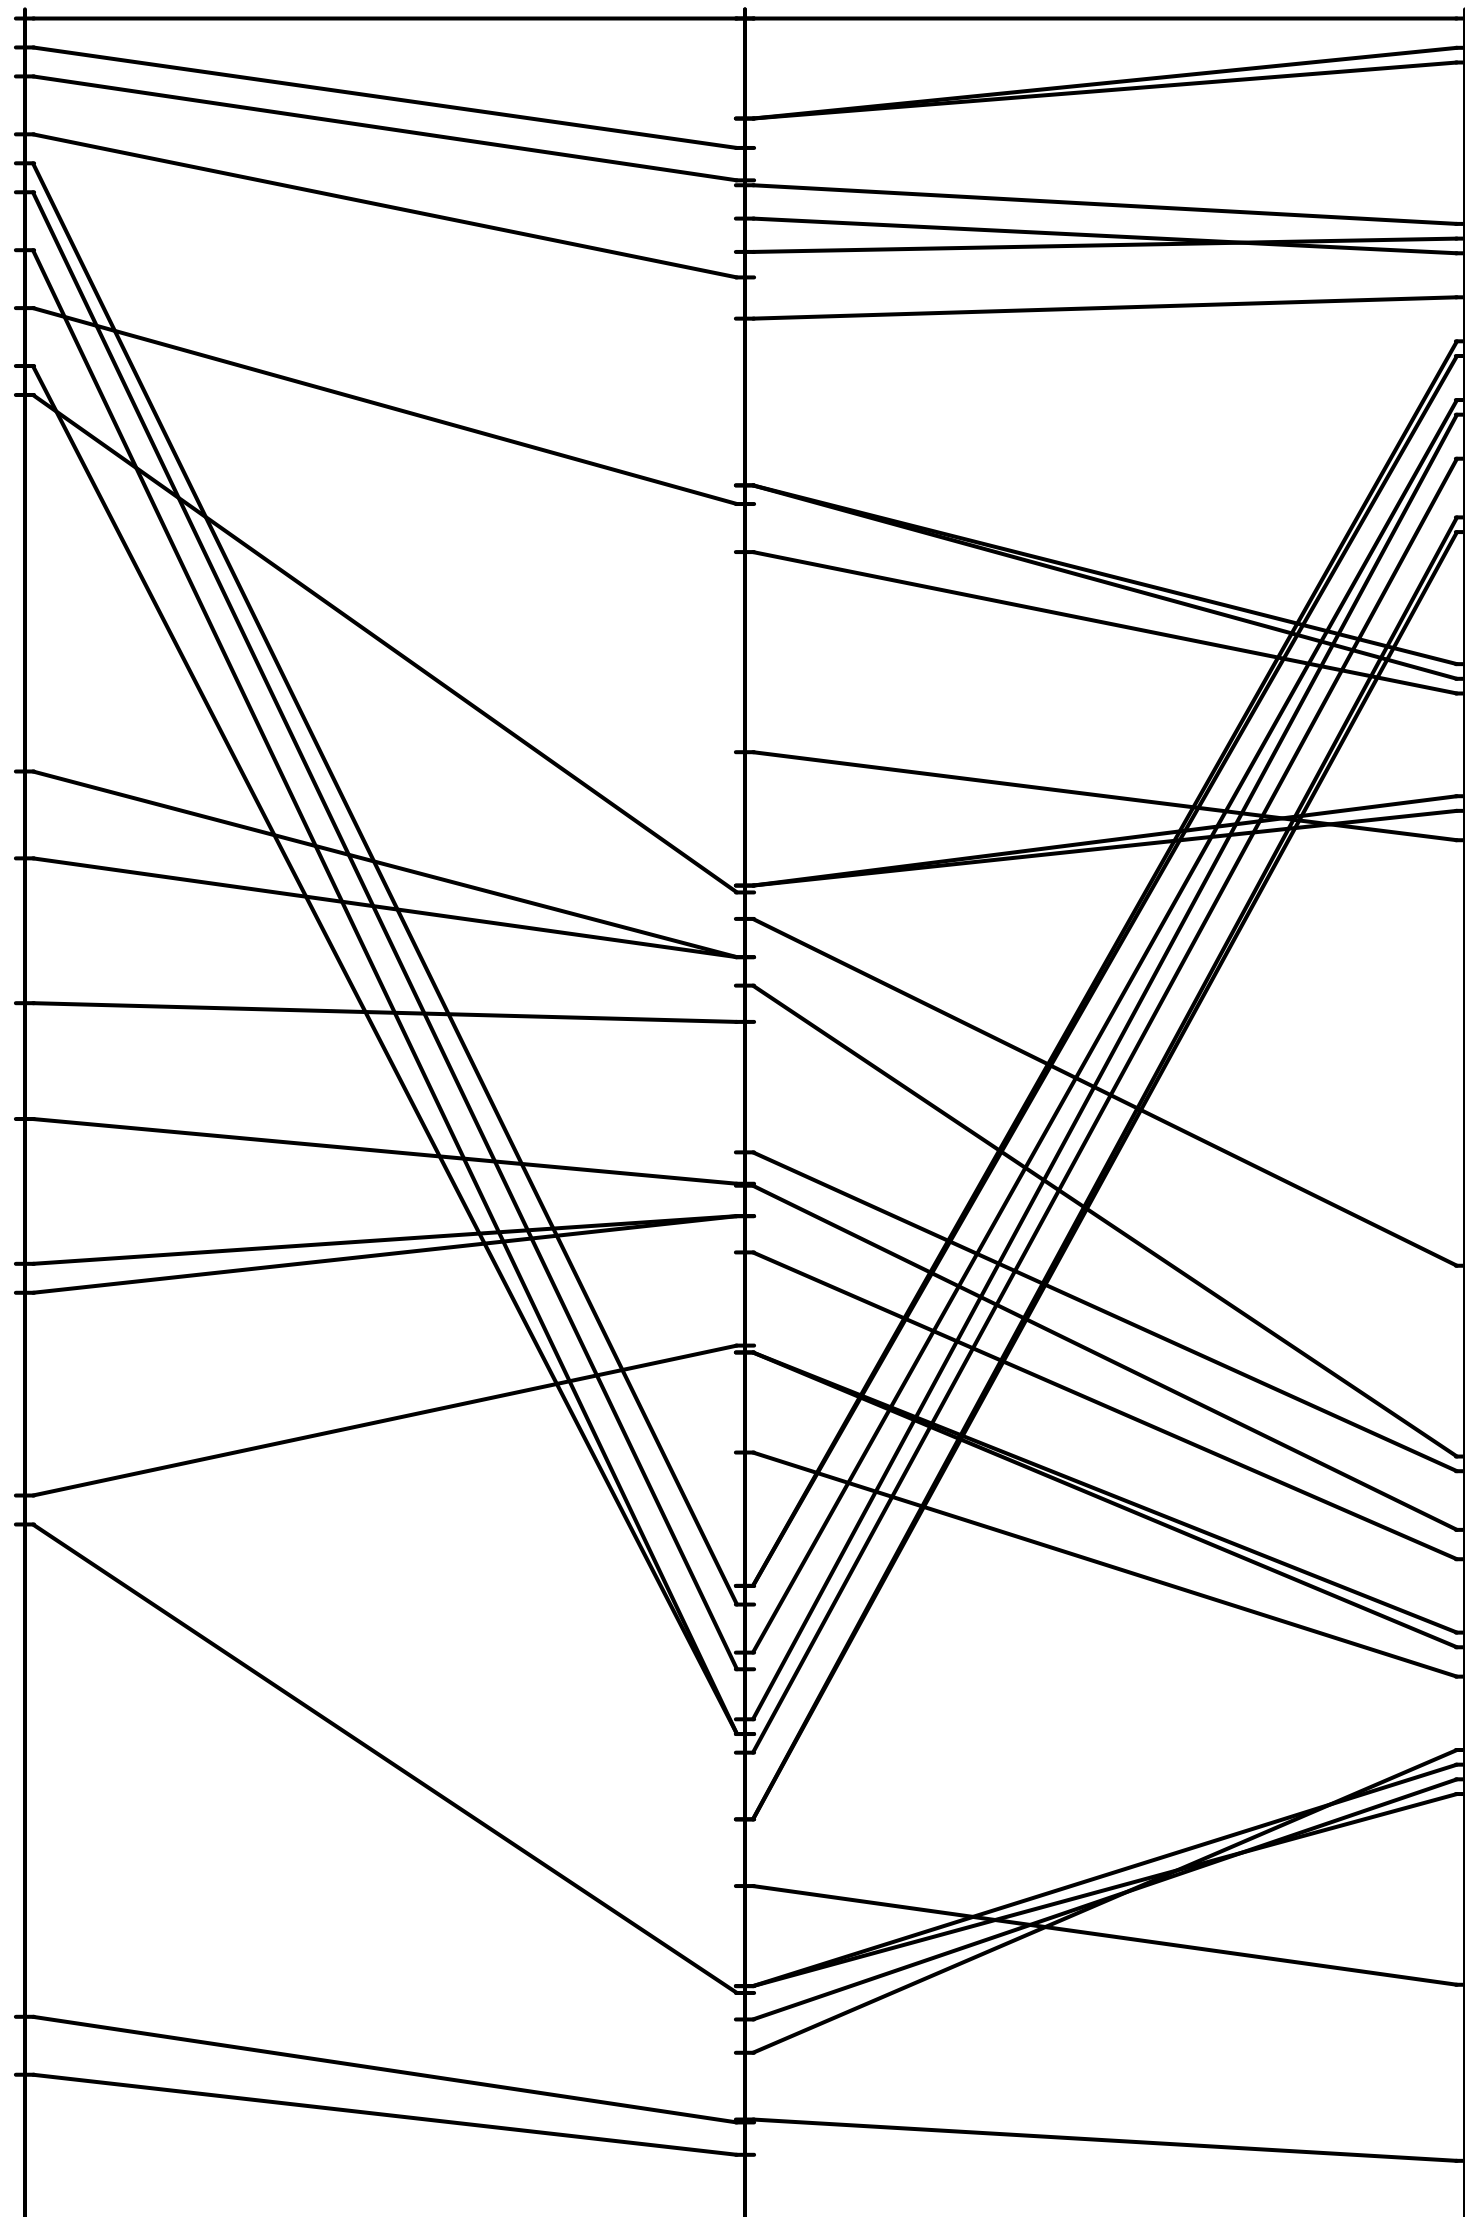

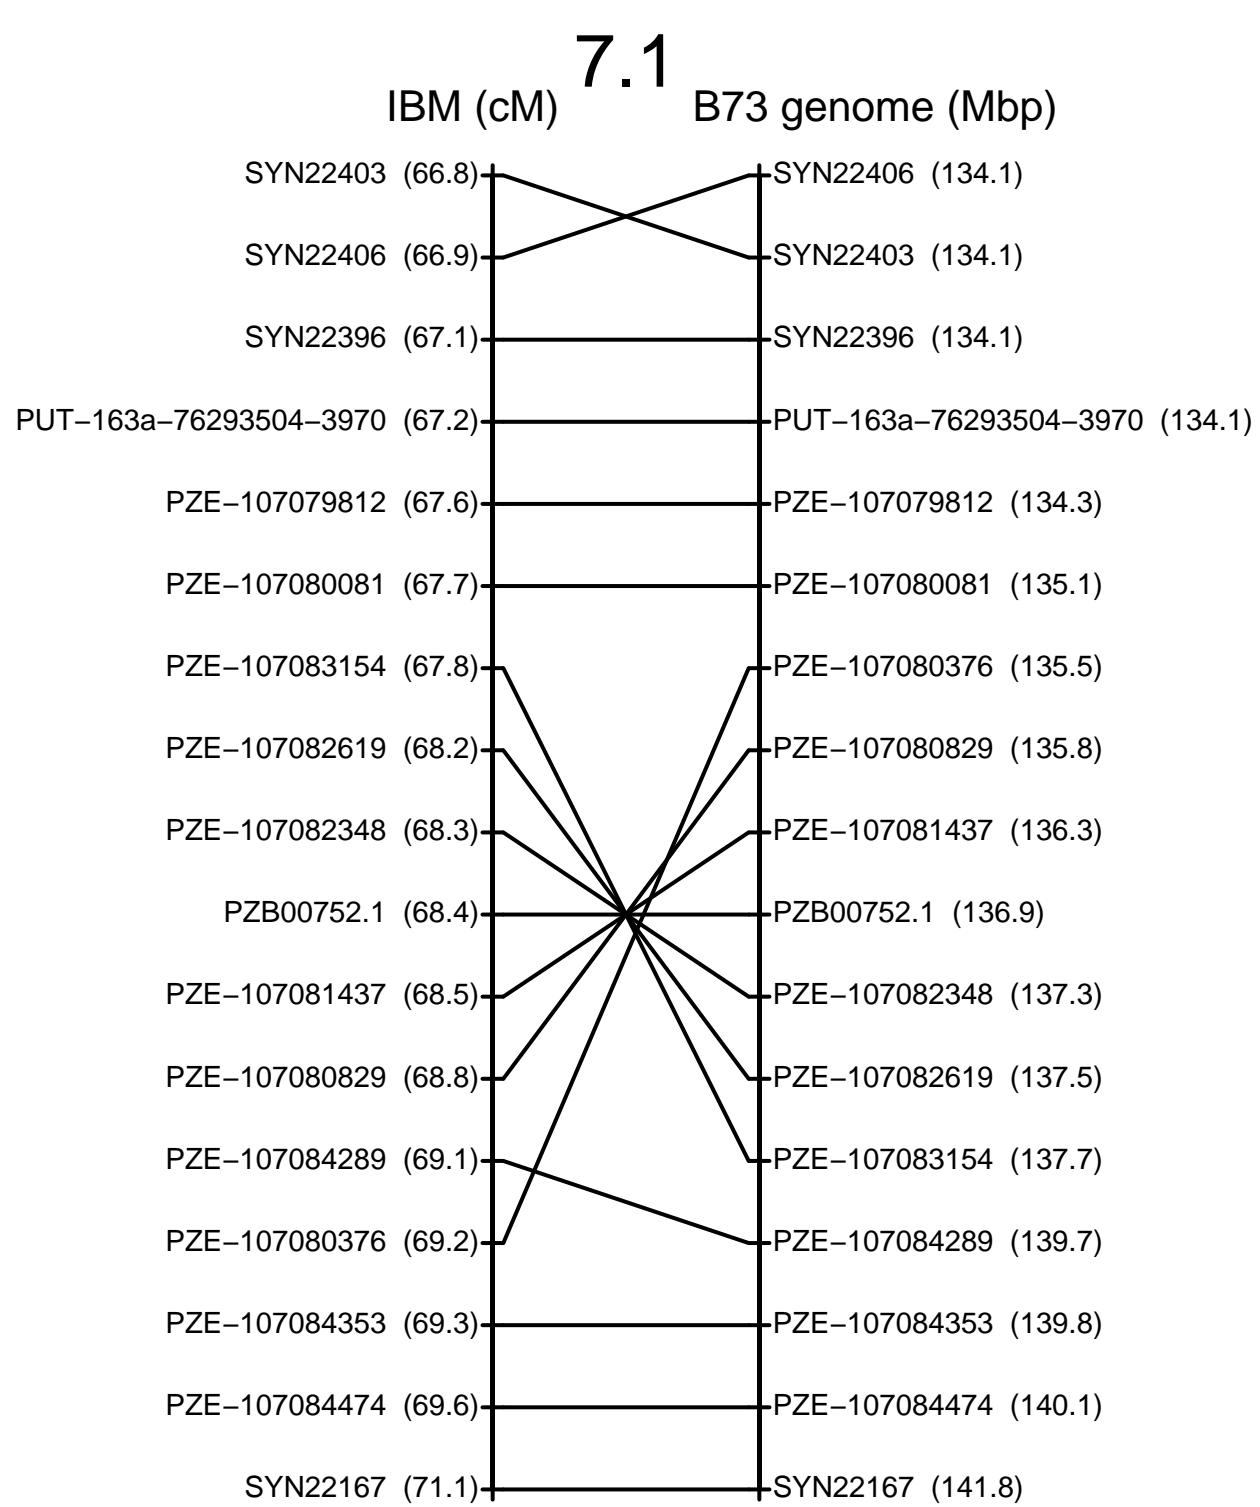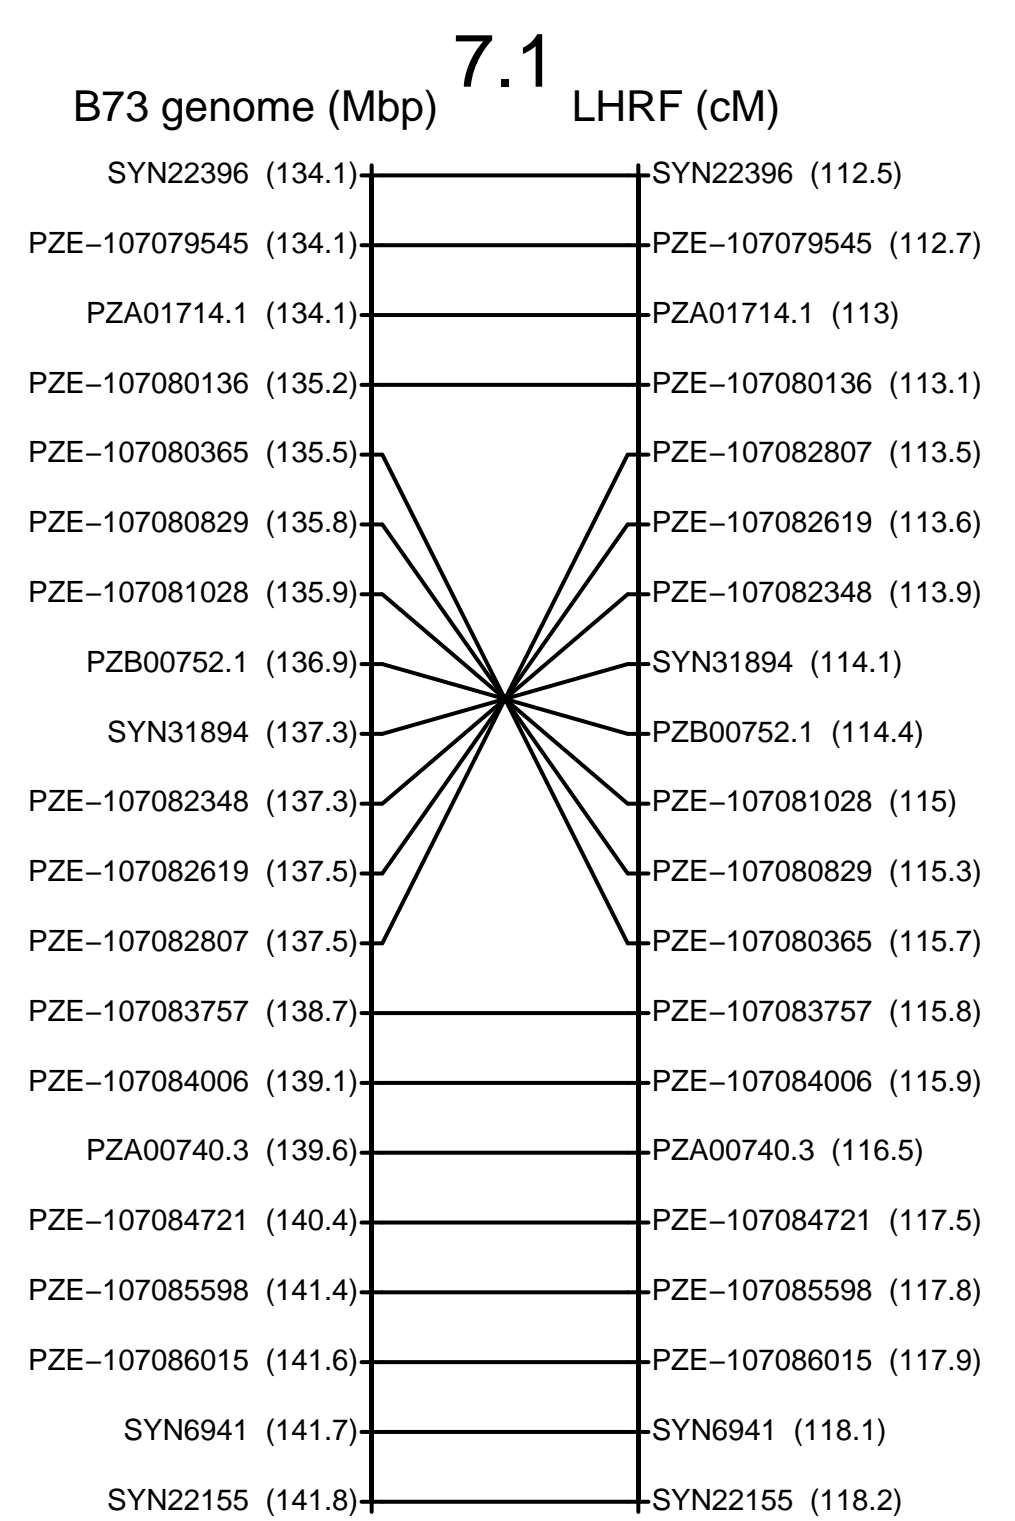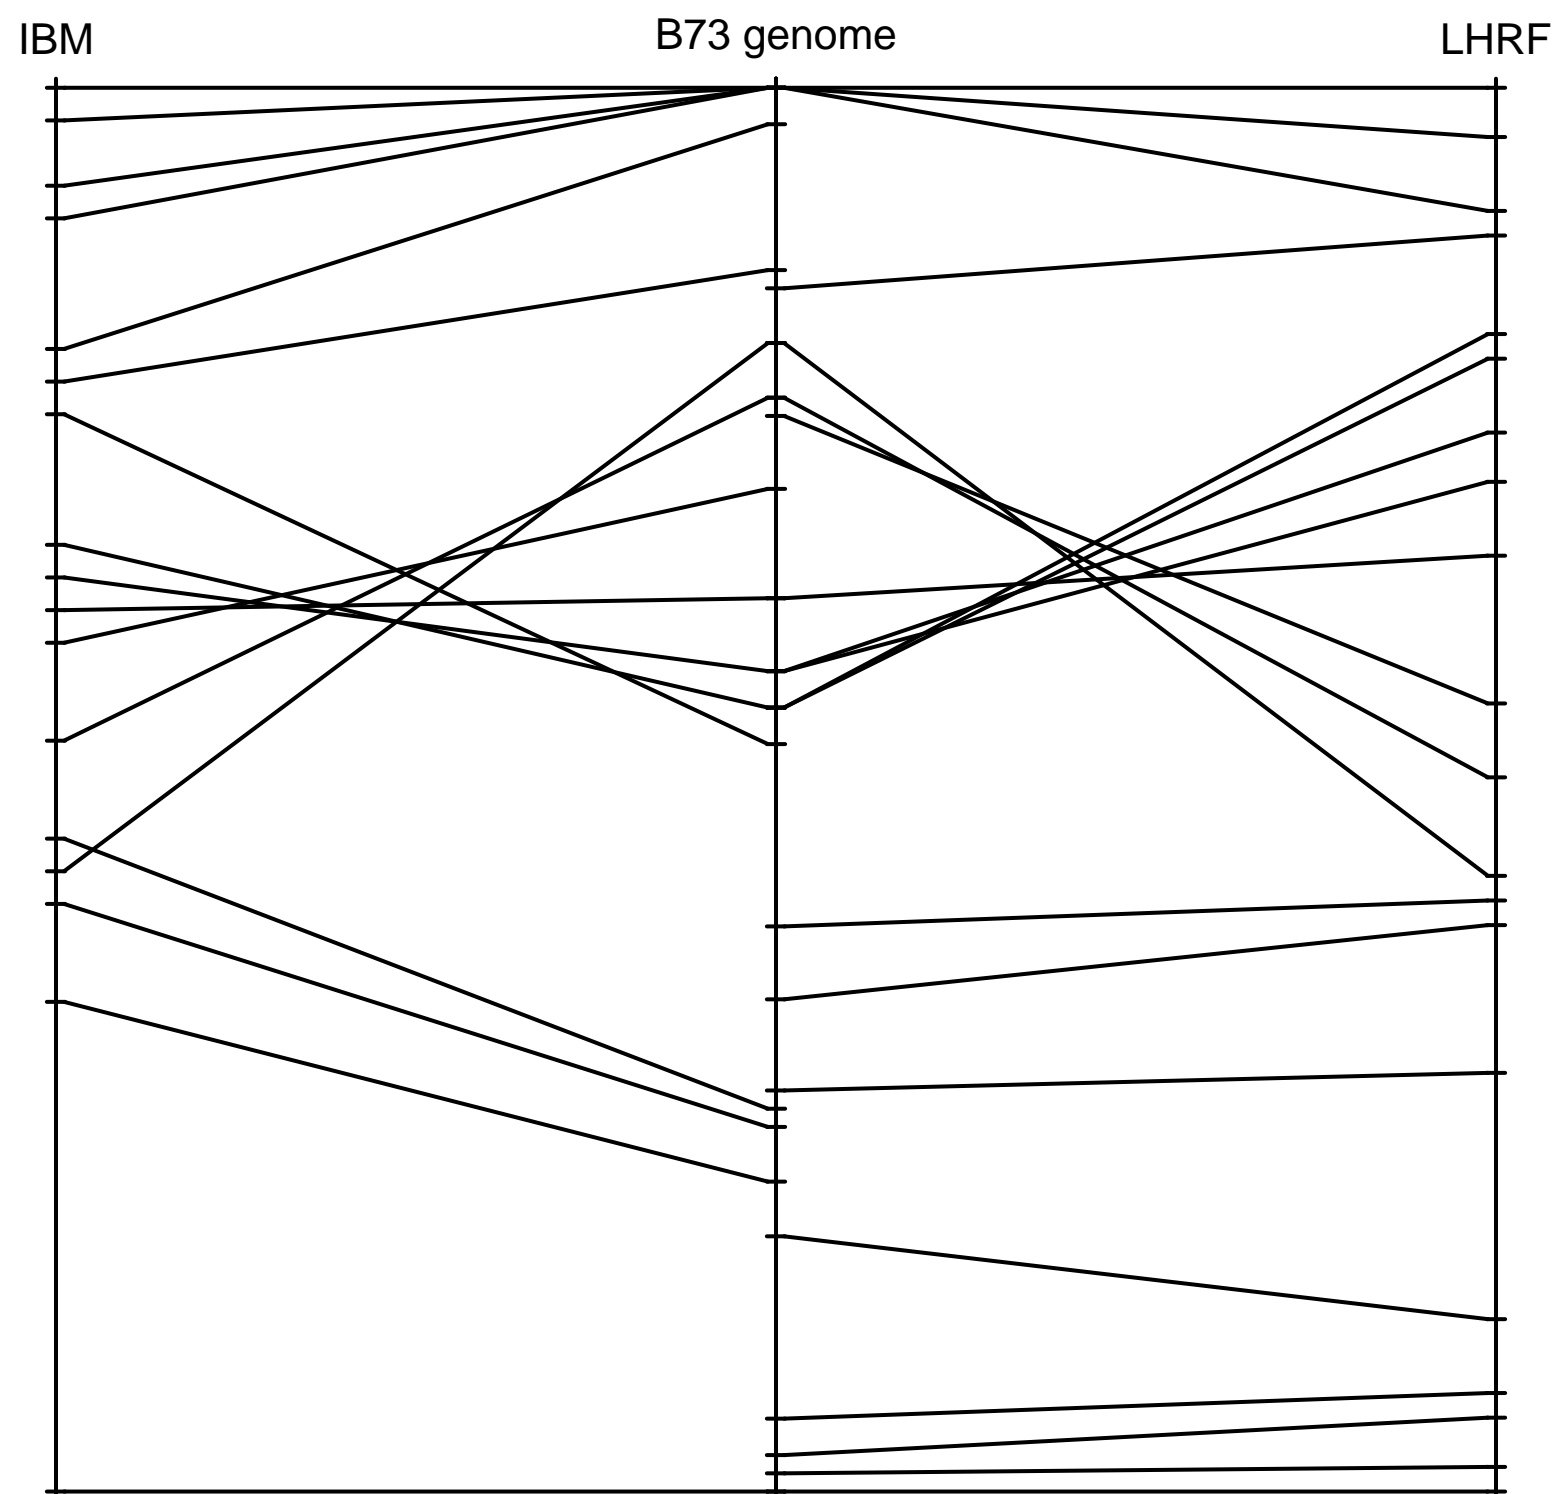



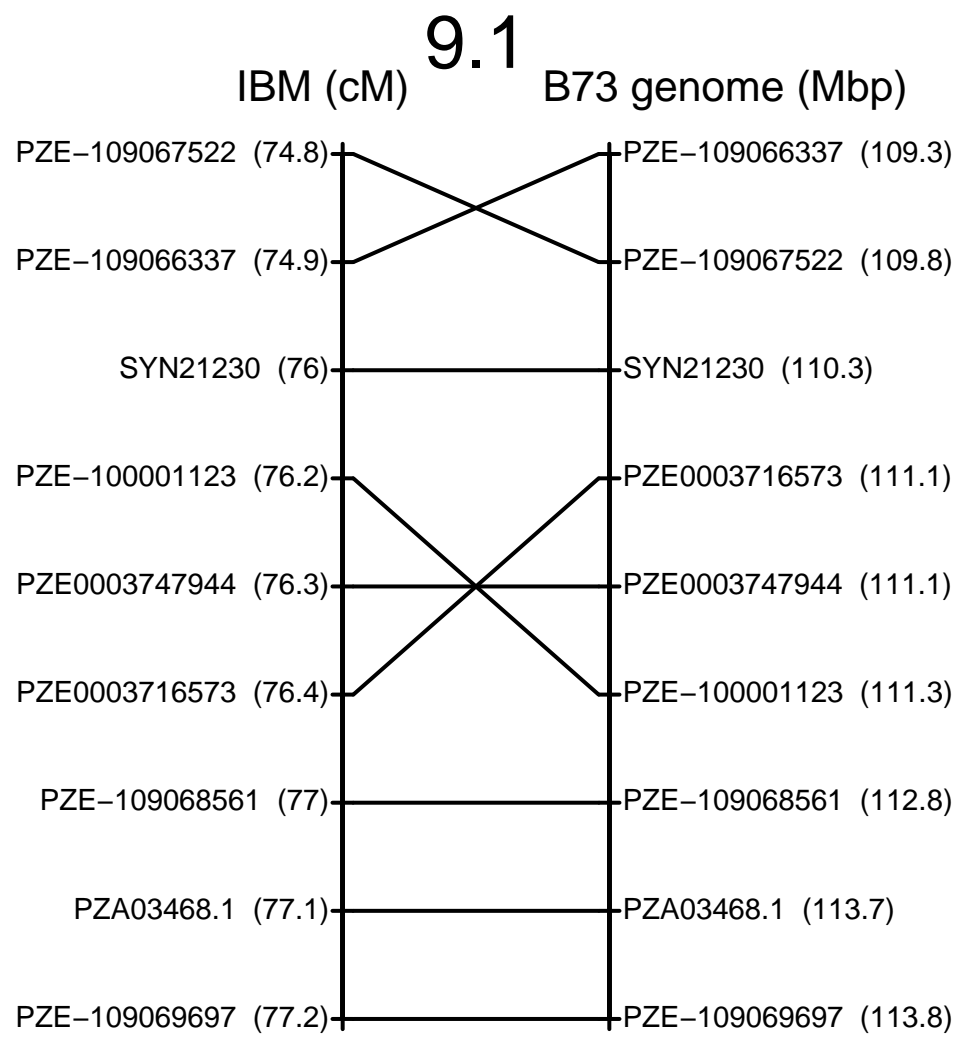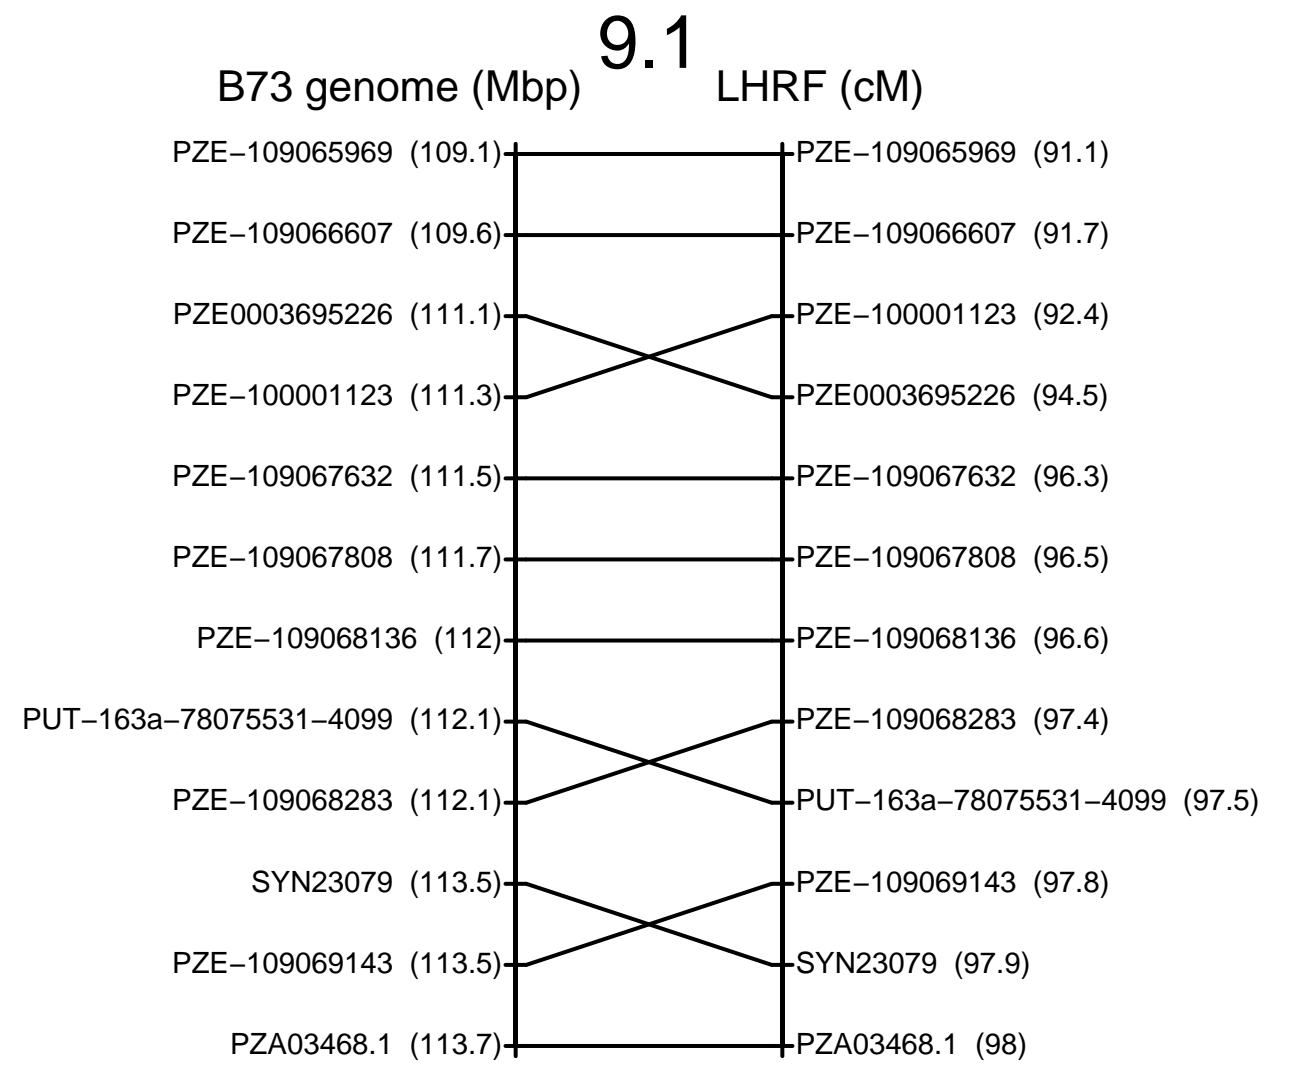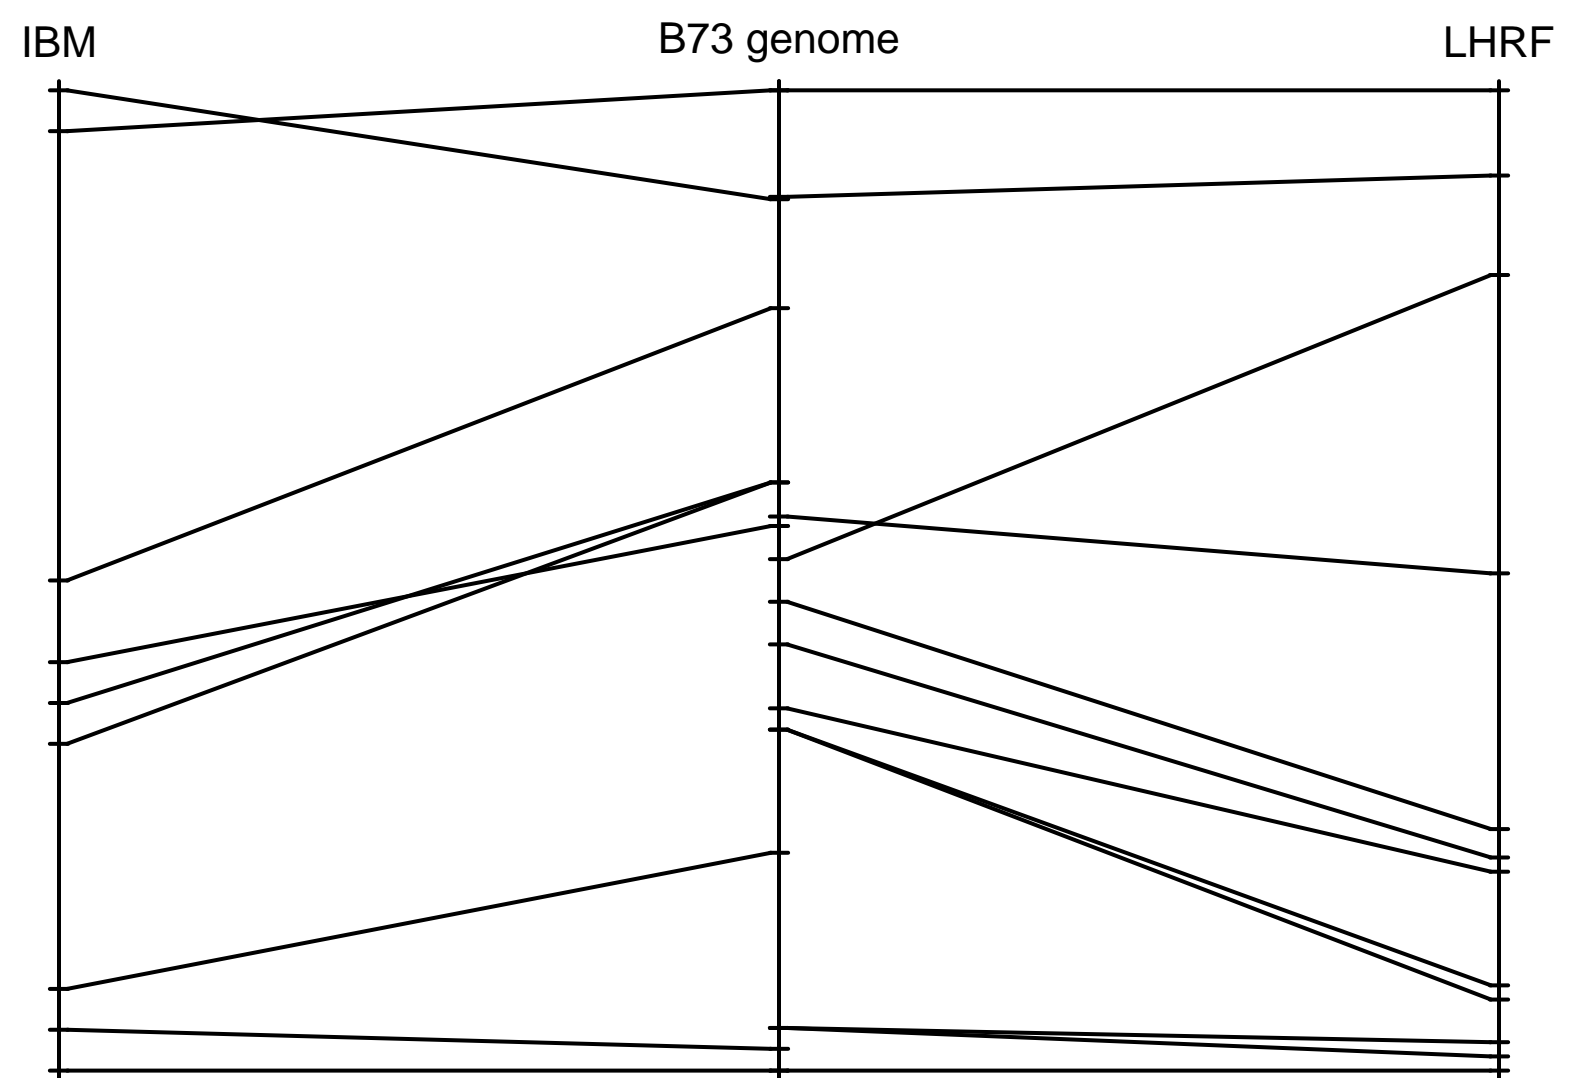

Supplement: pone.0028334.s006.pdf [file pone.0028334.s006.pdf]
