# Supplementary material for: A Large Maize (Zea mays L.) SNP Genotyping Array: Development and Germplasm Genotyping, and Genetic Mapping to Compare with the B73 Reference Genome
Source: PubMed Central journal article supplement (PMC3234264; doi:10.1371/journal.pone.0028334), 2011-12-08

# PZE markers

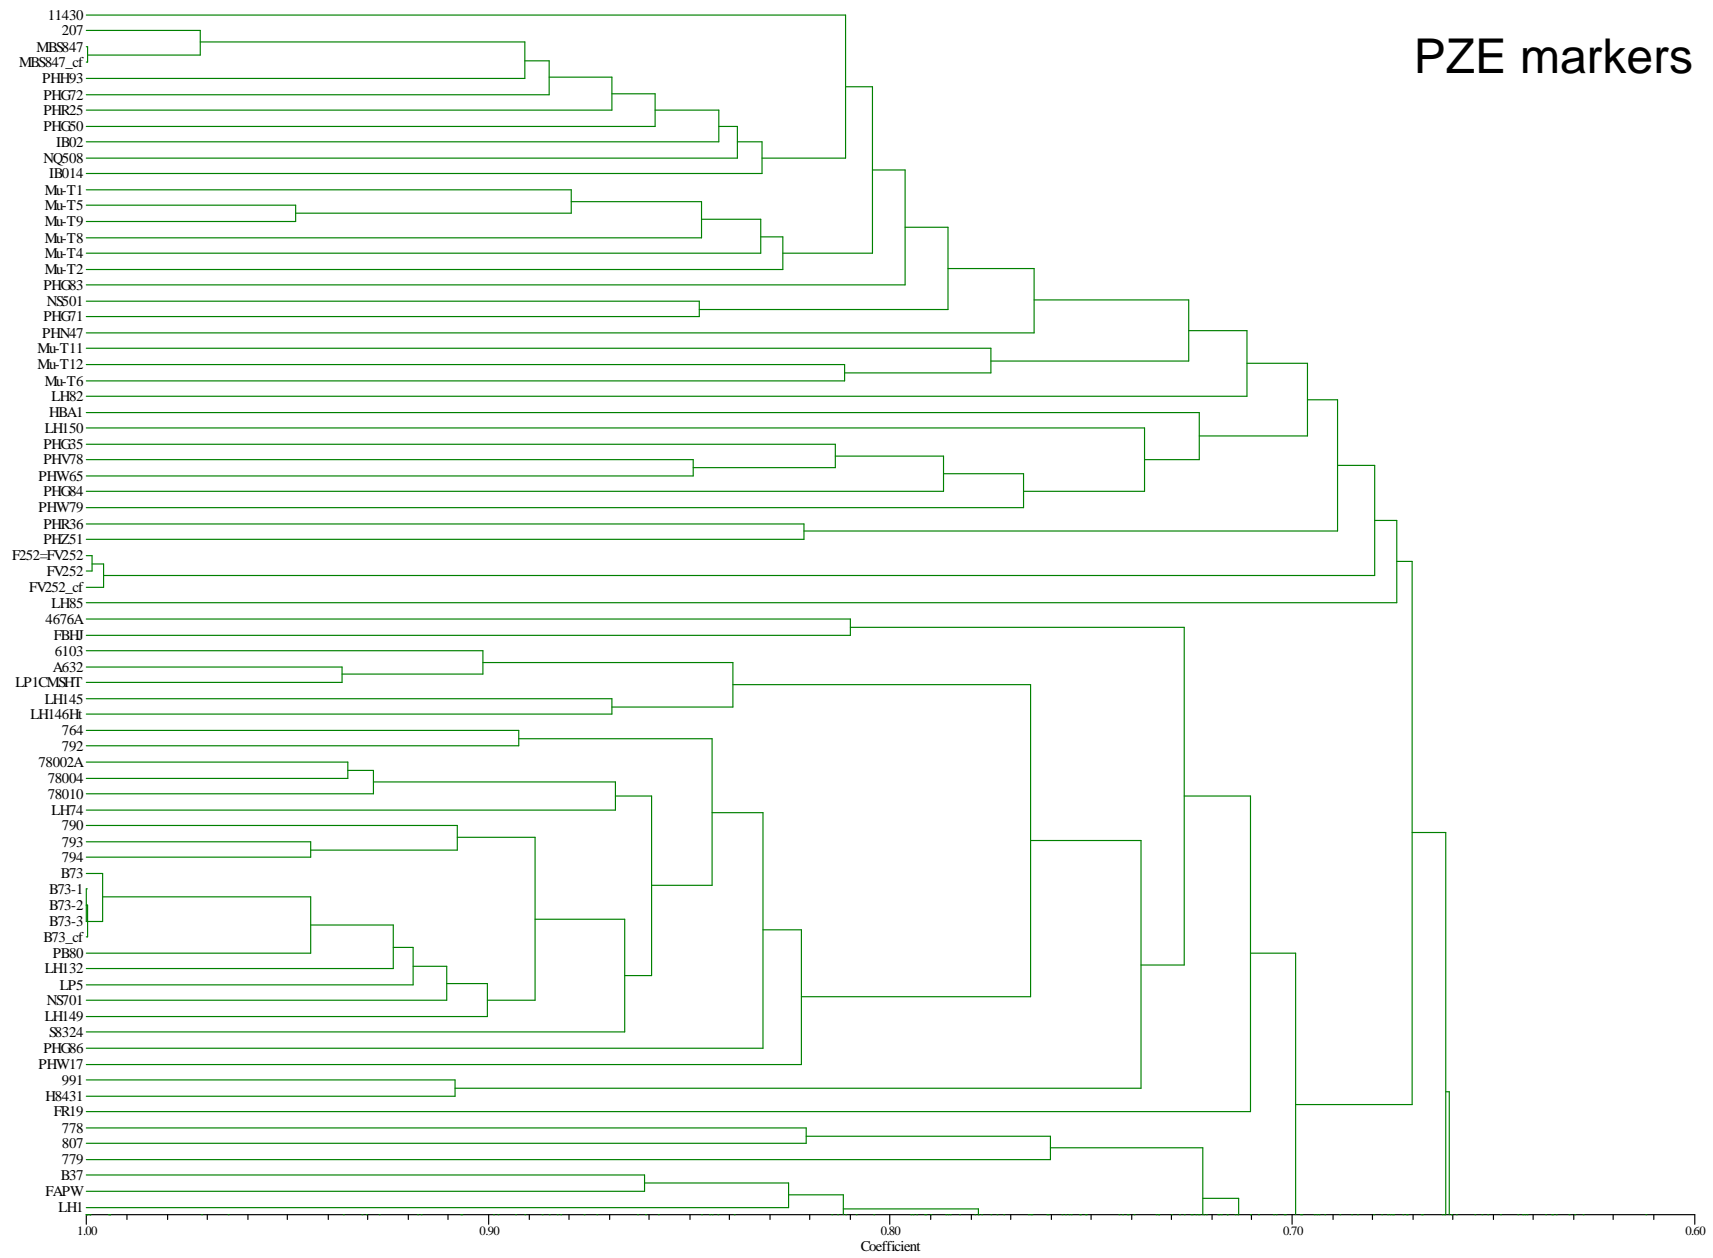

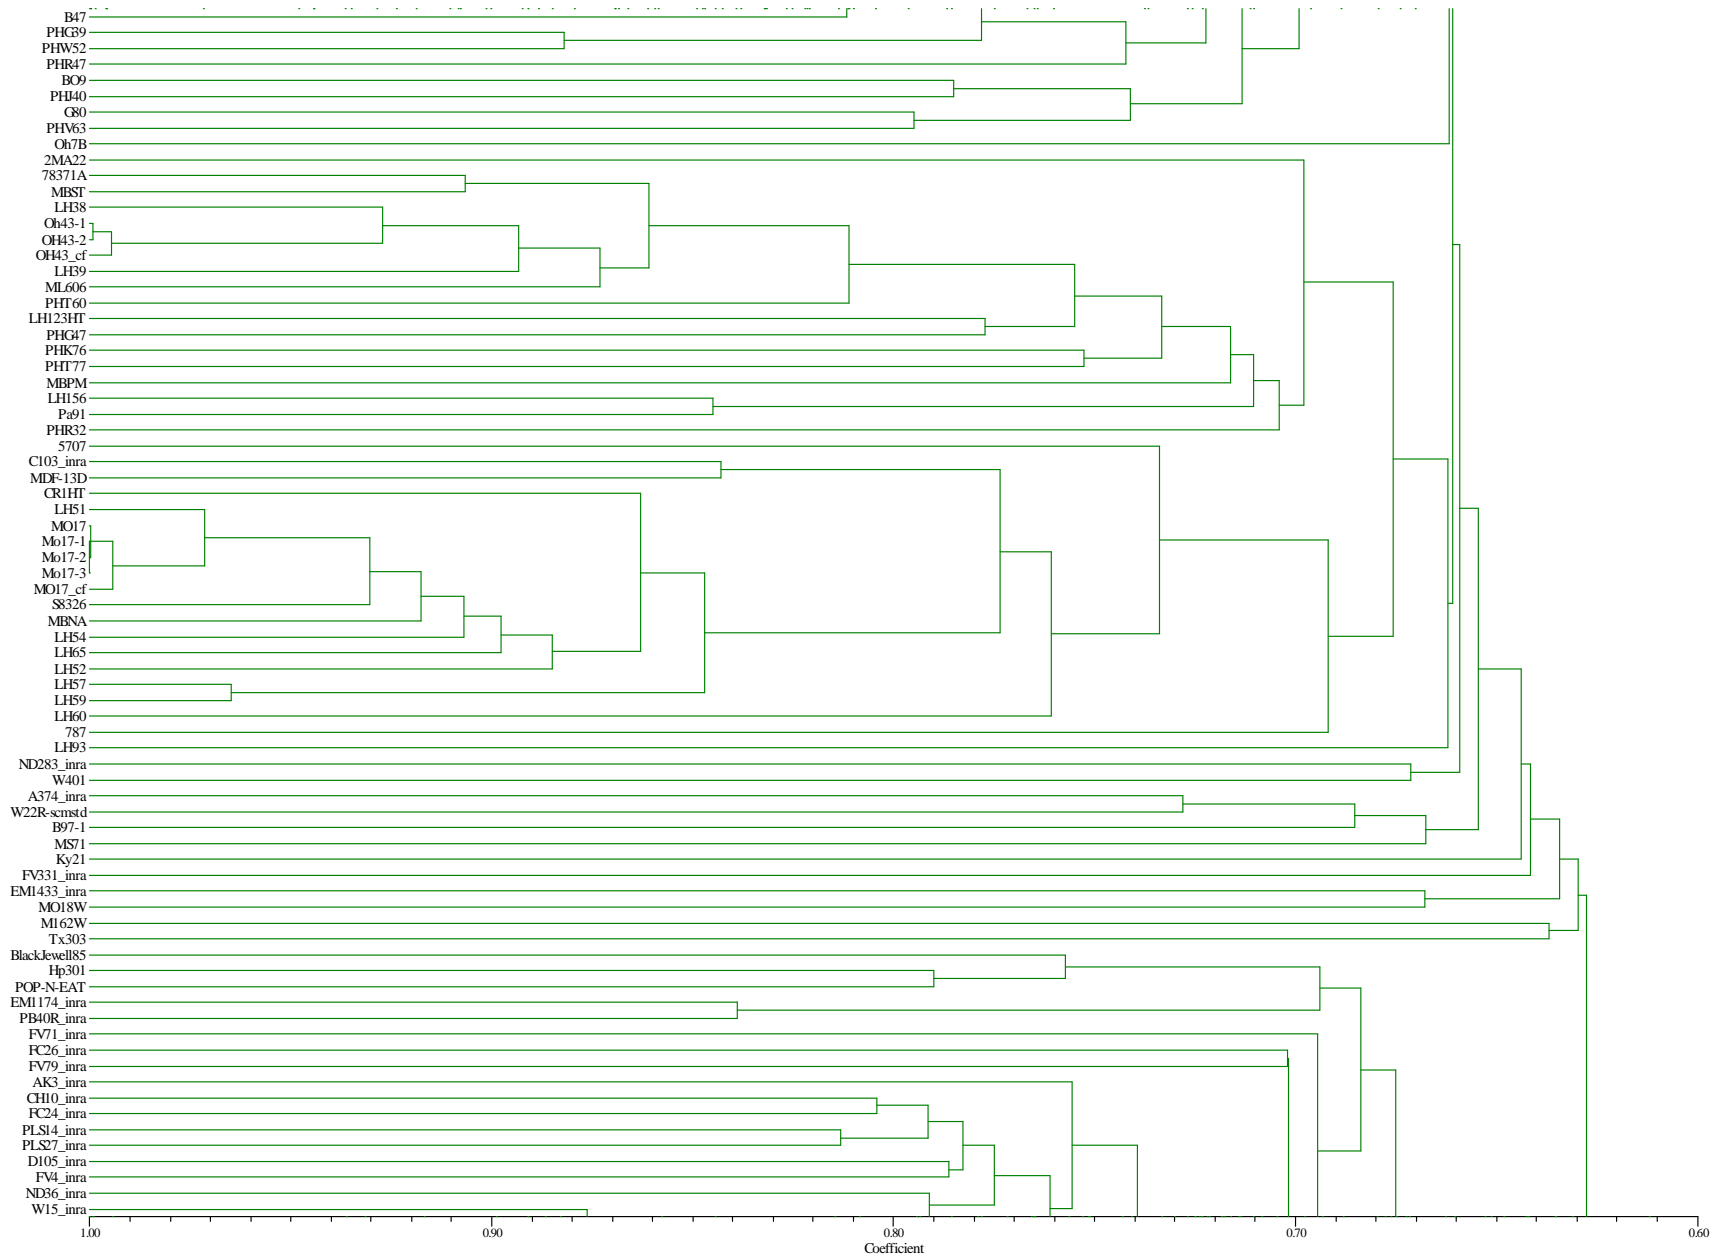

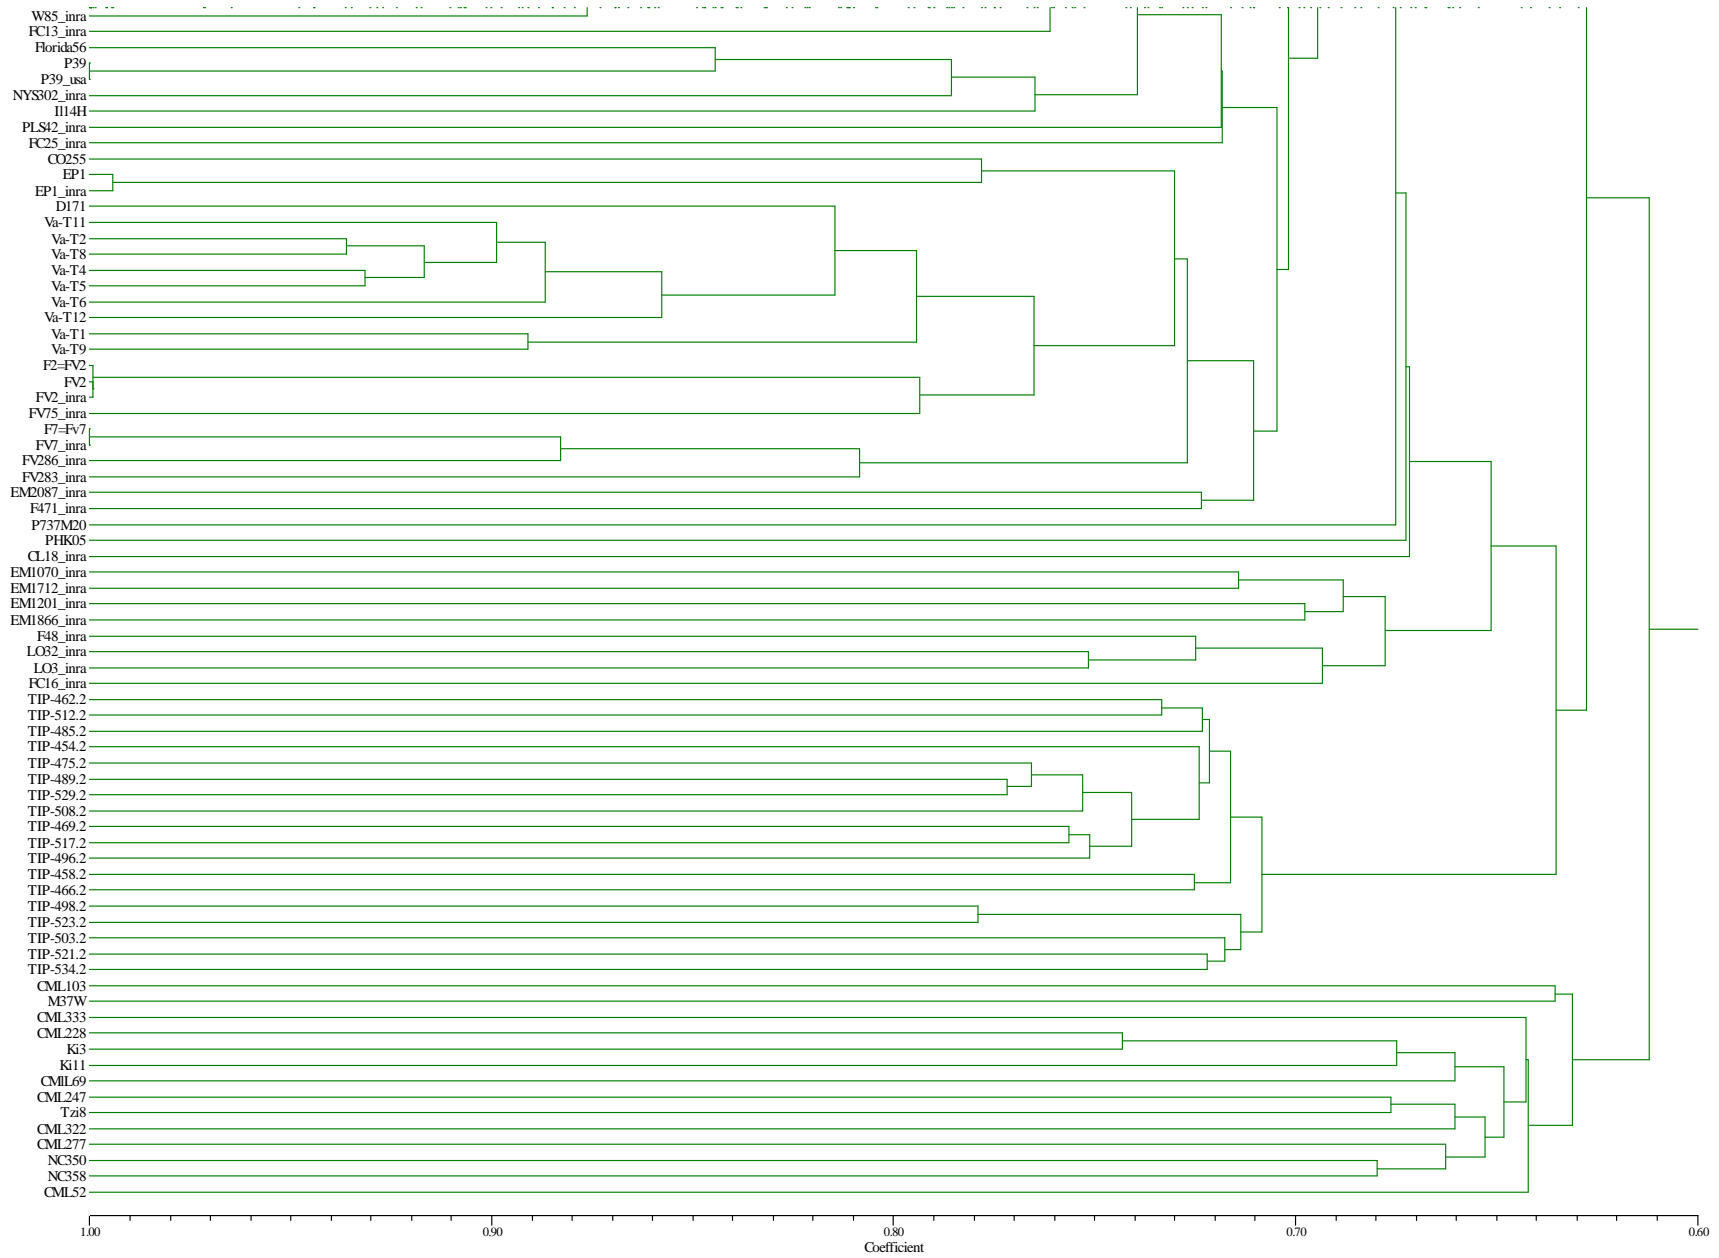

Supplement: pone.0028334.s001.pdf [file pone.0028334.s001.pdf]
