# Supplementary material for: A Large Maize (Zea mays L.) SNP Genotyping Array: Development and Germplasm Genotyping, and Genetic Mapping to Compare with the B73 Reference Genome
Source: PubMed Central journal article supplement (PMC3234264; doi:10.1371/journal.pone.0028334), 2011-12-08

# Chromosome 1

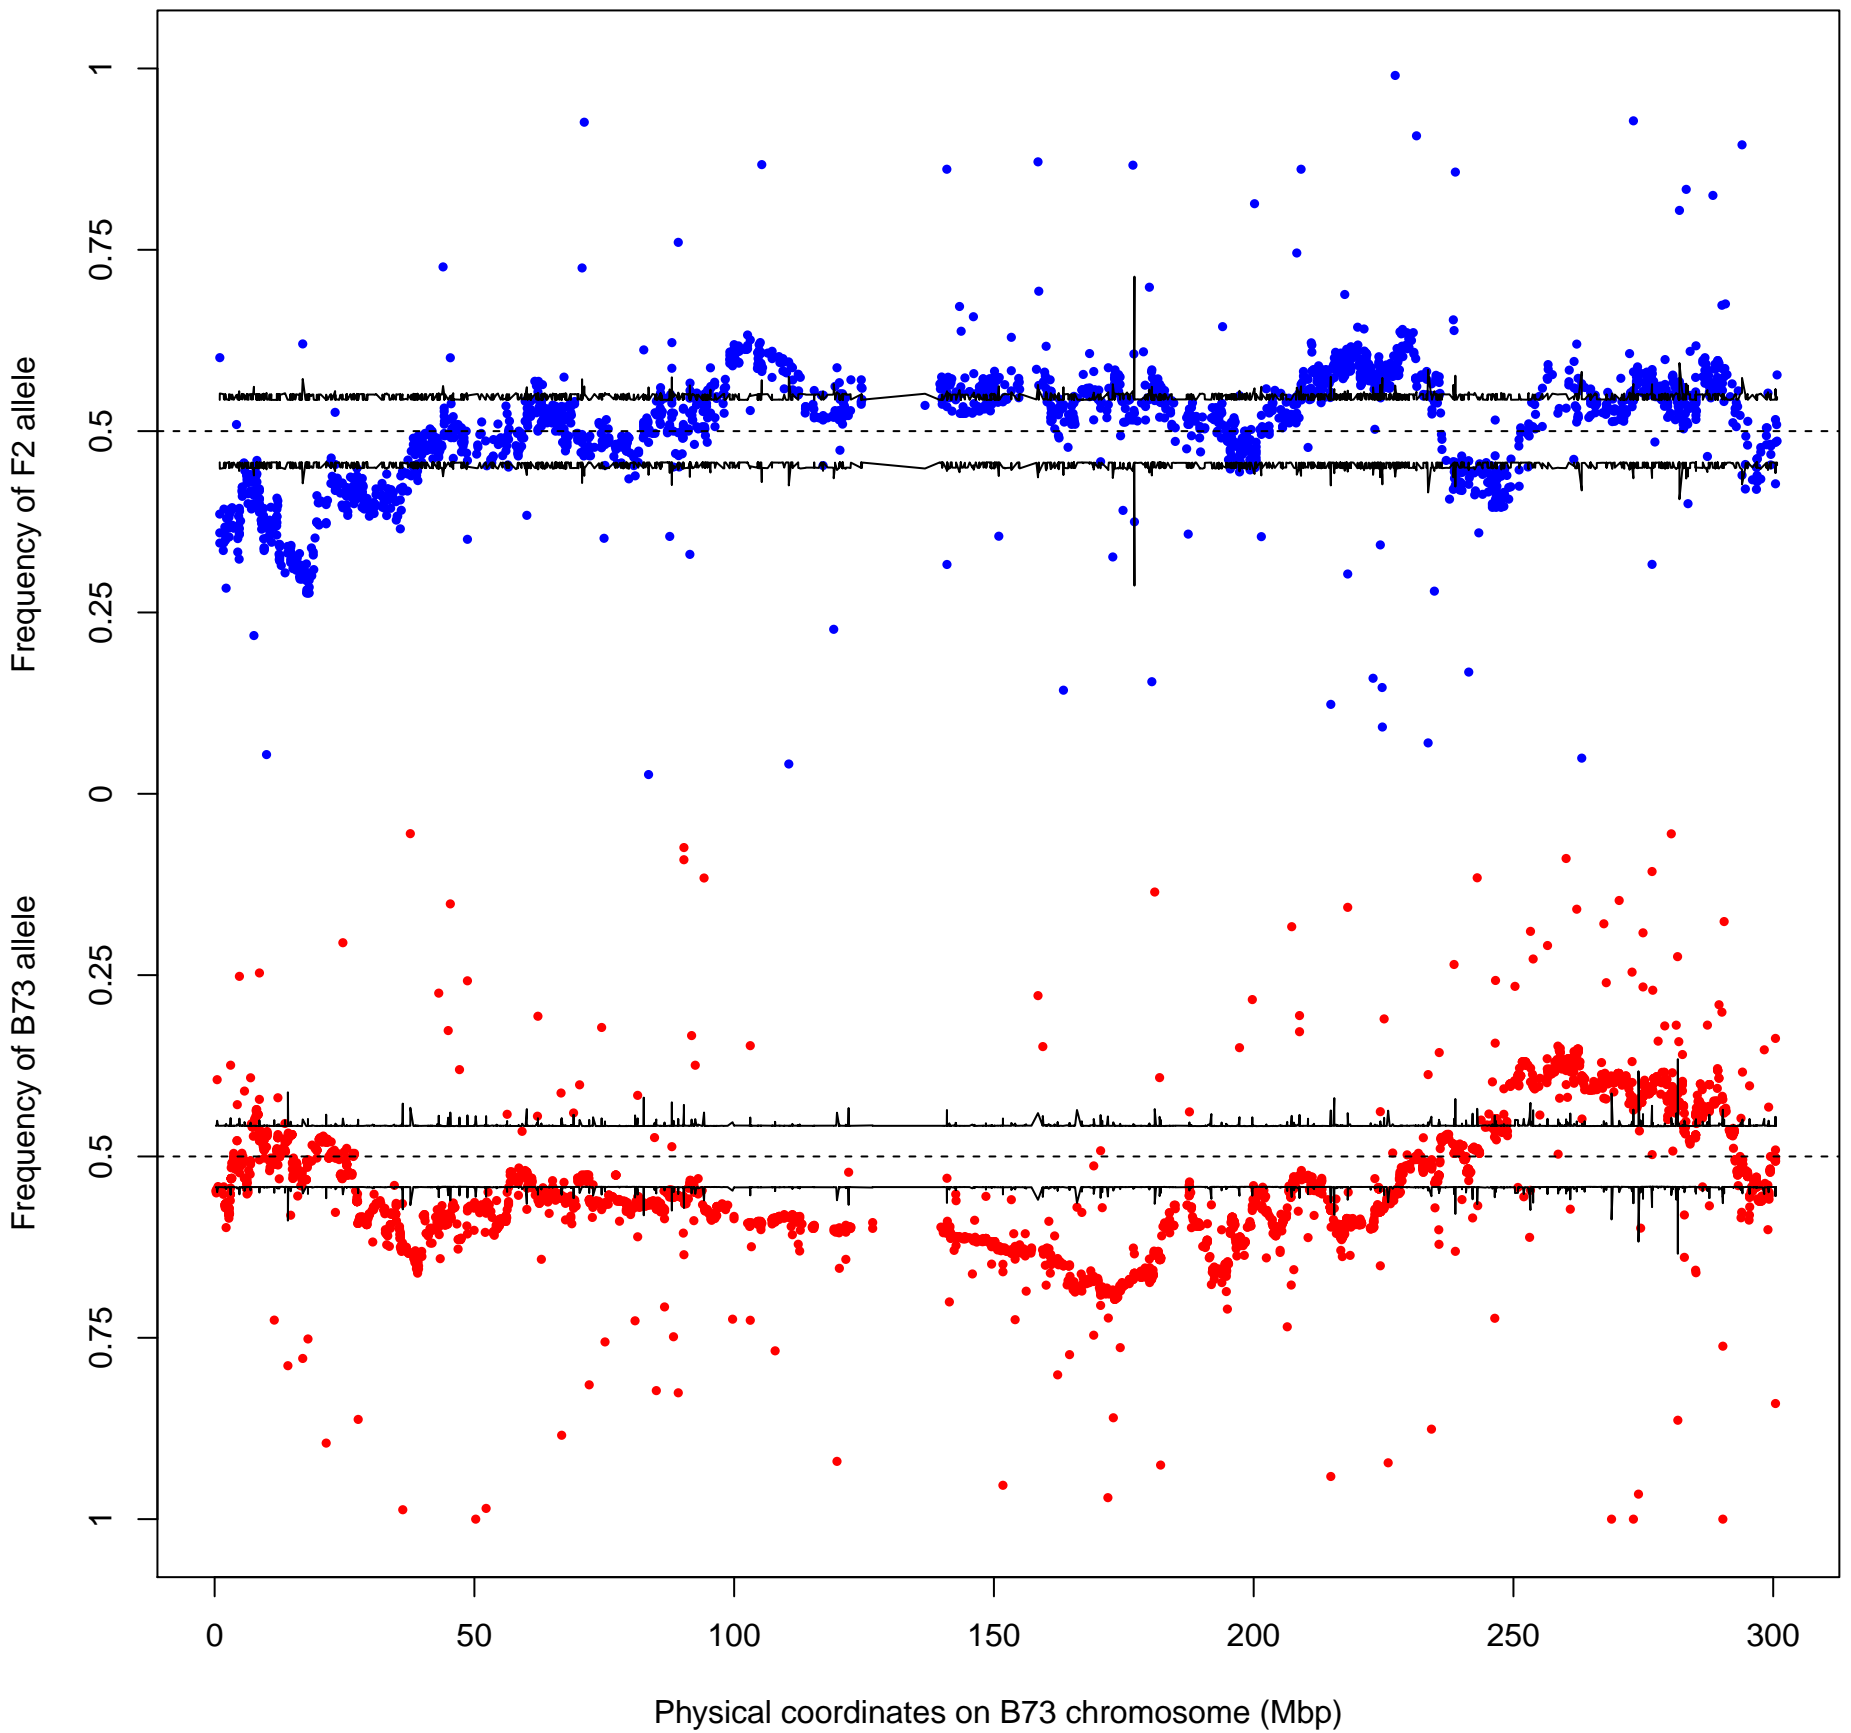

# Chromosome 2

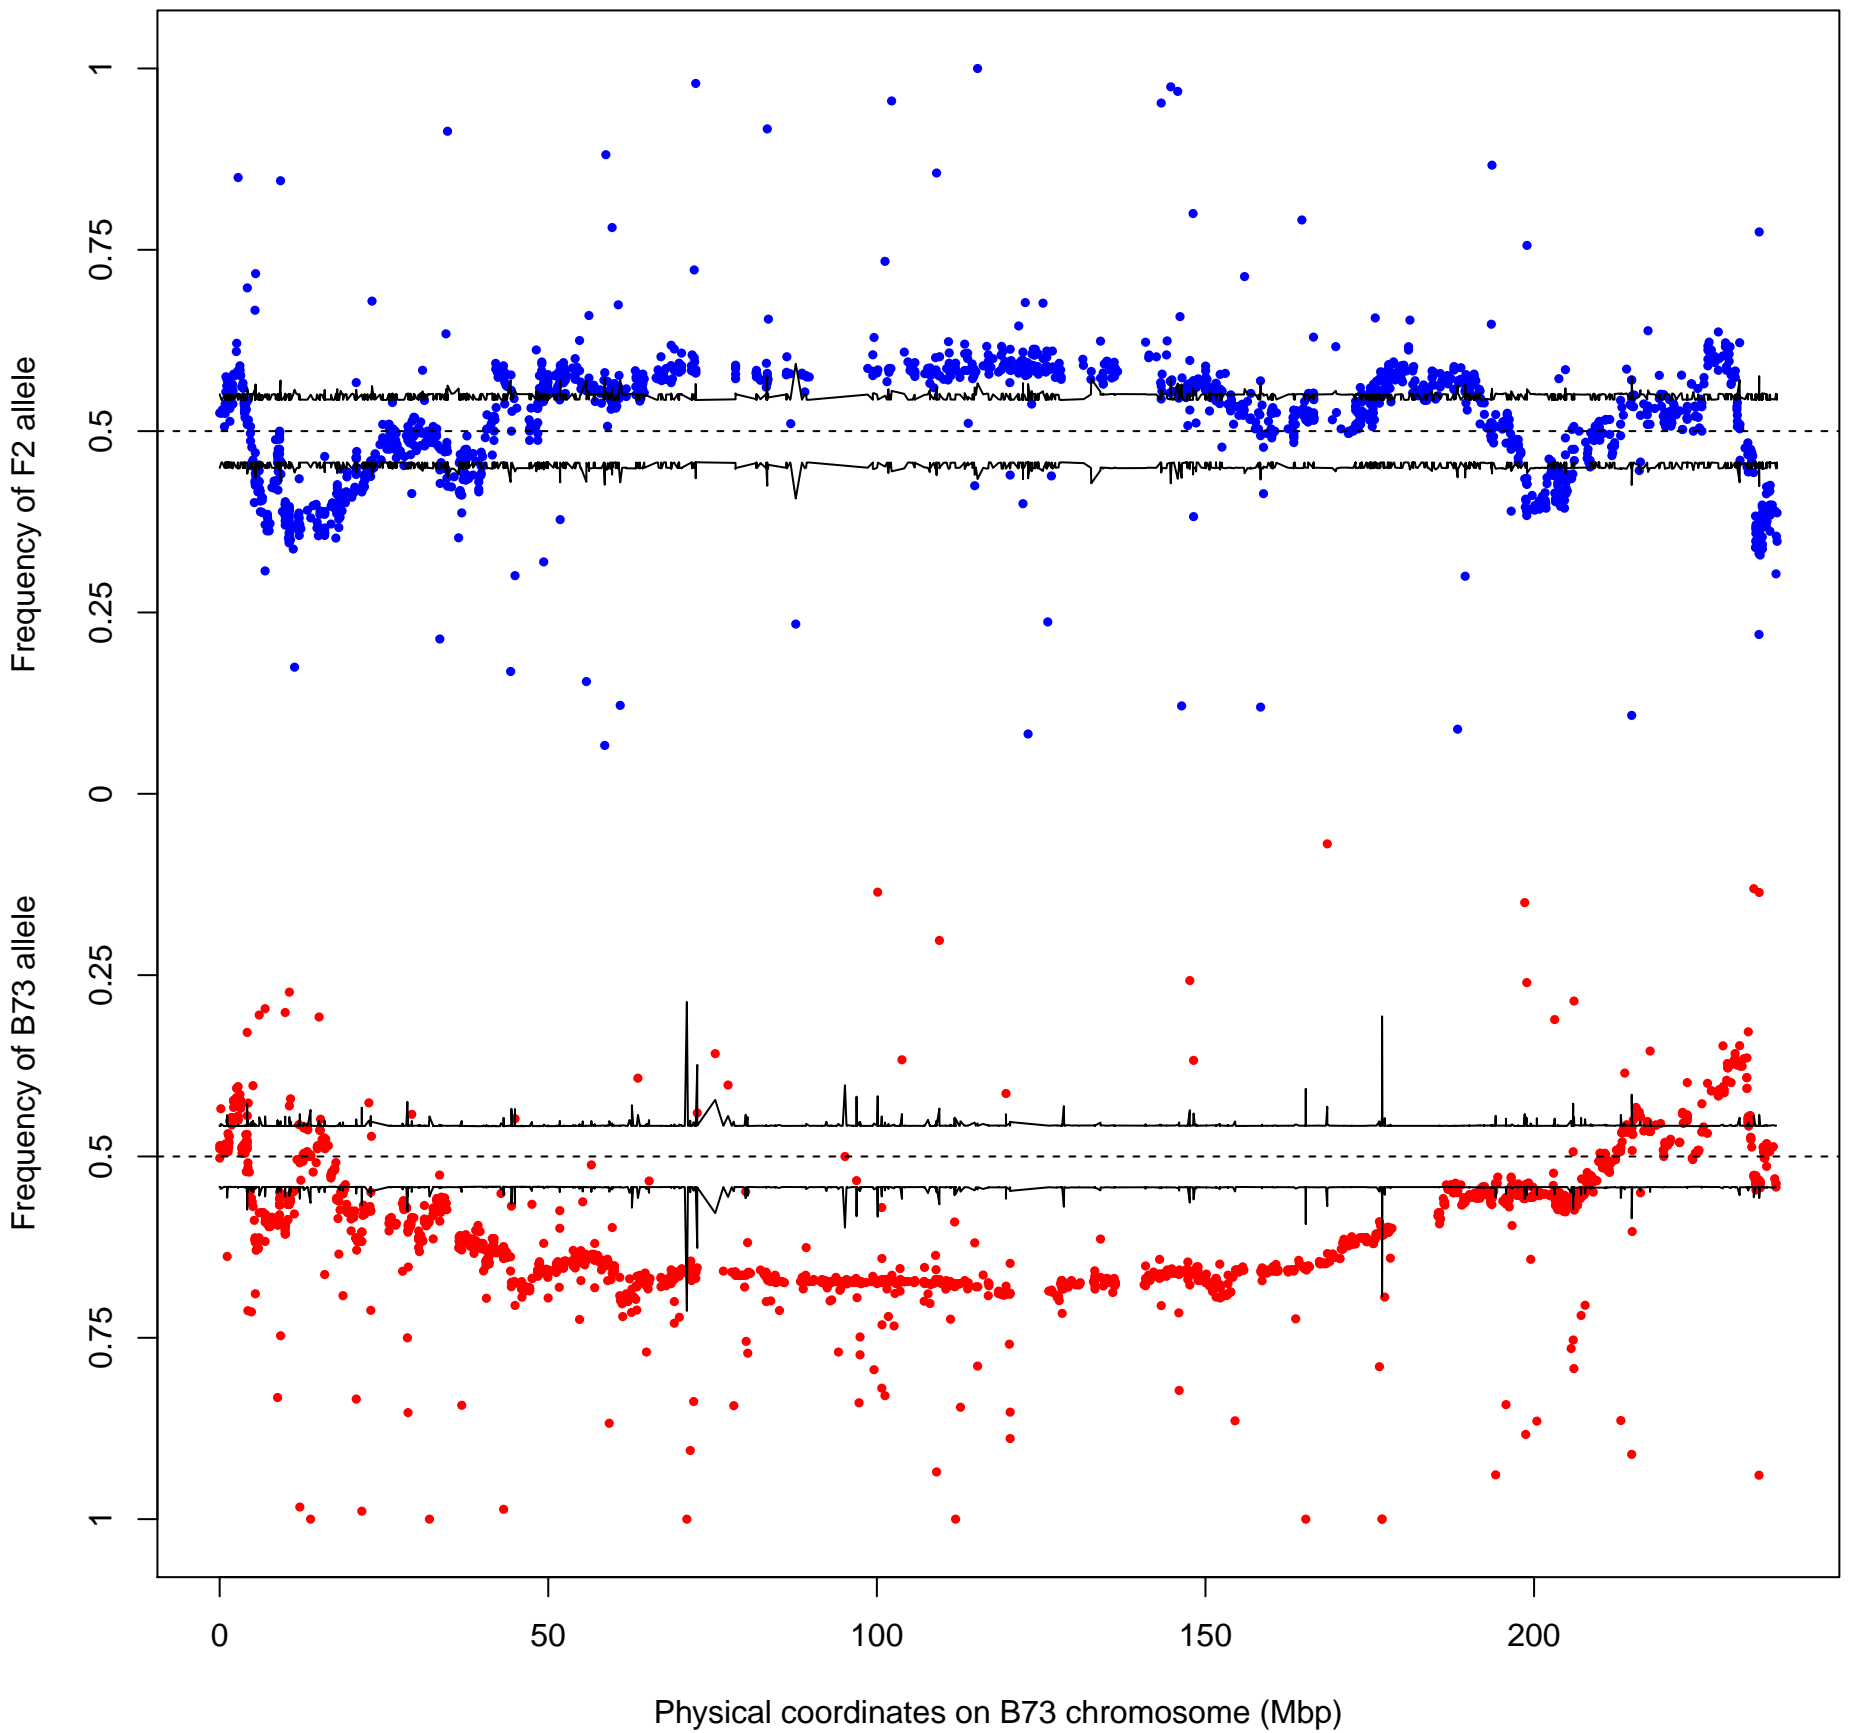

# Chromosome 3

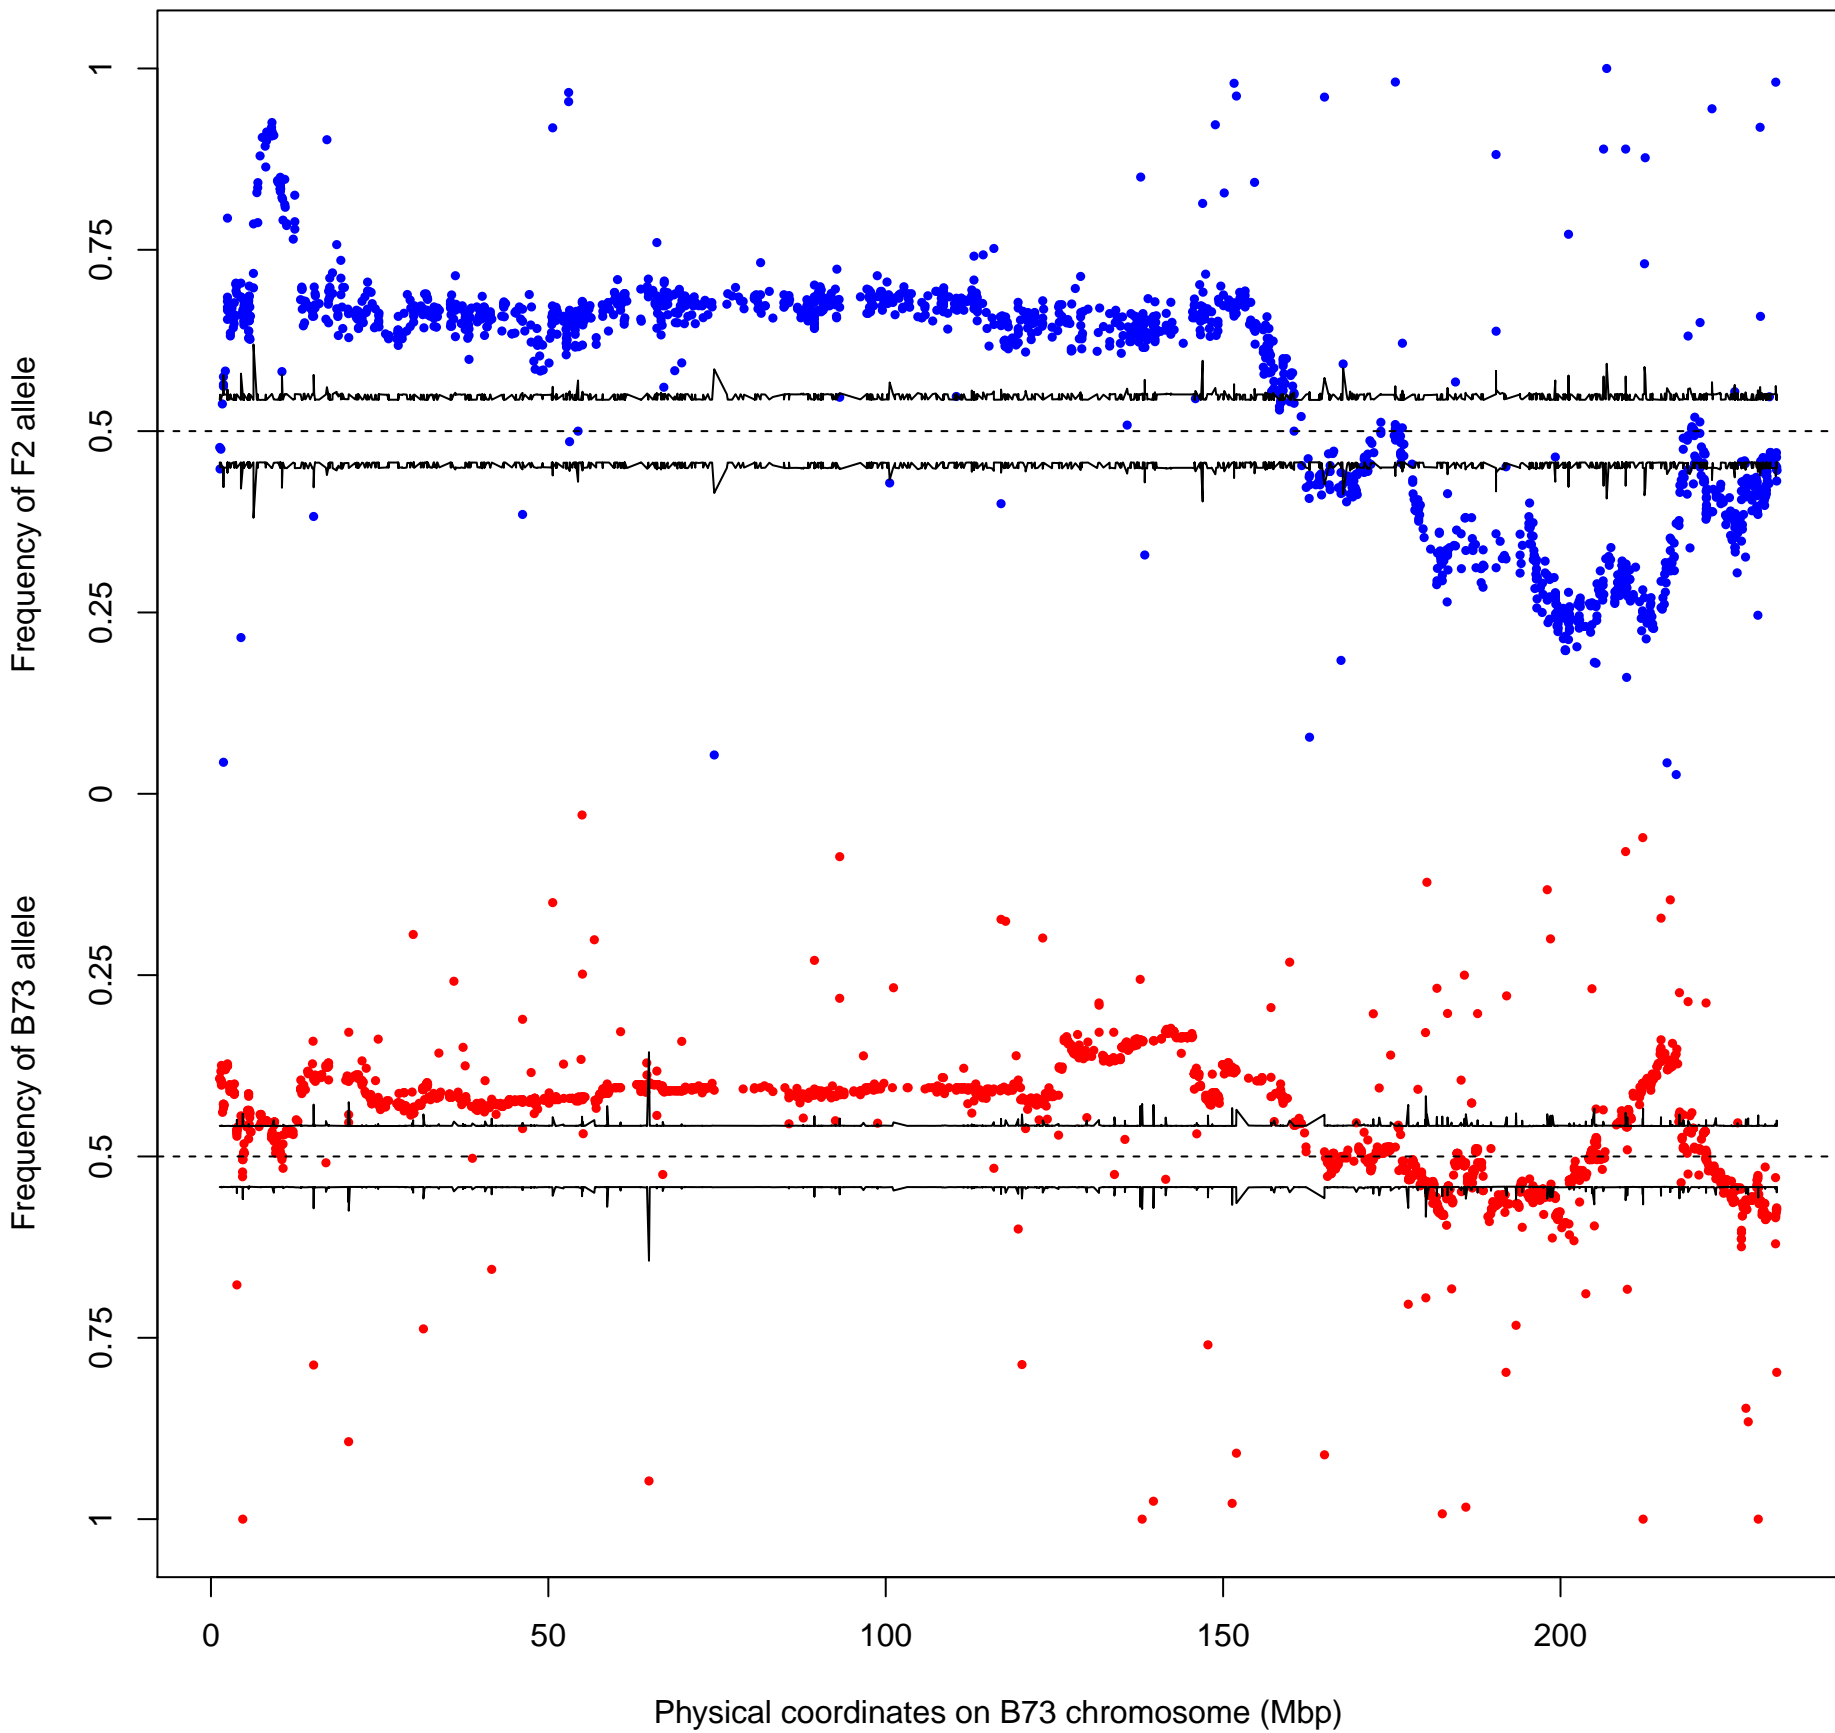

# Chromosome 4

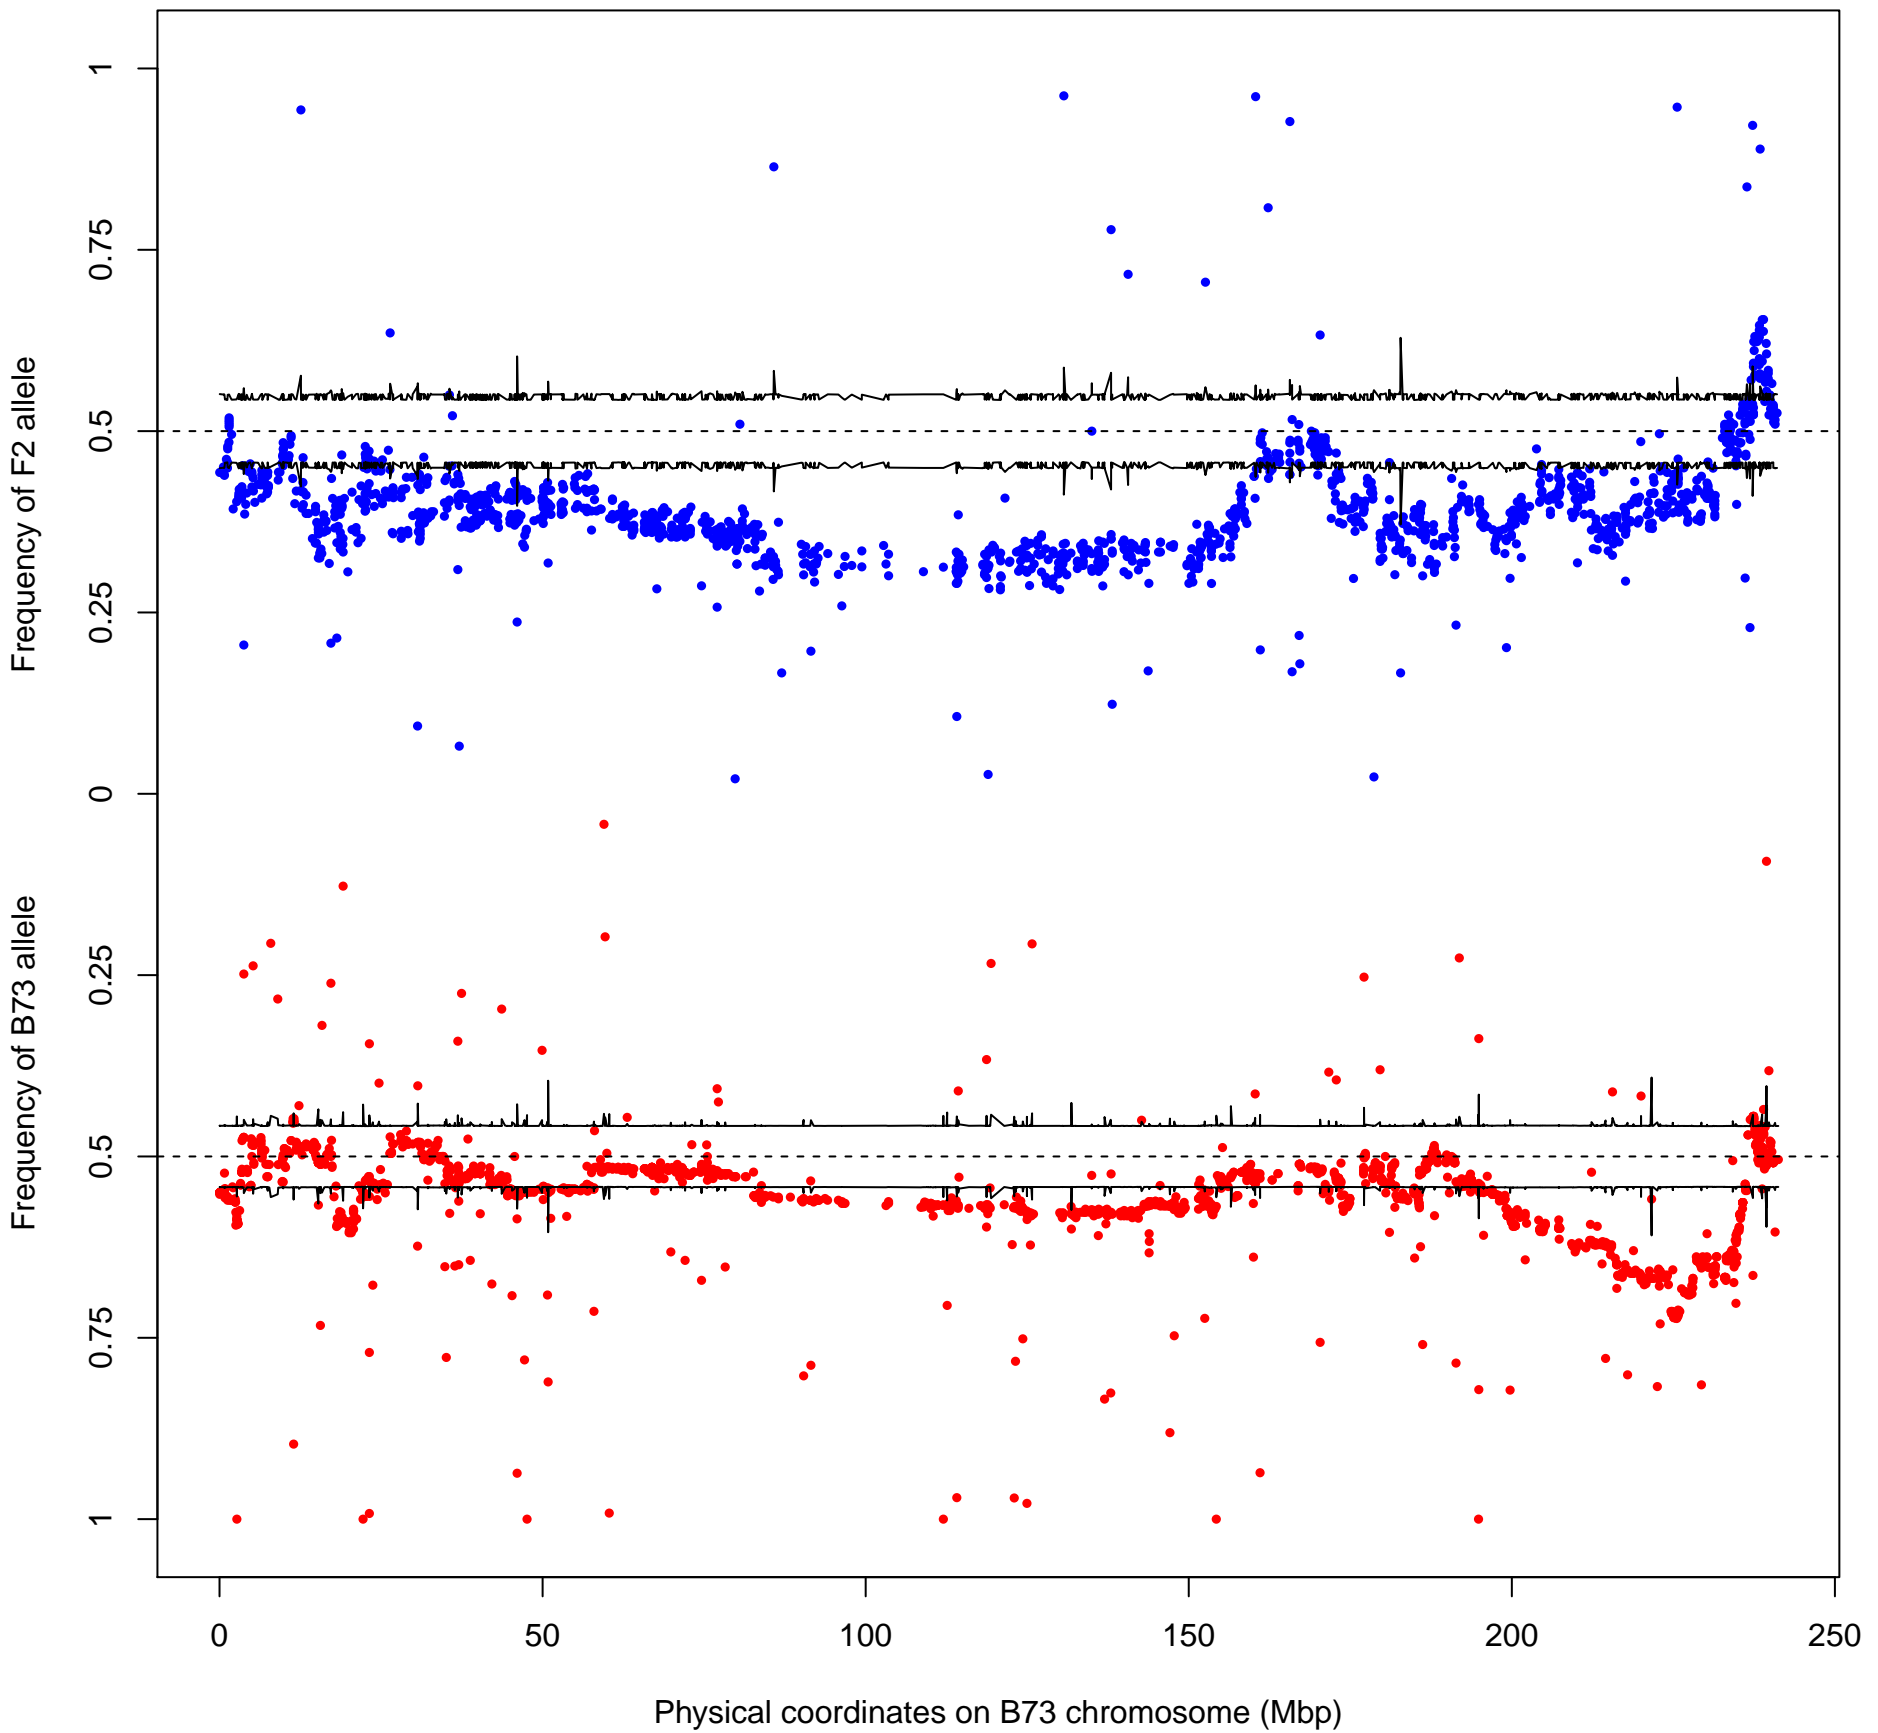

# Chromosome 5

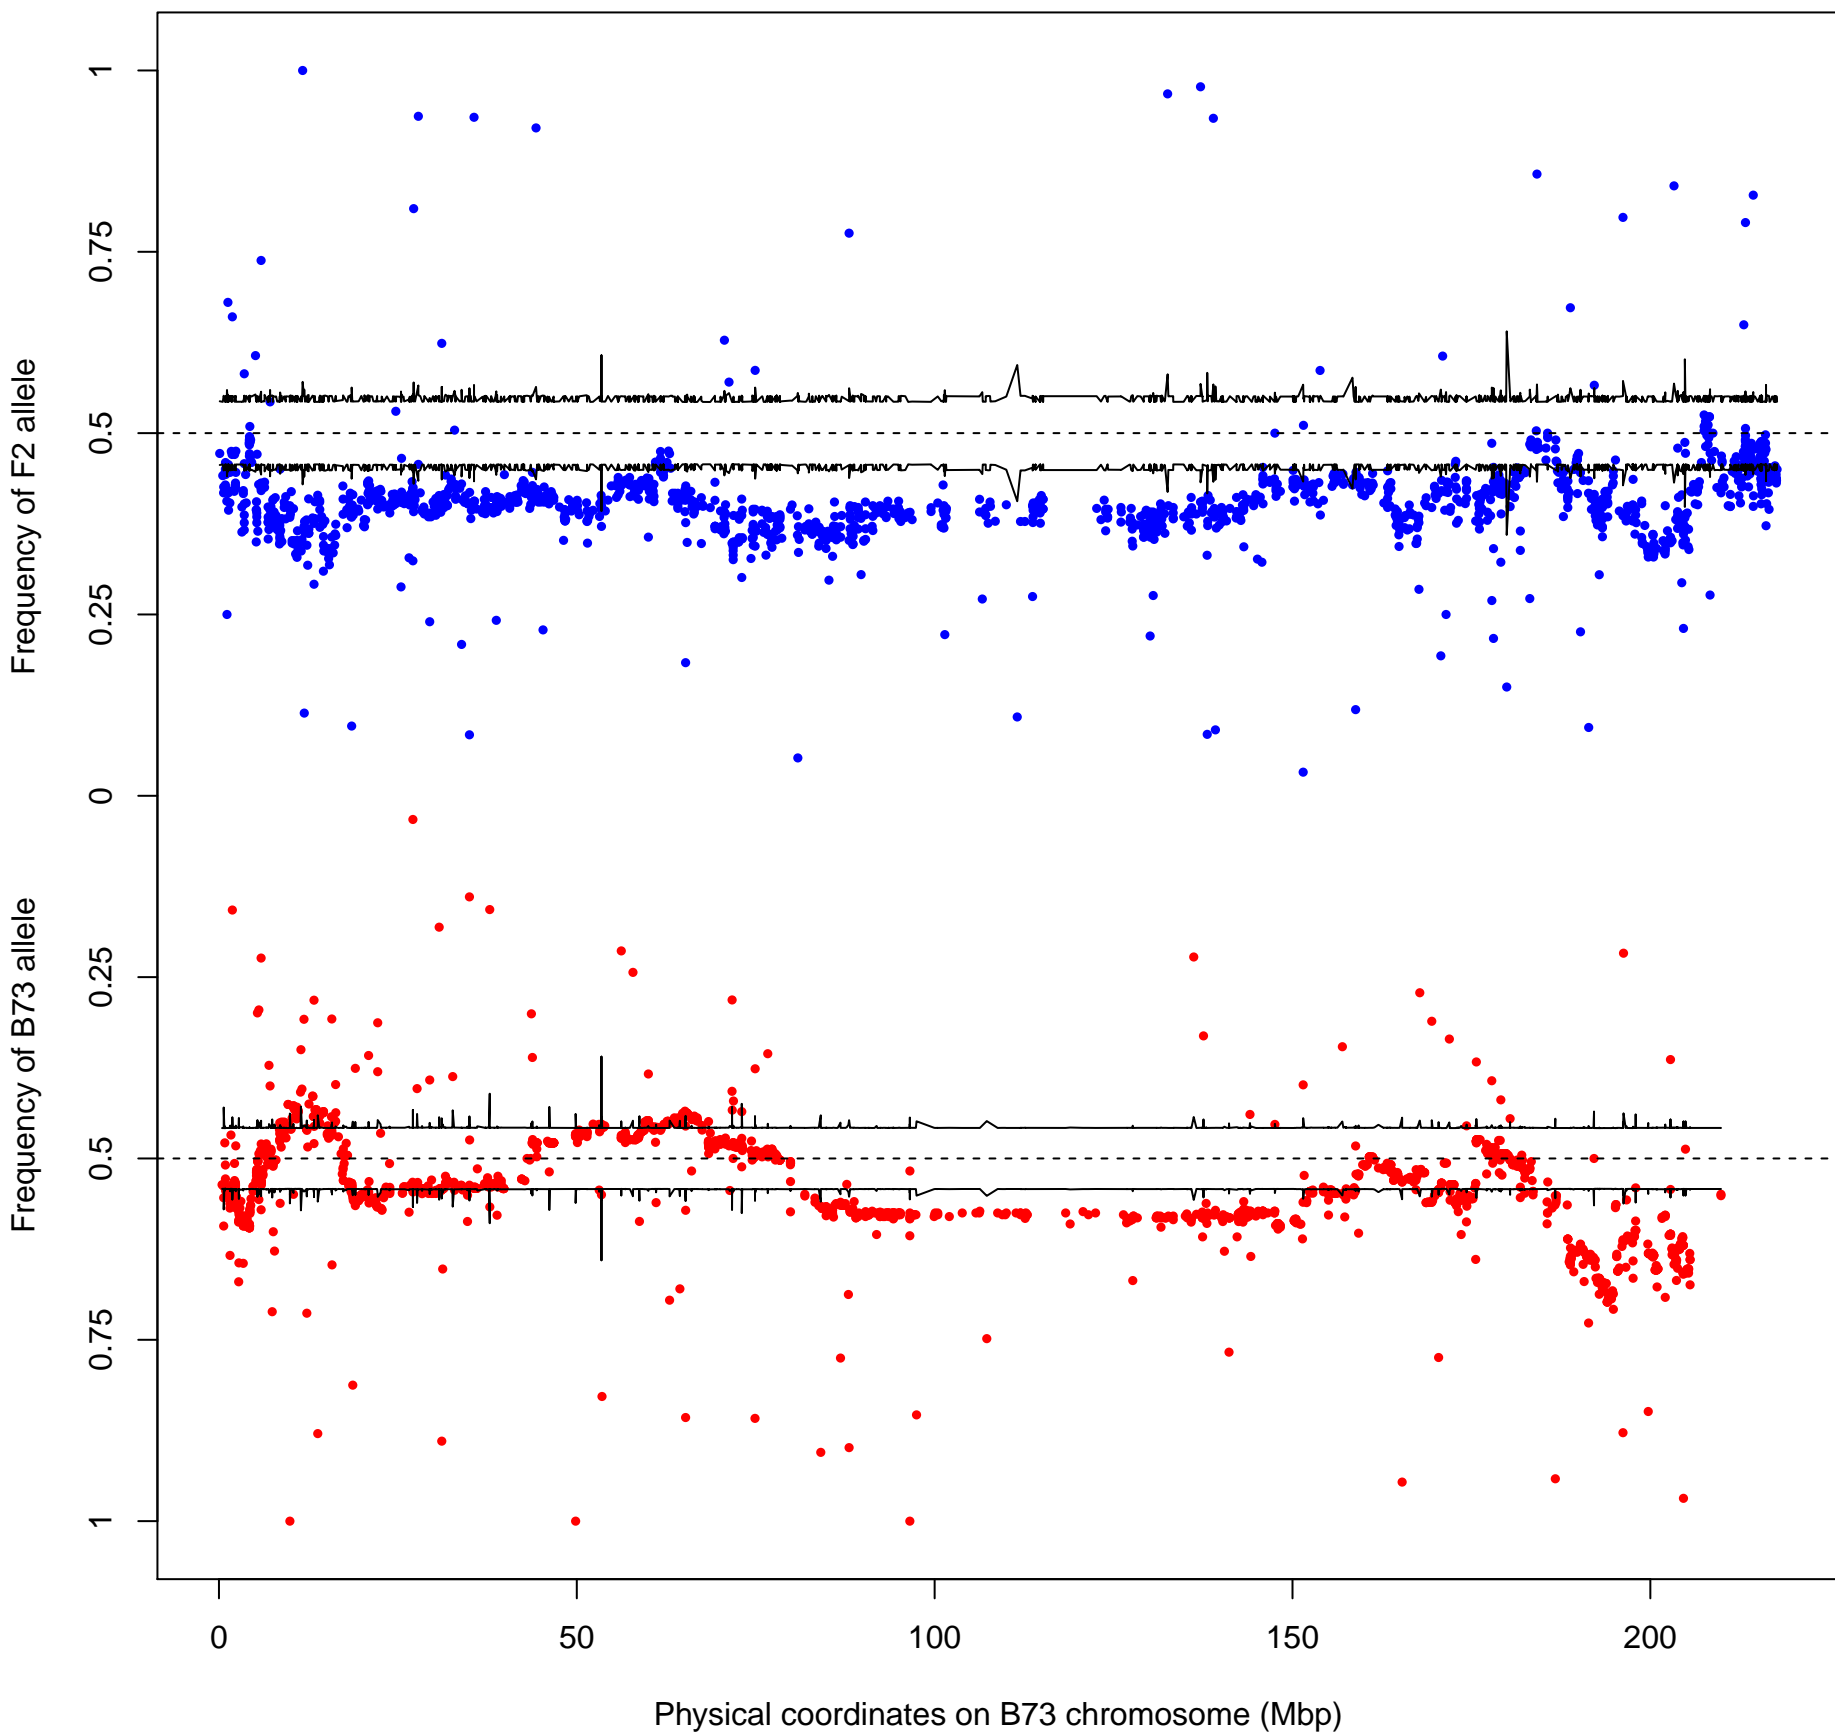

# Chromosome 6

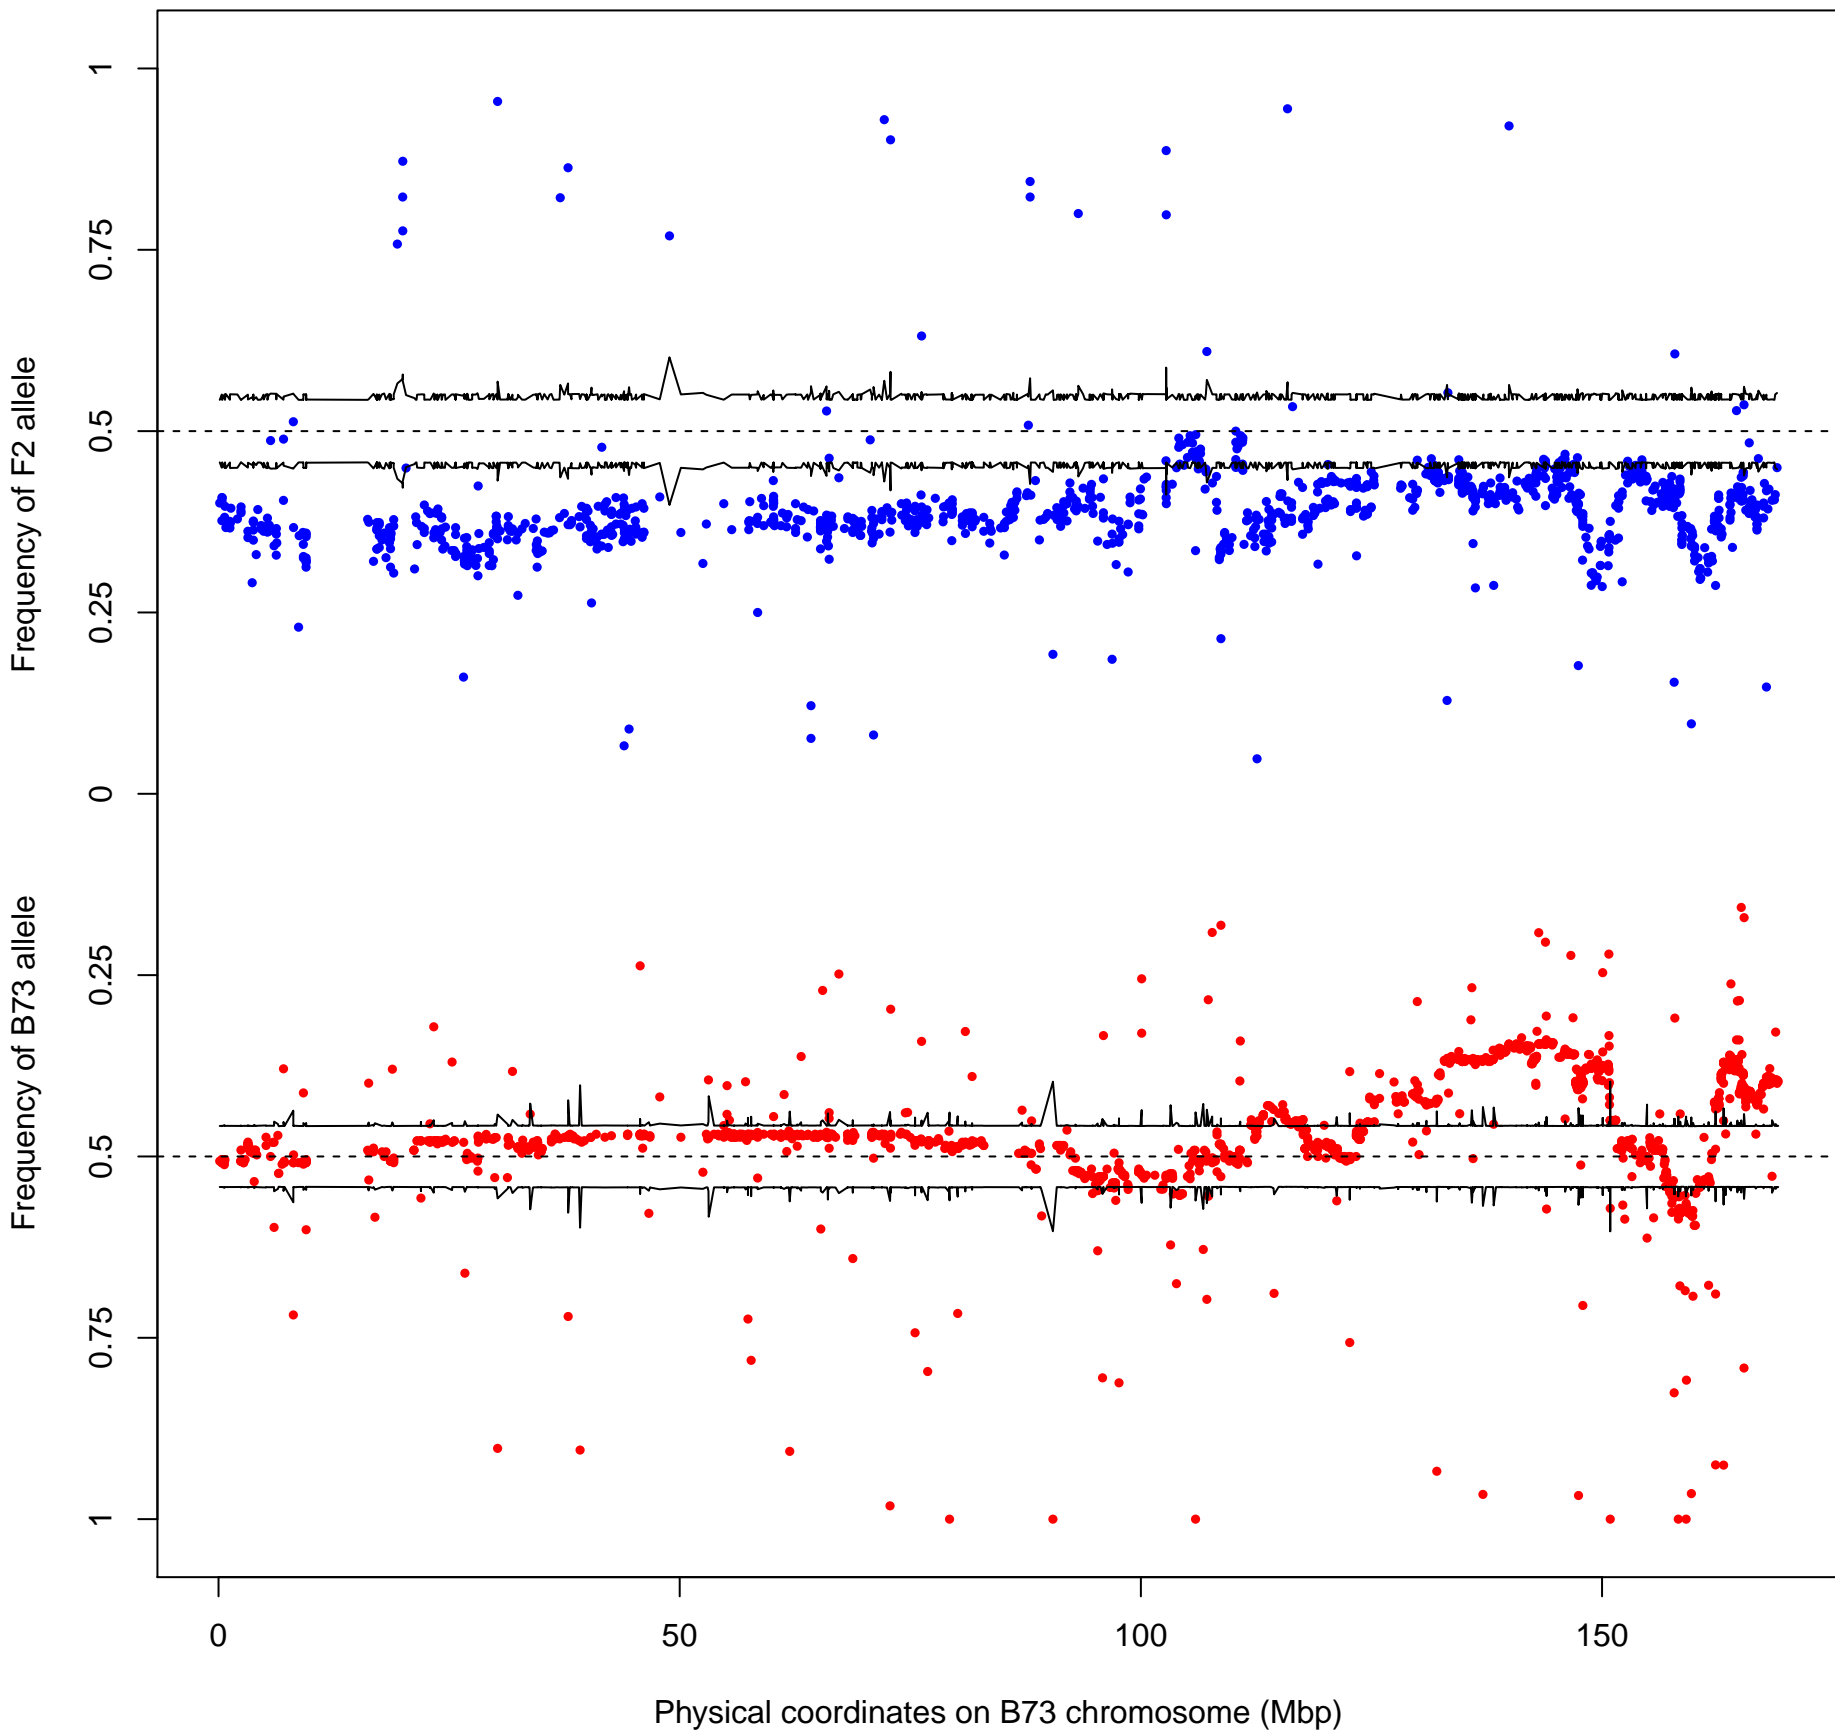

# Chromosome 7

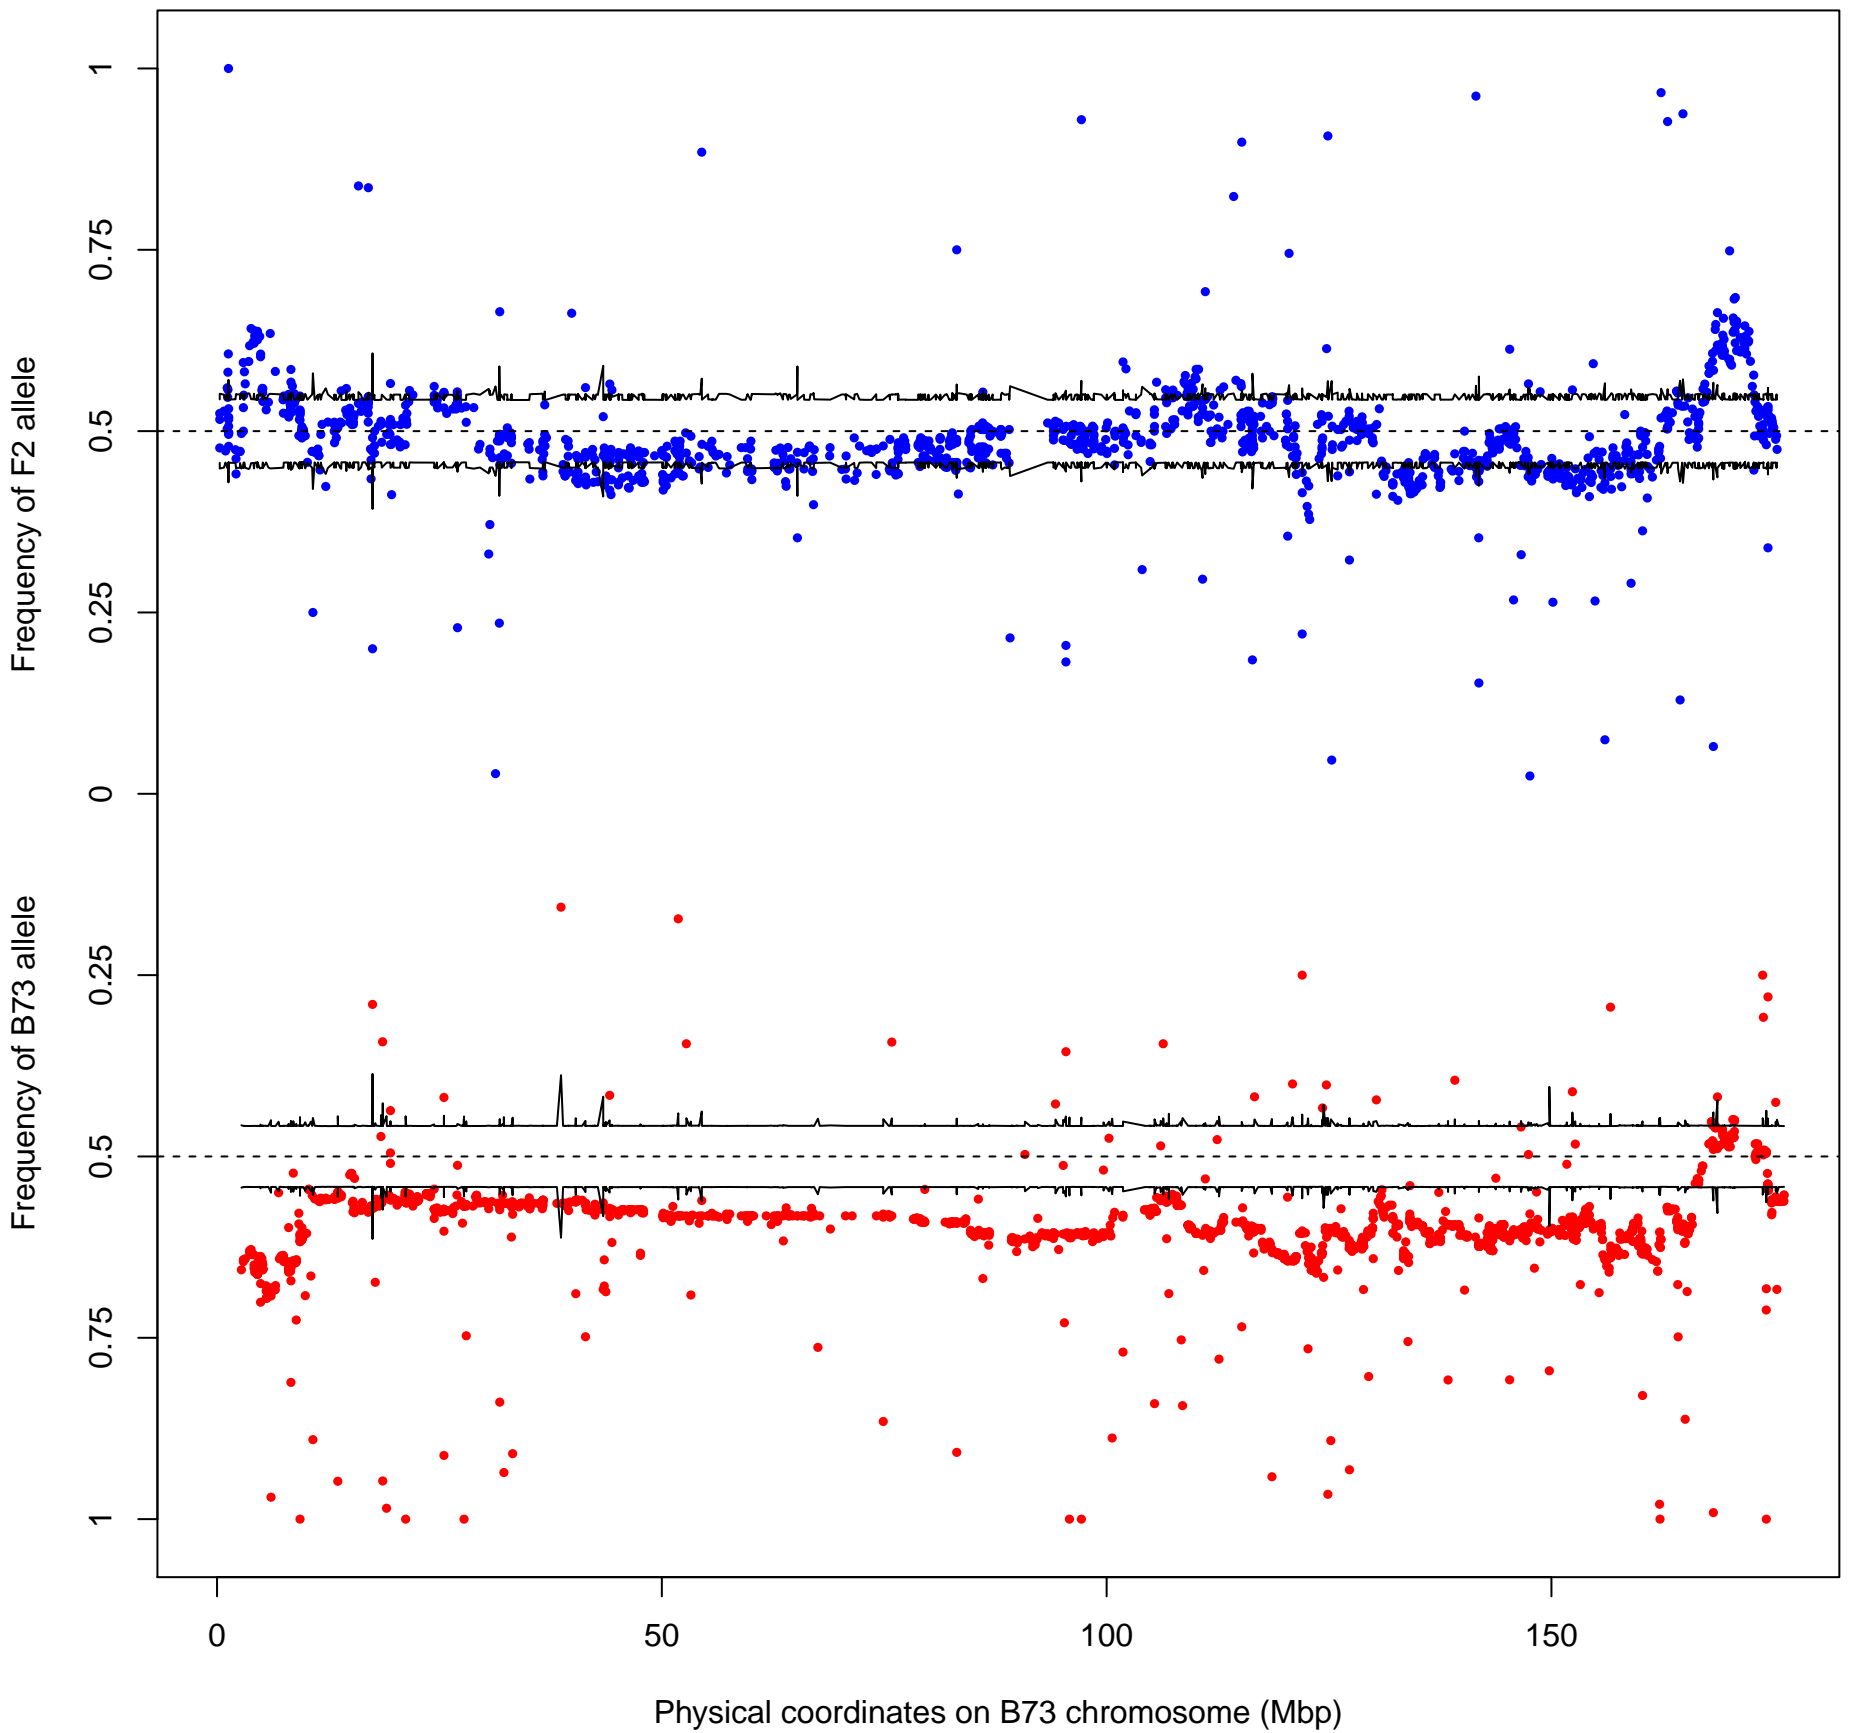

# Chromosome 8

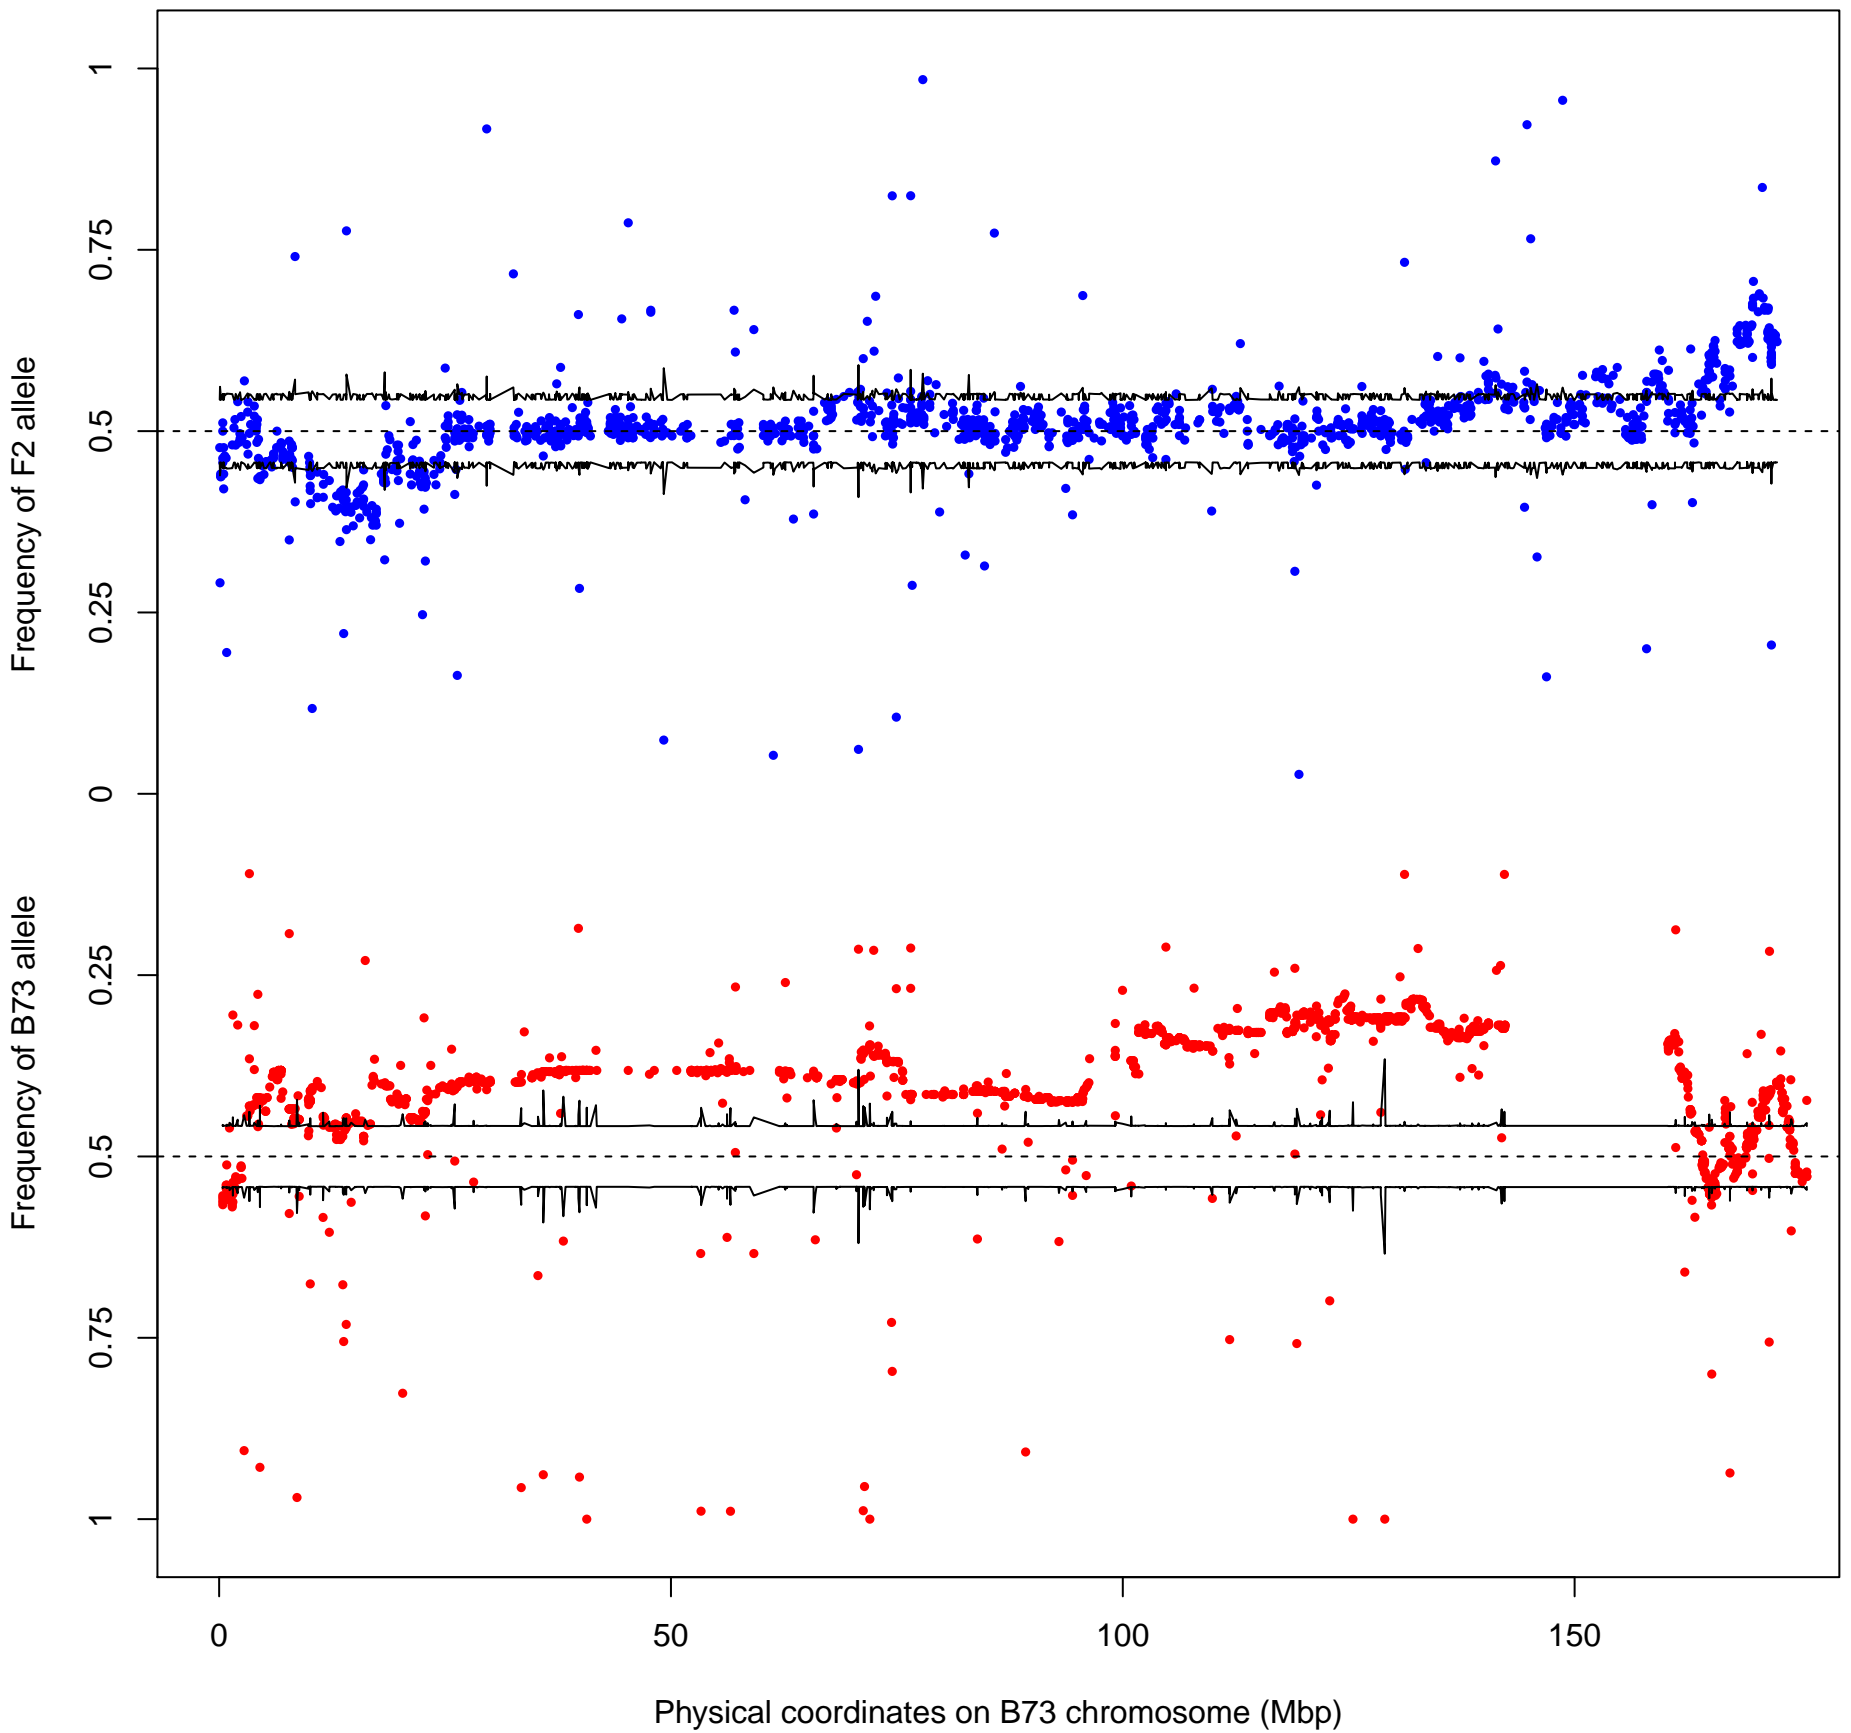



# Chromosome 9

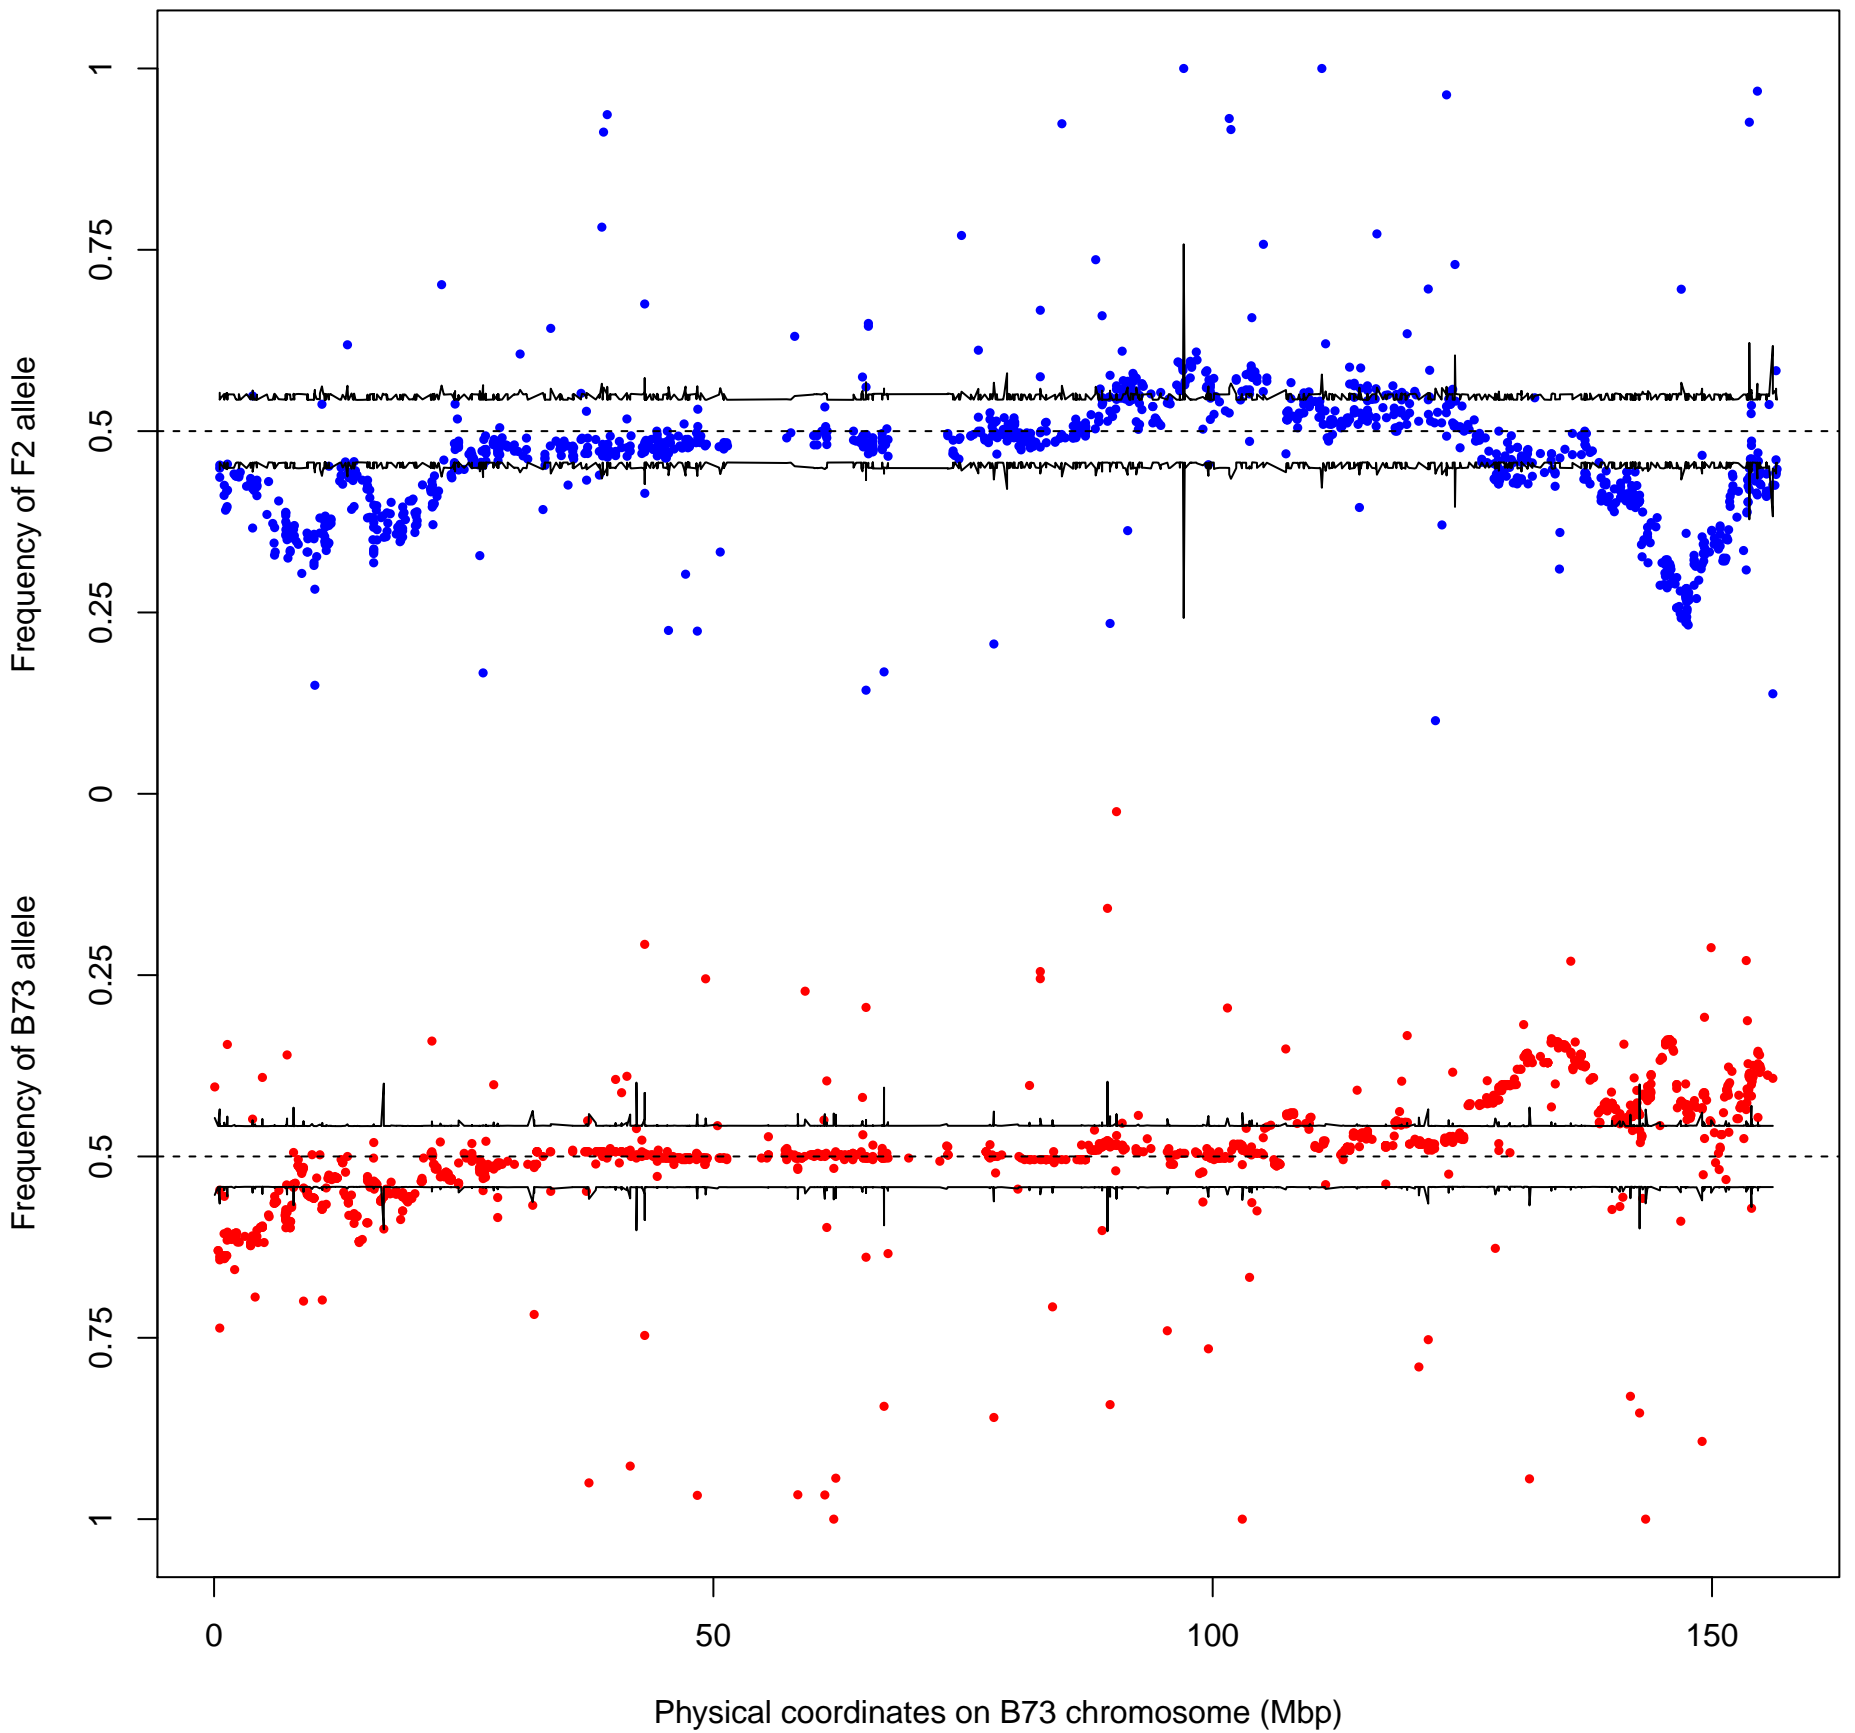

# Chromosome 10

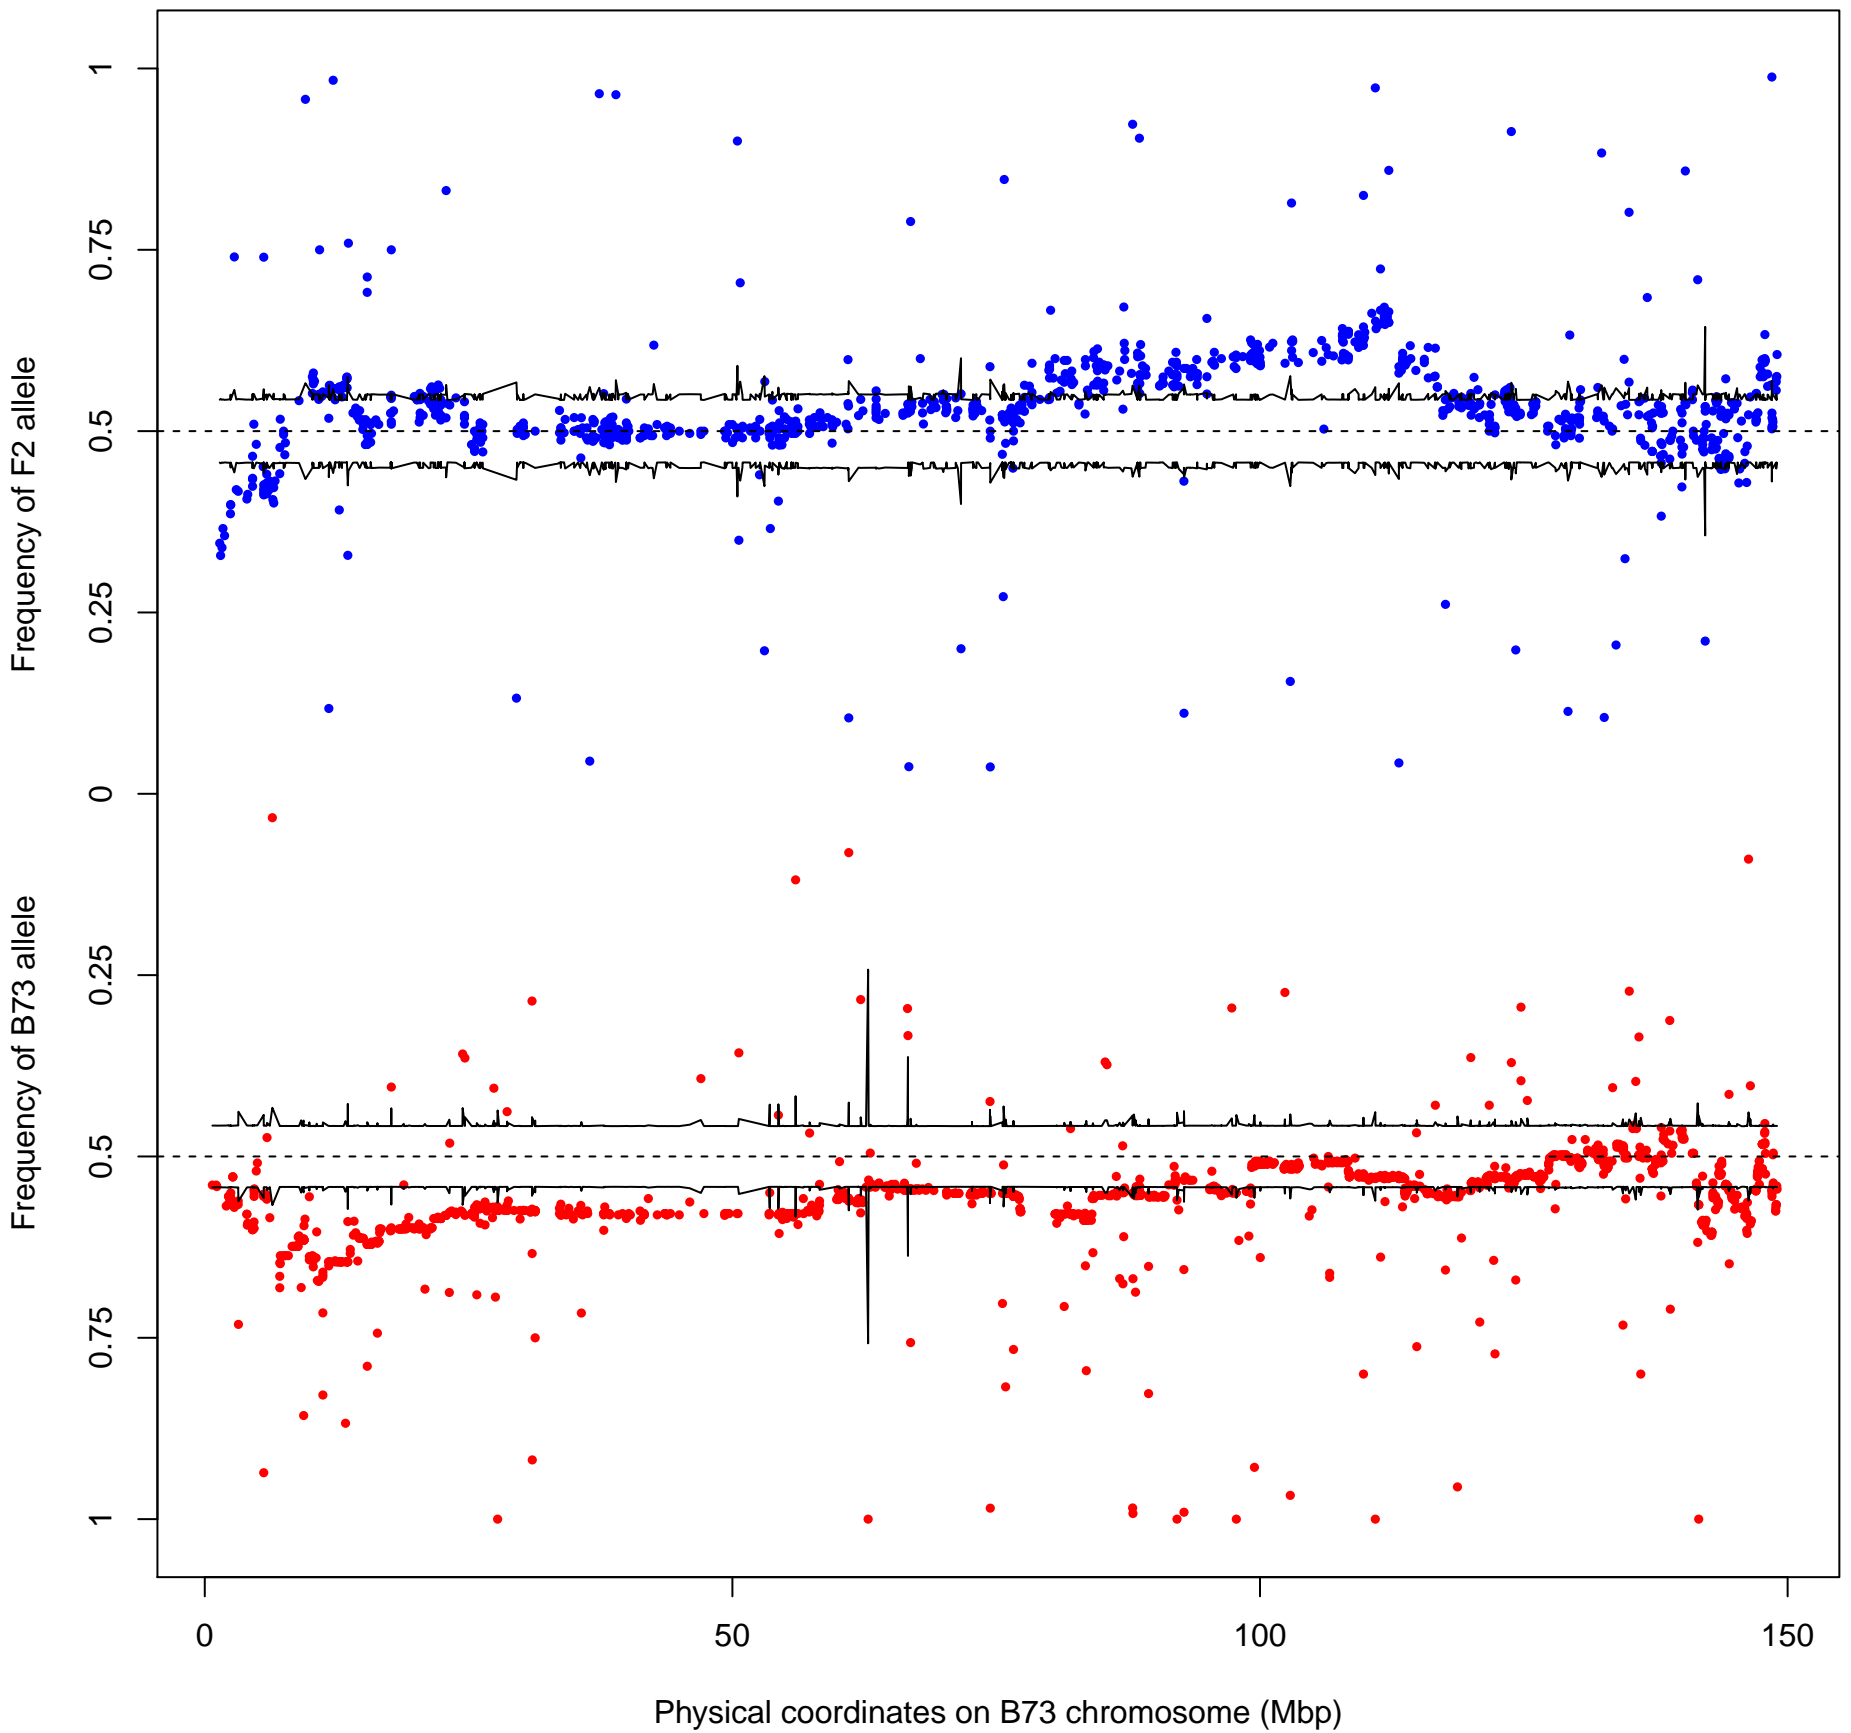

Supplement: pone.0028334.s002.pdf [file pone.0028334.s002.pdf]
