# Supplementary material for: A Large Maize (Zea mays L.) SNP Genotyping Array: Development and Germplasm Genotyping, and Genetic Mapping to Compare with the B73 Reference Genome
Source: PubMed Central journal article supplement (PMC3234264; doi:10.1371/journal.pone.0028334), 2011-12-08

**Chr. 1**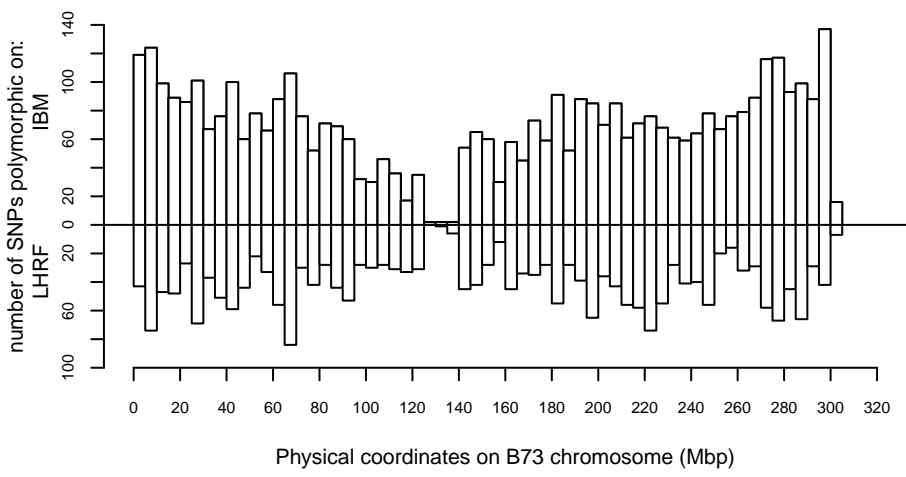**Chr. 2**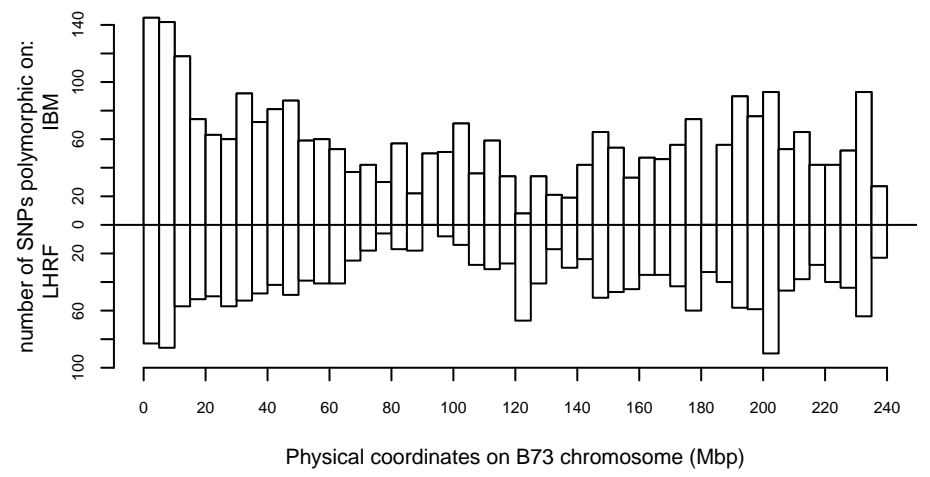**Chr. 3**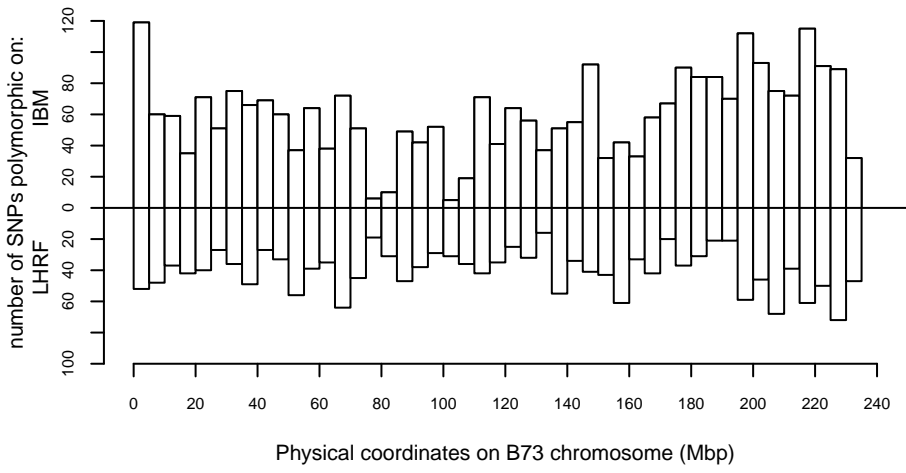**Chr. 4**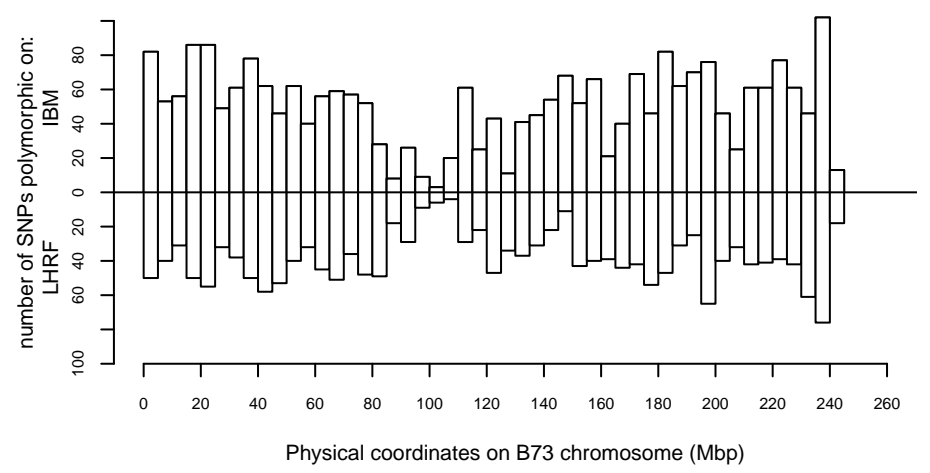**Chr. 5**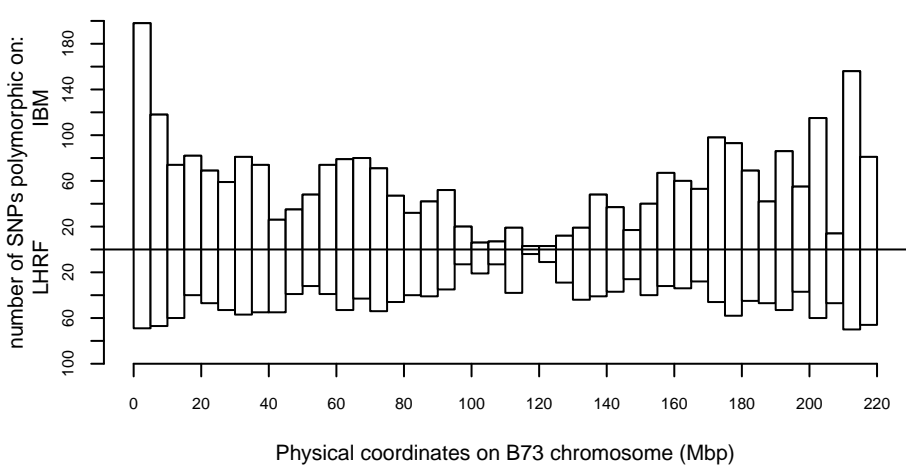**Chr. 6**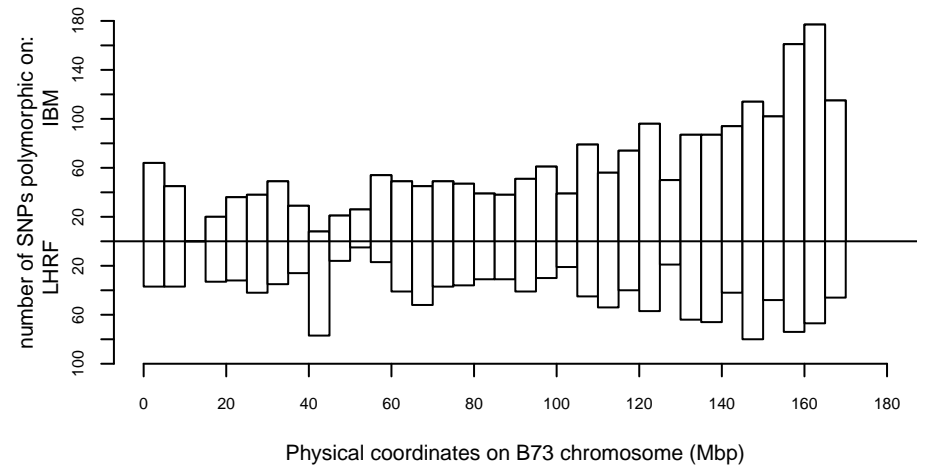**Chr. 7**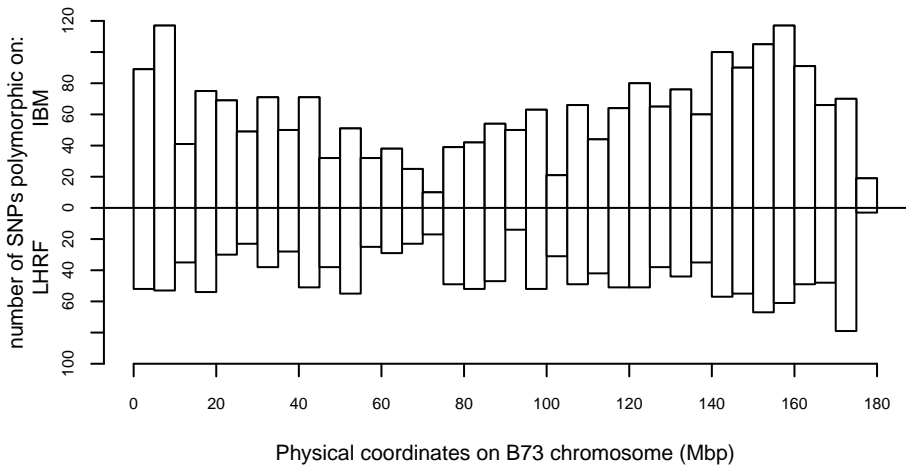**Chr. 8**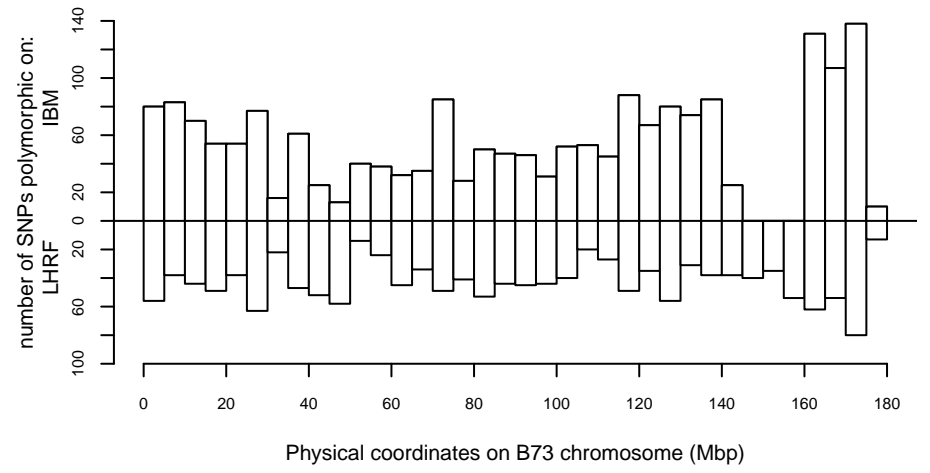**Chr. 9**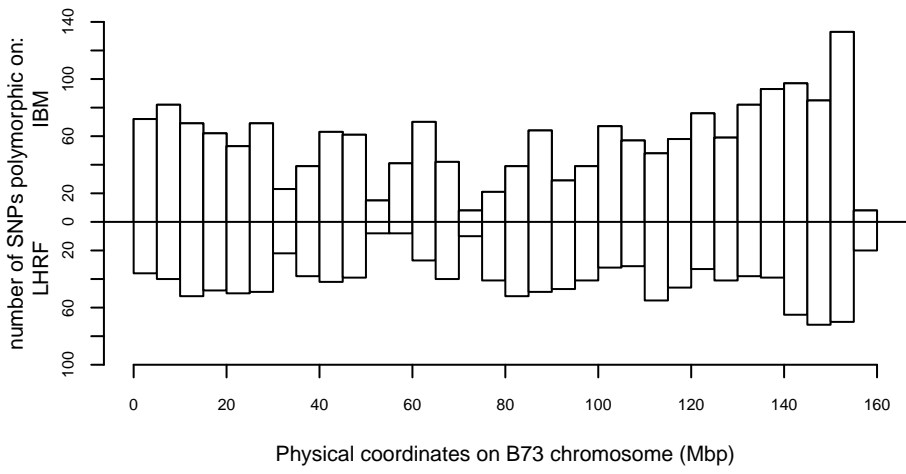**Chr. 10**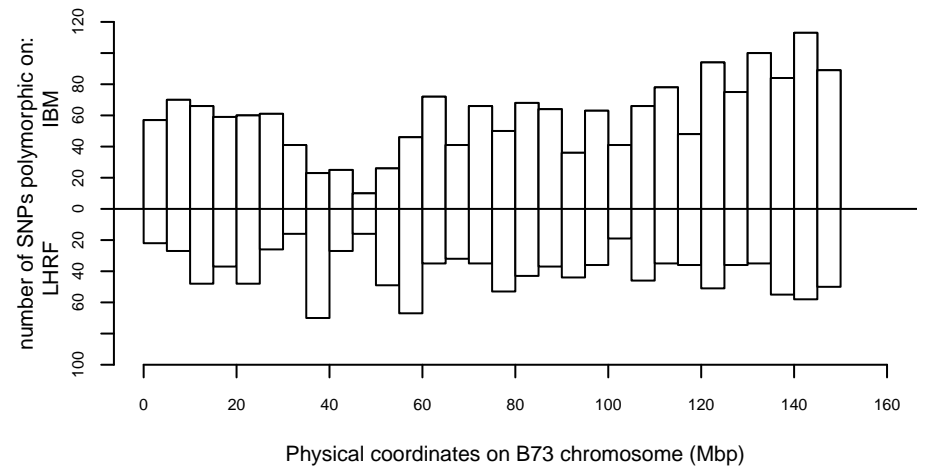

Supplement: pone.0028334.s003.pdf [file pone.0028334.s003.pdf]
