# Supplementary material for: A Large Maize (Zea mays L.) SNP Genotyping Array: Development and Germplasm Genotyping, and Genetic Mapping to Compare with the B73 Reference Genome
Source: PLoS One. 2011 Dec 8;6(12):e28334. doi: 10.1371/journal.pone.0028334 (PMC3234264; doi:10.1371/journal.pone.0028334)
Supplement: Table S1 — Duplicate reproducibility and parent/hybrid heritability. Top part shows duplicate reproducibility for DNA and sample duplicates. Bottom part shows correctness of analyzed triplets (2 parents and F1). (XLS) [file pone.0028334.s007.xls]

## Sheet: Quality data
Supplementary Table S1: Duplicate reproducibility and parent/hybrid heritability
Duplicate Reproducibility
based on all SNPs that could be scored in both samples with cluster file MaizeSNP50_B.egt
Rep1_DNA_Name	Rep2_DNA_Name	# Correct_SNPs	# Errors_SNPs	Total_B	Repro_Freq_B	Comment
B73-2	B73-1	49509	0	49509	1	DNA duplicate
B73-3	B73-1	49453	0	49453	1	DNA duplicate
B73xMo17-2	B73xMo17-1	48716	0	48716	1	DNA duplicate
B73xMo17-3	B73xMo17-1	48583	0	48583	1	DNA duplicate
Mo17-2	Mo17-1	48680	0	48680	1	DNA duplicate
Mo17-3	Mo17-1	48624	0	48624	1	DNA duplicate
Ki14-2	Ki14-1	47665	1	47666	0.999989	DNA duplicate
B97-2	B97-1	47969	0	47969	1	DNA duplicate
CML254-2	CML254-1	47285	0	47285	1	DNA duplicate
B73	B73_cf	49009	285	49294	0.997105	Same sample from different origins
OH43-2	OH43_cf	47714	367	48081	0.996176	Same sample from different origins
MO17	MO17_cf	47692	527	48219	0.99452	Same sample from different origins
F252=FV252	FV252_cf	45661	216	45877	0.997643	Same sample from different origins
MBS847	MBS847_cf	47967	6	47973	0.999938	Same sample from different origins
					0.998955
P-P-H Heritability
based on all SNPs that could be scored in all three samples
Hybrid_DNA_Name	Parent1_DNA_Name	Parent2_DNA_Name	# Correct_B	# Errors_B	Total_B	P-P-C Heritability Freq_B
B73xMo17-2	B73-1	Mo17-1	48662	0	48662	1
B73xMo17-3	B73-1	Mo17-1	48522	0	48522	1
B73xMo17-1	B73-1	Mo17-1	48649	0	48649	1
B73xB97	B73-1	B97-1	48109	0	48109	1
B73xCML52	B73-1	CML52	47731	0	47731	1
B73xCML69	B73-1	CMlL69	47832	1	47833	1
B73xCML103	B73-1	CML103	47777	2	47779	1
B73xCML247	B73-1	CML247	47765	7	47772	0.9999
B73xCML277	B73-1	CML277	47684	5	47689	0.9999
B73xCML322	B73-1	CML322	47686	0	47686	1
B73xCML333	B73-1	CML333	47843	0	47843	1
B73xHp301	B73-1	Hp301	47688	0	47688	1
B73xIl14H	B73-1	Il14H	47724	0	47724	1
B73xKi3	B73-1	Ki3	47838	0	47838	1
B73xKi11	B73-1	Ki11	47765	0	47765	1
B73xKy21	B73-1	Ky21	48027	0	48027	1
B73xMo18W	B73-1	MO18W	47855	1	47856	1
B73xMS71	B73-1	MS71	48047	0	48047	1
B73xM37W	B73-1	M37W	47860	0	47860	1
B73xNC350	B73-1	NC350	47844	0	47844	1
B73xNC358	B73-1	NC358	47826	0	47826	1
B73xOh43	B73-1	Oh43-1	48012	0	48012	1
B73xOh7B	B73-1	Oh7B	48176	0	48176	1
B73xP39	B73-1	P39	47696	0	47696	1
B73xTx303	B73-1	Tx303	47882	0	47882	1
B73xTzi8	B73-1	Tzi8	47087	355	47442	0.9925
B73xW22 R-r:standard(Brink)	B73-1	W22 R-scm std	48001	0	48001	1
B73xCML254	B73-1	CML254-1	47349	2	47351	1
CML228xB73	CML228	B73-1	47892	1	47893	1
B97xCML254	B97-2	CML254-1	45762	7	45769	0.9998
K-T1	Mu-T1	Va-T1	46340	0	46340	1
K-T2	Mu-T2	Va-T2	46408	26	46434	0.9994
K-T4	Mu-T4	Va-T4	45995	253	46248	0.9945
K-T5	Mu-T5	Va-T5	46278	19	46297	0.9996
K-T6	Mu-T6	Va-T6	46232	169	46401	0.9964
K-T8	Mu-T8	Va-T8	46575	0	46575	1
K-T9	Mu-T9	Va-T9	46354	84	46438	0.9982
K-T11	Mu-T11	Va-T11	46380	33	46413	0.9993
K-T12	Mu-T12	Va-T12	46674	2	46676	1
						0.999474
