# Supplementary material for: A Large Maize (Zea mays L.) SNP Genotyping Array: Development and Germplasm Genotyping, and Genetic Mapping to Compare with the B73 Reference Genome
Source: PLoS One. 2011 Dec 8;6(12):e28334. doi: 10.1371/journal.pone.0028334 (PMC3234264; doi:10.1371/journal.pone.0028334)
Supplement: Table S9 — Position of mapped SNP markers not located on B73 genome sequence. The genetic mapping results are displayed for the 172 markers that were not found on the B73 genome sequence. Table columns are as in Table S8. (XLS) [file pone.0028334.s015.xls]

## Sheet: Markers not on B73 sequence
Supplementary Table S9: genetic mapping of markers without B73 genome coordinate
SNP name	IBM status	LHRF status	IBM chrom	LHRF chrom	IBM coordinate (cM)	LHRF coordinate (cM)	IBM coordinate (pseudo-cM)	LHRF coordinate (pseudo-cM)
PHM14519.8	placed	-	1	-	119.2	-	249.8	-
PHM16788.6	-	frame	-	5	-	106.2	-	221.9
PHM3630.8	-	placed	-	5	-	227.2	-	471.7
PHM662.27	-	placed	-	5	-	1.2	-	2.4
PUT-163a-101389210-16	-	placed	-	5	-	173	-	360.3
PUT-163a-101392844-22	placed	-	3	-	76	-	159.2	-
PUT-163a-110528154-112	frame	-	10	-	58.7	-	121.8	-
PUT-163a-13515860-232	-	frame	-	5	-	93.1	-	194.7
PUT-163a-13515860-234	-	placed	-	5	-	93.1	-	194.7
PUT-163a-148942702-461	-	placed	-	5	-	77.7	-	162.7
PUT-163a-148942702-462	-	placed	-	5	-	77.7	-	162.7
PUT-163a-148942702-464	-	placed	-	5	-	77.7	-	162.7
PUT-163a-148943685-476	placed	-	1	-	160	-	335.6	-
PUT-163a-149112808-975	placed	-	3	-	148.1	-	310.1	-
PUT-163a-18163661-1261	-	frame	-	6	-	72.2	-	149.8
PUT-163a-18172808-1387	-	frame	-	5	-	137.6	-	287.4
PUT-163a-18180613-1496	-	placed	-	7	-	67.6	-	140.7
PUT-163a-28910843-1642	placed	placed	5	5	95.5	134.4	199.8	280.7
PUT-163a-30032193-1854	placed	-	8	-	78.1	-	161.9	-
PUT-163a-4730575-2150	placed	-	6	-	31.2	-	65.3	-
PUT-163a-4730575-2151	-	frame	-	6	-	56.5	-	117.9
PUT-163a-4730575-2153	-	placed	-	6	-	56.5	-	117.9
PUT-163a-60341044-2410	placed	frame	9	9	70.1	78.5	144.7	161.9
PUT-163a-60352761-2693	placed	-	8	-	35.4	-	73.9	-
PUT-163a-60356868-2816	placed	-	1	-	144.9	-	303.7	-
PUT-163a-60396905-2949	frame	-	6	-	43.2	-	90.6	-
PUT-163a-60396905-2950	placed	-	6	-	43.2	-	90.6	-
PUT-163a-60397057-2952	-	frame	-	4	-	80.7	-	167.1
PUT-163a-71318546-3146	frame	frame	8	8	68.1	91.3	140.8	190.8
PUT-163a-71764991-3494	placed	placed	10	10	49.9	54.3	103.1	112.8
PUT-163a-71765182-3496	-	placed	-	8	-	124.3	-	258.8
PUT-163a-71766778-3515	placed	-	7	-	123	-	258.3	-
PUT-163a-74241344-3659	placed	-	3	-	61.1	-	127.3	-
PUT-163a-78109387-4288	placed	-	3	-	111.5	-	233.8	-
PUT-163a-78122693-4409	-	placed	-	5	-	170.2	-	354.7
PUT-163a-89757491-4674	-	frame	-	7	-	57	-	118.8
PUT-163a-89763353-4712	-	placed	-	4	-	82	-	170
PUT-163a-93013486-4809	placed	-	2	-	186.9	-	387	-
PZA00086.8	frame	-	4	-	179.1	-	373.7	-
PZA00153.3	placed	-	7	-	35.9	-	74.4	-
PZA00153.7	placed	-	7	-	35.9	-	74.4	-
PZA00270.1	-	frame	-	5	-	117.2	-	245.6
PZA00270.4	frame	-	5	-	80.4	-	167.8	-
PZA00311.4	placed	frame	4	4	75.2	73.2	156.9	151.5
PZA00560.2	-	frame	-	1	-	219.5	-	451.9
PZA00726.8	placed	-	4	-	73.7	-	154.1	-
PZA00755.2	placed	-	2	-	112.8	-	233.8	-
PZA01034.1	placed	-	2	-	97.5	-	202.4	-
PZA01039.1	placed	-	1	-	155	-	325	-
PZA01726.1	frame	placed	3	3	108.6	112.5	227.7	231.9
PZA01983.1	placed	-	5	-	0.1	-	0.3	-
PZA02167.2	-	placed	-	10	-	112.8	-	234
PZA02296.1	placed	placed	3	3	76	70.2	159.2	145.6
PZA02474.1	placed	-	3	-	84.3	-	176.9	-
PZA02906.12	-	placed	-	3	-	82.1	-	170
PZA02906.7	-	placed	-	3	-	82.1	-	170
PZA02948.21	-	placed	-	6	-	26	-	54.2
PZA02977.4	placed	-	2	-	97.5	-	202.4	-
PZA03100.4	placed	-	1	-	79.1	-	164.8	-
PZA03380.1	-	frame	-	5	-	111.7	-	234
PZA03481.1	frame	frame	3	3	170.9	180.8	357.2	373
PZA03578.1	-	placed	-	5	-	77.7	-	162.7
PZB00081.4	placed	-	5	-	30.8	-	63.7	-
PZB00137.1	-	placed	-	3	-	73	-	151.5
PZB01487.2	-	frame	-	4	-	153.8	-	318.4
PZB01689.1	-	placed	-	5	-	139.1	-	290.5
PZB02510.5	placed	-	3	-	127.8	-	267.9	-
PZD00026.5	placed	frame	1	1	55.6	64.6	115.4	133.5
PZE0004602655	-	placed	-	9	-	102.1	-	210.9
PZE-100001195	placed	-	9	-	80.9	-	167.7	-
PZE-100001203	placed	-	9	-	80.9	-	167.7	-
PZE-100001354	-	placed	-	9	-	102.1	-	210.9
PZE-101046118	placed	-	1	-	62.7	-	130.3	-
PZE-101074076	frame	-	1	-	87.9	-	183.3	-
PZE-101074428	placed	placed	1	1	88.4	113.3	184.4	233.4
PZE-101130736	-	placed	-	1	-	159.9	-	329.6
PZE-101235343	-	placed	-	1	-	294.7	-	605.9
PZE-102049484	-	frame	-	2	-	90.5	-	189.9
PZE-102049489	-	placed	-	2	-	90.5	-	189.9
PZE-102049491	-	placed	-	2	-	90.5	-	189.9
PZE-102049498	-	placed	-	2	-	90.5	-	189.9
PZE-102112009	placed	-	2	-	99.8	-	207.4	-
PZE-102115604	placed	-	2	-	101.9	-	211.6	-
PZE-102184764	frame	frame	1	1	28.9	30	59.6	62
PZE-103057734	placed	-	3	-	76.2	-	159.6	-
PZE-103059266	-	placed	-	3	-	70	-	145.2
PZE-103086395	placed	placed	3	3	82.7	79.2	173.6	164.1
PZE-103109317	-	placed	-	3	-	106.1	-	218.9
PZE-104013979	placed	-	4	-	48.9	-	101.9	-
PZE-104041273	-	placed	-	4	-	71.2	-	147.5
PZE-104112742	placed	placed	4	4	127.3	150.7	265.4	312.2
PZE-104112743	placed	placed	4	4	127.3	150.7	265.4	312.2
PZE-105182648	-	placed	-	5	-	226.1	-	469.5
PZE-106027393	placed	-	6	-	16.1	-	33.8	-
PZE-106073612	-	placed	-	6	-	98.7	-	205.4
PZE-106073613	-	placed	-	6	-	98.7	-	205.4
PZE-107003750	-	frame	-	7	-	12	-	25.2
PZE-107036810	frame	placed	7	7	38.1	67.6	79.4	140.7
PZE-107040665	placed	placed	7	7	38.3	67.9	79.9	141.4
PZE-107040666	-	placed	-	7	-	67.9	-	141.4
PZE-107044795	placed	-	7	-	39.1	-	81.7	-
PZE-107066232	placed	-	7	-	48.8	-	103	-
PZE-108000394	placed	-	8	-	-0.9	-	-1.9	-
PZE-108035280	-	placed	-	8	-	86	-	179.7
PZE-108051160	-	placed	-	8	-	92.1	-	192.5
PZE-108070212	placed	placed	8	8	86.9	114.8	180	239.2
PZE-108072680	placed	-	8	-	90.2	-	186.8	-
PZE-108083889	-	placed	-	8	-	124.3	-	258.8
PZE-108123041	-	placed	-	8	-	187.2	-	389
PZE-109018122	-	frame	-	9	-	51.7	-	106.5
PZE-109018135	-	placed	-	9	-	51.7	-	106.5
PZE-109029455	placed	-	9	-	66.2	-	136.3	-
PZE-109029456	placed	-	9	-	66.2	-	136.3	-
PZE-109049162	placed	-	9	-	67.3	-	138.8	-
PZE-109053569	placed	-	9	-	68.5	-	141.4	-
PZE-109055561	placed	-	9	-	70.1	-	144.7	-
PZE-109055660	placed	-	9	-	70.1	-	144.7	-
PZE-109062292	frame	-	9	-	72.4	-	149.6	-
PZE-109086414	placed	-	9	-	89.1	-	184.7	-
PZE-109121159	placed	-	9	-	157.9	-	326.6	-
PZE-109121160	placed	-	9	-	157.9	-	326.6	-
PZE-110002468	placed	-	10	-	4.3	-	8.9	-
PZE-110037278	-	placed	-	10	-	36.6	-	75.9
PZE-110042307	placed	-	10	-	44.3	-	91.5	-
PZE-110048546	frame	-	10	-	47.1	-	97.1	-
PZE-110049820	placed	-	10	-	47.5	-	98	-
PZE-110049849	placed	-	10	-	47.5	-	98	-
PZE-110049851	placed	-	10	-	47.5	-	98	-
PZE-110049852	placed	-	10	-	47.5	-	98	-
PZE-110050719	placed	-	10	-	47.8	-	98.7	-
PZE-110058700	-	placed	-	10	-	54.6	-	113.4
SYN10180	placed	-	6	-	16.1	-	33.8	-
SYN10183	placed	-	6	-	16.1	-	33.8	-
SYN12129	frame	-	3	-	78.4	-	164.4	-
SYN12130	placed	-	3	-	78.4	-	164.4	-
SYN12989	placed	placed	2	2	27.9	47.6	57.6	101.1
SYN15486	placed	-	1	-	89.2	-	186.2	-
SYN17544	placed	-	1	-	89.5	-	186.7	-
SYN18227	placed	placed	10	10	42.5	36.6	87.9	75.9
SYN23194	placed	-	8	-	94.3	-	196.3	-
SYN23631	placed	-	6	-	90.8	-	189.4	-
SYN23982	placed	-	1	-	198.6	-	416.2	-
SYN24654	placed	placed	5	5	129	170	269	354.2
SYN24655	placed	placed	5	5	129	170	269	354.2
SYN25218	placed	-	7	-	123	-	258.3	-
SYN25219	placed	-	7	-	123	-	258.3	-
SYN27719	placed	placed	1	1	179.2	242.3	375.8	498.5
SYN27720	placed	placed	1	1	179.2	242.3	375.8	498.5
SYN28345	placed	placed	7	7	33.8	62.3	70	129.8
SYN28348	placed	-	7	-	33.8	-	70	-
SYN28351	placed	-	7	-	33.8	-	70	-
SYN29313	placed	-	2	-	98.2	-	203.8	-
SYN31296	placed	placed	3	3	76	69.5	159.2	144.1
SYN31568	placed	-	3	-	82.7	-	173.6	-
SYN31569	placed	-	3	-	82.7	-	173.6	-
SYN31570	placed	placed	3	3	82.7	79.2	173.6	164.1
SYN31577	placed	-	3	-	82.7	-	173.6	-
SYN31586	placed	placed	3	3	82.7	79.2	173.6	164.1
SYN32300	placed	placed	9	9	70.1	78.5	144.7	161.9
SYN34975	placed	-	2	-	51.2	-	106	-
SYN36415	placed	-	2	-	97.6	-	202.7	-
SYN3668	placed	-	8	-	78.1	-	161.9	-
SYN3669	placed	-	8	-	78.1	-	161.9	-
SYN3670	placed	-	8	-	78.1	-	161.9	-
SYN3672	placed	-	8	-	78.1	-	161.9	-
SYNGENTA16703	-	placed	-	5	-	164.4	-	342.7
SYNGENTA16705	-	placed	-	5	-	164.4	-	342.6
SYNGENTA17266	-	placed	-	8	-	100.4	-	209.4
ZM008460-0475	-	placed	-	3	-	223.6	-	460.8
ZM013298-0288	-	placed	-	10	-	-10.2	-	-22.5
ZM013526-0477	-	placed	-	6	-	50.6	-	105.8
ZM013608-0315	-	placed	-	2	-	43	-	92.1
