# Supplementary material for: A Large Maize (Zea mays L.) SNP Genotyping Array: Development and Germplasm Genotyping, and Genetic Mapping to Compare with the B73 Reference Genome
Source: PLoS One. 2011 Dec 8;6(12):e28334. doi: 10.1371/journal.pone.0028334 (PMC3234264; doi:10.1371/journal.pone.0028334)
Supplement: Table S13 — List of the 57,838 SNP markers that were put on the array, with their NCBI assay ID (ss#) in dbSNP. (XLS) [file pone.0028334.s019.xls]

## Sheet: 55kv2
Supplementary Table S13
List of the 57838 SNP markers that were put on the array
SNP Name	dbSNP #ss
PZA03613.2	ss196414328
PZA02129.1	ss196414331
PZA00393.1	ss196414334
PZA02869.8	ss196414337
PZD00021.2	ss196414339
PZD00020.2	ss196414341
PZD00020.4	ss196414343
PZD00081.2	ss196414346
PZD00019.1	ss196414348
zagl1.1	ss196414352
PZA01022.1	ss196414355
PZB00919.1	ss196414357
PHM1699.29	ss196414359
PZA00528.1	ss196414361
PZA00447.5	ss196414363
PZA00447.6	ss196414365
PZA00447.8	ss196414367
PZB01915.1	ss196414370
PZA00731.6	ss196414373
PZA00731.7	ss196414375
PZA03519.2	ss196414377
PZA03519.1	ss196414379
PZA03520.2	ss196414381
PZA03520.3	ss196414383
PZA00106.9	ss196414387
PZA03557.1	ss196414389
PZA03663.2	ss196414391
csu1171.2	ss196414393
PZA01497.1	ss196414396
PZA01652.1	ss196414398
PZB00718.3	ss196414400
PZB00718.5	ss196414402
PZA01914.15	ss196414405
PZA00358.12	ss196414407
PZA00425.11	ss196414409
PHM13619.5	ss196414411
PHM3226.15	ss196414413
PZA02487.1	ss196414416
PZD00096.1	ss196414419
PZD00098.3	ss196414421
PZD00098.2	ss196414423
PZA02921.9	ss196414426
PZB01957.1	ss196414428
PZB02058.2	ss196414431
PZB02058.1	ss196414433
PZB02058.3	ss196414435
PZA00654.12	ss196414438
PZA00654.10	ss196414440
PZB01662.2	ss196414442
PZB01662.1	ss196414445
PZA00017.1	ss196414447
PZA00017.4	ss196414449
PZA00192.7	ss196414451
PZA03345.5	ss196414453
PZA02271.1	ss196414456
PZA00240.6	ss196414458
PZA00240.9	ss196414460
PZA00240.8	ss196414462
PZA00240.4	ss196414464
PZA03243.3	ss196414466
PZA03243.2	ss196414470
PZA03742.1	ss196414472
umc13.1	ss196414474
PZA03183.3	ss196414477
PZA02328.3	ss196414479
PZA03100.4	ss196414483
PZA00661.6	ss196414485
PZA03673.2	ss196414487
PZA03673.1	ss196414489
PZA03672.1	ss196414491
PZB02095.3	ss196414493
PZB02095.2	ss196414495
PZB02095.1	ss196414498
PZA00468.8	ss196414500
PZA03168.1	ss196414502
PZA03168.5	ss196414504
PZA03746.5	ss196414506
PZA03746.1	ss196414509
PZA02550.1	ss196414511
PZA03767.5	ss196414513
PZB01273.3	ss196414515
PZA00328.1	ss196414518
PZA01315.1	ss196414520
PZA01476.1	ss196414522
PZA00294.20	ss196414524
PZA00294.22	ss196414527
PZA00294.4	ss196414529
PZA00263.13	ss196414531
PZA03500.1	ss196414533
PHM5098.25	ss196414535
PZA02791.9	ss196414538
PZD00076.1	ss196414540
PZD00076.4	ss196414542
PZA00714.1	ss196414545
PHM5306.16	ss196414547
PZA01267.3	ss196414550
PZA00752.1	ss196414553
PHM4185.17	ss196414555
PZA00119.4	ss196414558
PZA03466.1	ss196414561
PZA00593.1	ss196414565
PZA03240.4	ss196414567
PZA03407.5	ss196414569
PZA03407.4	ss196414571
PZA00944.1	ss196414575
PZA00705.1	ss196414577
PHM9418.11	ss196414579
PZA02763.1	ss196414581
PZA03014.9	ss196414583
PHM12633.15	ss196414585
PZA00301.3	ss196414587
PZA01254.1	ss196414590
PZA02070.1	ss196414592
PZA00205.7	ss196414594
csu1138.4	ss196414596
csu1138.3	ss196414598
PZB01067.1	ss196414600
PZA03394.1	ss196414602
PZA02577.1	ss196414605
PZA03028.5	ss196414607
PZA00098.14	ss196414610
PZA02135.2	ss196414612
PZB00963.2	ss196414614
PZB00963.1	ss196414616
PZA03580.2	ss196414618
PZA00375.4	ss196414620
PZA00375.2	ss196414622
PHM3147.18	ss196414624
PZA02191.1	ss196414626
PZA03532.2	ss196414628
PZA03531.1	ss196414630
PZB00149.2	ss196414632
PZD00053.4	ss196414636
PZA03427.1	ss196414638
PZA03427.2	ss196414640
PZA03074.27	ss196414643
PZA03686.2	ss196414645
PZB00400.1	ss196414648
PZB01156.2	ss196414650
PZB01077.7	ss196414652
PZB01077.1	ss196414655
PZB01077.3	ss196414657
PZA01216.1	ss196414659
PZA00131.14	ss196414661
PZA01391.1	ss196414663
PZA03218.2	ss196414665
PZA03194.1	ss196414667
PZA03193.2	ss196414669
PZA02023.4	ss196414671
PZA03545.1	ss196414673
PZA03632.2	ss196414675
PZA03631.1	ss196414677
PZA03631.2	ss196414679
PZA03630.1	ss196414682
PZA03630.2	ss196414684
PZA03443.1	ss196414686
PZA02117.1	ss196414688
PHM12693.8	ss196414690
PZB01979.2	ss196414692
PZA00658.21	ss196414694
PZA00658.19	ss196414696
PZB01647.1	ss196414698
PZA02567.1	ss196414700
PZB00011.1	ss196414702
PZB00011.6	ss196414704
PZB00116.2	ss196414706
PZA00381.5	ss196414708
PZB02144.4	ss196414710
an1.3	ss196414714
PZB00425.1	ss196414716
PZA03301.5	ss196414718
PZA03666.1	ss196414720
PZA03665.1	ss196414723
PZA03665.2	ss196414725
PZA03404.1	ss196414727
PZA01119.1	ss196414729
PZA00318.2	ss196414731
PZA03387.2	ss196414733
PZA00339.4	ss196414735
PZA01921.19	ss196414737
PZA00709.19	ss196414740
PZA00013.8	ss196414742
PZA03392.2	ss196414744
PZA03392.1	ss196414746
PZA00356.8	ss196414748
tb1.18	ss196414750
tb1.17	ss196414753
tb1.15	ss196414755
tb1.14	ss196414757
tb1.12	ss196414759
tb1.11	ss196414761
tb1.7	ss196414764
tb1.5	ss196414766
PZD00083.4	ss196414768
PZD00083.3	ss196414770
PZD00083.2	ss196414772
PZD00066.3	ss196414774
d8.2	ss196414776
PZB01728.7	ss196414779
PZB00083.3	ss196414781
PZB00895.1	ss196414783
PZB00008.1	ss196414785
PZB00001.1	ss196414787
PZB00063.1	ss196414789
PZB00063.6	ss196414791
PZB00063.2	ss196414793
PZA02278.1	ss196414795
PZB01427.1	ss196414797
PZB01427.2	ss196414799
PZB01427.5	ss196414801
PZA00698.4	ss196414803
PZB00114.1	ss196414805
PZB00178.2	ss196414807
PZB00067.5	ss196414809
PZD00039.1	ss196414812
PZD00039.4	ss196414815
PZD00039.2	ss196414817
PZD00039.3	ss196414819
PZA01978.23	ss196414822
PZA03188.3	ss196414824
PZA02957.5	ss196414827
PHM720.29	ss196414829
PZA02087.2	ss196414831
PZA00245.14	ss196414834
PZA00245.19	ss196414836
PZB01403.4	ss196414838
PZB01400.1	ss196414840
PZB01400.5	ss196414842
PZB01400.3	ss196414844
PZB01394.1	ss196414846
PZB01394.4	ss196414849
PZB01394.2	ss196414851
PHM2306.39	ss196414853
PZA03037.2	ss196414856
PZB00119.3	ss196414858
PZB02440.1	ss196414860
PZB02513.3	ss196414862
PZB02513.1	ss196414864
PZA03305.1	ss196414866
PZA03076.10	ss196414868
PZB01226.1	ss196414870
PZA03556.2	ss196414872
PZA03556.1	ss196414874
PZA02044.1	ss196414876
PZB02502.4	ss196414878
PZB02502.1	ss196414880
PZD00069.3	ss196414883
PZD00069.4	ss196414885
PZA00276.18	ss196414887
PZA00991.2	ss196414889
PZA00235.8	ss196414891
PZA00235.9	ss196414893
PZA00623.3	ss196414895
PZA00623.4	ss196414897
PZA02359.10	ss196414899
PZA01238.2	ss196414901
PZA00050.9	ss196414903
PZA00243.25	ss196414905
PZA00856.2	ss196414907
PHM1317.17	ss196414909
PHM8499.24	ss196414911
PZA00432.4	ss196414914
PZA00477.5	ss196414917
PZB01937.2	ss196414919
PZA00680.1	ss196414921
PZA00732.5	ss196414923
PZA00365.3	ss196414925
PZB02366.2	ss196414927
PZA02133.10	ss196414929
PZB02366.1	ss196414931
PZB02366.3	ss196414933
PZA02133.9	ss196414935
PHM13440.11	ss196414937
PZA02175.1	ss196414939
PZA00902.1	ss196414941
PZB02145.4	ss196414943
PZB01233.2	ss196414945
PZA01211.1	ss196414947
PZA00396.9	ss196414950
PHM12952.13	ss196414952
PHM3334.4	ss196414954
PZA00200.9	ss196414956
PZA00237.7	ss196414958
PZA00237.6	ss196414960
PZA00237.8	ss196414962
PZA03747.7	ss196414964
PZA03747.1	ss196414966
PZA03748.4	ss196414968
PZA03701.1	ss196414970
PZA03700.2	ss196414972
PZA03699.1	ss196414975
PZB00517.2	ss196414977
PZB00901.4	ss196414979
PZB00089.4	ss196414981
PZA02272.2	ss196414983
PZA02272.3	ss196414985
PHM14783.16	ss196414987
PZA00620.2	ss196414990
PZB00219.4	ss196414992
zfl2.9	ss196414994
PZA00108.12	ss196414997
PZA01753.1	ss196414999
PZA02337.4	ss196415002
PZA00459.5	ss196415005
PZA03442.1	ss196415007
PZA00497.4	ss196415009
PZA00497.1	ss196415011
PZA03415.1	ss196415013
PZB02020.3	ss196415015
PZB02017.2	ss196415017
PZB02017.5	ss196415019
PZB02017.4	ss196415021
PZB02017.3	ss196415023
PZA00349.4	ss196415025
PZA03635.1	ss196415027
PZA00590.1	ss196415029
PZA01879.1	ss196415031
PZA00471.2	ss196415033
PZA00471.4	ss196415035
PZA00471.3	ss196415037
PZB02167.2	ss196415039
PZB02167.1	ss196415041
PZB02035.2	ss196415043
PZB02035.3	ss196415045
PZB02035.1	ss196415047
abph1.22	ss196415049
abph1.15	ss196415051
PZA03567.1	ss196415053
PZA01374.1	ss196415055
PZA03121.2	ss196415057
PZB02523.1	ss196415059
PZB00257.1	ss196415061
PZB01230.5	ss196415063
PZB01231.1	ss196415065
PZB01231.3	ss196415067
PZA00226.6	ss196415071
PZB00017.1	ss196415073
PZB01370.2	ss196415075
PZA02450.1	ss196415077
PZA03775.6	ss196415079
PZA03775.3	ss196415081
PZA03756.1	ss196415083
PZA03756.2	ss196415085
PZA02362.10	ss196415088
PZA02881.9	ss196415090
PZA03478.1	ss196415092
PZA03410.1	ss196415094
PZA00170.1	ss196415096
PZA00170.3	ss196415098
PZA03358.4	ss196415100
PZA03358.2	ss196415102
PZA03358.3	ss196415104
PZA02946.8	ss196415106
PZA02549.3	ss196415108
PZB00607.1	ss196415110
PZA00291.7	ss196415112
PZA02966.10	ss196415114
PZA02966.11	ss196415116
PZA02831.2	ss196415118
PZA02831.5	ss196415120
PZA01930.3	ss196415122
PZB01969.1	ss196415124
PZB01487.2	ss196415126
PZB01500.1	ss196415128
PZB02511.1	ss196415130
PZA00140.7	ss196415132
PZA00277.13	ss196415134
PZA00029.17	ss196415137
PZA00029.12	ss196415140
PZA00029.11	ss196415142
PZB01285.2	ss196415144
PZB01285.1	ss196415146
PZA01280.2	ss196415148
PZA00720.2	ss196415151
pbf1.7	ss196415153
pbf1.6	ss196415156
pbf1.5	ss196415158
pbf1.3	ss196415160
PZA01537.2	ss196415162
PZA02939.6	ss196415165
PZA02939.5	ss196415167
PZA03539.2	ss196415169
PZA03083.7	ss196415171
PZB02119.1	ss196415173
PZB02235.5	ss196415175
PZB02235.3	ss196415177
PZA00367.6	ss196415179
PZA02632.1	ss196415181
PZA00478.7	ss196415183
PZA03692.2	ss196415185
PZA03690.1	ss196415187
PZA03418.2	ss196415189
PZA00515.12	ss196415191
PZA03707.2	ss196415193
PZA00495.5	ss196415195
PZA00495.4	ss196415197
PZA03644.1	ss196415199
PZA02082.6	ss196415201
PZA03659.1	ss196415203
PZA03659.3	ss196415205
PZA03661.3	ss196415207
PZA03661.1	ss196415209
PZA01735.1	ss196415211
PZA03528.3	ss196415213
PZA03528.1	ss196415215
PZA03529.6	ss196415217
PZA02890.5	ss196415219
PZA02890.4	ss196415221
PZA02890.3	ss196415223
PZD00042.2	ss196415225
PHM5060.12	ss196415227
PZA00479.9	ss196415229
PZA03384.2	ss196415231
PZA03641.1	ss196415233
PZA02017.7	ss196415235
PHM7953.11	ss196415237
PZA00340.1	ss196415239
PZB01267.2	ss196415241
PZB02013.1	ss196415243
PZB02013.2	ss196415245
PZB02013.3	ss196415247
PZB01261.1	ss196415249
PZB01261.2	ss196415251
PZB01103.2	ss196415253
PZB01103.1	ss196415255
PHM14412.4	ss196415257
PHM2773.30	ss196415259
PZA02077.1	ss196415261
PZA00390.7	ss196415263
PHM2094.31	ss196415265
PZA03293.2	ss196415267
PZA00676.2	ss196415269
PZA02471.5	ss196415273
PZA00527.10	ss196415275
PZA00164.3	ss196415277
PZA01991.3	ss196415279
PZA02266.3	ss196415281
PZA02727.1	ss196415283
PZA00672.8	ss196415285
PZA02170.1	ss196415287
PZA02382.7	ss196415289
PZD00022.5	ss196415291
PZD00022.2	ss196415293
PZD00022.3	ss196415295
PZD00022.1	ss196415297
PZA03576.2	ss196415299
PZA03576.3	ss196415301
PZA02012.7	ss196415303
PZA02977.4	ss196415305
PZA03423.2	ss196415307
PHM343.7	ss196415309
PZA00309.1	ss196415311
PZA00134.12	ss196415313
PZA00615.3	ss196415315
PZA02678.1	ss196415317
PZA00100.14	ss196415319
PZA00100.2	ss196415321
PZA03527.1	ss196415323
PZB00064.1	ss196415325
PZA01765.1	ss196415327
PZA03009.5	ss196415329
PZA03009.6	ss196415331
PZA00508.2	ss196415333
PZA03309.2	ss196415335
PZA03309.1	ss196415337
PZA00480.10	ss196415339
PZA02427.1	ss196415341
PZA00645.1	ss196415343
PZB01964.5	ss196415345
PHM2343.25	ss196415347
PZA00210.1	ss196415349
PZA02255.2	ss196415351
zb21.1	ss196415353
PZA00380.10	ss196415356
PZA00380.5	ss196415358
PHM13823.7	ss196415360
PZA01114.1	ss196415362
PZA01114.2	ss196415364
PHM13473.12	ss196415366
PZA03070.9	ss196415368
PHM15899.9	ss196415370
PZA01447.1	ss196415373
PZA00627.1	ss196415375
PZA02589.1	ss196415377
PHM12153.9	ss196415379
PZA00509.1	ss196415382
PZA03242.1	ss196415385
PZA00286.1	ss196415387
PZA02134.3	ss196415389
PZA00608.1	ss196415391
PZA00621.2	ss196415393
PZA03366.2	ss196415395
PZA03366.1	ss196415397
PZA00565.3	ss196415399
PZA02645.2	ss196415401
PZA01420.1	ss196415404
PZA03761.3	ss196415406
PZA03761.1	ss196415408
PZA03761.2	ss196415410
PZA03760.2	ss196415413
PZA02619.1	ss196415415
PZA03505.1	ss196415417
PZB00451.1	ss196415419
PZB00035.1	ss196415421
PZA03730.2	ss196415423
PZA03730.3	ss196415425
PZA03731.1	ss196415427
PZA00413.2	ss196415429
PZA00295.6	ss196415431
PZA00295.7	ss196415433
PZA00363.7	ss196415435
PZA00363.6	ss196415437
PZD00015.5	ss196415439
PZD00014.3	ss196415441
PZD00014.4	ss196415443
PZB02002.1	ss196415445
PZA02888.3	ss196415447
PZA00719.2	ss196415449
PZA00719.1	ss196415451
PHM4339.79	ss196415453
PZA02906.7	ss196415455
PZA02906.12	ss196415457
PZB02044.2	ss196415459
PZB02122.1	ss196415461
PZB01183.1	ss196415463
PZB00228.3	ss196415465
PZB00228.4	ss196415467
PZB00228.2	ss196415470
PHM1626.34	ss196415472
PZA00827.1	ss196415474
PZB01683.3	ss196415476
PZA00391.2	ss196415478
PZB02179.1	ss196415481
PZB02179.2	ss196415483
PZB02179.5	ss196415485
PZD00037.1	ss196415487
PHM9914.11	ss196415489
PZA00667.2	ss196415491
PZD00003.1	ss196415493
PZD00003.3	ss196415495
PZB01856.4	ss196415497
PZB01856.1	ss196415499
PZD00008.3	ss196415501
te1.1	ss196415503
PZD00007.1	ss196415506
PZA01396.1	ss196415508
PHM2885.31	ss196415510
PZB01933.2	ss196415512
PZA03073.26	ss196415514
PZA03073.28	ss196415516
PZD00027.2	ss196415518
PZD00027.3	ss196415520
PZA02402.1	ss196415522
PZA03032.18	ss196415524
PZA03475.1	ss196415526
PZA02009.15	ss196415528
PZA00783.1	ss196415530
PZA00166.1	ss196415532
PHM656.16	ss196415534
lg2.12	ss196415536
PZA02584.6	ss196415538
PZB01919.2	ss196415540
PZA03359.1	ss196415542
PZA03359.2	ss196415544
PZA03359.4	ss196415546
PZA00107.19	ss196415548
PZA03733.2	ss196415550
PZA03734.2	ss196415552
PZA03735.1	ss196415556
ba1.7	ss196415558
ba1.6	ss196415561
ba1.5	ss196415563
PZA00099.6	ss196415565
PZA03191.1	ss196415567
PZA03191.2	ss196415569
PZA03649.1	ss196415571
PZA03648.2	ss196415573
PZA03648.3	ss196415575
PZA00494.2	ss196415577
PZB01052.3	ss196415579
PZA00303.21	ss196415581
PHM3075.15	ss196415583
PZA03255.1	ss196415585
PZA03255.3	ss196415587
PZB02516.2	ss196415589
PZB02516.3	ss196415591
PZB01109.1	ss196415593
PZB01109.2	ss196415595
PZA02317.9	ss196415597
PZD00004.3	ss196415599
PZA03224.1	ss196415602
PZA03008.21	ss196415604
PZA03011.6	ss196415606
PZA03154.4	ss196415609
PZB01449.2	ss196415611
PZA00047.2	ss196415613
PZA02484.1	ss196415615
PZA00538.12	ss196415616
PZA00538.18	ss196415618
PZA00538.7	ss196415620
PZA03349.1	ss196415622
PZB01457.1	ss196415624
PHM13742.5	ss196415626
PZA03146.2	ss196415628
sh2.4	ss196415630
sh2.6	ss196415633
PZA01154.1	ss196415635
PHM3342.31	ss196415637
PZA02514.1	ss196415639
PZA02824.5	ss196415641
PZA02824.1	ss196415643
PZA03360.1	ss196415645
PZA03391.1	ss196415648
PZB00954.1	ss196415650
PZA00316.9	ss196415652
PZA01360.1	ss196415654
PZA02182.1	ss196415656
PZA00143.5	ss196415658
PZA02423.1	ss196415660
PZB01460.1	ss196415662
PZA03440.1	ss196415664
PZA03440.2	ss196415666
PZA03440.4	ss196415668
PZA03481.1	ss196415670
PZB00137.1	ss196415672
PZA03013.8	ss196415674
PZA00216.9	ss196415676
PZA03109.2	ss196415678
PZA03107.1	ss196415680
PHM14235.14	ss196415682
PHM14235.15	ss196415684
PHM14235.17	ss196415686
PZA03227.1	ss196415688
PZA02385.6	ss196415690
PZA02385.5	ss196415692
PZA00078.2	ss196415694
PZA01240.2	ss196415696
PZA00139.4	ss196415698
PHM4901.9	ss196415700
PZB01619.2	ss196415702
PZA02457.1	ss196415704
PZA03643.2	ss196415706
PZA03643.1	ss196415708
PZA03247.2	ss196415710
PZA00125.2	ss196415712
PZA00125.8	ss196415714
PHM14717.2	ss196415717
su1.1	ss196415719
PHM3587.6	ss196415722
PZA00726.8	ss196415724
PHM14055.6	ss196415726
PZB00129.1	ss196415728
bt2.2	ss196415731
bt2.4	ss196415734
bt2.5	ss196415736
bt2.8	ss196415738
PZA03706.1	ss196415740
PZA03254.1	ss196415744
PZA03254.2	ss196415746
PZA03254.3	ss196415748
PZA03705.1	ss196415750
PZA03751.1	ss196415752
PZA03752.2	ss196415754
PZA03752.1	ss196415756
PZA03753.2	ss196415758
PZA03753.1	ss196415760
PZA03587.1	ss196415762
PZA03597.1	ss196415764
PZA00218.1	ss196415766
PZA02767.1	ss196415768
PZA03203.2	ss196415770
PZA03367.2	ss196415772
PZA03367.1	ss196415774
PZA03231.1	ss196415776
PZA03536.1	ss196415778
PZA03483.1	ss196415780
PZA00092.5	ss196415782
PZB02053.3	ss196415784
PZB02053.2	ss196415786
PZA00549.3	ss196415788
PZA03376.1	ss196415790
PZA03376.2	ss196415792
PZB00093.2	ss196415794
PZA00662.3	ss196415796
PZA03409.1	ss196415798
PZA03409.2	ss196415800
PZB01080.2	ss196415802
PZB01689.1	ss196415804
PZB01689.2	ss196415806
PZA00151.2	ss196415809
Fea2.2	ss196415811
fea2.3	ss196415814
Fea2.5	ss196415816
PZD00067.3	ss196415818
PZA02988.2	ss196415820
PZA03459.1	ss196415822
PZA02147.1	ss196415824
PZA03152.3	ss196415826
PZA02982.6	ss196415828
PZA02982.7	ss196415830
PZA00523.3	ss196415832
PZA02992.15	ss196415834
PZA02992.8	ss196415836
PZA02992.1	ss196415838
PHM15864.8	ss196415840
PZA03311.4	ss196415842
PZB00229.1	ss196415844
PZB00229.3	ss196415846
PZB00092.1	ss196415848
PZB00092.2	ss196415850
PZB00229.2	ss196415852
PZA00464.6	ss196415854
PZA03653.1	ss196415856
PZA03654.1	ss196415858
PZA03654.2	ss196415860
PZA00453.7	ss196415862
PZA03379.1	ss196415864
PZA03308.3	ss196415866
PZA00271.1	ss196415868
PZA02819.40	ss196415870
PZB02464.1	ss196415872
PZD00031.4	ss196415874
PZD00030.9	ss196415876
PZD00029.4	ss196415878
PZA02194.1	ss196415880
PZA02289.2	ss196415883
PZB01090.1	ss196415885
PZA02949.22	ss196415887
PZA02949.26	ss196415889
PZA00332.3	ss196415891
PZA00332.7	ss196415893
PZA00332.5	ss196415895
PZA00193.1	ss196415897
PZA03575.2	ss196415899
PZA03575.4	ss196415901
PZA03205.1	ss196415903
PZA01810.2	ss196415905
PZA02421.1	ss196415907
PZA03719.1	ss196415909
PZA03720.2	ss196415911
PZA01332.2	ss196415913
PZA01332.1	ss196415915
PZA03081.9	ss196415916
PZA03081.10	ss196415918
PZB01021.5	ss196415920
PZA03271.1	ss196415923
PZA02479.1	ss196415925
PZA00155.1	ss196415927
PZA03150.1	ss196415929
PZA03155.3	ss196415931
PZB00878.2	ss196415933
PZB00724.1	ss196415934
PZA00878.1	ss196415935
PZA00521.3	ss196415937
PZA03754.2	ss196415939
PZA03754.1	ss196415941
PZA00209.4	ss196415943
PHM5780.15	ss196415945
PZA03077.10	ss196415947
PZA02124.14	ss196415949
PZA00005.8	ss196415951
PZA00005.2	ss196415953
PZA03598.1	ss196415955
PZA02239.11	ss196415957
PHM4348.16	ss196415959
PZA00493.2	ss196415961
PZA02367.1	ss196415963
PZA01699.1	ss196415965
PHM3714.12	ss196415967
PZA02316.21	ss196415969
PZB01352.2	ss196415971
PZA01570.1	ss196415973
PHM14671.9	ss196415977
PZA00089.3	ss196415979
PZA02653.12	ss196415981
PZA02462.1	ss196415983
PZB00081.4	ss196415985
PZB00081.7	ss196415987
PZA03584.1	ss196415989
PZA02538.5	ss196415991
PZB01993.2	ss196415993
PZA02029.19	ss196415995
PZA01925.1	ss196415997
PHM9676.10	ss196415999
PZB00188.2	ss196416001
PZB00182.1	ss196416003
PZA03244.3	ss196416005
PZA03244.5	ss196416007
PZA03244.1	ss196416009
PZB00079.4	ss196416011
PZA03678.1	ss196416013
PZA03092.7	ss196416015
PZB01642.1	ss196416017
PZB01642.2	ss196416019
PZA00004.2	ss196416021
PZA00985.1	ss196416023
PZA01327.1	ss196416025
PZA00968.3	ss196416027
PZA01393.15	ss196416029
PZB00223.1	ss196416031
PZA03226.3	ss196416033
PZA03274.4	ss196416035
PZA02792.24	ss196416037
PZA02792.16	ss196416039
PZA03298.2	ss196416041
PZA01427.1	ss196416043
PZA02246.9	ss196416046
PHM9009.13	ss196416048
PZA00934.2	ss196416050
PZB00579.2	ss196416052
PZB00579.1	ss196416054
PZB00869.4	ss196416056
PZA01563.1	ss196416058
PZA03621.1	ss196416060
PZA00981.3	ss196416062
PHM3691.15	ss196416064
PHM6795.5	ss196416066
PZA02207.1	ss196416068
PZA00401.6	ss196416070
PZA00222.5	ss196416072
PZA01603.1	ss196416074
PHM1870.20	ss196416076
PZA03451.7	ss196416078
PZA03451.6	ss196416080
PZA02676.2	ss196416082
PZB01271.1	ss196416084
PZA03426.1	ss196416086
PZA00710.1	ss196416088
PZA00710.16	ss196416090
PZA03494.1	ss196416092
PZA00345.15	ss196416094
PZB01336.6	ss196416096
PZB01336.5	ss196416098
PZB01336.3	ss196416100
PZA03411.3	ss196416102
PZA03411.2	ss196416104
PZB00232.3	ss196416106
PZB00232.1	ss196416108
PZB02023.1	ss196416110
PZB02023.2	ss196416112
PZA03095.3	ss196416114
PZA03095.1	ss196416116
PZA03095.2	ss196416118
PZA00626.4	ss196416120
PZA00626.3	ss196416122
PZA03356.1	ss196416124
PZB01112.3	ss196416126
PZA01671.1	ss196416128
PHM5798.39	ss196416130
PZA00261.6	ss196416132
PZA03594.1	ss196416134
PZA02818.6	ss196416136
PZA03782.1	ss196416138
PZA03782.3	ss196416140
PZA01779.1	ss196416142
PZB02425.3	ss196416144
PZA03049.23	ss196416146
PZA03049.24	ss196416148
PZA00406.1	ss196416152
PZA03284.3	ss196416154
PZA03284.4	ss196416156
PZB02059.3	ss196416158
PZA00547.8	ss196416160
PZA00547.6	ss196416162
PZA00547.14	ss196416164
PZB01632.1	ss196416166
PZB00969.1	ss196416168
PZA00067.8	ss196416170
PZA00067.10	ss196416172
PZA01608.1	ss196416174
PZA03781.3	ss196416176
PZA03781.4	ss196416178
PZA03781.8	ss196416180
PZB00619.1	ss196416182
PZB01331.2	ss196416184
ae1.8	ss196416186
ae1.4	ss196416189
PZA00674.4	ss196416191
PZB02151.2	ss196416193
PZA00255.17	ss196416195
PZA02040.2	ss196416197
PZA00300.12	ss196416199
PZA00300.16	ss196416201
PZA03704.1	ss196416203
PZA00987.1	ss196416205
PHM13696.11	ss196416207
PZA03717.1	ss196416209
PZA03716.2	ss196416211
PZA03714.4	ss196416213
PZA03714.3	ss196416215
PZD00056.3	ss196416217
PZB00213.4	ss196416219
PZA01304.1	ss196416221
PZA02633.4	ss196416223
PZA02356.7	ss196416225
PZA03774.1	ss196416227
PZA03774.8	ss196416229
PZA01575.1	ss196416231
PZA03452.6	ss196416233
PZA02629.16	ss196416235
PZB02033.1	ss196416237
PZA02788.12	ss196416239
PZB02005.2	ss196416241
PZB02005.1	ss196416243
PZA02383.1	ss196416245
PZA03507.1	ss196416247
PZA02411.2	ss196416249
PZA02411.3	ss196416251
PZA03050.11	ss196416253
PHM532.23	ss196416255
PZA03312.2	ss196416257
PZA03312.1	ss196416259
PZA03618.4	ss196416261
PZA03618.2	ss196416263
PZA03618.1	ss196416265
PZA00652.17	ss196416267
PZB02283.1	ss196416269
PZB02424.1	ss196416271
PZA03682.1	ss196416273
PZA01265.1	ss196416275
PZA00980.1	ss196416277
PZB02189.6	ss196416279
PZB00686.2	ss196416281
PZA00545.21	ss196416283
PZA03167.5	ss196416285
PZA01680.3	ss196416287
PZA00448.6	ss196416289
PZA00836.1	ss196416291
PZA00500.5	ss196416293
PZA03339.3	ss196416295
PZA03335.2	ss196416297
PZA00433.3	ss196416299
PZA00069.4	ss196416301
PZA02480.1	ss196416303
PHM13639.13	ss196416305
PZA01060.1	ss196416307
PHM662.27	ss196416309
PZA01983.1	ss196416311
PZA00606.3	ss196416313
PZA00606.10	ss196416315
PZA03003.11	ss196416317
PZA03003.10	ss196416319
PZA03290.1	ss196416321
PZA03290.2	ss196416323
PZA03047.22	ss196416325
PZA03047.12	ss196416327
PZA03063.21	ss196416329
PZA00540.3	ss196416331
PZA00462.2	ss196416333
PZA03120.1	ss196416336
PZA03120.3	ss196416338
PZA01527.1	ss196416340
PZA02714.5	ss196416342
PZB00236.2	ss196416344
PZA03668.2	ss196416346
PZA03668.3	ss196416348
PZA03667.2	ss196416350
PZB01092.5	ss196416352
PZA00543.12	ss196416354
PZB00645.1	ss196416356
PZB01446.1	ss196416358
PZB01446.3	ss196416360
PZB01446.2	ss196416362
PZA03069.4	ss196416365
PZA03069.8	ss196416367
PZB01009.4	ss196416369
PZB01009.2	ss196416371
PZA00006.16	ss196416373
PHM12904.7	ss196416375
PZA03732.3	ss196416377
PZA00578.2	ss196416379
PZA00578.1	ss196416381
PZB01881.11	ss196416383
PZB01877.1	ss196416385
PZB01658.2	ss196416387
PZA00187.8	ss196416389
PZB00857.1	ss196416391
PZB00555.3	ss196416393
PZA00182.4	ss196416395
PZA01589.2	ss196416397
PZA00382.28	ss196416399
PHM13451.15	ss196416401
PZA01055.1	ss196416403
PHM1190.3	ss196416405
PZA00571.2	ss196416407
PZA00003.5	ss196416409
PZA00003.11	ss196416411
PZA02625.1	ss196416413
PZA01729.1	ss196416415
PZA00473.5	ss196416417
PZA00473.9	ss196416419
PZA01591.1	ss196416421
PZA01104.1	ss196416423
PHM4870.7	ss196416425
PZA01552.1	ss196416427
PZB00416.2	ss196416429
PZD00011.3	ss196416431
PZD00011.4	ss196416433
PZA00250.1	ss196416435
PZA00357.19	ss196416437
PZA02262.3	ss196416439
PZA03068.11	ss196416443
PZA02478.6	ss196416445
PZA02673.1	ss196416447
PZA02148.1	ss196416449
PZB00942.1	ss196416451
PZB01308.3	ss196416453
PZA03102.2	ss196416455
PZB02514.1	ss196416457
PZB01549.1	ss196416460
PZA02811.5	ss196416462
PZA00160.3	ss196416465
PHM11985.27	ss196416467
PZA01342.2	ss196416469
PZA02472.2	ss196416471
PZA02830.9	ss196416473
PHM15251.3	ss196416475
PZA03646.1	ss196416477
PZA03027.12	ss196416479
PZA00223.4	ss196416481
PHM597.12	ss196416483
PZA03348.1	ss196416486
PZA00124.2	ss196416488
PHM16607.11	ss196416490
PZB01569.8	ss196416492
PZA01468.1	ss196416494
PZA01436.1	ss196416497
PZA02688.2	ss196416499
PZA03449.3	ss196416501
PZA02141.1	ss196416503
PHM5361.13	ss196416505
PZA00910.1	ss196416507
PHM5529.7	ss196416509
PHM5529.4	ss196416511
PHM3466.69	ss196416513
PZA02815.25	ss196416515
PZA02948.21	ss196416517
PZA03504.1	ss196416519
PZA01426.1	ss196416522
PZD00057.3	ss196416524
PZB01083.4	ss196416526
PZB01083.1	ss196416529
PZB01083.2	ss196416531
PZA02983.28	ss196416533
PZA03757.1	ss196416535
PHM2691.32	ss196416537
PZB02215.4	ss196416539
PZB02542.1	ss196416541
PZB02542.2	ss196416543
PZB01617.2	ss196416545
PZB01612.2	ss196416547
PZB01612.3	ss196416549
PZB01612.1	ss196416551
PZA00256.16	ss196416553
PZA03623.2	ss196416555
PZA03624.1	ss196416558
PZA03624.2	ss196416560
PZA03624.3	ss196416562
PZA03625.1	ss196416564
PHM4080.15	ss196416566
PZA03344.2	ss196416568
PHM15501.9	ss196416570
PZA00132.3	ss196416572
PZA00132.18	ss196416574
PZA00260.1	ss196416576
PZA03687.1	ss196416578
PZA03565.2	ss196416580
PZA00084.2	ss196416582
PZA03723.4	ss196416584
PZA03723.2	ss196416587
PZA03723.5	ss196416589
PZA03722.1	ss196416591
PZA01936.4	ss196416593
PZA02612.1	ss196416595
PZA03363.1	ss196416597
PZA03676.4	ss196416599
PZA03676.2	ss196416601
PZA03676.3	ss196416603
PZA03675.1	ss196416605
PZA03675.2	ss196416607
PZB00635.1	ss196416609
PZA03386.1	ss196416611
PHM12830.14	ss196416613
PZA03645.1	ss196416615
PZA03645.2	ss196416617
PZA02291.1	ss196416619
PZA01210.2	ss196416621
PZA03471.1	ss196416623
PZA01933.3	ss196416625
PZA01673.1	ss196416627
PZB00109.2	ss196416629
PZA03143.4	ss196416631
PZB00174.4	ss196416633
PZB00174.5	ss196416635
PZB00175.6	ss196416637
PZB01186.3	ss196416639
PZB01186.2	ss196416641
PZB01186.1	ss196416643
PZA03477.1	ss196416645
PZA02365.7	ss196416647
PZB02139.1	ss196416649
PZA00370.1	ss196416651
PZA01690.1	ss196416654
PZA01946.7	ss196416656
PZA01714.1	ss196416658
PZD00054.1	ss196416660
PZA00040.19	ss196416662
PZB00752.1	ss196416664
PZA03739.1	ss196416666
PZA00111.4	ss196416668
PZA00740.3	ss196416670
PZA03728.1	ss196416672
PZA03258.2	ss196416674
PZA00346.2	ss196416677
PZA00346.1	ss196416679
PZA03574.3	ss196416681
PZA03574.2	ss196416683
PZA00504.2	ss196416685
PZA02004.4	ss196416687
PZA03397.1	ss196416689
PZA03162.1	ss196416691
PHM6608.5	ss196416693
PZB00062.7	ss196416696
PZB00062.9	ss196416698
PZA00614.1	ss196416700
PZA00614.12	ss196416702
PZA00670.2	ss196416704
PZA03176.4	ss196416706
PZA02959.12	ss196416708
PZA03329.1	ss196416710
PZA00326.13	ss196416712
PZA02386.2	ss196416714
PHM424.13	ss196416716
PZA03544.5	ss196416718
PZA03544.3	ss196416720
PZA03544.2	ss196416722
PZD00045.3	ss196416724
PZD00043.2	ss196416726
PZB00777.2	ss196416728
PZA00474.14	ss196416730
PZB00597.1	ss196416733
PZB00595.3	ss196416735
PZA00227.8	ss196416737
PZA02373.1	ss196416739
PZA00505.5	ss196416742
PZA03368.1	ss196416744
PZA01414.1	ss196416746
PZA00386.2	ss196416749
PZB02448.2	ss196416751
PZA00695.1	ss196416753
PZA00695.3	ss196416755
PZA00695.2	ss196416757
PZB00605.3	ss196416759
PZA00423.16	ss196416762
PZA00043.7	ss196416764
PZA00043.1	ss196416766
PZA00424.1	ss196416768
PZB01638.1	ss196416770
PZA03117.3	ss196416772
PZA03117.2	ss196416774
PZA00486.2	ss196416776
PZB02544.1	ss196416778
PZB02544.2	ss196416781
PZB02544.3	ss196416783
PZB02547.1	ss196416785
PZA02388.1	ss196416787
PZA03316.2	ss196416789
PZA01623.3	ss196416791
PZA00058.1	ss196416793
PZA00058.6	ss196416795
PZA03178.1	ss196416797
PZA02249.4	ss196416799
PHM9695.9	ss196416802
PZA01079.1	ss196416804
PZA02955.3	ss196416806
PZB01977.2	ss196416808
PZB01977.7	ss196416810
PZB01977.11	ss196416812
PZB01977.4	ss196416814
PZB01977.5	ss196416816
PZB01977.1	ss196416818
PZB00049.2	ss196416820
PHM6428.11	ss196416822
PZA00481.7	ss196416824
PZA03510.1	ss196416826
PZA03381.1	ss196416828
PZB00145.2	ss196416830
PZB00041.4	ss196416832
PZB00041.2	ss196416834
PZB00041.3	ss196416836
PZA00498.5	ss196416838
PZA01209.1	ss196416840
PZA00417.3	ss196416842
PZA00417.2	ss196416844
PZA00793.2	ss196416846
PZA00379.2	ss196416848
PZA03789.1	ss196416850
PZA03789.4	ss196416852
PZA01257.1	ss196416854
PZA03035.5	ss196416856
PZA03408.1	ss196416858
PZA00452.1	ss196416860
PZA00452.4	ss196416862
PZA01301.1	ss196416864
PZA01297.1	ss196416866
PZA00600.11	ss196416868
PZA03736.1	ss196416870
PZA02019.1	ss196416872
PZA03508.1	ss196416874
PZA03543.1	ss196416876
PZA03543.3	ss196416878
PZB01883.2	ss196416880
PZB01883.4	ss196416882
PZA03012.12	ss196416885
PZA03012.10	ss196416887
PZA00045.4	ss196416889
PZA00045.1	ss196416891
PZA00567.10	ss196416893
PZA03509.1	ss196416895
PZA03639.1	ss196416898
PZA03638.3	ss196416900
PZA03638.2	ss196416902
PZA03637.1	ss196416904
PZA03637.3	ss196416906
PZB02161.1	ss196416908
PZB02159.2	ss196416910
PZB02159.1	ss196416912
PZB01201.1	ss196416914
PZB02155.1	ss196416916
PZA00093.2	ss196416918
PZA01038.1	ss196416920
PZB00865.2	ss196416922
PZB00592.1	ss196416924
PZA00531.1	ss196416926
PHM10525.11	ss196416928
PZA00419.1	ss196416930
PZA00272.3	ss196416932
PZA00272.2	ss196416934
PZA00118.1	ss196416936
PZB02534.3	ss196416938
PZB02534.4	ss196416940
PZA03241.5	ss196416942
PZB02534.1	ss196416944
PZB02534.2	ss196416946
PZA03612.4	ss196416948
PZA03612.3	ss196416950
PZA03612.2	ss196416952
PZA01049.1	ss196416954
PZA03052.15	ss196416956
PZA03395.5	ss196416959
PZA03395.4	ss196416961
PZA03395.3	ss196416963
PZA00049.12	ss196416965
PZA03005.19	ss196416967
PHM15784.5	ss196416969
PZB01389.2	ss196416971
PZB01389.1	ss196416973
PZA03591.2	ss196416975
PZA00090.4	ss196416977
PZA03608.2	ss196416979
PZA03608.1	ss196416981
PZA00168.14	ss196416983
PZA00142.3	ss196416985
PZB01454.3	ss196416987
PZB01454.6	ss196416989
PZA03650.2	ss196416992
PZA03651.1	ss196416994
PZA03652.2	ss196416996
PZA00686.8	ss196416998
PZA03182.4	ss196417000
PZA02403.12	ss196417002
PZA00422.5	ss196417004
PZA00422.6	ss196417006
PHM15278.6	ss196417008
PZA03695.2	ss196417010
PZA03695.1	ss196417012
PZA03696.3	ss196417014
PZA03696.1	ss196417016
PZA03696.2	ss196417018
PZA03697.1	ss196417020
PZA03698.1	ss196417022
PZA03698.3	ss196417024
PZA03698.2	ss196417026
PZA00838.2	ss196417028
PHM15623.10	ss196417030
PZB00811.1	ss196417032
PZA03388.2	ss196417034
PZA03592.3	ss196417036
PZA03593.1	ss196417038
PZB01107.6	ss196417040
PZB01107.2	ss196417042
PZB00700.1	ss196417044
PZA00460.8	ss196417046
PHM4560.54	ss196417048
PZA00516.2	ss196417051
PZA00020.1	ss196417053
PHM3213.11	ss196417055
PZA00001.8	ss196417057
PHM13493.12	ss196417060
PZA00641.7	ss196417062
PZA00298.5	ss196417064
PZA01964.29	ss196417066
PZB01057.1	ss196417068
PZA03202.2	ss196417070
PZA00189.23	ss196417072
PZA01290.1	ss196417074
PZA02281.3	ss196417076
PZB01872.1	ss196417078
PZB01872.2	ss196417080
PHM5805.19	ss196417082
PZA00596.1	ss196417084
PZA00285.3	ss196417086
PHM11946.19	ss196417088
sh1.4	ss196417091
sh1.11	ss196417093
sh1.12	ss196417095
sh1.1	ss196417097
PZA00466.2	ss196417099
PZA00466.1	ss196417101
PZA02344.1	ss196417103
PZA03431.1	ss196417105
PZD00049.4	ss196417107
zmm3.1	ss196417109
PZD00047.1	ss196417111
PZA03416.7	ss196417113
PZA03416.6	ss196417115
PHM9374.5	ss196417117
PZA01272.1	ss196417119
PZA00583.4	ss196417122
PHM12527.5	ss196417124
PZA00438.4	ss196417126
PZA00283.1	ss196417128
PZB01042.5	ss196417130
PZB01042.1	ss196417132
PZB01110.6	ss196417134
PZB01110.1	ss196417136
PZB01963.2	ss196417138
PZB01963.6	ss196417140
PZB01963.3	ss196417142
PZB01963.1	ss196417144
PZA02648.2	ss196417146
PZB00379.3	ss196417148
PHM4495.14	ss196417150
PHM1871.19	ss196417152
PZB02423.1	ss196417154
PHM229.15	ss196417156
PZB00235.1	ss196417158
PZA03786.1	ss196417160
PZA02878.12	ss196417162
PZA02878.13	ss196417164
PZA02861.13	ss196417167
PZA02861.12	ss196417169
PZA03469.1	ss196417171
PZA03097.4	ss196417173
PZB02422.1	ss196417175
PZB01114.1	ss196417177
PZA03473.1	ss196417179
PZA03057.3	ss196417182
PZA01791.2	ss196417184
PZA03759.2	ss196417186
PZA03759.1	ss196417188
PZA03758.1	ss196417190
PZB00761.1	ss196417193
PZA01062.1	ss196417195
PZA03595.2	ss196417197
PZA03595.1	ss196417199
PZA03596.2	ss196417201
PZA03596.3	ss196417203
PZA03596.1	ss196417205
PZA02897.12	ss196417207
PZA00947.1	ss196417209
PZB01899.1	ss196417211
PZB01899.2	ss196417213
PZA03253.2	ss196417215
PZB02480.2	ss196417217
PZB02480.1	ss196417219
PZB01358.3	ss196417221
PZA00152.1	ss196417223
PZA03468.1	ss196417225
PZA03470.1	ss196417227
PZB01913.2	ss196417229
PZB01867.5	ss196417231
PZB01867.2	ss196417233
PZA03235.2	ss196417235
PZB01292.1	ss196417237
PZB01292.3	ss196417239
PZB01432.1	ss196417241
PZB01432.3	ss196417243
PZB01432.4	ss196417245
PZB01432.2	ss196417247
PZA02348.3	ss196417249
PZB02504.3	ss196417251
PZB02099.2	ss196417253
PZA03670.1	ss196417255
PZB00207.3	ss196417257
PZA02235.14	ss196417259
PHM7916.4	ss196417261
PHM1599.84	ss196417263
PZB01436.1	ss196417265
PZB00118.2	ss196417267
PZB00221.6	ss196417269
PZD00055.1	ss196417271
PZA02197.13	ss196417273
PZA02197.1	ss196417275
PZA00323.3	ss196417277
PZA00323.4	ss196417280
PZA01715.1	ss196417282
PZA02381.1	ss196417285
PHM7931.5	ss196417287
PZD00050.2	ss196417289
PZA03573.2	ss196417291
PZA03573.3	ss196417293
PZA03573.4	ss196417295
PZA03572.2	ss196417297
PZA00184.4	ss196417299
PHM8549.4	ss196417301
PZA00589.12	ss196417303
PZA02554.1	ss196417305
PZA01313.2	ss196417307
PZA02095.10	ss196417309
PZA01451.1	ss196417311
PZA01883.2	ss196417313
PZB01301.7	ss196417315
PZB01301.6	ss196417317
PHM15331.16	ss196417319
PZA00463.3	ss196417321
PZA02961.1	ss196417323
PHM14499.11	ss196417325
PZA00656.18	ss196417327
PZA00656.16	ss196417329
PZA00656.15	ss196417331
PHM3922.32	ss196417333
PHM6822.4	ss196417335
PZA00552.4	ss196417337
PHM16871.6	ss196417339
PZD00033.3	ss196417341
PZB01178.1	ss196417343
PZB00849.1	ss196417345
PZA03342.2	ss196417347
PZA03491.1	ss196417349
PZA03479.1	ss196417351
PZA01597.1	ss196417353
PZA00562.4	ss196417355
PZA00562.3	ss196417357
PZA00562.5	ss196417359
PZA00409.3	ss196417361
PZA00665.6	ss196417363
PZA01677.1	ss196417365
PZA03480.1	ss196417367
PZA02941.2	ss196417369
PZA02941.3	ss196417371
PZA02941.6	ss196417373
PZA01877.2	ss196417375
PHM9266.23	ss196417377
PHM9266.21	ss196417379
PHM9266.25	ss196417381
PZA00587.3	ss196417383
PZA00587.4	ss196417385
PZB02529.2	ss196417387
PZB02529.1	ss196417389
PZA03051.3	ss196417391
PZA00048.2	ss196417393
PZA00048.1	ss196417395
PZA00400.3	ss196417397
PZB01206.2	ss196417399
PZA03585.1	ss196417401
PZA02993.5	ss196417403
PZA02993.14	ss196417405
PHM18195.6	ss196417407
PZB00806.9	ss196417409
PZA01292.1	ss196417411
PZA02128.3	ss196417413
PZB02237.1	ss196417415
PZA01089.1	ss196417417
PHM13687.14	ss196417419
PZA00712.4	ss196417421
PZA03711.3	ss196417423
PZA03711.1	ss196417425
PZA03710.6	ss196417427
PZA03709.1	ss196417429
PZA03709.2	ss196417431
PZB02227.3	ss196417433
PZA03196.1	ss196417435
PZA00063.3	ss196417437
PZB01412.2	ss196417439
PZA00204.1	ss196417442
PZA03071.15	ss196417444
PZA00342.9	ss196417446
PZB01997.1	ss196417448
PZB01111.7	ss196417450
PZA03398.2	ss196417452
PZA03398.1	ss196417454
PZA02663.1	ss196417456
PZA03570.2	ss196417458
PZA03570.1	ss196417460
PZA03569.2	ss196417462
PZA03501.1	ss196417464
PZA03502.1	ss196417466
PZA01995.2	ss196417468
PZA03607.3	ss196417470
PZB02554.3	ss196417471
PZB02554.2	ss196417473
PZB02554.1	ss196417475
PZA00130.9	ss196417477
PZA00130.7	ss196417479
PZA00007.1	ss196417481
PZB00769.1	ss196417483
PZB01471.3	ss196417485
PZB01471.1	ss196417488
PHM1506.18	ss196417490
PZA03402.1	ss196417492
PHM16788.6	ss196417494
PHM16788.7	ss196417497
PHM5735.31	ss196417499
PZA00270.1	ss196417501
PZA00270.4	ss196417503
PZA00335.12	ss196417506
PZA00566.5	ss196417508
PZA01462.1	ss196417510
PZA02868.11	ss196417512
PZA02868.9	ss196417514
PZA03313.3	ss196417516
PZA03380.1	ss196417518
PZB00073.1	ss196417520
PZB00083.2	ss196417522
PZB00141.1	ss196417524
PZB02510.5	ss196417526
PZD00026.5	ss196417528
MZB00125.2	ss196417530
PHM1438.34	ss196417533
PHM14519.8	ss196417535
PHM3309.8	ss196417537
PHM3630.8	ss196417539
PHM482.27	ss196417541
PHM4955.12	ss196417543
PHM789.16	ss196417545
PZA00065.2	ss196417547
PZA00086.8	ss196417549
PZA00103.20	ss196417551
PZA00153.3	ss196417553
PZA00153.6	ss196417555
PZA00153.7	ss196417557
PZA00311.4	ss196417559
PZA00560.2	ss196417561
PZA00755.2	ss196417563
PZA01034.1	ss196417565
PZA01039.1	ss196417567
PZA01726.1	ss196417569
PZA01866.1	ss196417571
PZA01993.7	ss196417573
PZA02167.2	ss196417575
PZA02296.1	ss196417577
PZA02474.1	ss196417579
PZA02862.10	ss196417581
PZA02919.1	ss196417583
PZA02984.10	ss196417585
PZA03036.23	ss196417587
PZA03171.3	ss196417589
PZA03317.1	ss196417591
PZA03338.2	ss196417593
PZA03338.6	ss196417595
PZA03370.1	ss196417597
PZA03489.1	ss196417599
PZA03490.1	ss196417601
PZA03530.2	ss196417603
PZA03530.3	ss196417606
PZA03578.1	ss196417608
PZA03603.3	ss196417610
PZB01236.1	ss196417613
PZB01730.3	ss196417615
PZB01944.3	ss196417617
PZB02176.1	ss196417619
PZD00052.4	ss196417621
PZD00084.2	ss196417623
bt-000002007	ss196417625
PZA-000061001	ss196417628
PZA-000148003	ss196417630
PZA-000175002	ss196417632
PZA-000211007	ss196417635
PZA-000222007	ss196417637
PZA-000310005	ss196417639
PZA-000349003	ss196417641
PZA-000399010	ss196417643
PZA-000403005	ss196417645
PZA-000405002	ss196417647
PZA-000422002	ss196417649
PZA-000429001	ss196417651
PZA-000492026	ss196417653
PZA-000516003	ss196417655
PZA-000524002	ss196417657
PZA-000527006	ss196417659
PZA-000536002	ss196417661
PZA-000655001	ss196417663
PZA-000667001	ss196417665
PZA-000717015	ss196417667
PZA-000749001	ss196417670
PZA-000881001	ss196417673
PZA-000892005	ss196417675
PZA-000904001	ss196417678
PZA-000908002	ss196417680
PZA-000933003	ss196417682
PZA-000996001	ss196417684
PZA-001238001	ss196417686
PZA-001410001	ss196417688
PZA-001456002	ss196417690
PZA-001618002	ss196417692
PZA-001619001	ss196417694
PZA-001751002	ss196417696
PZA-001755001	ss196417698
PZA-001804001	ss196417700
PZA-001935010	ss196417703
PZA-001972014	ss196417705
PZA-001974001	ss196417707
PZA-002002001	ss196417709
PZA-002049001	ss196417712
PZA-002094009	ss196417714
PZA-002174002	ss196417716
PZA-002264005	ss196417718
PZA-002390001	ss196417720
PZA-002478007	ss196417722
PZA-002613001	ss196417724
PZA-002614002	ss196417726
PZA-002699001	ss196417728
PZA-002742001	ss196417730
PZA-002811004	ss196417732
PZA-002872001	ss196417734
PZA-002969009	ss196417736
PZA-003058021	ss196417738
PZA-003064006	ss196417740
PZA-003166001	ss196417742
PZA-003182005	ss196417744
PZA-003385001	ss196417746
PZA-003713001	ss196417749
PZA-003723001	ss196417752
PZA-003733001	ss196417754
PZA-003741001	ss196417756
PZB-001112001	ss196417758
PZB-001115003	ss196417761
PUT-163a-101381786-1	ss196417763
PUT-163a-101382577-3	ss196417766
PUT-163a-101384373-4	ss196417768
PUT-163a-101384606-6	ss196417770
PUT-163a-101387821-12	ss196417772
PUT-163a-101388839-14	ss196417774
PUT-163a-101389210-15	ss196417776
PUT-163a-101389210-16	ss196417778
PUT-163a-101389953-18	ss196417780
PUT-163a-101390185-21	ss196417782
PUT-163a-101392844-22	ss196417784
PUT-163a-101393073-23	ss196417786
PUT-163a-101396692-24	ss196417788
PUT-163a-101396692-29	ss196417790
PUT-163a-101398342-33	ss196417792
PUT-163a-101398764-36	ss196417794
PUT-163a-101399336-39	ss196417796
PUT-163a-101401543-40	ss196417798
PUT-163a-110194326-44	ss196417800
PUT-163a-110194326-51	ss196417802
PUT-163a-110195977-54	ss196417804
PUT-163a-110195977-56	ss196417807
PUT-163a-110201780-59	ss196417809
PUT-163a-110202795-62	ss196417811
PUT-163a-110204885-63	ss196417813
PUT-163a-110206849-64	ss196417815
PUT-163a-110206849-65	ss196417817
PUT-163a-110206849-67	ss196417819
PUT-163a-110213635-72	ss196417821
PUT-163a-110221602-76	ss196417823
PUT-163a-110221602-77	ss196417825
PUT-163a-110481268-79	ss196417827
PUT-163a-110481268-80	ss196417829
PUT-163a-110481372-81	ss196417831
PUT-163a-110481993-82	ss196417833
PUT-163a-110504512-86	ss196417835
PUT-163a-110504512-88	ss196417838
PUT-163a-110504512-89	ss196417840
PUT-163a-110507767-91	ss196417843
PUT-163a-110516422-93	ss196417845
PUT-163a-110516422-94	ss196417847
PUT-163a-110516771-95	ss196417849
PUT-163a-110517263-96	ss196417851
PUT-163a-110518051-97	ss196417853
PUT-163a-110521911-100	ss196417855
PUT-163a-110522705-103	ss196417857
PUT-163a-110522705-105	ss196417859
PUT-163a-110522705-106	ss196417861
PUT-163a-110526130-107	ss196417863
PUT-163a-110526809-109	ss196417865
PUT-163a-110528154-112	ss196417867
PUT-163a-110541282-114	ss196417869
PUT-163a-110541282-116	ss196417871
PUT-163a-110541282-118	ss196417873
PUT-163a-110941068-122	ss196417875
PUT-163a-110942968-126	ss196417877
PUT-163a-110954028-127	ss196417879
PUT-163a-110957431-128	ss196417881
PUT-163a-110957431-129	ss196417883
PUT-163a-110957431-132	ss196417885
PUT-163a-110957431-133	ss196417887
PUT-163a-110963035-134	ss196417889
PUT-163a-110964923-135	ss196417891
PUT-163a-110964923-136	ss196417893
PUT-163a-110967306-138	ss196417895
PUT-163a-110971340-142	ss196417897
PUT-163a-111190332-143	ss196417899
PUT-163a-111191936-146	ss196417901
PUT-163a-111191936-147	ss196417903
PUT-163a-111191936-148	ss196417905
PUT-163a-113746821-154	ss196417907
PUT-163a-113760315-155	ss196417910
PUT-163a-12967977-159	ss196417912
PUT-163a-12967977-160	ss196417914
PUT-163a-13125867-163	ss196417916
PUT-163a-13125867-165	ss196417918
PUT-163a-13126581-167	ss196417920
PUT-163a-13126597-170	ss196417922
PUT-163a-13177814-171	ss196417924
PUT-163a-13177814-172	ss196417926
PUT-163a-13177998-175	ss196417928
PUT-163a-13178383-177	ss196417930
PUT-163a-13178383-179	ss196417932
PUT-163a-13178596-180	ss196417934
PUT-163a-13178596-181	ss196417937
PUT-163a-13198269-190	ss196417939
PUT-163a-13198279-191	ss196417941
PUT-163a-13198758-192	ss196417943
PUT-163a-13198758-193	ss196417945
PUT-163a-13237058-195	ss196417947
PUT-163a-13237098-196	ss196417949
PUT-163a-13237300-197	ss196417951
PUT-163a-13237300-198	ss196417953
PUT-163a-13249976-199	ss196417955
PUT-163a-13249976-201	ss196417957
PUT-163a-13381789-203	ss196417959
PUT-163a-13381789-204	ss196417961
PUT-163a-13381789-205	ss196417963
PUT-163a-13381909-209	ss196417965
PUT-163a-13382148-213	ss196417967
PUT-163a-13388727-218	ss196417969
PUT-163a-13388743-219	ss196417971
PUT-163a-13388772-220	ss196417973
PUT-163a-13389114-224	ss196417975
PUT-163a-13490777-226	ss196417977
PUT-163a-13490836-230	ss196417979
PUT-163a-13515860-232	ss196417981
PUT-163a-13515860-233	ss196417983
PUT-163a-13515860-234	ss196417985
PUT-163a-13515860-235	ss196417987
PUT-163a-13515901-236	ss196417989
PUT-163a-13515992-237	ss196417991
PUT-163a-13516036-239	ss196417993
PUT-163a-13516036-240	ss196417995
PUT-163a-13516036-241	ss196417997
PUT-163a-13516046-244	ss196417999
PUT-163a-13516057-247	ss196418001
PUT-163a-13557719-256	ss196418003
PUT-163a-13557940-262	ss196418005
PUT-163a-13558071-264	ss196418007
PUT-163a-13558074-265	ss196418009
PUT-163a-13558106-266	ss196418011
PUT-163a-13558106-270	ss196418013
PUT-163a-13558561-273	ss196418015
PUT-163a-13558812-276	ss196418017
PUT-163a-13558894-277	ss196418020
PUT-163a-13558909-278	ss196418022
PUT-163a-14206659-281	ss196418025
PUT-163a-14208484-282	ss196418027
PUT-163a-14242684-283	ss196418029
PUT-163a-14242945-289	ss196418031
PUT-163a-14243393-293	ss196418033
PUT-163a-14243393-294	ss196418035
PUT-163a-14243451-296	ss196418037
PUT-163a-14243719-298	ss196418039
PUT-163a-14243818-300	ss196418041
PUT-163a-14243818-301	ss196418043
PUT-163a-14243879-303	ss196418045
PUT-163a-14243879-304	ss196418047
PUT-163a-14243975-306	ss196418049
PUT-163a-14244132-307	ss196418051
PUT-163a-14244132-309	ss196418053
PUT-163a-14244132-310	ss196418055
PUT-163a-14244160-315	ss196418057
PUT-163a-14244221-316	ss196418059
PUT-163a-14244221-317	ss196418061
PUT-163a-14244221-318	ss196418063
PUT-163a-14244370-319	ss196418066
PUT-163a-14244370-320	ss196418068
PUT-163a-14244700-329	ss196418070
PUT-163a-14244713-330	ss196418072
PUT-163a-14244713-332	ss196418074
PUT-163a-14244713-333	ss196418076
PUT-163a-14244745-334	ss196418078
PUT-163a-14245173-338	ss196418080
PUT-163a-14245173-339	ss196418082
PUT-163a-14245438-342	ss196418084
PUT-163a-14245519-343	ss196418086
PUT-163a-14245519-344	ss196418088
PUT-163a-148928624-347	ss196418090
PUT-163a-148928624-349	ss196418093
PUT-163a-148928654-351	ss196418095
PUT-163a-148928873-366	ss196418097
PUT-163a-148929070-368	ss196418098
PUT-163a-148931114-379	ss196418100
PUT-163a-148931636-387	ss196418102
PUT-163a-148932938-397	ss196418104
PUT-163a-148934522-399	ss196418106
PUT-163a-148934796-402	ss196418109
PUT-163a-148935184-404	ss196418111
PUT-163a-148935184-405	ss196418113
PUT-163a-148935653-407	ss196418115
PUT-163a-148937427-415	ss196418117
PUT-163a-148937438-418	ss196418119
PUT-163a-148937438-419	ss196418121
PUT-163a-148937458-421	ss196418123
PUT-163a-148937489-423	ss196418125
PUT-163a-148937489-424	ss196418127
PUT-163a-148937637-425	ss196418129
PUT-163a-148937637-426	ss196418132
PUT-163a-148938321-429	ss196418135
PUT-163a-148939763-432	ss196418137
PUT-163a-148939817-433	ss196418139
PUT-163a-148940282-434	ss196418141
PUT-163a-148940529-435	ss196418143
PUT-163a-148940529-436	ss196418145
PUT-163a-148940757-437	ss196418147
PUT-163a-148941096-438	ss196418149
PUT-163a-148941238-439	ss196418151
PUT-163a-148941933-443	ss196418153
PUT-163a-148941943-446	ss196418155
PUT-163a-148941943-447	ss196418157
PUT-163a-148941995-448	ss196418159
PUT-163a-148942056-449	ss196418161
PUT-163a-148942482-452	ss196418163
PUT-163a-148942482-455	ss196418165
PUT-163a-148942558-457	ss196418167
PUT-163a-148942702-460	ss196418169
PUT-163a-148942702-461	ss196418171
PUT-163a-148942702-462	ss196418173
PUT-163a-148942702-464	ss196418176
PUT-163a-148943092-471	ss196418178
PUT-163a-148943092-472	ss196418180
PUT-163a-148943463-473	ss196418182
PUT-163a-148943685-475	ss196418184
PUT-163a-148943685-476	ss196418186
PUT-163a-148943685-477	ss196418189
PUT-163a-148944608-478	ss196418191
PUT-163a-148944618-481	ss196418193
PUT-163a-148945329-486	ss196418196
PUT-163a-148946654-487	ss196418198
PUT-163a-148946654-488	ss196418200
PUT-163a-148946654-489	ss196418202
PUT-163a-148946654-490	ss196418204
PUT-163a-148946654-491	ss196418206
PUT-163a-148946720-493	ss196418208
PUT-163a-148946720-494	ss196418210
PUT-163a-148947019-495	ss196418213
PUT-163a-148947767-496	ss196418215
PUT-163a-148948733-498	ss196418217
PUT-163a-148948733-499	ss196418219
PUT-163a-148949657-500	ss196418221
PUT-163a-148949657-501	ss196418223
PUT-163a-148949704-502	ss196418225
PUT-163a-148949704-503	ss196418227
PUT-163a-148949704-504	ss196418229
PUT-163a-148949777-505	ss196418231
PUT-163a-148949777-506	ss196418233
PUT-163a-148950351-508	ss196418235
PUT-163a-148950916-509	ss196418237
PUT-163a-148950916-510	ss196418239
PUT-163a-148951348-515	ss196418241
PUT-163a-148951459-516	ss196418243
PUT-163a-148951459-517	ss196418245
PUT-163a-148951746-518	ss196418247
PUT-163a-148951746-520	ss196418249
PUT-163a-148951746-521	ss196418252
PUT-163a-148952002-522	ss196418254
PUT-163a-148952002-523	ss196418256
PUT-163a-148952018-525	ss196418258
PUT-163a-148952843-529	ss196418261
PUT-163a-148953270-530	ss196418263
PUT-163a-148954015-533	ss196418265
PUT-163a-148954504-535	ss196418267
PUT-163a-148954504-536	ss196418269
PUT-163a-148955657-539	ss196418271
PUT-163a-148956747-550	ss196418273
PUT-163a-148956878-551	ss196418275
PUT-163a-148956878-552	ss196418277
PUT-163a-148957860-553	ss196418279
PUT-163a-148957860-554	ss196418281
PUT-163a-148957989-555	ss196418283
PUT-163a-148958166-556	ss196418285
PUT-163a-148958492-563	ss196418288
PUT-163a-148959370-565	ss196418290
PUT-163a-148959370-566	ss196418292
PUT-163a-148959862-567	ss196418294
PUT-163a-148959862-569	ss196418296
PUT-163a-148960159-570	ss196418298
PUT-163a-148960441-574	ss196418300
PUT-163a-148960523-575	ss196418302
PUT-163a-148960523-576	ss196418304
PUT-163a-148960677-577	ss196418306
PUT-163a-148961306-578	ss196418308
PUT-163a-148961306-579	ss196418310
PUT-163a-148962270-582	ss196418312
PUT-163a-148962814-585	ss196418314
PUT-163a-148962814-587	ss196418316
PUT-163a-148962848-588	ss196418318
PUT-163a-148963268-589	ss196418320
PUT-163a-148963268-590	ss196418322
PUT-163a-148963268-591	ss196418324
PUT-163a-148963330-592	ss196418326
PUT-163a-148963345-597	ss196418328
PUT-163a-148963646-603	ss196418330
PUT-163a-148963646-605	ss196418332
PUT-163a-148963646-608	ss196418334
PUT-163a-148963909-609	ss196418336
PUT-163a-148964266-610	ss196418338
PUT-163a-148964295-611	ss196418340
PUT-163a-148964320-612	ss196418342
PUT-163a-148964486-613	ss196418344
PUT-163a-148965480-616	ss196418346
PUT-163a-148965480-617	ss196418348
PUT-163a-148967445-623	ss196418350
PUT-163a-148967445-624	ss196418352
PUT-163a-148967576-625	ss196418354
PUT-163a-148967626-626	ss196418356
PUT-163a-148967626-627	ss196418358
PUT-163a-148967799-630	ss196418360
PUT-163a-148970214-639	ss196418362
PUT-163a-148970921-643	ss196418364
PUT-163a-148970922-644	ss196418366
PUT-163a-148971843-645	ss196418368
PUT-163a-148971843-646	ss196418370
PUT-163a-148972526-651	ss196418372
PUT-163a-148972807-652	ss196418374
PUT-163a-148972919-653	ss196418376
PUT-163a-148973751-659	ss196418378
PUT-163a-148973751-660	ss196418380
PUT-163a-148973751-661	ss196418382
PUT-163a-148974646-662	ss196418384
PUT-163a-148980630-665	ss196418386
PUT-163a-148981747-666	ss196418388
PUT-163a-148985612-671	ss196418390
PUT-163a-148985612-672	ss196418392
PUT-163a-148985612-677	ss196418394
PUT-163a-148986271-678	ss196418396
PUT-163a-148986559-684	ss196418399
PUT-163a-148986993-685	ss196418401
PUT-163a-148987187-689	ss196418403
PUT-163a-148990812-695	ss196418405
PUT-163a-148991135-699	ss196418406
PUT-163a-148991135-700	ss196418409
PUT-163a-148991135-703	ss196418411
PUT-163a-148991135-704	ss196418413
PUT-163a-148991534-705	ss196418415
PUT-163a-148991534-706	ss196418417
PUT-163a-148991534-709	ss196418419
PUT-163a-148991534-710	ss196418421
PUT-163a-148991595-711	ss196418423
PUT-163a-148991740-712	ss196418425
PUT-163a-148991740-713	ss196418427
PUT-163a-148993560-715	ss196418429
PUT-163a-148994380-717	ss196418431
PUT-163a-148995396-718	ss196418433
PUT-163a-148995421-721	ss196418435
PUT-163a-148999562-726	ss196418437
PUT-163a-149000535-730	ss196418439
PUT-163a-149001382-734	ss196418441
PUT-163a-149005002-739	ss196418443
PUT-163a-149005002-743	ss196418445
PUT-163a-149005002-744	ss196418447
PUT-163a-149005002-746	ss196418449
PUT-163a-149007696-748	ss196418451
PUT-163a-149007696-749	ss196418453
PUT-163a-149008027-750	ss196418455
PUT-163a-149008027-751	ss196418457
PUT-163a-149008324-754	ss196418459
PUT-163a-149009086-759	ss196418461
PUT-163a-149009086-760	ss196418463
PUT-163a-149009633-763	ss196418465
PUT-163a-149012393-767	ss196418467
PUT-163a-149012758-768	ss196418470
PUT-163a-149012758-769	ss196418472
PUT-163a-149013809-771	ss196418474
PUT-163a-149013809-772	ss196418476
PUT-163a-149014113-775	ss196418478
PUT-163a-149014113-776	ss196418481
PUT-163a-149014113-777	ss196418483
PUT-163a-149014113-778	ss196418485
PUT-163a-149015131-783	ss196418487
PUT-163a-149015131-784	ss196418489
PUT-163a-149026621-790	ss196418491
PUT-163a-149026703-794	ss196418493
PUT-163a-149041322-806	ss196418495
PUT-163a-149041322-807	ss196418497
PUT-163a-149042078-808	ss196418499
PUT-163a-149043264-811	ss196418501
[truncated: 55,841 more rows]
